# Supplementary material for: Catalytic asymmetric α-amination of carboxylic acids using isothioureas
Source: Royal Society of Chemistry journal article supplement (doi:10.1039/c2sc20171b), 2012-01-01

**Open flask and scaleable catalytic asymmetric  $\alpha$ -amination of carboxylic acids using  
isothiureas at low catalyst loadings**

*Louis C. Morrill, Alexandra M. Z. Slawin and Andrew D. Smith \**

*EaStCHEM, School of Chemistry, University of St Andrews, North Haugh, St Andrews, KY16  
9ST, UK.*

e-mail: [ads10@st-andrews.ac.uk](mailto:ads10@st-andrews.ac.uk), [lcm56@st-andrews.ac.uk](mailto:lcm56@st-andrews.ac.uk)

**SUPPORTING INFORMATION**

**Contents**

|                                            |            |
|--------------------------------------------|------------|
| <b>1.1 General Information</b>             | <b>S2</b>  |
| <b>1.2 General Experimental Procedures</b> | <b>S3</b>  |
| <b>1.3 Experimental Procedures</b>         | <b>S4</b>  |
| <b>1.4 NMR Analysis</b>                    | <b>S59</b> |
| <b>1.5 References and Notes</b>            | <b>S59</b> |

**Appendix I:  $^1\text{H}$  and  $^{13}\text{C}$  NMR Spectra for Novel Compounds and HPLC data**

## 1.1 General Information

Reactions involving moisture sensitive reagents were carried out under an argon atmosphere using standard vacuum line techniques in addition to freshly distilled solvents. All glassware used was flame dried and cooled under vacuum.

Solvents (THF, CH<sub>2</sub>Cl<sub>2</sub>, toluene, hexane and Et<sub>2</sub>O) were obtained anhydrous and purified by an alumina column (Mbraun SPS-800). Petrol is defined as petroleum ether 40-60 °C. All other solvents and commercial reagents were used as supplied without further purification unless stated otherwise.

Room temperature (rt) refers to 20-25 °C. Temperatures of 0 °C and -78 °C were obtained using ice/water and CO<sub>2</sub>(s)/acetone baths respectively. Temperatures of 0 °C to -50 °C for overnight reactions were obtained using an immersion cooler (HAAKE EK 90). Reflux conditions were obtained using an oil bath equipped with a contact thermometer. *In vacuo* refers to the use of a Büchi Rotavapor R-2000 rotary evaporator with a Vacubrand CVC<sub>2</sub> vacuum controller or a Heidolph Laborota 4001 rotary evaporator with a vacuum controller.

Analytical thin layer chromatography was performed on pre-coated aluminium plates (Kieselgel 60 F<sub>254</sub> silica). TLC visualisation was carried out with ultraviolet light (254 nm), followed by staining with a 1% aqueous KMnO<sub>4</sub> solution. Flash column chromatography was performed on Kieselgel 60 silica in the solvent system stated.

<sup>1</sup>H and <sup>13</sup>C nuclear magnetic resonance (NMR) spectra were acquired on either a Bruker Avance 300 (300 MHz, <sup>1</sup>H, 75 MHz <sup>13</sup>C), Bruker Avance II 400 (400 MHz, <sup>1</sup>H, 100 MHz <sup>13</sup>C) or a Bruker Avance II 400 (500 MHz, <sup>1</sup>H, 125 MHz <sup>13</sup>C) spectrometer at ambient temperature in the deuterated solvent stated. All chemical shifts are quoted in parts per million (ppm) relative to the residual solvent as the internal standard. All coupling constants, *J*, are quoted in Hz. Multiplicities are indicated by: s (singlet), d (doublet), t (triplet), q (quartet), ABq (AB quartet), sept (septet), oct (octet), m (multiplet), dd (doublet of doublets), ddd (doublet of doublet of doublets), dt (doublet of triplets) and td (triplet of doublets). The abbreviation Ar is used to denote aromatic, br to denote broad and app. to denote apparent.

Infrared spectra ( $\nu_{\max}$ ) were recorded on a Perkin-Elmer Spectrum GX FT-IR spectrometer using either thin films on NaCl plates or KBr discs. Only the characteristic peaks are quoted. Melting points were recorded on an Electrothermal apparatus and are uncorrected.

HPLC analyses were obtained on two separate machines; a Gilson HPLC consisting of a Gilson 305 pump, Gilson 306 pump, Gilson 811C dynamic mixer, Gilson 805 manometric module, Gilson 401C dilutor, Gilson 213XL sample injector and sample detection was performed with a Gilson 118 UV/vis detector while the temperature was assumed to be 20 °C; a Shimadzu HPLC consisting of a DGU-20A5 degasser, LC-20AT liquid chromatograph, SIL-20AHT autosampler, CMB-20A communications bus module, SPD-M20A diode array detector and a CTO-20A column oven which allowed the temperature to be set from 25-40

°C. Separation was achieved using Chiralcel OD-H and OJ-H columns or Chiralpak AD-H, AS-H, IA, IB, IC and ID columns.

Mass spectrometry ( $m/z$ ) data were acquired by electrospray ionisation (ESI), electron impact (EI) or nanospray ionisation (NSI) either at the University of St Andrews or the EPSRC National Mass Spectrometry Service Centre, Swansea. At the University of St Andrews, low and high resolution ESI MS were carried out on a Micromass LCT spectrometer. At the EPSRC National Mass Spectrometry Service Centre, low resolution NSI MS was carried out on a Micromass Quattro II spectrometer and high resolution NSI MS on a Thermofisher LTQ Orbitrap XL spectrometer.

Optical rotations were measured on a Perkin Elmer Precisely/Model-341 polarimeter operating at the sodium D line with a 100 mm path cell.

## 1.2 General Experimental Procedures

### **General procedure A:** *Cu(I) mediated N-arylation.*

To a flask under inert atmosphere was charged the requisite aryl iodide, copper iodide, 1,10-phenanthroline, cesium carbonate, benzyl carbazate and anhydrous dimethyl formamide and the reaction mixture was heated at 80 °C for 1 h. Once cool the reaction mixture was filtered and concentrated *in vacuo* to give the crude reaction mixture.

### **General procedure B:** *Hydrazine acylation.*

Following the procedure outlined by Bowman *et al.*,<sup>1</sup> to a solution of requisite hydrazine and triethylamine in Et<sub>2</sub>O at 0 °C was added the requisite acid chloride dropwise. The reaction mixture was stirred at 0 °C for 30 minutes before being filtered. The residue was washed with water and recrystallised from ethanol to give the hydazide.

### **General procedure C:** *Diazene formation.*

Following the procedure outlined by Bowman *et al.*,<sup>1</sup> to a solution of requisite hydrazide and pyridine in CH<sub>2</sub>Cl<sub>2</sub> at -78 °C was added *N*-bromosuccinimide portion wise. The reaction mixture was warmed to rt and stirred for 30 minutes before being filtered. The filtrate was concentrated *in vacuo* and the resulting solid was triturated with Et<sub>2</sub>O. The mixture was filtered and the filtrate was washed with 1M HCl followed by sat. aq. NaHCO<sub>3</sub>. The organic layer was dried (MgSO<sub>4</sub>), filtered and concentrated *in vacuo* to give the crude reaction mixture.

### **General procedure D:** *Michael addition-lactonization (racemic).*

To a solution of requisite acid in DCM were added DIPEA and either benzoyl chloride or *p*-methoxybenzoyl chloride at rt. The reaction mixture was allowed to stir at rt for 20 minutes.

The requisite Michael acceptor, Lewis base (1-20 mol%), and DIPEA were then added in that order at the required temperature. The reaction mixture was stirred at the required temperature until complete by TLC and was subsequently quenched by addition of 1M HCl. Once warmed to rt, the reaction mixture was poured into water and extracted twice with CH<sub>2</sub>Cl<sub>2</sub>. The combined organics were dried (MgSO<sub>4</sub>), filtered and concentrated *in vacuo* to give the crude reaction mixture.

**General procedure E:** *Michael addition-lactonization (asymmetric).*

To a solution of requisite acid in DCM were added DIPEA and either benzoyl chloride or p-methoxybenzoyl chloride at rt. The reaction mixture was allowed to stir at rt for 20 minutes. The requisite Lewis base (1-20 mol%), Michael acceptor and DIPEA were then added in that order at the required temperature. The reaction mixture was stirred at the required temperature until complete by TLC and was subsequently quenched by addition of 1M HCl. Once warmed to rt, the reaction mixture was poured into water and extracted twice with CH<sub>2</sub>Cl<sub>2</sub>. The combined organics were dried (MgSO<sub>4</sub>), filtered and concentrated *in vacuo* to give the crude reaction mixture.

**General procedure F:** *Samarium iodide N-N bond cleavage.*

To a solution of starting material in MeOH was added 0.1M SmI<sub>2</sub> and the reaction mixture was allowed to stir at -78 °C for 10 minutes. The reaction mixture was poured into sat. aq. NaHCO<sub>3</sub> and extracted twice with ethyl acetate. The combined organics were dried (MgSO<sub>4</sub>), filtered and concentrated *in vacuo* to give the crude reaction mixture.

### 1.3 Experimental Procedures

**benzyl 1-(4-(trifluoromethyl)phenyl)hydrazinecarboxylate**

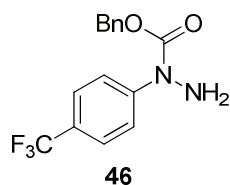

Following general procedure A 4-iodobenzotrifluoride (1.08 mL, 7.35 mmol), copper iodide (140 mg, 0.74 mmol), 1,10-phenanthroline (265 mg, 1.47 mmol), cesium carbonate (3.35 g, 10.3 mmol), benzyl carbazate (1.46 g, 8.82 mmol) and anhydrous dimethyl formamide (10 mL) gave, after chromatographic purification (eluent Et<sub>2</sub>O:petrol 25:75), amine **46** as a white solid (1.02 g, 45%); mp 62-64 °C;  $\nu_{\max}$  (KBr) 3367 (N-H), 2956 (C-H), 1684 (C=O), 1616, 1512;  $\delta_{\text{H}}$  (500 MHz, CDCl<sub>3</sub>) 4.52 (2H, s, NH<sub>2</sub>), 5.29 (2H, s, CH<sub>2</sub>), 7.38-7.41 (5H, m,



*ArH*), 7.58 (2H, d, *J* 8.7, *ArH*), 7.74 (2H, d, *J* 7.8, *ArH*);  $\delta_{\text{C}}$  (125 MHz,  $\text{CDCl}_3$ ) 68.7 ( $\text{CH}_2$ ), 122.4 (*ArC*), 124.2 (q, *J* 270,  $\text{CF}_3$ ), 125.5 (q, *J* 3.5, *ArC*), 126.3 (q, *J* 32.1, 4ry *ArC*), 128.4 (*ArC*), 128.6 (*ArC*), 128.7 (*ArC*), 135.5 (4ry *ArC*), 145.6 (4ry *ArC*), 155.5 ( $\text{C}=\text{O}$ ); *m/z* ( $\text{Cl}^+$ ) 311 ( $[\text{M}+\text{H}]^+$ , 100%); HRMS ( $\text{Cl}^+$ )  $\text{C}_{15}\text{H}_{14}\text{F}_3\text{N}_2\text{O}_2^+$  ( $[\text{M}+\text{H}]^+$ ) requires 311.1002; found 311.1005 (+1.0 ppm).

#### benzyl 1-(4-methoxyphenyl)hydrazinecarboxylate

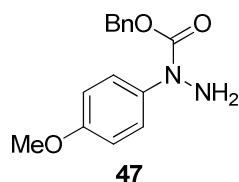

Following general procedure A, 4-iodoanisole (10.0 g, 42.7 mmol), copper iodide (0.81 g, 4.27 mmol), 1,10-phenanthroline (1.54 g, 8.55 mmol), cesium carbonate (19.5 g, 59.8 mmol), benzyl carbazate (8.51 g, 51.3 mmol) and anhydrous dimethyl formamide (45 mL) gave, after chromatographic purification (eluent  $\text{Et}_2\text{O}$ :petrol 50:50), amine **47** as a yellow solid (11.2 g, 96%); mp 69-71 °C; {lit.<sup>7</sup> mp 74-75 °C};  $\delta_{\text{H}}$  (300 MHz,  $\text{CDCl}_3$ ) 3.73 (3H, s,  $\text{CH}_3$ ), 4.30 (2H, br s,  $\text{NH}_2$ ), 5.13 (2H, s,  $\text{CH}_2$ ), 6.77-6.80 (2H, m, *ArH*), 7.23-7.29 (7H, m, *ArH*).

#### N'-phenylbenzohydrazide

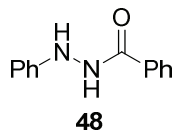

Following general procedure B, phenylhydrazine (1.82 mL, 18.5 mmol), triethylamine (2.58 mL, 18.5 mmol) and benzoyl chloride (2.18 mL, 15.6 mmol) in  $\text{Et}_2\text{O}$  (35 mL) gave, after recrystallisation from ethanol, hydrazide **48** as a white solid (1.60 g, 45%); mp 163-165 °C; {lit.<sup>1</sup> mp 171-172 °C};  $\delta_{\text{H}}$  (400 MHz,  $\text{CDCl}_3$ ) 6.30 (1H, br s, *NH*), 6.84-6.86 (3H, m, *ArH*), 7.15-7.19 (2H, m, *ArH*), 7.40 (2H, t, *J* 7.6, *ArH*), 7.49 (1H, t, *J* 7.4, *ArH*), 7.77 (2H, d, *J* 7.4, *ArH*), 7.94 (1H, br s, *NH*).

#### 4-fluoro-N'-phenylbenzohydrazide

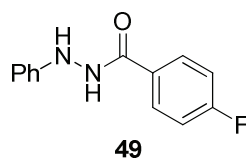

Following general procedure B, phenylhydrazine (0.55 mL, 5.59 mmol), triethylamine (0.78 mL, 5.59 mmol) and 4-fluorobenzoyl chloride (0.60 mL, 5.08 mmol) in  $\text{Et}_2\text{O}$  (20 mL) gave, after recrystallisation from ethanol, hydrazide **49** as a white solid (378 mg, 32%); mp 171-

173 °C; {lit.<sup>3</sup> mp 177-179 °C};  $\delta_{\text{H}}$  (300 MHz,  $\text{CDCl}_3$ ) 6.35 (1H, d,  $J$  3.5, NH), 6.96-7.00 (3H, m, ArH), 7.20 (2H, t,  $J$  8.6, ArH), 7.27-7.33 (2H, m, ArH), 7.85-7.93 (3H, m, ArH and NH).

#### 4-fluoro-N'-phenylbenzohydrazide

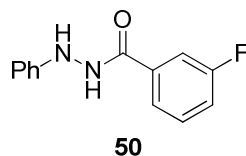

Following general procedure B, phenylhydrazine (0.91 mL, 9.25 mmol), triethylamine (1.29 mL, 9.25 mmol) and 3-fluorobenzoyl chloride (1.01 mL, 8.41 mmol) in  $\text{Et}_2\text{O}$  (20 mL) gave, after recrystallisation from ethanol, hydrazide **50** as a white solid (654 mg, 34%); mp 120-122 °C;  $\nu_{\text{max}}$  (KBr) 3251 (N-H), 3026 (C-H), 1646 (C=O), 1588, 1551;  $\delta_{\text{H}}$  (300 MHz,  $\text{CD}_3\text{OD}$ ) 6.79-6.88 (3H, m, ArH), 7.16-7.22 (2H, m, ArH), 7.29-7.35 (1H, m, ArH), 7.51 (1H, td,  $J$  8.0, 5.7, ArH), 7.62 (1H, dt,  $J$  9.6, 2.0, ArH), 7.71-7.74 (1H, m, ArH);  $\delta_{\text{C}}$  (75 MHz,  $\text{CD}_3\text{OD}$ ) 114.3 (ArC), 115.5 (d,  $J$  30.9, ArC), 119.9 (d,  $J$  28.5, ArC), 121.3 (ArC), 124.3 (d,  $J$  3.9, ArC), 130.0 (ArC), 131.8 (d,  $J$  10.6, ArC), 136.5 (d,  $J$  9.2, 4ry ArC), 150.0 (4ry ArC), 164.2 (d,  $J$  326, 4ry ArC), 168.8 (C=O);  $m/z$  ( $\text{NSI}^+$ ) 231 ( $[\text{M}+\text{H}]^+$ , 100%); HRMS ( $\text{NSI}^+$ )  $\text{C}_{13}\text{H}_{12}\text{FN}_2\text{O}^+$  ( $[\text{M}+\text{H}]^+$ ) requires 231.0928; found 231.0930 (+0.8 ppm).

#### 4-fluoro-N'-phenylbenzohydrazide

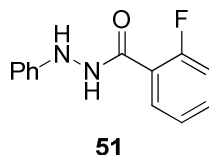

Following general procedure B, phenylhydrazine (0.91 mL, 9.25 mmol), triethylamine (1.29 mL, 9.25 mmol) and 2-fluorobenzoyl chloride (1.01 mL, 8.41 mmol) in  $\text{Et}_2\text{O}$  (20 mL) gave, after recrystallisation from ethanol, hydrazide **51** as a white solid (1.07 mg, 55%); mp 107-109 °C;  $\nu_{\text{max}}$  (KBr) 3272 (N-H), 3024 (C-H), 1639 (C=O), 1546, 1499;  $\delta_{\text{H}}$  (400 MHz,  $\text{CD}_3\text{OD}$ ) 6.80-6.84 (1H, m, ArH), 6.91 (2H, m, ArH), 7.18-7.31 (4H, m, ArH), 7.53-7.58 (1H, m, ArH), 7.72-7.76 (1H, m, ArH);  $\delta_{\text{C}}$  (75 MHz,  $\text{CD}_3\text{OD}$ ) 114.3 (ArC), 117.3 (d,  $J$  29.9, ArC), 121.3 (ArC), 123.1 (d,  $J$  19.7, 4ry ArC), 125.8 (d,  $J$  4.6, ArC), 130.1 (ArC), 131.5 (d,  $J$  3.3, ArC), 134.5 (d,  $J$  11.4, ArC), 149.9 (4ry ArC), 161.4 (d,  $J$  331, 4ry ArC), 167.2 (C=O);  $m/z$  ( $\text{NSI}^+$ ) 231 ( $[\text{M}+\text{H}]^+$ , 100%); HRMS ( $\text{NSI}^+$ )  $\text{C}_{13}\text{H}_{12}\text{FN}_2\text{O}^+$  ( $[\text{M}+\text{H}]^+$ ) requires 231.0928; found 231.0930 (+0.8 ppm).

#### 4-bromo-N'-phenylbenzohydrazide

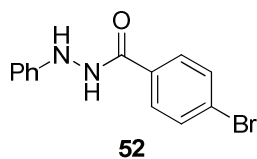

Following general procedure B, phenylhydrazine (0.91 mL, 9.25 mmol), triethylamine (1.29 mL, 9.25 mmol) and 4-bromobenzoyl chloride (1.85 g, 8.41 mmol) in Et<sub>2</sub>O (20 mL) gave, after recrystallisation from ethanol, hydrazide **52** as a white solid (828 mg, 34%); mp 196-198 °C; {lit.<sup>3</sup> mp 198-199 °C}; δ<sub>H</sub> (400 MHz, CDCl<sub>3</sub>) 6.35 (1H, d, *J* 3.4, *NH*), 6.94-6.98 (3H, m, *ArH*), 7.26-7.30 (2H, m, *ArH*), 7.65 (2H, d, *J* 8.5 *ArH*), 7.74 (2H, d, *J* 8.5, *ArH*), 7.96 (1H, br s, *NH*).

#### 4-chloro-N'-phenylbenzohydrazide

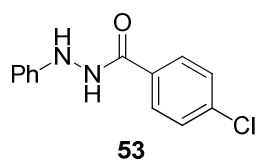

Following general procedure B, phenylhydrazine (0.91 mL, 9.25 mmol), triethylamine (1.29 mL, 9.25 mmol) and 4-chlorobenzoyl chloride (1.08 mL, 8.41 mmol) in Et<sub>2</sub>O (20 mL) gave, after recrystallisation from ethanol, hydrazide **53** as a white solid (1.17 g, 56%); mp 166-168 °C; {lit.<sup>3</sup> mp 193-195 °C}; δ<sub>H</sub> (400 MHz, CDCl<sub>3</sub>) 6.35 (1H, d, *J* 3.5, *NH*), 6.94-6.99 (3H, m, *ArH*), 7.27-7.31 (2H, m, *ArH*), 7.49 (2H, d, *J* 8.5 *ArH*), 7.82 (2H, d, *J* 8.5, *ArH*), 7.93 (1H, br s, *NH*).

#### N'-phenyl-1-naphthohydrazide

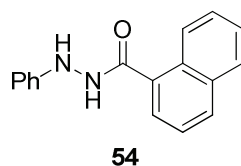

Following general procedure B, phenylhydrazine (0.91 mL, 9.25 mmol), triethylamine (1.29 mL, 9.25 mmol) and 1-naphthoyl chloride (1.27 mL, 8.41 mmol) in Et<sub>2</sub>O (20 mL) gave, after recrystallisation from ethanol, hydrazide **54** as a white solid (740 mg, 34%); mp 194-196 °C; {lit.<sup>5</sup> mp 240 °C}; δ<sub>H</sub> (300 MHz, CDCl<sub>3</sub>) 6.52 (1H, d, *J* 4.3, *NH*), 6.99-7.05 (3H, m, *ArH*), 7.32-7.37 (2H, m, *ArH*), 7.52-7.64 (3H, m, *ArH*), 7.77-7.79 (2H, m, *ArH*), 7.92-7.96 (1H, m, *ArH*), 8.03 (1H, d, *J* 8.3, *ArH*), 8.36-8.39 (1H, m, *NH*).

#### 4-nitro-N'-phenylbenzohydrazide

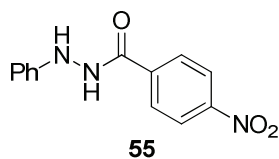

Following general procedure B, phenylhydrazine (1.82 mL, 18.5 mmol), triethylamine (2.58 mL, 16.8 mmol) and 4-nitrobenzoyl chloride (3.12 g, 16.8 mmol) in Et<sub>2</sub>O (35 mL) gave, after recrystallisation from ethanol, hydrazide **55** as an orange solid (2.06 g, 48%); mp 198-200 °C; {lit.<sup>2</sup> mp 206 °C}; δ<sub>H</sub> (400 MHz, CDCl<sub>3</sub>) 6.37 (1H, d, *J* 3.0, *NH*), 6.96-7.00 (3H, m, *ArH*), 7.31-7.33 (2H, m, *ArH*), 8.01-8.06 (3H, m, *ArH* and *NH*), 8.38 (2H, d, *J* 8.8, *ArH*).

#### 4-methyl-N'-phenylbenzohydrazide

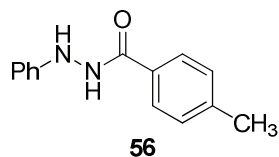

Following general procedure B, phenylhydrazine (0.91 mL, 9.25 mmol), triethylamine (1.29 mL, 9.25 mmol) and p-toluoyl chloride (1.11 mL, 8.41 mmol) in Et<sub>2</sub>O (20 mL) gave, after recrystallisation from ethanol, hydrazide **56** as a white solid (0.83 g, 44%); mp 166-167 °C; {lit.<sup>2</sup> mp 172 °C}; δ<sub>H</sub> (300 MHz, CDCl<sub>3</sub>) 2.36 (3H, s, *CH*<sub>3</sub>), 6.26 (1H, d, *J* 3.5, *NH*), 6.87 (2H, d, *J* 8.2, *ArH*), 7.15-7.22 (5H, m, *ArH*), 7.68 (2H, d, *J* 8.2, *ArH*), 7.76 (1H, br s, *NH*).

#### N'-phenylfuran-2-carbohydrazide

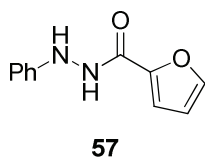

Following general procedure B, phenylhydrazine (0.91 mL, 9.25 mmol), triethylamine (1.29 mL, 9.25 mmol) and 2-furoyl chloride (0.83 mL, 8.41 mmol) in Et<sub>2</sub>O (20 mL) gave, after recrystallisation from ethanol, hydrazide **57** as a white solid (0.80 g, 47%); mp 141-142 °C; {lit.<sup>6</sup> mp 144-145 °C}; δ<sub>H</sub> (300 MHz, CDCl<sub>3</sub>) 6.24 (1H, br s, *NH*), 6.60 (1H, dd, *J* 3.5, 1.7, *ArH*), 6.94-6.98 (3H, m, *ArH*), 7.24-7.35 (3H, m, *ArH*), 7.56 (1H, d, *J* 1.0, *ArH*), 8.10 (1H, br s, *NH*).

### N'-(4-methoxyphenyl)-4-(trifluoromethyl)benzohydrazide

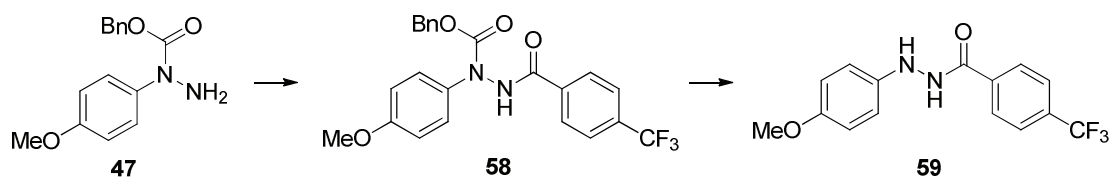

To a solution of **47** (11.1 g, 40.8 mmol) and triethylamine (6.25 mL, 44.9 mmol) in EtOAc (100 mL) at 0 °C was added 4-trifluoromethylbenzoyl chloride (6.06 mL, 40.8 mmol). The reaction mixture was stirred at rt for 1 h. The reaction mixture was washed with 1M HCl and sat. aq. NaHCO<sub>3</sub>. The organic layer was dried (MgSO<sub>4</sub>), filtered and concentrated *in vacuo* to give the crude acylated product **58** which was used without purification. To a solution of crude acylated product **58** (17.7 g, 40.8 mmol assuming 100% conversion) and 10% palladium on charcoal (4.27 g, 4.08 mmol, 10 mol%) in EtOAc (100 mL) was appended a balloon of hydrogen gas. The hydrogen gas was allowed to bubble through the reaction mixture at rt for 4 h. The reaction mixture was filtered through celite and concentrated *in vacuo*. Recrystallisation from ethanol gave hydrazide **59** as a white solid (7.95 g, 63% over 2 steps); mp 158-160 °C;  $\nu_{\max}$  (KBr) 3270 (N-H), 3068 (C-H), 1649 (C=O), 1551, 1510;  $\delta_{\text{H}}$  (300 MHz, (CH<sub>3</sub>)<sub>2</sub>S=O) 3.67 (3H, s, CH<sub>3</sub>), 6.79 (4H, s, ArH), 7.69 (1H, d, *J* 2.5, NH), 7.89 (2H, d, *J* 8.2, ArH), 8.11 (2H, d, *J* 8.1, ArH), 10.6 (1H, d, *J* 2.2, NH);  $\delta_{\text{C}}$  (75 MHz, (CH<sub>3</sub>)<sub>2</sub>S=O) 55.2 (CH<sub>3</sub>), 113.9 (ArC), 114.3 (ArC), 123.9 (q, *J* 271, CF<sub>3</sub>), 125.5 (q, *J* 3.7, ArC), 128.2 (ArC), 131.4 (q, *J* 31.7, 4ry ArC), 136.9 (4ry ArC), 143.0 (4ry ArC), 152.8 (4ry ArC), 165.1 (C=O); *m/z* (NSI<sup>+</sup>) 311 ([M+H]<sup>+</sup>, 100%); HRMS (NSI<sup>+</sup>) C<sub>15</sub>H<sub>14</sub>F<sub>3</sub>N<sub>2</sub>O<sub>2</sub><sup>+</sup> ([M+H]<sup>+</sup>) requires 311.1002; found 311.1005 (+1.0 ppm).

### (E)-phenyl(phenyldiazenyl)methanone

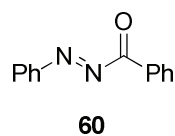

Following general procedure C, hydrazide **48** (1.5 g, 7.08 mmol), pyridine (0.63 mL, 7.79 mmol) and *N*-bromosuccinimide (1.26 g, 7.08 mmol) in CH<sub>2</sub>Cl<sub>2</sub> (7 mL) gave, after chromatographic purification (eluent Et<sub>2</sub>O:petrol 20:80), diazene **60** as a red oil (1.17 g, 79%);  $\delta_{\text{H}}$  (400 MHz, CDCl<sub>3</sub>) 7.43-7.63 (6H, m, ArH), 7.91-8.02 (4H, m, ArH).

### (E)-((4-fluorophenyl)diazenyl)(phenyl)methanone

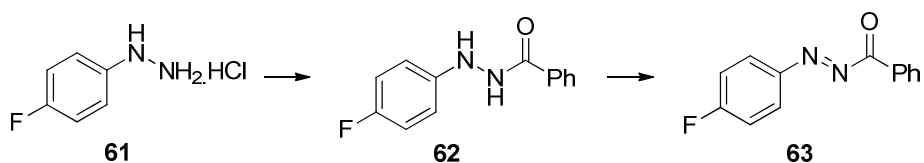

To a solution of 4-fluorophenylhydrazine hydrochloride **61** (2.00 g, 12.3 mmol) and triethylamine (3.43 mL, 24.6 mmol) in Et<sub>2</sub>O (30 mL) at 0 °C was slowly added benzoyl chloride (1.29 mL, 11.2 mmol). After stirring at rt for 30 minutes the reaction mixture was concentration *in vacuo*. The solid was dissolved in CH<sub>2</sub>Cl<sub>2</sub> and washed with 1M HCl. The organic layer was dried (MgSO<sub>4</sub>), filtered and concentrated *in vacuo* to give a crude hydrazide **62** which was used without purification. Following general procedure C, hydrazide **62** (2.57 g, 11.2 mmol assuming 100% conversion), pyridine (1.07 mL, 12.3 mmol) and *N*-bromosuccinimide (1.98 g, 11.2 mmol) in CH<sub>2</sub>Cl<sub>2</sub> (15 mL) gave, after chromatographic purification (eluent Et<sub>2</sub>O:petrol 20:80), diazene **63** as a red solid (545 mg, 21% over 2 steps); mp 48-50 °C;  $\nu_{\max}$  (KBr) 3067 (C-H), 1702 (C=O), 1591, 1503;  $\delta_{\text{H}}$  (300 MHz, CDCl<sub>3</sub>) 7.26-7.32 (2H, m, ArH), 7.54-7.60 (2H, m, ArH), 7.68-7.74 (1H, m, ArH), 8.06-8.12 (4H, m, ArH);  $\delta_{\text{C}}$  (75 MHz, CDCl<sub>3</sub>) 116.5 (d, *J* 23.0, ArC), 126.0 (d, *J* 9.5, ArC), 128.9 (ArC), 130.6 (ArC), 130.9 (4ry ArC), 134.6 (ArC), 148.7 (d, 2.9, 4ry ArC), 165.9 (d, *J* 254, 4ry ArC), 181.7 (C=O); *m/z* (ES<sup>+</sup>) 251 ([M+Na]<sup>+</sup>, 100%); HRMS (ES<sup>+</sup>) C<sub>13</sub>H<sub>9</sub>FN<sub>2</sub>NaO<sup>+</sup> ([M+Na]<sup>+</sup>) requires 251.0597; found 251.0590 (-2.5 ppm).

**(E)-(4-fluorophenyl)(phenyldiazenyl)methanone**

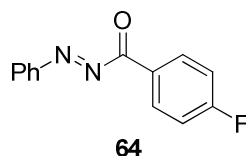

Following general procedure C, hydrazide **49** (370 mg, 1.61 mmol), pyridine (0.14 mL, 1.77 mmol) and *N*-bromosuccinimide (0.29 g, 1.61 mmol) in CH<sub>2</sub>Cl<sub>2</sub> (5 mL) gave, after chromatographic purification (eluent Et<sub>2</sub>O:petrol 20:80), diazene **64** as a red oil (280 mg, 76%);  $\nu_{\max}$  (thin film) 3068 (C-H), 1707 (C=O), 1597, 1507;  $\delta_{\text{H}}$  (400 MHz, CDCl<sub>3</sub>) 7.20-7.26 (2H, m, ArH), 7.58-7.67 (3H, m, ArH), 8.02-8.05 (2H, m, ArH), 8.12-8.17 (2H, m, ArH);  $\delta_{\text{C}}$  (100 MHz, CDCl<sub>3</sub>) 116.3 (d, *J* 21.9, ArC), 123.7 (ArC), 127.4 (d, *J* 2.7, 4ry ArC), 129.4 (ArC), 133.4 (d, *J* 9.7, ArC), 133.7 (ArC), 152.1 (4ry ArC), 166.6 (d, *J* 256, 4ry ArC), 180.5 (C=O); *m/z* (ES<sup>+</sup>) 251 ([M+Na]<sup>+</sup>, 100%); HRMS (ES<sup>+</sup>) C<sub>13</sub>H<sub>9</sub>FN<sub>2</sub>NaO<sup>+</sup> ([M+Na]<sup>+</sup>) requires 251.0597; found 251.0602 (+2.1 ppm).

**(E)-(3-fluorophenyl)(phenyldiazenyl)methanone**

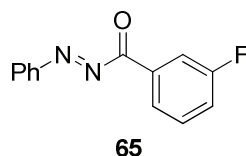

Following general procedure C, hydrazide **50** (488 mg, 2.13 mmol), pyridine (0.19 mL, 2.34 mmol) and *N*-bromosuccinimide (0.38 g, 2.13 mmol) in CH<sub>2</sub>Cl<sub>2</sub> (5 mL) gave, after

chromatographic purification (eluent Et<sub>2</sub>O:petrol 20:80), diazene **65** as a red oil (362 mg, 75%);  $\nu_{\max}$  (thin film) 3073 (C-H), 1716 (C=O), 1589, 1499;  $\delta_{\text{H}}$  (400 MHz, CDCl<sub>3</sub>) 7.37-7.42 (1H, m, *ArH*), 7.54 (1H, td, *J* 8.0, 5.4, *ArH*), 7.58-7.68 (3H, m, *ArH*), 7.81 (1H, ddd, *J* 9.0, 2.6, 1.5, *ArH*), 7.88-7.90 (1H, m, *ArH*), 8.02-8.05 (2H, m, *ArH*);  $\delta_{\text{C}}$  (100 MHz, CDCl<sub>3</sub>) 117.2 (d, *J* 22.8, *ArC*), 121.7 (d, *J* 21.3, *ArC*), 123.8 (*ArC*), 126.4 (d, *J* 3.0, *ArC*), 129.5 (*ArC*), 130.7 (d, *J* 7.4, *ArC*), 133.0 (d, *J* 6.7, 4ry *ArC*), 133.8 (*ArC*), 152.1 (4ry *ArC*), 162.7 (d, *J* 247, 4ry *ArC*), 180.6 (C=O); *m/z* (ES<sup>+</sup>) 251 ([M+Na]<sup>+</sup>, 100%); HRMS (ES<sup>+</sup>) C<sub>13</sub>H<sub>9</sub>FN<sub>2</sub>NaO<sup>+</sup> ([M+Na]<sup>+</sup>) requires 251.0597; found 251.0602 (+2.1 ppm).

**(E)-(2-fluorophenyl)(phenyldiazenyl)methanone**

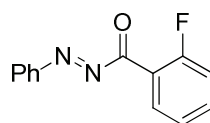

**66**

Following general procedure C, hydrazide **51** (800 mg, 3.49 mmol), pyridine (0.31 mL, 3.84 mmol) and *N*-bromosuccinimide (0.62 g, 3.49 mmol) in CH<sub>2</sub>Cl<sub>2</sub> (5 mL) gave, after chromatographic purification (eluent Et<sub>2</sub>O:petrol 20:80), diazene **66** as a red oil (540 mg, 68%);  $\nu_{\max}$  (thin film) 3066 (C-H), 1695 (C=O), 1609, 1586, 1505;  $\delta_{\text{H}}$  (300 MHz, CDCl<sub>3</sub>) 7.20 (1H, ddd, *J* 10.6, 8.4, 1.0, *ArH*), 7.36 (1H, td, *J* 7.6, 0.9, *ArH*), 7.56-7.71 (4H, m, *ArH*), 7.98-8.02 (2H, m, *ArH*), 8.13 (1H, ddd, *J* 7.8, 7.1, 1.8, *ArH*);  $\delta_{\text{C}}$  (75 MHz, CDCl<sub>3</sub>) 117.2 (d, *J* 29.3, *ArC*), 119.3 (d, *J* 15.0, 4ry *ArC*), 123.6 (*ArC*), 124.6 (d, *J* 4.8, *ArC*), 129.4 (*ArC*), 132.5 (*ArC*), 133.4 (*ArC*), 136.4 (d, *J* 12.0, *ArC*), 152.1 (4ry *ArC*), 162.5 (d, *J* 346, 4ry *ArC*), 180.9 (d, *J* 7.8, C=O); *m/z* (ES<sup>+</sup>) 251 ([M+Na]<sup>+</sup>, 100%); HRMS (ES<sup>+</sup>) C<sub>13</sub>H<sub>9</sub>FN<sub>2</sub>NaO<sup>+</sup> ([M+Na]<sup>+</sup>) requires 251.0597; found 251.0593 (-1.4 ppm).

**(E)-(4-bromophenyl)(phenyldiazenyl)methanone**

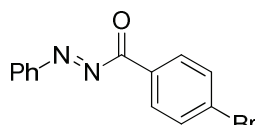

**67**

Following general procedure C, hydrazide **52** (0.82 g, 2.82 mmol), pyridine (0.26 mL, 3.10 mmol) and *N*-bromosuccinimide (0.50 g, 2.82 mmol) in CH<sub>2</sub>Cl<sub>2</sub> (5 mL) gave, after chromatographic purification (eluent Et<sub>2</sub>O:petrol 20:80), diazene **67** as a red solid (669 mg, 82%); mp 39-40 °C; {lit.<sup>4</sup> mp 38-39.5 °C};  $\delta_{\text{H}}$  (300 MHz, CDCl<sub>3</sub>) 7.57-7.66 (3H, m, *ArH*), 7.68-7.72 (2H, m, *ArH*), 7.95-7.99 (2H, m, *ArH*), 8.01-8.04 (2H, m, *ArH*).

**(E)-(4-chlorophenyl)(phenyldiazenyl)methanone**

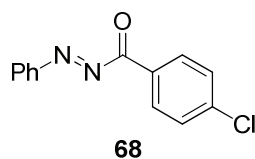

Following general procedure C, hydrazide **53** (1.16 g, 4.71 mmol), pyridine (0.42 mL, 5.18 mmol) and *N*-bromosuccinimide (0.84 g, 4.71 mmol) in CH<sub>2</sub>Cl<sub>2</sub> (5 mL) gave, after chromatographic purification (eluent Et<sub>2</sub>O:petrol 20:80), diazene **68** as a red oil (0.91 g, 76%);  $\nu_{\max}$  (thin film) 3064 (C-H), 1701 (C=O), 1591, 1500;  $\delta_{\text{H}}$  (300 MHz, CDCl<sub>3</sub>) 7.50-7.55 (2H, m, *ArH*), 7.57-7.67 (3H, m, *ArH*), 8.01-8.07 (4H, m, *ArH*);  $\delta_{\text{C}}$  (75 MHz, CDCl<sub>3</sub>) 123.8 (*ArC*), 129.4 (*ArC*), 129.5 (*ArC*), 131.9 (*ArC*), 131.9 (4ry *ArC*), 133.7 (*ArC*), 141.2 (4ry *ArC*), 152.1 (4ry *ArC*), 180.8 (C=O);  $m/z$  (ES<sup>+</sup>) 267 ([M+Na]<sup>+</sup>, 100%); HRMS (ES<sup>+</sup>) C<sub>9</sub>H<sub>13</sub><sup>35</sup>ClN<sub>2</sub>NaO<sub>3</sub><sup>+</sup> ([M+Na]<sup>+</sup>) requires 267.0303; found 267.0302 (-0.3 ppm).

**(E)-naphthalen-1-yl(phenyldiazenyl)methanone**

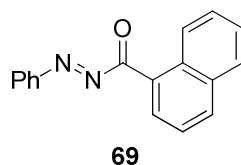

Following general procedure C, hydrazide **54** (0.74 g, 2.81 mmol), pyridine (0.26 mL, 3.10 mmol) and *N*-bromosuccinimide (0.50 g, 2.81 mmol) in CH<sub>2</sub>Cl<sub>2</sub> (5 mL) gave, after chromatographic purification (eluent Et<sub>2</sub>O:petrol 20:80), diazene **69** as a red solid (575 mg, 79%); mp 76-78 °C;  $\nu_{\max}$  (KBr) 3061 (C-H), 1697 (C=O), 1591, 1500;  $\delta_{\text{H}}$  (400 MHz, CDCl<sub>3</sub>) 7.54-7.66 (5H, m, *ArH*), 7.76 (1H, ddd, *J* 8.6, 7.0, 1.4, *ArH*), 7.96 (1H, dd, *J* 8.2, 0.4, *ArH*), 8.05-8.07 (2H, m, *ArH*), 8.15 (1H, d, *J* 8.2, *ArH*), 8.31 (1H, dd, *J* 7.3, 1.2, *ArH*), 9.25 (1H, d, *J* 8.7, *ArH*);  $\delta_{\text{C}}$  (100 MHz, CDCl<sub>3</sub>) 123.7 (*ArC*), 124.4 (*ArC*), 126.2 (*ArC*), 126.9 (*ArC*), 127.1 (4ry *ArC*), 128.8 (*ArC*), 129.0 (*ArC*), 129.4 (*ArC*), 131.6 (4ry *ArC*), 133.3 (*ArC*), 133.4 (*ArC*), 134.1 (4ry *ArC*), 135.6 (*ArC*), 152.1 (4ry *ArC*), 183.1 (C=O);  $m/z$  (ES<sup>+</sup>) 283 ([M+Na]<sup>+</sup>, 100%); HRMS (ES<sup>+</sup>) C<sub>17</sub>H<sub>12</sub>N<sub>2</sub>NaO<sup>+</sup> ([M+Na]<sup>+</sup>) requires 283.0847; found 283.0848 (+0.2 ppm).

**(E)-(4-nitrophenyl)(phenyldiazenyl)methanone**

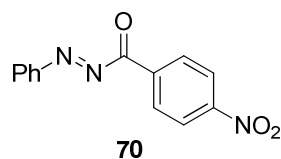

Following general procedure C, hydrazide **55** (2.00 g, 7.78 mmol), pyridine (0.69 mL, 8.56 mmol) and *N*-bromosuccinimide (1.39 g, 7.78 mmol) in CH<sub>2</sub>Cl<sub>2</sub> (10 mL) gave, after



chromatographic purification (eluent Et<sub>2</sub>O:petrol 50:50), diazene **70** as a red solid (0.91 g, 46%); mp 127-129 °C;  $\nu_{\max}$  (KBr) 3080 (C-H), 1711 (C=O), 1605, 1529, 1499;  $\delta_{\text{H}}$  (300 MHz, CDCl<sub>3</sub>) 7.50-7.62 (3H, m, ArH), 7.94-7.97 (2H, m, ArH), 8.19-8.23 (2H, m, ArH), 8.29-8.33 (2H, m, ArH);  $\delta_{\text{C}}$  (100 MHz, CDCl<sub>3</sub>) 124.0 (ArC), 124.0 (ArC), 129.6 (ArC), 131.7 (ArC), 134.3 (ArC), 136.1 (4ry ArC), 151.1 (4ry ArC), 152.1 (4ry ArC), 179.7 (C=O);  $m/z$  (APCI<sup>+</sup>) 256 ([M+H]<sup>+</sup>, 100%); HRMS (APCI<sup>+</sup>) C<sub>13</sub>H<sub>10</sub>N<sub>3</sub>O<sup>+</sup> ([M+H]<sup>+</sup>) requires 256.0717; found 256.0714 (-1.0 ppm).

#### (E)-(phenyldiazenyl)(p-tolyl)methanone

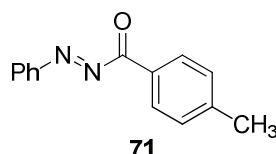

Following general procedure C, hydrazide **56** (0.82 g, 3.63 mmol), pyridine (0.32 mL, 4.00 mmol) and *N*-bromosuccinimide (0.65 g, 3.63 mmol) in CH<sub>2</sub>Cl<sub>2</sub> (5 mL) gave, after chromatographic purification (eluent Et<sub>2</sub>O:petrol 15:85), diazene **71** as a red oil (0.63 g, 77%);  $\delta_{\text{H}}$  (400 MHz, CDCl<sub>3</sub>) 2.38 (3H, s, CH<sub>3</sub>), 7.25 (2H, d, *J* 8.0, ArH), 7.47-7.55 (3H, m, ArH), 7.87-7.94 (4H, m, ArH).

#### (E)-furan-2-yl(phenyldiazenyl)methanone

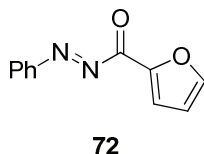

Following general procedure C, hydrazide **57** (0.79 g, 3.91 mmol), pyridine (0.35 mL, 4.30 mmol) and *N*-bromosuccinimide (0.69 g, 3.91 mmol) in CH<sub>2</sub>Cl<sub>2</sub> (5 mL) gave, after chromatographic purification (eluent Et<sub>2</sub>O:petrol 20:80), diazene **72** as a red oil (405 mg, 52%);  $\delta_{\text{H}}$  (300 MHz, CDCl<sub>3</sub>) 6.70 (1H, dd, *J* 3.6, 1.7, ArH), 7.45 (1H, dd, *J* 3.6, 0.7, ArH), 7.58-7.69 (3H, m, ArH), 7.84 (1H, dd, *J* 1.7, 0.7, ArH), 8.03-8.07 (2H, m, ArH).

#### (E)-4-(benzoyldiazenyl)benzonitrile

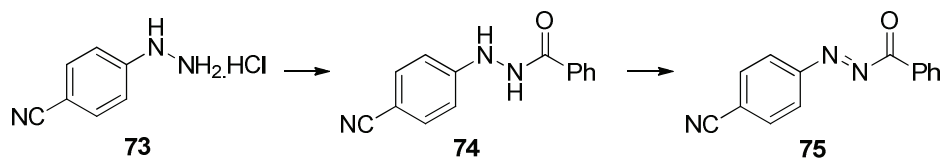

To a solution of 4-cyanophenylhydrazine hydrochloride **73** (2.00 g, 11.8 mmol) and triethylamine (3.29 mL, 23.6 mmol) in Et<sub>2</sub>O (30 mL) at 0 °C was slowly added benzoyl chloride (1.24 mL, 10.7 mmol). After stirring at rt for 30 minutes the reaction mixture was

concentration *in vacuo*. The solid was dissolved in CH<sub>2</sub>Cl<sub>2</sub> and washed with 1M HCl. The organic layer was dried (MgSO<sub>4</sub>), filtered and concentrated *in vacuo* to give a crude hydrazide **74** which was used without purification. Following general procedure C, hydrazide **74** (2.54 g, 10.7 mmol assuming 100% conversion), pyridine (0.97 mL, 11.8 mmol) and *N*-bromosuccinimide (1.90 g, 10.7 mmol) in CH<sub>2</sub>Cl<sub>2</sub> (15 mL) gave, after chromatographic purification (eluent Et<sub>2</sub>O:petrol 20:80), diazene **75** as a purple solid (258 mg, 10% over 2 steps); mp 110-112 °C;  $\nu_{\max}$  (KBr) 3043 (C-H), 2229 (C≡N), 1706 (C=O), 1598, 1506;  $\delta_{\text{H}}$  (400 MHz, CDCl<sub>3</sub>) 7.57 (2H, t, *J* 7.7, ArH), 7.73 (1H, t, *J* 7.4, ArH), 7.91 (2H, d, *J* 8.4, ArH), 8.05 (2H, d, *J* 7.3, ArH), 8.09 (2H, d, *J* 8.4, ArH);  $\delta_{\text{C}}$  (75 MHz, CDCl<sub>3</sub>) 116.5 (C≡N), 117.9 (4ry ArC), 123.9 (ArC), 129.1 (ArC), 130.2 (4ry ArC), 130.6 (ArC), 133.5 (ArC), 135.0 (ArC), 153.5 (4ry ArC), 181.5 (C=O); *m/z* (ES<sup>+</sup>) 236 ([M+H]<sup>+</sup>, 100%); HRMS (ES<sup>+</sup>) C<sub>14</sub>H<sub>10</sub>N<sub>3</sub>O<sup>+</sup> ([M+H]<sup>+</sup>) requires 236.0824; found 236.0824 (+0.2 ppm).

#### (E)-phenyl((4-(trifluoromethyl)phenyl)diazenyl)methanone

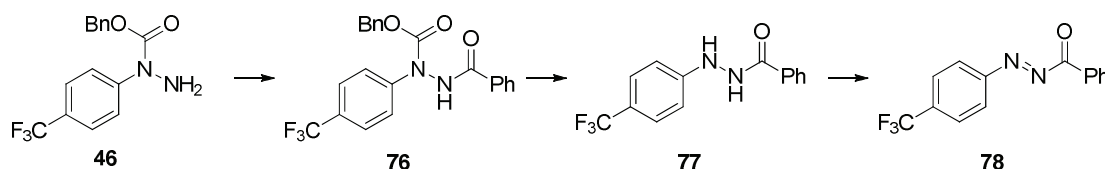

To a solution of **46** (1.00 g, 3.226 mmol) and triethylamine (0.49 mL, 3.55 mmol) in EtOAc (10 mL) at 0 °C was added benzoyl chloride (0.37 mL, 3.23 mmol). The reaction mixture was stirred at rt for 1 h. The reaction mixture was washed with 1M HCl and sat. aq. NaHCO<sub>3</sub>. The organic layer was dried (MgSO<sub>4</sub>), filtered and concentrated *in vacuo* to give the crude acylated product **76** which was used without purification. To a solution of crude acylated product **76** (1.34 g, 3.23 mmol assuming 100% conversion) and 10% palladium on charcoal (0.34 g, 0.32 mmol, 10 mol%) in EtOAc (10 mL) was appended a balloon of hydrogen gas. The hydrogen gas was allowed to bubble through the reaction mixture at rt for 4 h. The reaction mixture was filtered through celite and concentrated *in vacuo* to give the hydrazide **77** which was used without purification. Following general procedure C, hydrazide **77** (903 mg, 3.23 mmol assuming 100% conversion), pyridine (0.29 mL, 3.55 mmol) and *N*-bromosuccinimide (0.57 g, 3.23 mmol) in CH<sub>2</sub>Cl<sub>2</sub> (10 mL) gave, after chromatographic purification (eluent Et<sub>2</sub>O:petrol 10:90), diazene **78** as a red oil (601 mg, 66% over 3 steps);  $\nu_{\max}$  (thin film) 3070 (C-H), 1716 (C=O), 1599;  $\delta_{\text{H}}$  (500 MHz, CDCl<sub>3</sub>) 7.46 (2H, t, *J* 7.8, ArH), 7.61 (1H, t, *J* 7.5, ArH), 7.76 (2H, d, *J* 8.3, ArH), 7.94-7.96 (2H, m, ArH), 8.00 (2H, d, *J* 8.2, ArH);  $\delta_{\text{C}}$  (125 MHz, CDCl<sub>3</sub>) 123.6 (q, *J* 271, CF<sub>3</sub>), 123.7 (ArC), 126.7 (q, *J* 3.5, ArC), 129.0 (ArC), 130.3 (4ry ArC), 130.6 (ArC), 134.4 (q, *J* 32.5, 4ry ArC), 134.9 (ArC), 153.6 (4ry ArC), 181.7 (C=O); *m/z* (ES<sup>+</sup>) 301 ([M+Na]<sup>+</sup>, 100%); HRMS (ES<sup>+</sup>) C<sub>14</sub>H<sub>9</sub>F<sub>3</sub>N<sub>2</sub>NaO<sup>+</sup> ([M+Na]<sup>+</sup>) requires 301.0565; found 301.0566 (+0.4 ppm).

**(E)-((4-methoxyphenyl)diazenyl)(4-(trifluoromethyl)phenyl)methanone**

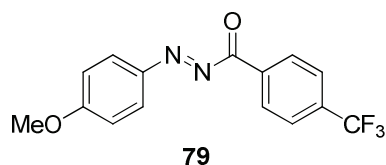

Following general procedure C, hydrazide **59** (3.50 g, 11.3 mmol), pyridine (1.02 mL, 12.4 mmol) and *N*-bromosuccinimide (2.00 g, 11.3 mmol) in CH<sub>2</sub>Cl<sub>2</sub> (50 mL) gave, after chromatographic purification (eluent Et<sub>2</sub>O:petrol 20:80), diazene **79** as a red solid (2.57 g, 74%) mp 56-58 °C;  $\nu_{\max}$  (KBr) 2936 (C-H), 1696 (C=O), 1597, 1504;  $\delta_{\text{H}}$  (300 MHz, CDCl<sub>3</sub>) 3.97 (3H, s, CH<sub>3</sub>), 7.07-7.11 (2H, m, ArH), 7.82 (2H, d, *J* 8.2, ArH), 8.04-8.10 (2H, m, ArH), 8.29 (2H, d, *J* 8.1, ArH);  $\delta_{\text{C}}$  (100 MHz, CDCl<sub>3</sub>) 55.8 (CH<sub>3</sub>), 114.7 (ArC), 123.5 (q, *J* 271, CF<sub>3</sub>), 125.8 (q, *J* 3.6, ArC), 126.6 (ArC), 131.0 (ArC), 134.9 (4ry ArC), 135.3 (q, *J* 32.7, 4ry ArC), 146.8 (4ry ArC), 164.8 (4ry ArC), 179.9 (C=O); *m/z* (ES<sup>+</sup>) 331 ([M+Na]<sup>+</sup>, 100%); HRMS (ES<sup>+</sup>) C<sub>15</sub>H<sub>11</sub>N<sub>2</sub>NaO<sub>2</sub>F<sub>3</sub><sup>+</sup> ([M+Na]<sup>+</sup>) requires 331.0670; found 331.0675 (+1.4 ppm).

**Isothiourea catalysts used**

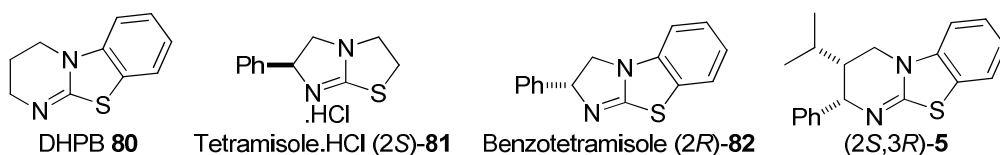

**Optimization studies on compound 3**

**triphenyl-4H-1,3,4-oxadiazin-6(5H)-one**

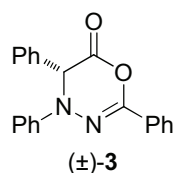

Following general procedure D, phenylacetic acid (54.5 mg, 0.40 mmol), DIPEA (104  $\mu$ L, 0.60 mmol) and *p*-methoxybenzoyl chloride (102 mg, 0.60 mmol) in DCM (2 mL), diazene **60** (42.0 mg, 0.20 mmol), DHPB **80** (7.60 mg, 0.04 mmol) and DIPEA (52  $\mu$ L, 0.3 mmol) for 1 h at rt gave, after chromatographic purification (eluent Et<sub>2</sub>O:petrol 2:98) ( $\pm$ )-**3** as a colourless oil (41.0 mg, 63%);  $\nu_{\max}$  (thin film) 3063, 2977 (C-H), 1791 (C=O), 1596, 1495;  $\delta_{\text{H}}$  (400 MHz, CDCl<sub>3</sub>) 5.96 (1H, s, C(5)H), 6.89-6.92 (1H, m, ArH), 7.15-7.28 (9H, m, ArH), 7.31-7.34 (3H, m, ArH), 7.86-7.89 (2H, m, ArH);  $\delta_{\text{C}}$  (100 MHz, CDCl<sub>3</sub>) 59.5 (C(5)), 114.5 (ArC), 121.9 (ArC), 125.6 (ArC), 126.7 (ArC), 128.6 (ArC), 128.9 (4ry ArC), 129.1 (ArC), 129.4 (ArC), 129.4 (ArC), 130.3 (ArC), 131.2 (4ry ArC), 141.0 (C(2)), 144.3 (ArC), 160.4

(*C*(6));  $m/z$  (APCI<sup>+</sup>) 328 ([M]<sup>+</sup>, 12%); HRMS (APCI<sup>+</sup>) C<sub>21</sub>H<sub>16</sub>N<sub>2</sub>O<sub>2</sub><sup>+</sup> ([M]<sup>+</sup>) requires 328.1206; found 328.1201 (-1.6 ppm).

*Asymmetric Catalyst Screen:*

Tetramisole hydrochloride (*2S*)-**81** (4.82 mg, 0.02 mmol, 10 mol%) gave approximately 65% conversion to the desired product after 16 h at rt.

Benzotetramisole (*2R*)-**82** (5.04 mg, 0.02 mmol, 10 mol%) gave approximately 20% conversion to the desired product after 16 h at rt.

Ph/*i*-Pr isothiourea catalyst (*2S,3R*)-**5** (6.17 mg, 0.02 mmol, 10 mol%) gave full conversion to the desired product after 1 h at rt. Chromatographic purification (eluent Et<sub>2</sub>O:petrol 2:98) gave (*5R*)-**3** as a colourless oil (43.0 mg, 66%); Chiral HPLC Chiralpak AD-H (5% IPA:hexane, flow rate 1 mL min<sup>-1</sup>, 211 nm, 20 °C)  $t_R$ (*5S*): 8.9 min,  $t_R$ (*5R*): 14.6 min, 95% *ee*.

*Temperature Screen:*

All reactions with Ph/*i*-Pr isothiourea catalyst (*2S,3R*)-**5** (6.17 mg, 0.02 mmol, 10 mol%)

Reaction for 2 h at 0 °C gave, after chromatographic purification (eluent Et<sub>2</sub>O:petrol 2:98) (*5R*)-**3** as a colourless oil (42.3 mg, 65%); Chiral HPLC Chiralpak AD-H (5% IPA:hexane, flow rate 1 mL min<sup>-1</sup>, 211 nm, 20 °C)  $t_R$ (*5S*): 8.8 min,  $t_R$ (*5R*): 14.4 min, 98% *ee*.

Reaction for 16 h at -30 °C gave, after chromatographic purification (eluent Et<sub>2</sub>O:petrol 2:98) (*5R*)-**3** as a colourless oil (39.7 mg, 61%); Chiral HPLC Chiralpak AD-H (5% IPA:hexane, flow rate 1 mL min<sup>-1</sup>, 211 nm, 20 °C)  $t_R$ (*5S*): 8.8 min,  $t_R$ (*5R*): 14.5 min, 99% *ee*.

Reaction for 16 h at -78 °C gave, after chromatographic purification (eluent Et<sub>2</sub>O:petrol 2:98) (*5R*)-**3** as a colourless oil (53.2 mg, 81%); Chiral HPLC Chiralpak AD-H (5% IPA:hexane, flow rate 1 mL min<sup>-1</sup>, 211 nm, 20 °C)  $t_R$ (*5S*): 9.0 min,  $t_R$ (*5R*): 14.8 min, 99% *ee*.

*Catalyst Loading Screen:*

All reactions at -78 °C for 16 h.

Ph/*i*-Pr isothiourea catalyst (*2S,3R*)-**5** (3.09 mg, 0.01 mmol, 5 mol%) gave, after chromatographic purification (eluent Et<sub>2</sub>O:petrol 2:98) (*5R*)-**3** as a colourless oil (54.3 mg,

83%); Chiral HPLC Chiralpak AD-H (5% IPA:hexane, flow rate 1 mL min<sup>-1</sup>, 211 nm, 20 °C)  $t_R(5S)$ : 8.8 min,  $t_R(5R)$ : 15.2 min, >99% *ee*.

Ph/*i*-Pr isothiourea catalyst (2*S*,3*R*)-**5** (1.23 mg, 0.004 mmol, 1 mol%) gave, after chromatographic purification (eluent Et<sub>2</sub>O:petrol 2:98) (5*R*)-**3** as a colourless oil (58.6 mg, 89%);  $[\alpha]_D^{20}$  -621.7 (*c* 1.075, CH<sub>2</sub>Cl<sub>2</sub>); Chiral HPLC Chiralpak AD-H (5% IPA:hexane, flow rate 1 mL min<sup>-1</sup>, 211 nm, 20 °C)  $t_R(5S)$ : 8.8 min,  $t_R(5R)$ : 14.8 min, >99% *ee*.

### Optimal asymmetric reaction conditions for compound 3

#### (*R*)-2,4,5-triphenyl-4*H*-1,3,4-oxadiazin-6(5*H*)-one

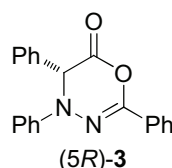

Following general procedure E, phenylacetic acid (40.8 mg, 0.30 mmol), DIPEA (78 μL, 0.45 mmol) and *p*-methoxybenzoyl chloride (77 mg, 0.45 mmol) in DCM (2 mL), Ph/*i*-Pr isothiourea catalyst (2*S*,3*R*)-**5** (0.62 mg, 0.002 mmol, 1 mol%), diazene **60** (42.0 mg, 0.20 mmol) and DIPEA (52 μL, 0.3 mmol) for 16 h at -78 °C gave, after chromatographic purification (eluent Et<sub>2</sub>O:petrol 2:98) (5*R*)-**3** as a colourless oil (57.0 mg, 87%);  $[\alpha]_D^{20}$  -621.7 (*c* 1.075, CH<sub>2</sub>Cl<sub>2</sub>); Chiral HPLC Chiralpak AD-H (5% IPA:hexane, flow rate 1 mL min<sup>-1</sup>, 211 nm, 20 °C)  $t_R(5S)$ : 8.8 min,  $t_R(5R)$ : 14.8 min, >99% *ee*.

#### methyl 2-(2-benzoyl-1-phenylhydrazinyl)-2-phenylacetate

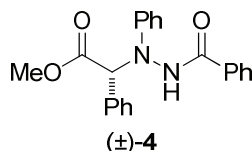

Following general procedure D, phenylacetic acid (40.9 mg, 0.30 mmol), DIPEA (78 μL, 0.45 mmol) and benzoyl chloride (52 μL, 0.45 mmol) in DCM (2 mL), diazene **60** (42.0 mg, 0.20 mmol), DHPB **80** (7.60 mg, 0.04 mmol) and DIPEA (52 μL, 0.3 mmol) for 1 h at rt followed by addition of MeOH (2 mL) and stirring for 1 h at rt gave, after chromatographic purification (eluent EtOAc:petrol 25:75) a rotameric mixture (ratio 91:9) of (±)-**4** as a white solid (67.8 mg, 94%); mp 148-150 °C;  $\nu_{\max}$  (KBr) 3355 (N-H), 3075, 2950 (C-H), 1729 (C=O), 1687 (C=O), 1599; Data for major rotamer  $\delta_H$  (300 MHz, CDCl<sub>3</sub>) 3.74 (3H, s, CH<sub>3</sub>), 5.82 (1H, s, C(2)H), 6.90-6.96 (3H, m, ArH), 7.18-7.31 (7H, m, ArH), 7.36-7.42 (3H, m, ArH), 7.44-7.48 (2H, m, ArH), 8.43 (1H, s, NH); Selected data for minor rotamer  $\delta_H$  (300 MHz, CDCl<sub>3</sub>) 3.62 (3H, s, CH<sub>3</sub>), 5.50 (1H, s, C(2)H), 7.90 (1H, s, NH); Data for major rotamer  $\delta_C$  (100 MHz,

CDCl<sub>3</sub>) 52.5 (CH<sub>3</sub>), 66.7 (C(2)), 114.8 (ArC), 121.7 (ArC), 127.0 (ArC), 128.6 (ArC), 128.6 (ArC), 128.9 (ArC), 129.1 (ArC), 129.5 (ArC), 131.8 (ArC), 133.0 (4ry ArC), 133.3 (4ry ArC), 148.4 (4ry ArC), 166.6 (C=O), 173.1 (C=O); Selected data for minor rotamer δ<sub>C</sub> (100 MHz, CDCl<sub>3</sub>) 52.4 (CH<sub>3</sub>), 68.0 (C(2)), 115.4 (ArC), 122.3 (ArC), 127.8 (ArC), 129.9 (ArC), 130.2 (ArC), 130.4 (ArC); *m/z* (NSI<sup>+</sup>) 361 ([M+H]<sup>+</sup>, 100%); HRMS (NSI<sup>+</sup>) C<sub>22</sub>H<sub>21</sub>N<sub>2</sub>O<sub>3</sub><sup>+</sup> ([M+H]<sup>+</sup>) requires 361.1547; found 361.1546 (-0.2 ppm).

### (R)-methyl 2-(2-benzoyl-1-phenylhydrazinyl)-2-phenylacetate

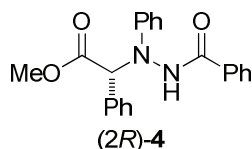

Following general procedure E, phenylacetic acid (40.9 mg, 0.30 mmol), DIPEA (78 μL, 0.45 mmol) and benzoyl chloride (52.2 μL, 0.45 mmol) in DCM (2 mL), Ph/*i*-Pr isothiurea catalyst (2*S*,3*R*)-5 (0.62 mg, 0.002 mmol, 1 mol%), diazene **60** (42.0 mg, 0.20 mmol) and DIPEA (52 μL, 0.3 mmol) for 16 h at -78 °C followed by addition of MeOH (2 mL) and stirring for 1 h at rt gave, after chromatographic purification (eluent EtOAc:petrol 25:75) a rotameric mixture (ratio 91:9) of (2*R*)-4 as a white solid (67.8 mg, 94%); [α]<sub>D</sub><sup>20</sup> -37.6 (*c* 0.5, CH<sub>2</sub>Cl<sub>2</sub>); Chiral HPLC Chiralpak IB (10% IPA:hexane, flow rate 1 mL min<sup>-1</sup>, 211 nm, 20 °C) *t*<sub>R</sub>(2*S*): 12.7 min, *t*<sub>R</sub>(2*R*): 15.0 min, 99% *ee*.

The same procedure using Ph/*i*-Pr isothiurea catalyst (2*S*,3*R*)-5 (0.31 mg, 0.001 mmol, 0.5 mol%) for 16 h at -78 °C gave (2*R*)-4 as a white solid (61.0 mg, 85%), >99% *ee*.

The same procedure using Ph/*i*-Pr isothiurea catalyst (2*S*,3*R*)-5 (0.16 mg, 0.0005 mmol, 0.25 mol%) for 40 h at -78 °C gave (2*R*)-4 as a white solid (60.0 mg, 83%), >99% *ee*.

The same procedure using Ph/*i*-Pr isothiurea catalyst (2*S*,3*R*)-5 (0.062 mg, 0.0002 mmol, 0.1 mol%) for 40 h at -78 °C gave (2*R*)-4 as a white solid (43.0 mg, 60%), 99% *ee*. The conversion was determined to be 65% by analysis of the crude <sup>1</sup>H NMR.

### 2,4-diphenyl-5-(*p*-tolyl)-4H-1,3,4-oxadiazin-6(5H)-one

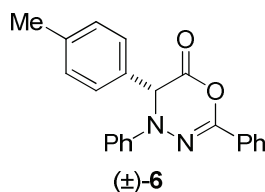

Following general procedure D, p-tolylacetic acid (45.1 mg, 0.30 mmol), DIPEA (78  $\mu$ L, 0.45 mmol) and p-methoxybenzoyl chloride (77 mg, 0.45 mmol) in DCM (2 mL), diazene **60** (42.0 mg, 0.20 mmol), DHPB **80** (7.60 mg, 0.04 mmol) and DIPEA (52  $\mu$ L, 0.3 mmol) for 1 h at rt gave, after chromatographic purification (eluent Et<sub>2</sub>O:petrol 1:99) ( $\pm$ )-**6** as a white solid (45.1 mg, 66%); mp 120-122 °C;  $\nu_{\max}$  (KBr) 3059, 2931 (C-H), 1789 (C=O), 1597, 1494;  $\delta_{\text{H}}$  (400 MHz, CDCl<sub>3</sub>) 2.18 (3H, s, CH<sub>3</sub>), 5.92 (1H, s, C(5)H), 6.89-6.93 (1H, m, ArH), 7.01 (2H, d, J 8.1, ArH), 7.13-7.18 (4H, m, ArH), 7.21-7.25 (2H, m, ArH), 7.31-7.35 (3H, m, ArH), 7.85-7.90 (2H, m, ArH);  $\delta_{\text{C}}$  (100 MHz, CDCl<sub>3</sub>) 21.1 (CH<sub>3</sub>), 59.3 (C(5)), 114.5 (ArC), 121.8 (ArC), 125.6 (ArC), 126.6 (ArC), 128.1 (4ry ArC), 128.6 (ArC), 128.9 (4ry ArC), 129.4 (ArC), 130.0 (ArC), 130.2 (ArC), 139.0 (4ry ArC), 140.9 (C(2)), 144.4 (4ry ArC), 160.6 (C(6));  $m/z$  (APCI<sup>+</sup>) 343 ([M+H]<sup>+</sup>, 23%); HRMS (APCI<sup>+</sup>) C<sub>22</sub>H<sub>19</sub>N<sub>2</sub>O<sub>2</sub><sup>+</sup> ([M+H]<sup>+</sup>) requires 343.1441; found 343.1438 (-0.9 ppm).

#### (R)-2,4-diphenyl-5-(p-tolyl)-4H-1,3,4-oxadiazin-6(5H)-one

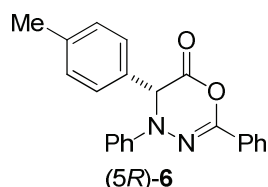

Following general procedure E, p-tolylacetic acid (45.1 mg, 0.30 mmol), DIPEA (78  $\mu$ L, 0.45 mmol) and p-methoxybenzoyl chloride (77 mg, 0.45 mmol) in DCM (2 mL), Ph/*i*-Pr isothioureia catalyst (2*S*,3*R*)-**5** (0.62 mg, 0.002 mmol, 1 mol%), diazene **60** (42.0 mg, 0.20 mmol) and DIPEA (52  $\mu$ L, 0.3 mmol) for 16 h at -78 °C gave, after chromatographic purification (eluent Et<sub>2</sub>O:petrol 1:99) (5*R*)-**6** as a white solid (53.3 mg, 78%);  $[\alpha]_{\text{D}}^{20}$  -603.3 (*c* 0.75, CH<sub>2</sub>Cl<sub>2</sub>); Chiral HPLC Chiralpak AD-H (5% IPA:hexane, flow rate 1 mL min<sup>-1</sup>, 211 nm, 20 °C)  $t_{\text{R}}$ (5*S*): 8.7 min,  $t_{\text{R}}$ (5*R*): 20.2 min, >99% *ee*.

#### 5-(4-bromophenyl)-2,4-diphenyl-4H-1,3,4-oxadiazin-6(5H)-one

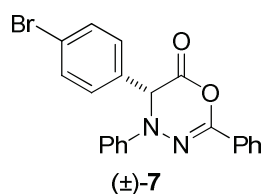

Following general procedure E, p-bromophenylacetic acid (64.5 mg, 0.30 mmol), DIPEA (78  $\mu$ L, 0.45 mmol) and p-methoxybenzoyl chloride (77 mg, 0.45 mmol) in DCM (2 mL), diazene **60** (42.0 mg, 0.20 mmol), DHPB **80** (7.60 mg, 0.04 mmol) and DIPEA (52  $\mu$ L, 0.3 mmol) for 1 h at rt gave, after chromatographic purification (eluent Et<sub>2</sub>O:petrol 1:99) ( $\pm$ )-**7** as a white solid (41.2 mg, 51%); mp 38-40 °C;  $\nu_{\max}$  (KBr) 3060, 2934 (C-H), 1789 (C=O), 1597,



1486;  $\delta_{\text{H}}$  (300 MHz,  $\text{CDCl}_3$ ) 5.92 (1H, s, C(5)H), 6.92-6.97 (1H, m, ArH), 7.13-7.18 (4H, m, ArH), 7.22-7.28 (2H, m, ArH), 7.33-7.37 (5H, m, ArH), 7.86-7.89 (2H, m, ArH);  $\delta_{\text{C}}$  (100 MHz,  $\text{CDCl}_3$ ) 59.1 (C(5)), 114.5 (ArC), 122.1 (ArC), 123.4 (4ry ArC), 125.6 (ArC), 128.4 (ArC), 128.6 (4ry ArC), 128.6 (ArC), 129.5 (ArC), 130.2 (4ry ArC), 130.5 (ArC), 132.5 (ArC), 141.2 (C(2)), 144.0 (4ry ArC), 160.0 (C(6));  $m/z$  ( $\text{NSI}^+$ ) 439 ( $[\text{M}+\text{CH}_3\text{O}]^+$ , 95%); HRMS ( $\text{NSI}^+$ )  $\text{C}_{22}\text{H}_{20}^{79}\text{BrN}_2\text{O}_3^+$  ( $[\text{M}+\text{CH}_3\text{O}]^+$ ) requires 439.0652; found 439.0655 (+0.7 ppm).

**(R)-5-(4-bromophenyl)-2,4-diphenyl-4H-1,3,4-oxadiazin-6(5H)-one**

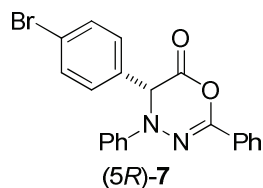

Following general procedure E, p-bromophenylacetic acid (64.5 mg, 0.30 mmol), DIPEA (78  $\mu\text{L}$ , 0.45 mmol) and p-methoxybenzoyl chloride (77 mg, 0.45 mmol) in DCM (2 mL), Ph/*i*-Pr isothiourea catalyst (2*S*,3*R*)-5 (0.62 mg, 0.002 mmol, 1 mol%), diazene **60** (42.0 mg, 0.20 mmol) and DIPEA (52  $\mu\text{L}$ , 0.3 mmol) for 16 h at  $-78\text{ }^\circ\text{C}$  gave, after chromatographic purification (eluent  $\text{Et}_2\text{O}$ :petrol 1:99) (5*R*)-7 as a white solid (64.9 mg, 80%);  $[\alpha]_{\text{D}}^{20}$   $-572.0$  ( $c$  0.50,  $\text{CH}_2\text{Cl}_2$ ); Chiral HPLC Chiralpak AD-H (5% IPA:hexane, flow rate 1 mL  $\text{min}^{-1}$ , 211 nm,  $20\text{ }^\circ\text{C}$ )  $t_{\text{R}}(5*S*)$ : 10.1 min,  $t_{\text{R}}(5*R*)$ : 19.0 min, 99% *ee*.

**5-(4-chlorophenyl)-2,4-diphenyl-4H-1,3,4-oxadiazin-6(5H)-one**

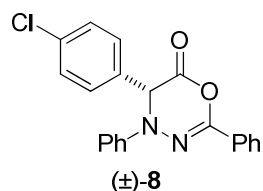

Following general procedure D, p-chlorophenylacetic acid (51.2 mg, 0.30 mmol), DIPEA (78  $\mu\text{L}$ , 0.45 mmol) and p-methoxybenzoyl chloride (77 mg, 0.45 mmol) in DCM (2 mL), diazene **60** (42.0 mg, 0.20 mmol), DHPB **80** (7.60 mg, 0.04 mmol) and DIPEA (52  $\mu\text{L}$ , 0.3 mmol) for 1 h at rt gave, after chromatographic purification (eluent  $\text{Et}_2\text{O}$ :petrol 1:99) (±)-8 as a white solid (38.9 mg, 54%); mp  $40\text{-}42\text{ }^\circ\text{C}$ ;  $\nu_{\text{max}}$  (KBr) 2933 (C-H), 1790 (C=O), 1598, 1490;  $\delta_{\text{H}}$  (300 MHz,  $\text{CDCl}_3$ ) 5.93 (1H, s, C(5)H), 6.93 (1H, t,  $J$  7.2, ArH), 7.13-7.28 (8H, m, ArH), 7.30-7.38 (3H, m, ArH), 7.84-7.90 (2H, m, ArH);  $\delta_{\text{C}}$  (100 MHz,  $\text{CDCl}_3$ ) 59.0 (C(5)), 114.5 (ArC), 122.1 (ArC), 125.6 (ArC), 128.1 (ArC), 128.6 (4ry ArC), 128.6 (ArC), 129.5 (ArC), 129.6 (ArC), 129.6 (4ry ArC), 130.5 (ArC), 135.2 (4ry ArC), 141.2 (C(2)), 144.1 (4ry ArC), 160.1 (C(6));  $m/z$  ( $\text{NSI}^+$ ) 395 ( $[\text{M}+\text{CH}_3\text{O}]^+$ , 100%); HRMS ( $\text{NSI}^+$ )  $\text{C}_{22}\text{H}_{20}^{35}\text{ClN}_2\text{O}_3^+$  ( $[\text{M}+\text{CH}_3\text{O}]^+$ ) requires 395.1157; found 395.1157 (+0.0 ppm).



**(R)-5-(4-chlorophenyl)-2,4-diphenyl-4H-1,3,4-oxadiazin-6(5H)-one**

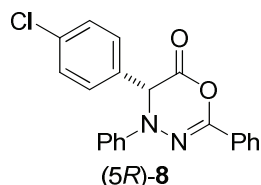

Following general procedure E, p-chlorophenylacetic acid (51.2 mg, 0.30 mmol), DIPEA (78  $\mu\text{L}$ , 0.45 mmol) and p-methoxybenzoyl chloride (77 mg, 0.45 mmol) in DCM (2 mL), Ph/*i*-Pr isothioureia catalyst (2*S*,3*R*)-5 (0.62 mg, 0.002 mmol, 1 mol%), diazene **60** (42.0 mg, 0.20 mmol) and DIPEA (52  $\mu\text{L}$ , 0.3 mmol) for 16 h at  $-78\text{ }^\circ\text{C}$  gave, after chromatographic purification (eluent  $\text{Et}_2\text{O}$ :petrol 1:99) (5*R*)-**8** as a white solid (47.8 mg, 66%);  $[\alpha]_{\text{D}}^{20} -613.5$  ( $c$  0.2,  $\text{CH}_2\text{Cl}_2$ ); Chiral HPLC Chiralpak AD-H (5% IPA:hexane, flow rate  $1\text{ mL min}^{-1}$ , 211 nm,  $20\text{ }^\circ\text{C}$ )  $t_{\text{R}}(5\text{S})$ : 9.2 min,  $t_{\text{R}}(5\text{R})$ : 16.9 min, >99% *ee*.

**5-(4-fluorophenyl)-2,4-diphenyl-4H-1,3,4-oxadiazin-6(5H)-one**

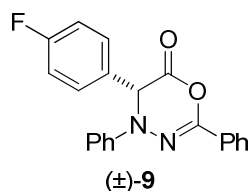

Following general procedure D, p-fluorophenylacetic acid (46.2 mg, 0.30 mmol), DIPEA (78  $\mu\text{L}$ , 0.45 mmol) and p-methoxybenzoyl chloride (77 mg, 0.45 mmol) in DCM (2 mL), diazene **60** (42.0 mg, 0.20 mmol), DHPB **80** (7.60 mg, 0.04 mmol) and DIPEA (52  $\mu\text{L}$ , 0.3 mmol) for 1 h at rt gave, after chromatographic purification (eluent  $\text{Et}_2\text{O}$ :petrol 1.5:98.5) (±)-**9** as a colourless oil (37.2 mg, 54%);  $\nu_{\text{max}}$  (thin film) 3063, 2928 (C-H), 1791 (C=O), 1597, 1506;  $\delta_{\text{H}}$  (400 MHz,  $\text{CDCl}_3$ ) 5.94 (1H, s, C(5)H), 6.89-6.96 (3H, m, ArH), 7.15-7.28 (2H, m, ArH), 7.23-7.27 (4H, m, ArH), 7.33-7.37 (3H, m, ArH), 7.87-7.90 (2H, m, ArH);  $\delta_{\text{C}}$  (100 MHz,  $\text{CDCl}_3$ ) 58.9 (C(5)), 114.5 (ArC), 116.4 (d,  $J$  21.8, ArC), 122.0 (ArC), 125.6 (ArC), 126.9 (d,  $J$  3.0, 4ry ArC), 128.5 (ArC), 128.6 (ArC), 128.7 (4ry ArC), 129.4 (ArC), 130.4 (ArC), 141.1 (C(2)), 144.1 (4ry ArC), 160.3 (C(6)), 163.1 (d,  $J$  247, 4ry ArC);  $m/z$  (NSI<sup>+</sup>) 379 ( $[\text{M}+\text{CH}_5\text{O}]^+$ , 100%); HRMS (NSI<sup>+</sup>)  $\text{C}_{22}\text{H}_{20}\text{FN}_2\text{O}_3^+$  ( $[\text{M}+\text{CH}_5\text{O}]^+$ ) requires 379.1452; found 379.1454 (+0.4 ppm).

**(R)-5-(4-fluorophenyl)-2,4-diphenyl-4H-1,3,4-oxadiazin-6(5H)-one**

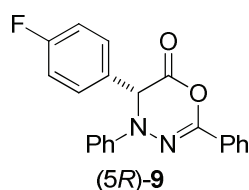

Following general procedure E, p-fluorophenylacetic acid (46.2 mg, 0.30 mmol), DIPEA (78  $\mu$ L, 0.45 mmol) and p-methoxybenzoyl chloride (77 mg, 0.45 mmol) in DCM (2 mL), Ph/*i*-Pr isothiourea catalyst (2*S*,3*R*)-**5** (0.62 mg, 0.002 mmol, 1 mol%), diazene **60** (42.0 mg, 0.20 mmol) and DIPEA (52  $\mu$ L, 0.3 mmol) for 16 h at -78 °C gave, after chromatographic purification (eluent Et<sub>2</sub>O:petrol 1.5:98.5) (5*R*)-**9** as a colourless oil (53.6 mg, 77%);  $[\alpha]_D^{20}$  -634.2 (*c* 0.5, CH<sub>2</sub>Cl<sub>2</sub>); Chiral HPLC Chiralpak AD-H (5% IPA:hexane, flow rate 1 mL min<sup>-1</sup>, 211 nm, 20 °C)  $t_R$ (5*S*): 8.5 min,  $t_R$ (5*R*): 12.7 min, >99% *ee*.

#### 5-([1,1'-biphenyl]-4-yl)-2,4-diphenyl-4H-1,3,4-oxadiazin-6(5H)-one

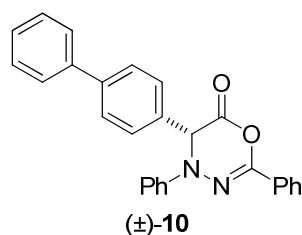

Following general procedure D, biphenylacetic acid (63.6 mg, 0.30 mmol), DIPEA (78  $\mu$ L, 0.45 mmol) and p-methoxybenzoyl chloride (77 mg, 0.45 mmol) in DCM (2 mL), diazene **60** (42.0 mg, 0.20 mmol), DHPB **80** (7.60 mg, 0.04 mmol) and DIPEA (52  $\mu$ L, 0.3 mmol) for 1 h at rt gave, after chromatographic purification (eluent Et<sub>2</sub>O:petrol 1:99) (±)-**10** as a white solid (40.3 mg, 53%); mp 39-41 °C;  $\nu_{\max}$  (KBr) 3059, 2925 (C-H), 1790 (C=O), 1597, 1494;  $\delta_H$  (400 MHz, CDCl<sub>3</sub>) 6.01 (1H, s, C(5)*H*), 6.92-6.96 (1H, m, *ArH*), 7.20-7.37 (12H, m, *ArH*), 7.40-7.44 (4H, m, *ArH*), 7.90-7.92 (2H, m, *ArH*);  $\delta_C$  (100 MHz, CDCl<sub>3</sub>) 59.3 (C(5)), 114.5 (*ArC*), 121.9 (*ArC*), 125.6 (*ArC*), 127.1 (*ArC*), 127.1 (*ArC*), 127.7 (*ArC*), 128.1 (*ArC*), 128.6 (*ArC*), 128.6 (4ry *ArC*), 128.8 (*ArC*), 129.4 (*ArC*), 130.1 (4ry *ArC*), 130.3 (*ArC*), 140.1 (4ry *ArC*), 141.1 (C(2)), 142.0 (4ry *ArC*), 144.3 (4ry *ArC*), 160.4 (C(6));  $m/z$  (APCI<sup>+</sup>) 405 ([M+H]<sup>+</sup>, 100%); HRMS (APCI<sup>+</sup>) C<sub>27</sub>H<sub>21</sub>N<sub>2</sub>O<sub>2</sub><sup>+</sup> ([M+H]<sup>+</sup>) requires 405.1598; found 405.1591 (-1.6 ppm).

#### (R)-5-([1,1'-biphenyl]-4-yl)-2,4-diphenyl-4H-1,3,4-oxadiazin-6(5H)-one

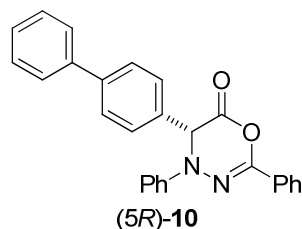

Following general procedure E, biphenylacetic acid (63.6 mg, 0.30 mmol), DIPEA (78  $\mu$ L, 0.45 mmol) and p-methoxybenzoyl chloride (77 mg, 0.45 mmol) in DCM (2 mL), Ph/*i*-Pr isothiourea catalyst (2*S*,3*R*)-**5** (0.62 mg, 0.002 mmol, 1 mol%), diazene **60** (42.0 mg, 0.20

mmol) and DIPEA (52  $\mu$ L, 0.3 mmol) for 16 h at  $-78$   $^{\circ}$ C gave, after chromatographic purification (eluent Et<sub>2</sub>O:petrol 1:99) (5*R*)-**10** as a white solid (70.8 mg, 88%);  $[\alpha]_{\text{D}}^{20}$   $-532.2$  ( $c$  0.5, CH<sub>2</sub>Cl<sub>2</sub>); Chiral HPLC Chiralpak AD-H (5% IPA:hexane, flow rate 1 mL min<sup>-1</sup>, 211 nm, 20  $^{\circ}$ C)  $t_{\text{R}}(5\text{S})$ : 13.5 min,  $t_{\text{R}}(5\text{R})$ : 16.7 min, 98% *ee*.

#### 2,4-diphenyl-5-(*m*-tolyl)-4H-1,3,4-oxadiazin-6(5H)-one

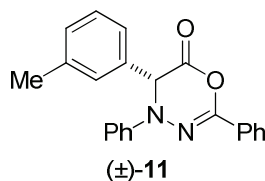

Following general procedure D, *m*-tolylacetic acid (45.1 mg, 0.30 mmol), DIPEA (78  $\mu$ L, 0.45 mmol) and *p*-methoxybenzoyl chloride (77 mg, 0.45 mmol) in DCM (2 mL), diazene **60** (42.0 mg, 0.20 mmol), DHPB **80** (7.60 mg, 0.04 mmol) and DIPEA (52  $\mu$ L, 0.3 mmol) for 1 h at rt gave, after chromatographic purification (eluent Et<sub>2</sub>O:petrol 1:99) (±)-**11** as a white solid (44.8 mg, 65%); mp 130-132  $^{\circ}$ C;  $\nu_{\text{max}}$  (KBr) 3030, 2926 (C-H), 1789 (C=O), 1597, 1494;  $\delta_{\text{H}}$  (400 MHz, CDCl<sub>3</sub>) 2.19 (3H, s, CH<sub>3</sub>), 5.91 (1H, s, C(5)*H*), 6.91 (1H, tt,  $J$  7.2, 1.1, Ar*H*), 7.00-7.03 (2H, m, Ar*H*), 7.06-7.11 (2H, m, Ar*H*), 7.14-7.17 (2H, m, Ar*H*), 7.21-7.26 (2H, m, Ar*H*), 7.31-7.35 (3H, m, Ar*H*), 7.86-7.90 (2H, m, Ar*H*);  $\delta_{\text{C}}$  (100 MHz, CDCl<sub>3</sub>) 21.5 (CH<sub>3</sub>), 59.5 (C(5)), 114.5 (ArC), 121.8 (ArC), 123.6 (ArC), 125.6 (ArC), 127.2 (ArC), 128.6 (ArC), 128.9 (4ry ArC), 129.2 (ArC), 129.4 (ArC), 129.9 (ArC), 130.2 (ArC), 131.2 (4ry ArC), 139.3 (4ry ArC), 140.9 (C(2)), 144.3 (4ry ArC), 160.5 (C(6));  $m/z$  (APCI<sup>+</sup>) 343 ([M+H]<sup>+</sup>, 92%); HRMS (APCI<sup>+</sup>) C<sub>22</sub>H<sub>19</sub>N<sub>2</sub>O<sub>2</sub><sup>+</sup> ([M+H]<sup>+</sup>) requires 343.1441; found 343.1438 (-0.9 ppm).

#### (*R*)-2,4-diphenyl-5-(*m*-tolyl)-4H-1,3,4-oxadiazin-6(5H)-one

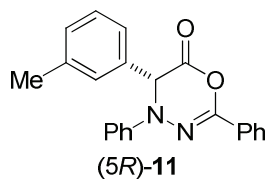

Following general procedure E, *m*-tolylacetic acid (45.1 mg, 0.30 mmol), DIPEA (78  $\mu$ L, 0.45 mmol) and *p*-methoxybenzoyl chloride (77 mg, 0.45 mmol) in DCM (2 mL), Ph/*i*-Pr isothiourea catalyst (2*S*,3*R*)-**5** (0.62 mg, 0.002 mmol, 1 mol%), diazene **60** (42.0 mg, 0.20 mmol) and DIPEA (52  $\mu$ L, 0.3 mmol) for 16 h at  $-78$   $^{\circ}$ C gave, after chromatographic purification (eluent Et<sub>2</sub>O:petrol 1:99) (5*R*)-**11** as a white solid (53.8 mg, 79%);  $[\alpha]_{\text{D}}^{20}$   $-651.6$  ( $c$  0.25, CH<sub>2</sub>Cl<sub>2</sub>); Chiral HPLC Chiralpak AD-H (5% IPA:hexane, flow rate 1 mL min<sup>-1</sup>, 211 nm, 20  $^{\circ}$ C)  $t_{\text{R}}(5\text{S})$ : 7.7 min,  $t_{\text{R}}(5\text{R})$ : 8.9 min, >99% *ee*.

### 5-(naphthalen-2-yl)-2,4-diphenyl-4H-1,3,4-oxadiazin-6(5H)-one

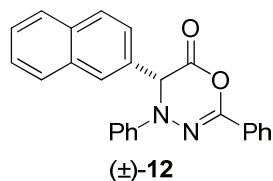

Following general procedure D, 2-naphthylacetic acid (55.9 mg, 0.30 mmol), DIPEA (78  $\mu$ L, 0.45 mmol) and p-methoxybenzoyl chloride (77 mg, 0.45 mmol) in DCM (2 mL), diazene **60** (42.0 mg, 0.20 mmol), DHPB **80** (7.60 mg, 0.04 mmol) and DIPEA (52  $\mu$ L, 0.3 mmol) for 1 h at rt gave, after chromatographic purification (eluent Et<sub>2</sub>O:petrol 1:99) (±)-**12** as a white solid (40.3 mg, 53%); mp 40–42 °C;  $\nu_{\text{max}}$  (KBr) 3058, 2935 (C-H), 1788 (C=O), 1596, 1494;  $\delta_{\text{H}}$  (400 MHz, CDCl<sub>3</sub>) 6.12 (1H, s, C(5)H), 6.90–6.94 (1H, m, ArH), 7.20–7.27 (4H, m, ArH), 7.32–7.42 (6H, m, ArH), 7.64–7.74 (4H, m, ArH), 7.88–7.91 (2H, m, ArH);  $\delta_{\text{C}}$  (100 MHz, CDCl<sub>3</sub>) 59.8 (C(5)), 114.6 (ArC), 121.9 (ArC), 123.7 (ArC), 125.6 (ArC), 126.2 (ArC), 126.7 (ArC), 126.8 (ArC), 127.7 (ArC), 128.2 (ArC), 128.6 (4ry ArC), 128.6 (ArC), 128.8 (ArC), 129.4 (ArC), 129.5 (ArC), 130.3 (ArC), 133.2 (4ry ArC), 133.4 (4ry ArC), 141.1 (C(2)), 144.3 (4ry ArC), 160.4 (C(6));  $m/z$  (APCI<sup>+</sup>) 379 ([M+H]<sup>+</sup>, 100%); HRMS (APCI<sup>+</sup>) C<sub>25</sub>H<sub>19</sub>N<sub>2</sub>O<sub>2</sub><sup>+</sup> ([M+H]<sup>+</sup>) requires 379.1441; found 379.1433 (-2.1 ppm).

### (R)-5-(naphthalen-2-yl)-2,4-diphenyl-4H-1,3,4-oxadiazin-6(5H)-one

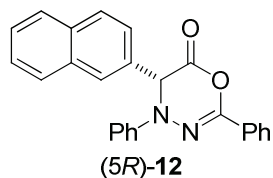

Following general procedure E, 2-naphthylacetic acid (55.9 mg, 0.30 mmol), DIPEA (78  $\mu$ L, 0.45 mmol) and p-methoxybenzoyl chloride (77 mg, 0.45 mmol) in DCM (2 mL), Ph/*i*-Pr isothiourea catalyst (2*S*,3*R*)-**5** (0.62 mg, 0.002 mmol, 1 mol%), diazene **60** (42.0 mg, 0.20 mmol) and DIPEA (52  $\mu$ L, 0.3 mmol) for 16 h at -78 °C gave, after chromatographic purification (eluent Et<sub>2</sub>O:petrol 1:99) (5*R*)-**12** as a white solid (57.6 mg, 76%);  $[\alpha]_{\text{D}}^{20}$  -540.4 (*c* 0.5, CH<sub>2</sub>Cl<sub>2</sub>); Chiral HPLC Chiralpak AD-H (5% IPA:hexane, flow rate 1 mL min<sup>-1</sup>, 211 nm, 20 °C)  $t_{\text{R}}$ (5*S*): 13.0 min,  $t_{\text{R}}$ (5*R*): 22.5 min, 99% *ee*.

### 4-(4-fluorophenyl)-2,5-diphenyl-4H-1,3,4-oxadiazin-6(5H)-one

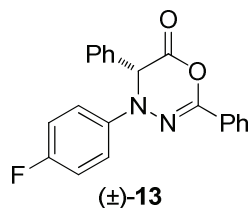

Following general procedure D, phenylacetic acid (40.9 mg, 0.30 mmol), DIPEA (78  $\mu$ L, 0.45 mmol) and p-methoxybenzoyl chloride (77 mg, 0.45 mmol) in DCM (2 mL), diazene **63** (45.4 mg, 0.20 mmol), DHPB **80** (7.60 mg, 0.04 mmol) and DIPEA (52  $\mu$ L, 0.3 mmol) for 1 h at rt gave, after chromatographic purification (eluent Et<sub>2</sub>O:petrol 1:99) ( $\pm$ )-**13** as a white solid (49.6 mg, 72%); mp 48-50 °C;  $\nu_{\max}$  (thin film) 3062, 2924 (C-H), 1791 (C=O), 1600, 1506;  $\delta_{\text{H}}$  (400 MHz, CDCl<sub>3</sub>) 5.88 (1H, s, C(5)H), 6.90-6.95 (2H, m, ArH), 7.08-7.12 (2H, m, ArH), 7.20-7.26 (5H, m, ArH), 7.31-7.35 (3H, m, ArH), 7.85-7.87 (2H, m, ArH);  $\delta_{\text{C}}$  (75 MHz, CDCl<sub>3</sub>) 59.9 (C(5)), 116.0 (d, *J* 22.6, ArC), 116.0 (d, *J* 7.7, ArC), 125.6 (ArC), 126.7 (ArC), 128.6 (ArC), 128.7 (4ry ArC), 129.2 (ArC), 129.4 (ArC), 130.4 (ArC), 131.0 (4ry ArC), 140.7 (d, *J* 2.1, 4ry ArC), 141.1 (C(2)), 158.4 (d, *J* 240, 4ry ArC), 160.3 (C(6)); *m/z* (NSI<sup>+</sup>) 379 ([M+CH<sub>5</sub>O]<sup>+</sup>, 100%); HRMS (NSI<sup>+</sup>) C<sub>22</sub>H<sub>20</sub>FN<sub>2</sub>O<sub>3</sub><sup>+</sup> ([M+CH<sub>5</sub>O]<sup>+</sup>) requires 379.1452; found 379.1450 (-0.7 ppm).

**(R)-4-(4-fluorophenyl)-2,5-diphenyl-4H-1,3,4-oxadiazin-6(5H)-one**

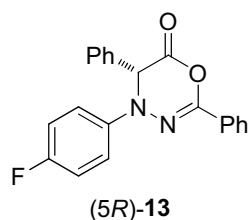

Following general procedure E, phenylacetic acid (40.9 mg, 0.30 mmol), DIPEA (78  $\mu$ L, 0.45 mmol) and p-methoxybenzoyl chloride (77 mg, 0.45 mmol) in DCM (2 mL), Ph/*i*-Pr isothiourea catalyst (2*S*,3*R*)-**5** (0.62 mg, 0.002 mmol, 1 mol%), diazene **63** (45.4 mg, 0.20 mmol) and DIPEA (52  $\mu$ L, 0.3 mmol) for 16 h at -78 °C gave, after chromatographic purification (eluent Et<sub>2</sub>O:petrol 1:99) (*5R*)-**13** as a white solid (56.7 mg, 82%); [ $\alpha$ ]<sub>D</sub><sup>20</sup> -604.2 (*c* 0.5, CH<sub>2</sub>Cl<sub>2</sub>); Chiral HPLC Chiralpak AD-H (5% IPA:hexane, flow rate 1 mL min<sup>-1</sup>, 211 nm, 20 °C) *t*<sub>R</sub>(*5S*): 11.9 min, *t*<sub>R</sub>(*5R*): 16.5 min, >99% *ee*.

**2-(4-fluorophenyl)-4,5-diphenyl-4H-1,3,4-oxadiazin-6(5H)-one**

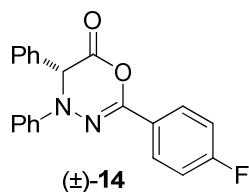

Following general procedure D, phenylacetic acid (40.9 mg, 0.30 mmol), DIPEA (78  $\mu$ L, 0.45 mmol) and p-methoxybenzoyl chloride (77 mg, 0.45 mmol) in DCM (2 mL), diazene **64** (45.4 mg, 0.20 mmol), DHPB **80** (7.60 mg, 0.04 mmol) and DIPEA (52  $\mu$ L, 0.3 mmol) for 1 h at rt gave, after chromatographic purification (eluent Et<sub>2</sub>O:petrol 1:99) ( $\pm$ )-**14** as a colourless oil

(48.5 mg, 70%);  $\nu_{\max}$  (thin film) 3064, 2920 (C-H), 1790 (C=O), 1597, 1496;  $\delta_{\text{H}}$  (300 MHz,  $\text{CDCl}_3$ ) 5.96 (1H, s, C(5)H), 6.89-6.94 (1H, m, ArH), 6.98-7.04 (2H, m, ArH), 7.13-7.17 (2H, m, ArH), 7.20-7.28 (7H, m, ArH), 7.83-7.89 (2H, m, ArH);  $\delta_{\text{C}}$  (100 MHz,  $\text{CDCl}_3$ ) 59.5 (C(5)), 114.4 (ArC), 115.8 (d,  $J$  21.9, ArC), 121.9 (ArC), 125.0 (d,  $J$  3.2, 4ry ArC), 126.6 (ArC), 127.7 (d,  $J$  8.4, ArC), 129.1 (ArC), 129.4 (ArC), 129.4 (ArC), 131.1 (4ry ArC), 140.4 (C(2)), 144.2 (4ry ArC), 160.2 (C(6)), 164.0 (d,  $J$  250, 4ry ArC);  $m/z$  (NSI<sup>+</sup>) 379 ([M+CH<sub>3</sub>O]<sup>+</sup>, 100%); HRMS (NSI<sup>+</sup>) C<sub>22</sub>H<sub>20</sub>FN<sub>2</sub>O<sub>3</sub><sup>+</sup> ([M+CH<sub>3</sub>O]<sup>+</sup>) requires 379.1452; found 379.1456 (+0.9 ppm).

#### (R)-2-(4-fluorophenyl)-4,5-diphenyl-4H-1,3,4-oxadiazin-6(5H)-one

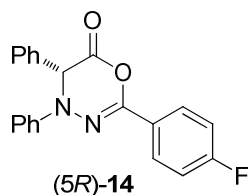

Following general procedure E, phenylacetic acid (40.9 mg, 0.30 mmol), DIPEA (78  $\mu\text{L}$ , 0.45 mmol) and p-methoxybenzoyl chloride (77 mg, 0.45 mmol) in DCM (2 mL), Ph/*i*-Pr isothiourea catalyst (2*S*,3*R*)-**5** (0.62 mg, 0.002 mmol, 1 mol%), diazene **64** (45.4 mg, 0.20 mmol) and DIPEA (52  $\mu\text{L}$ , 0.3 mmol) for 16 h at -78 °C gave, after chromatographic purification (eluent Et<sub>2</sub>O:petrol 1:99) (5*R*)-**14** as a colourless oil (60.9 mg, 88%); [ $\alpha$ ]<sub>D</sub><sup>20</sup> -609.2 ( $c$  0.5, CH<sub>2</sub>Cl<sub>2</sub>); Chiral HPLC Chiralpak AD-H (5% IPA:hexane, flow rate 1 mL min<sup>-1</sup>, 211 nm, 20 °C)  $t_{\text{R}}$ (5*S*): 9.9 min,  $t_{\text{R}}$ (5*R*): 18.6 min, 99% *ee*.

#### 2-(3-fluorophenyl)-4,5-diphenyl-4H-1,3,4-oxadiazin-6(5H)-one

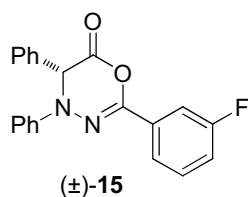

Following general procedure D, phenylacetic acid (40.9 mg, 0.30 mmol), DIPEA (78  $\mu\text{L}$ , 0.45 mmol) and p-methoxybenzoyl chloride (77 mg, 0.45 mmol) in DCM (2 mL), diazene **65** (45.4 mg, 0.20 mmol), DHPB **80** (7.60 mg, 0.04 mmol) and DIPEA (52  $\mu\text{L}$ , 0.3 mmol) for 1 h at rt gave, after chromatographic purification (eluent Et<sub>2</sub>O:petrol 1:99) (±)-**15** as a colourless oil (39.4 mg, 57%);  $\nu_{\max}$  (thin film) 3062 (C-H), 1792 (C=O), 1597, 1498;  $\delta_{\text{H}}$  (400 MHz,  $\text{CDCl}_3$ ) 5.96 (1H, s, C(5)H), 6.91-6.95 (1H, m, ArH), 7.02 (1H, tdd,  $J$  8.3, 2.6, 0.9, ArH), 7.14-7.17 (2H, m, ArH), 7.20-7.31 (8H, m, ArH), 7.56-7.59 (1H, m, ArH), 7.63-7.65 (1H, m, ArH);  $\delta_{\text{C}}$  (100 MHz,  $\text{CDCl}_3$ ) 59.5 (C(5)), 112.6 (d,  $J$  24.4, ArC), 114.6 (ArC), 117.2 (d,  $J$  21.4, ArC), 121.2 (d,  $J$  2.7, ArC), 122.2 (ArC), 126.6 (ArC), 129.2 (ArC), 129.4 (ArC), 129.4 (ArC), 130.2

(d,  $J$  8.1,  $ArC$ ), 131.0 (d,  $J$  5.6, 4ry  $ArC$ ), 131.0 (4ry  $ArC$ ), 139.9 (4ry  $ArC$ ), 144.1 (4ry  $ArC$ ), 160.0 ( $C(6)$ ), 162.9 (d,  $J$  245, 4ry  $ArC$ );  $m/z$  ( $NSI^+$ ) 379 ( $[M+CH_3O]^+$ , 100%); HRMS ( $NSI^+$ )  $C_{22}H_{20}FN_2O_3^+$  ( $[M+CH_3O]^+$ ) requires 379.1452; found 379.1456 (+0.9 ppm).

**(R)-2-(3-fluorophenyl)-4,5-diphenyl-4H-1,3,4-oxadiazin-6(5H)-one**

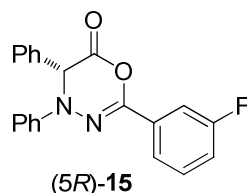

Following general procedure E, phenylacetic acid (40.9 mg, 0.30 mmol), DIPEA (78  $\mu$ L, 0.45 mmol) and p-methoxybenzoyl chloride (77 mg, 0.45 mmol) in DCM (2 mL), Ph/*i*-Pr isothioureia catalyst (2*S*,3*R*)-5 (0.62 mg, 0.002 mmol, 1 mol%), diazene **65** (45.4 mg, 0.20 mmol) and DIPEA (52  $\mu$ L, 0.3 mmol) for 16 h at  $-78$  °C gave, after chromatographic purification (eluent  $Et_2O$ :petrol 1:99) (5*R*)-15 as a colourless oil (52.5 mg, 76%);  $[\alpha]_D^{20}$  -608.0 ( $c$  0.5,  $CH_2Cl_2$ ); Chiral HPLC Chiralpak AD-H (5% IPA:hexane, flow rate 1 mL  $min^{-1}$ , 211 nm, 20 °C)  $t_R(5S)$ : 8.1 min,  $t_R(5R)$ : 10.5 min, 99% *ee*.

**2-(3-fluorophenyl)-4,5-diphenyl-4H-1,3,4-oxadiazin-6(5H)-one**

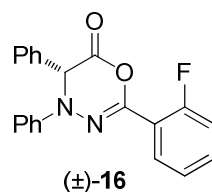

Following general procedure D, phenylacetic acid (40.9 mg, 0.30 mmol), DIPEA (78  $\mu$ L, 0.45 mmol) and p-methoxybenzoyl chloride (77 mg, 0.45 mmol) in DCM (2 mL), diazene **66** (45.4 mg, 0.20 mmol), DHPB **80** (7.60 mg, 0.04 mmol) and DIPEA (52  $\mu$ L, 0.3 mmol) for 1 h at rt gave, after chromatographic purification (eluent  $Et_2O$ :petrol 1:99) (±)-16 as a colourless oil (40.3 mg, 58%);  $\nu_{max}$  (thin film) 3064 (C-H), 2925, 1791 (C=O), 1597, 1495;  $\delta_H$  (300 MHz,  $CDCl_3$ ) 5.99 (1H, s,  $C(5)H$ ), 6.92 (1H, tt,  $J$  6.9, 1.4,  $ArH$ ), 7.04-7.12 (2H, m,  $ArH$ ), 7.16-7.34 (10H, m,  $ArH$ ), 7.69 (1H, td,  $J$  7.7, 1.7,  $ArH$ );  $\delta_C$  (75 MHz,  $CDCl_3$ ) 59.6 ( $C(5)$ ), 114.5 ( $ArC$ ), 117.0 (d,  $J$  28.8,  $ArC$ ), 117.3 (d,  $J$  12.8, 4ry  $ArC$ ), 122.1 ( $ArC$ ), 124.1 (d,  $J$  5.1,  $ArC$ ), 126.7 ( $ArC$ ), 128.7 ( $ArC$ ), 129.1 ( $ArC$ ), 129.4 ( $ArC$ ), 129.4 ( $ArC$ ), 131.1 (4ry  $ArC$ ), 131.7 (d,  $J$  11.2,  $ArC$ ), 137.7 (d,  $J$  9.1, 4ry  $ArC$ ), 144.2 (4ry  $ArC$ ), 160.2 ( $C(6)$ ), 160.3 (d,  $J$  342, 4ry  $ArC$ );  $m/z$  ( $NSI^+$ ) 379 ( $[M+CH_3O]^+$ , 100%); HRMS ( $NSI^+$ )  $C_{22}H_{20}FN_2O_3^+$  ( $[M+CH_3O]^+$ ) requires 379.1452; found 379.1456 (+0.9 ppm).

**(R)-2-(2-fluorophenyl)-4,5-diphenyl-4H-1,3,4-oxadiazin-6(5H)-one**

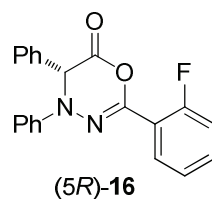

Following general procedure E, phenylacetic acid (40.9 mg, 0.30 mmol), DIPEA (78  $\mu$ L, 0.45 mmol) and p-methoxybenzoyl chloride (77 mg, 0.45 mmol) in DCM (2 mL), Ph/*i*-Pr isothiourea catalyst (2*S*,3*R*)-5 (0.62 mg, 0.002 mmol, 1 mol%), diazene **66** (45.4 mg, 0.20 mmol) and DIPEA (52  $\mu$ L, 0.3 mmol) for 16 h at -78 °C gave, after chromatographic purification (eluent Et<sub>2</sub>O:petrol 1:99) (5*R*)-**16** as a colourless oil (48.5 mg, 70%); [ $\alpha$ ]<sub>D</sub><sup>20</sup> -599.4 (*c* 0.5, CH<sub>2</sub>Cl<sub>2</sub>); Chiral HPLC Chiralpak AD-H (5% IPA:hexane, flow rate 1 mL min<sup>-1</sup>, 211 nm, 20 °C) *t*<sub>R</sub>(5*S*): 10.4 min, *t*<sub>R</sub>(5*R*): 13.0 min, 99% *ee*.

**2-(4-bromophenyl)-4,5-diphenyl-4H-1,3,4-oxadiazin-6(5H)-one**

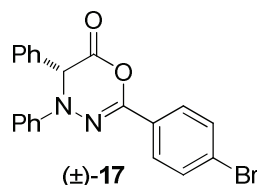

Following general procedure D, phenylacetic acid (40.9 mg, 0.30 mmol), DIPEA (78  $\mu$ L, 0.45 mmol) and p-methoxybenzoyl chloride (77 mg, 0.45 mmol) in DCM (2 mL), diazene **67** (57.8 mg, 0.20 mmol), DHPB **80** (7.60 mg, 0.04 mmol) and DIPEA (52  $\mu$ L, 0.3 mmol) for 1 h at rt gave, after chromatographic purification (eluent Et<sub>2</sub>O:petrol 1:99) (±)-**17** as a white solid (51.4 mg, 63%); mp 44-46 °C;  $\nu_{\max}$  (KBr) 3062 (C-H), 1789 (C=O), 1597, 1497;  $\delta_{\text{H}}$  (300 MHz, CDCl<sub>3</sub>) 5.95 (1H, s, C(5)*H*), 6.89-6.95 (1H, m, Ar*H*), 7.13-7.27 (9H, m, Ar*H*), 7.42-7.47 (2H, m, Ar*H*), 7.70-7.75 (2H, m, Ar*H*);  $\delta_{\text{C}}$  (100 MHz, CDCl<sub>3</sub>) 59.5 (C(5)), 114.5 (ArC), 122.1 (ArC), 124.7 (4ry ArC), 126.6 (ArC), 127.0 (ArC), 127.8 (4ry ArC), 129.2 (ArC), 129.4 (ArC), 129.4 (ArC), 131.0 (4ry ArC), 131.8 (ArC), 140.3 (C(2)), 144.1 (4ry ArC), 160.1 (C(6)); *m/z* (NSI<sup>+</sup>) 439 ([M+CH<sub>3</sub>O]<sup>+</sup>, 100%); HRMS (NSI<sup>+</sup>) C<sub>22</sub>H<sub>20</sub><sup>79</sup>BrN<sub>2</sub>O<sub>3</sub><sup>+</sup> ([M+CH<sub>3</sub>O]<sup>+</sup>) requires 439.0652; found 439.0655 (+0.7 ppm).

**(R)-2-(4-bromophenyl)-4,5-diphenyl-4H-1,3,4-oxadiazin-6(5H)-one**

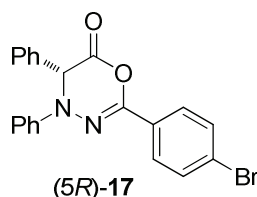



Following general procedure E, phenylacetic acid (40.9 mg, 0.30 mmol), DIPEA (78  $\mu$ L, 0.45 mmol) and p-methoxybenzoyl chloride (77 mg, 0.45 mmol) in DCM (2 mL), Ph/*i*-Pr isothiourea catalyst (2*S*,3*R*)-**5** (0.62 mg, 0.002 mmol, 1 mol%), diazene **67** (57.8 mg, 0.20 mmol) and DIPEA (52  $\mu$ L, 0.3 mmol) for 16 h at -78 °C gave, after chromatographic purification (eluent Et<sub>2</sub>O:petrol 1:99) (5*R*)-**17** as an off-white solid (63.3 mg, 78%);  $[\alpha]_D^{20}$  -609.0 (*c* 0.5, CH<sub>2</sub>Cl<sub>2</sub>); Chiral HPLC Chiralpak AD-H (5% IPA:hexane, flow rate 1 mL min<sup>-1</sup>, 211 nm, 20 °C)  $t_R$ (5*S*): 12.8 min,  $t_R$ (5*R*): 24.1 min, >99% *ee*.

#### 2-(4-chlorophenyl)-4,5-diphenyl-4H-1,3,4-oxadiazin-6(5H)-one

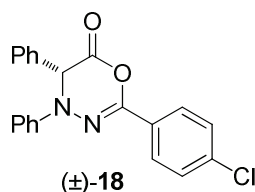

Following general procedure D, phenylacetic acid (40.9 mg, 0.30 mmol), DIPEA (78  $\mu$ L, 0.45 mmol) and p-methoxybenzoyl chloride (77 mg, 0.45 mmol) in DCM (2 mL), diazene **68** (48.9 mg, 0.20 mmol), DHPB **80** (7.60 mg, 0.04 mmol) and DIPEA (52  $\mu$ L, 0.3 mmol) for 1 h at rt gave, after chromatographic purification (eluent Et<sub>2</sub>O:petrol 1:99) (±)-**18** as an off-white solid (48.9 mg, 67%); mp 80-82 °C;  $\nu_{\max}$  (KBr) 2966 (C-H), 1777 (C=O), 1595, 1497;  $\delta_H$  (300 MHz, CDCl<sub>3</sub>) 5.95 (1H, s, C(5)*H*), 6.89-6.95 (1H, m, Ar*H*), 7.13-7.32 (11H, m, Ar*H*), 7.77-7.82 (2H, m, Ar*H*);  $\delta_C$  (75 MHz, CDCl<sub>3</sub>) 59.5 (C(5)), 114.5 (ArC), 122.1 (ArC), 126.6 (ArC), 126.8 (ArC), 127.3 (4ry ArC), 128.9 (ArC), 129.2 (ArC), 129.4 (ArC), 129.4 (ArC), 131.1 (4ry ArC), 136.4 (4ry ArC), 140.2 (C(2)), 144.1 (4ry ArC), 160.1 (C(6)); *m/z* (NSI<sup>+</sup>) 395 ([M+CH<sub>5</sub>O]<sup>+</sup>, 100%); HRMS (NSI<sup>+</sup>) C<sub>22</sub>H<sub>20</sub>ClN<sub>2</sub>O<sub>3</sub><sup>+</sup> ([M+CH<sub>5</sub>O]<sup>+</sup>) requires 395.1157; found 395.1158 (+0.3 ppm).

#### (*R*)-2-(4-chlorophenyl)-4,5-diphenyl-4H-1,3,4-oxadiazin-6(5H)-one

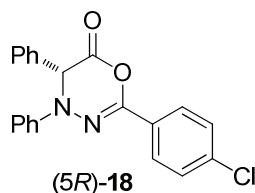

Following general procedure E, phenylacetic acid (40.9 mg, 0.30 mmol), DIPEA (78  $\mu$ L, 0.45 mmol) and p-methoxybenzoyl chloride (77 mg, 0.45 mmol) in DCM (2 mL), Ph/*i*-Pr isothiourea catalyst (2*S*,3*R*)-**5** (0.62 mg, 0.002 mmol, 1 mol%), diazene **68** (48.9 mg, 0.20 mmol) and DIPEA (52  $\mu$ L, 0.3 mmol) for 16 h at -78 °C gave, after chromatographic purification (eluent Et<sub>2</sub>O:petrol 1:99) (5*R*)-**18** as an off-white solid (56.3 mg, 78%);  $[\alpha]_D^{20}$  -

614.4 (*c* 0.5, CH<sub>2</sub>Cl<sub>2</sub>); Chiral HPLC Chiralpak AD-H (5% IPA:hexane, flow rate 1 mL min<sup>-1</sup>, 211 nm, 20 °C) *t<sub>R</sub>*(5*S*): 11.5 min, *t<sub>R</sub>*(5*R*): 22.8 min, >99% *ee*.

### 2-(4-bromophenyl)-4,5-diphenyl-4H-1,3,4-oxadiazin-6(5H)-one

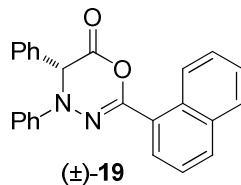

Following general procedure D, phenylacetic acid (40.9 mg, 0.30 mmol), DIPEA (78 μL, 0.45 mmol) and *p*-methoxybenzoyl chloride (77 mg, 0.45 mmol) in DCM (2 mL), diazene **69** (52.0 mg, 0.20 mmol), DHPB **80** (7.60 mg, 0.04 mmol) and DIPEA (52 μL, 0.3 mmol) for 1 h at rt gave, after chromatographic purification (eluent Et<sub>2</sub>O:petrol 1:99) (±)-**19** as an off-white solid (45.5 mg, 60%); mp 138-140 °C; *v*<sub>max</sub> (KBr) 3063 (C-H), 1791 (C=O), 1599, 1506; δ<sub>H</sub> (400 MHz, CDCl<sub>3</sub>) 6.05 (1H, s, C(5)*H*), 6.93 (1H, tt, *J* 6.9, 1.4, Ar*H*), 7.20-7.28 (7H, m, Ar*H*), 7.33-7.40 (3H, m, Ar*H*), 7.44 (1H, ddd, *J* 8.0, 6.9, 1.2, Ar*H*), 7.51 (1H, ddd, *J* 8.5, 6.9, 1.6, Ar*H*), 7.78-7.83 (2H, m, Ar*H*), 7.86 (1H, dd, *J* 7.4, 1.2, Ar*H*), 8.80-8.82 (1H, m, Ar*H*); δ<sub>C</sub> (75 MHz, CDCl<sub>3</sub>) 59.5 (C(5)), 114.6 (ArC), 122.1 (ArC), 124.9 (ArC), 125.4 (4ry ArC), 125.8 (ArC), 126.3 (ArC), 126.8 (4ry ArC), 127.4 (ArC), 127.5 (ArC), 128.9 (ArC), 129.2 (ArC), 129.4 (ArC), 129.5 (ArC), 130.3 (4ry ArC), 131.2 (4ry ArC), 131.4 (ArC), 134.1 (4ry ArC), 141.5 (C(2)), 144.5 (4ry ArC), 160.6 (C(6)); *m/z* (NSI<sup>+</sup>) 397 ([M+H<sub>3</sub>O]<sup>+</sup>, 100%); HRMS (NSI<sup>+</sup>) C<sub>25</sub>H<sub>21</sub>N<sub>2</sub>O<sub>3</sub><sup>+</sup> ([M+H<sub>3</sub>O]<sup>+</sup>) requires 397.1547; found 397.1548 (+0.3 ppm).

### (*R*)-2-(naphthalen-1-yl)-4,5-diphenyl-4H-1,3,4-oxadiazin-6(5H)-one

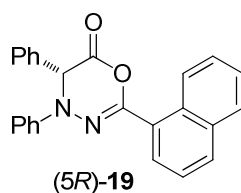

Following general procedure E, phenylacetic acid (40.9 mg, 0.30 mmol), DIPEA (78 μL, 0.45 mmol) and *p*-methoxybenzoyl chloride (77 mg, 0.45 mmol) in DCM (2 mL), Ph/*i*-Pr isothioureia catalyst (2*S*,3*R*)-**5** (0.62 mg, 0.002 mmol, 1 mol%), diazene **69** (52.0 mg, 0.20 mmol) and DIPEA (52 μL, 0.3 mmol) for 16 h at -78 °C gave, after chromatographic purification (eluent Et<sub>2</sub>O:petrol 1:99) (5*R*)-**19** as an off-white solid (53.5 mg, 71%); [α]<sub>D</sub><sup>20</sup> -611.5 (*c* 1.0, CH<sub>2</sub>Cl<sub>2</sub>); Chiral HPLC Chiralpak AD-H (2% IPA:hexane, flow rate 1 mL min<sup>-1</sup>, 211 nm, 20 °C) *t<sub>R</sub>*(5*S*): 15.7 min, *t<sub>R</sub>*(5*R*): 16.9 min, >99% *ee*.

**allyl 2-(2-benzoyl-1-phenylhydrazinyl)-2-phenylacetate**

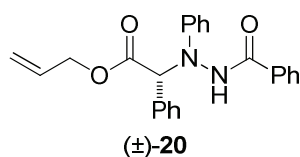

Following general procedure D, phenylacetic acid (40.9 mg, 0.30 mmol), DIPEA (78  $\mu$ L, 0.45 mmol) and benzoyl chloride (52  $\mu$ L, 0.45 mmol) in DCM (2 mL), diazene **60** (42.0 mg, 0.20 mmol), DHPB **80** (7.60 mg, 0.04 mmol) and DIPEA (52  $\mu$ L, 0.3 mmol) for 1 h at rt followed by addition of allyl alcohol (2 mL) and stirring for 1 h at rt gave, after chromatographic purification (eluent Et<sub>2</sub>O:petrol 40:60) a rotameric mixture (ratio 91:9) of (±)-**20** as a colourless oil (48.6 mg, 63%);  $\nu_{\max}$  (thin film) 3287 (N-H), 3064, 2948 (C-H), 1733 (C=O), 1683 (C=O), 1599; Data for major rotamer  $\delta_{\text{H}}$  (500 MHz, CDCl<sub>3</sub>) 4.75 (2H, d,  $J$  5.1, CH<sub>2</sub>), 5.26-5.32 (2H, m, CH<sub>2</sub>=CH), 5.87-5.93 (2H, m, C(2)H and CH<sub>2</sub>=CH), 6.98-7.06 (3H, m, ArH), 7.31-7.43 (7H, m, ArH), 7.48-7.59 (5H, m, ArH), 8.51 (1H, s, NH); Selected data for minor rotamer  $\delta_{\text{H}}$  (500 MHz, CDCl<sub>3</sub>) 5.61 (1H, s, C(2)H), 7.98 (1H, s, NH); Data for major rotamer  $\delta_{\text{C}}$  (100 MHz, CDCl<sub>3</sub>) 66.2 (CH<sub>2</sub>), 66.8 (C(2)), 114.9 (ArC), 119.6 (CH<sub>2</sub>=CH), 121.7 (ArC), 127.0 (ArC), 128.6 (ArC), 128.6 (ArC), 128.9 (ArC), 129.1 (ArC), 129.4 (ArC), 131.2 (CH<sub>2</sub>=CH), 131.7 (ArC), 133.0 (4ry ArC), 133.2 (4ry ArC), 148.3 (4ry ArC), 166.5 (C=O), 172.3 (C=O); Selected data for minor rotamer  $\delta_{\text{C}}$  (100 MHz, CDCl<sub>3</sub>) 65.8 (CH<sub>2</sub>), 68.1 (C(2)), 115.4 (ArC), 122.3 (ArC), 127.8 (ArC), 129.8 (ArC), 130.2 (ArC);  $m/z$  (NSI<sup>+</sup>) 387 ([M+H]<sup>+</sup>, 100%); HRMS (NSI<sup>+</sup>) C<sub>24</sub>H<sub>23</sub>N<sub>2</sub>O<sub>3</sub><sup>+</sup> ([M+H]<sup>+</sup>) requires 387.1703; found 387.1711 (+2.0 ppm).

**(R)-allyl 2-(2-benzoyl-1-phenylhydrazinyl)-2-phenylacetate**

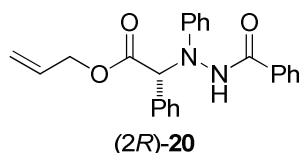

Following general procedure E, phenylacetic acid (40.9 mg, 0.30 mmol), DIPEA (78  $\mu$ L, 0.45 mmol) and benzoyl chloride (52.2  $\mu$ L, 0.45 mmol) in DCM (2 mL), Ph/*i*-Pr isothiurea catalyst (2*S*,3*R*)-**5** (0.62 mg, 0.002 mmol, 1 mol%), diazene **60** (42.0 mg, 0.20 mmol) and DIPEA (52  $\mu$ L, 0.3 mmol) for 16 h at -78 °C followed by addition of allyl alcohol (2 mL) and stirring for 1 h at rt gave, after chromatographic purification (eluent Et<sub>2</sub>O:petrol 40:60) a rotameric mixture (ratio 91:9) of (2*R*)-**20** as a colourless oil (63.8 mg, 83%);  $[\alpha]_{\text{D}}^{20}$  -30.0 ( $c$  0.5, CH<sub>2</sub>Cl<sub>2</sub>); Chiral HPLC Chiralpak IB (10% IPA:hexane, flow rate 1 mL min<sup>-1</sup>, 211 nm, 20 °C)  $t_{\text{R}}$ (2*R*): 18.1 min,  $t_{\text{R}}$ (2*S*): 21.8 min, 98% *ee*.

### 2-(2-benzoyl-1-phenylhydrazinyl)-N-isopropyl-2-phenylacetamide

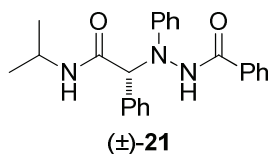

Following general procedure D, phenylacetic acid (40.9 mg, 0.30 mmol), DIPEA (78  $\mu$ L, 0.45 mmol) and benzoyl chloride (52  $\mu$ L, 0.45 mmol) in DCM (2 mL), diazene **60** (42.0 mg, 0.20 mmol), DHPB **80** (7.60 mg, 0.04 mmol) and DIPEA (52  $\mu$ L, 0.3 mmol) for 1 h at rt followed by addition of isopropylamine (2 mL) and stirring for 1 h at rt gave, after chromatographic purification (eluent Et<sub>2</sub>O:petrol 75:25) a rotameric mixture (ratio 93:7) of (±)-**21** as a white solid (53.4 mg, 69%); mp 64–66 °C;  $\nu_{\text{max}}$  (KBr) 3235 (N-H), 3064, 2971 (C-H), 1653 (C=O), 1598; Data for major rotamer  $\delta_{\text{H}}$  (500 MHz, CDCl<sub>3</sub>) 1.15 (3H, d, *J* 6.6, CH<sub>3</sub>), 1.21–1.26 (3H, m, CH<sub>3</sub>), 4.13 (1H, s, *J* 6.5, CH), 5.29 (1H, s, C(2)H), 6.85 (2H, d, *J* 6.8, ArH), 7.00 (1H, t, *J* 7.3, ArH), 7.20–7.35 (11H, m, ArH), 7.50 (1H, t, *J* 7.3, ArH), 7.59 (1H, s, NH), 9.38 (1H, s, NH); Selected data for minor rotamer  $\delta_{\text{H}}$  (500 MHz, CDCl<sub>3</sub>) 1.04 (6H, d, *J* 6.6, CH<sub>3</sub>), 3.96–4.03 (1H, m, CH); Data for major rotamer  $\delta_{\text{C}}$  (100 MHz, CDCl<sub>3</sub>) 22.4 (CH<sub>3</sub>), 22.5 (CH<sub>3</sub>), 41.6 (CH), 72.0 (C(2)), 112.5 (ArC), 120.7 (ArC), 127.0 (ArC), 128.7 (ArC), 128.9 (ArC), 129.0 (ArC), 129.5 (ArC), 129.7 (ArC), 132.0 (4ry ArC), 132.3 (ArC), 134.2 (4ry ArC), 147.3 (4ry ArC), 168.9 (C=O), 169.5 (C=O); Selected data for minor rotamer  $\delta_{\text{C}}$  (100 MHz, CDCl<sub>3</sub>) 22.6 (CH<sub>3</sub>), 41.5 (CH); *m/z* (NSI<sup>+</sup>) 388 ([M+H]<sup>+</sup>, 100%); HRMS (NSI<sup>+</sup>) C<sub>24</sub>H<sub>26</sub>N<sub>3</sub>O<sub>2</sub><sup>+</sup> ([M+H]<sup>+</sup>) requires 388.2020; found 388.2027 (+1.9 ppm).

### (R)-2-(2-benzoyl-1-phenylhydrazinyl)-N-isopropyl-2-phenylacetamide

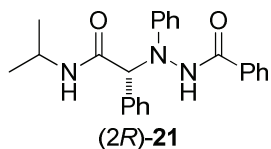

Following general procedure E, phenylacetic acid (40.9 mg, 0.30 mmol), DIPEA (78  $\mu$ L, 0.45 mmol) and benzoyl chloride (52.2  $\mu$ L, 0.45 mmol) in DCM (2 mL), Ph/*i*-Pr isothiurea catalyst (2*S*,3*R*)-**5** (0.62 mg, 0.002 mmol, 1 mol%), diazene **60** (42.0 mg, 0.20 mmol) and DIPEA (52  $\mu$ L, 0.3 mmol) for 16 h at -78 °C followed by addition of pyrrolidine (2 mL) and stirring for 1 h at rt gave, after chromatographic purification (eluent Et<sub>2</sub>O:petrol 75:25) a rotameric mixture (ratio 93:7) of (2*R*)-**21** as a white solid (71.0 mg, 92%); [ $\alpha$ ]<sub>D</sub><sup>20</sup> -132 (*c* 0.125, CH<sub>2</sub>Cl<sub>2</sub>); Chiral HPLC Chiralpak IB (20% IPA:hexane, flow rate 1 mL min<sup>-1</sup>, 211 nm, 20 °C) *t*<sub>R</sub>(2*S*): 6.6 min, *t*<sub>R</sub>(2*R*): 7.6 min, 99% *ee*.

### **N'-(2-oxo-1-phenyl-2-(pyrrolidin-1-yl)ethyl)-N'-phenylbenzohydrazide**

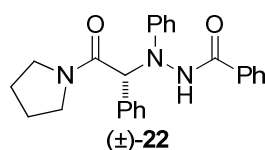

Following general procedure E, phenylacetic acid (40.9 mg, 0.30 mmol), DIPEA (78  $\mu$ L, 0.45 mmol) and benzoyl chloride (52  $\mu$ L, 0.45 mmol) in DCM (2 mL), diazene **60** (42.0 mg, 0.20 mmol), DHPB **80** (7.60 mg, 0.04 mmol) and DIPEA (52  $\mu$ L, 0.3 mmol) for 1 h at rt followed by addition of pyrrolidine (2 mL) and stirring for 1 h at rt gave, after chromatographic purification (eluent Et<sub>2</sub>O) a rotameric mixture (ratio 96:4) of (±)-**22** as a colourless oil (71.3 mg, 89%);  $\nu_{\max}$  (thin film) 3344 (N-H), 3063 (C-H), 1687 (C=O), 1582; Data for major rotamer  $\delta_{\text{H}}$  (500 MHz, CDCl<sub>3</sub>) 1.74-1.92 (4H, m, 2CH<sub>2</sub>), 3.07-3.10 (1H, m, CHH), 3.42-3.54 (3H, m, CH<sub>2</sub> and CHH), 5.77 (1H, s, C(2)H), 6.85-6.93 (3H, m, ArH), 7.19-7.27 (7H, m, ArH), 7.36 (1H, t, *J* 7.1, ArH), 7.45 (2H, d, *J* 7.1, ArH), 7.50 (2H, d, *J* 7.4, ArH), 9.41 (1H, s, NH); Selected data for minor rotamer  $\delta_{\text{H}}$  (500 MHz, CDCl<sub>3</sub>) 5.44 (1H, s, C(2)H), 8.65 (1H, s, NH); Data for major rotamer  $\delta_{\text{C}}$  (100 MHz, CDCl<sub>3</sub>) 24.1 (CH<sub>2</sub>), 26.1 (CH<sub>2</sub>), 45.8 (CH<sub>2</sub>), 46.3 (CH<sub>2</sub>), 65.7 (C(2)), 114.9 (ArC), 121.4 (ArC), 127.1 (ArC), 128.4 (ArC), 128.7 (ArC), 128.8 (ArC), 129.4 (ArC), 129.5 (ArC), 131.5 (ArC), 133.2 (4ry ArC), 133.4 (4ry ArC), 149.2 (4ry ArC), 166.4 (C=O), 170.7 (C=O); Selected data for minor rotamer  $\delta_{\text{C}}$  (100 MHz, CDCl<sub>3</sub>) 23.9 (CH<sub>2</sub>), 26.0 (CH<sub>2</sub>), 67.7 (C(2)), 115.7 (ArC), 121.8 (ArC), 126.9 (ArC), 127.8 (ArC), 129.7 (ArC), 130.5 (ArC); *m/z* (NSI<sup>+</sup>) 400 ([M+H]<sup>+</sup>, 100%); HRMS (NSI<sup>+</sup>) C<sub>25</sub>H<sub>26</sub>N<sub>3</sub>O<sub>2</sub><sup>+</sup> ([M+H]<sup>+</sup>) requires 400.2020; found 400.2026 (+1.6 ppm).

### **(R)-N'-(2-oxo-1-phenyl-2-(pyrrolidin-1-yl)ethyl)-N'-phenylbenzohydrazide**

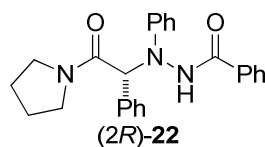

Following general procedure E, phenylacetic acid (40.9 mg, 0.30 mmol), DIPEA (78  $\mu$ L, 0.45 mmol) and benzoyl chloride (52.2  $\mu$ L, 0.45 mmol) in DCM (2 mL), Ph/*i*-Pr isothiurea catalyst (2*S*,3*R*)-**5** (0.62 mg, 0.002 mmol, 1 mol%), diazene **60** (42.0 mg, 0.20 mmol) and DIPEA (52  $\mu$ L, 0.3 mmol) for 16 h at -78 °C followed by addition of pyrrolidine (2 mL) and stirring for 1 h at rt gave, after chromatographic purification (eluent Et<sub>2</sub>O) a rotameric mixture (ratio 96:4) of (2*R*)-**22** as a colourless oil (69.7 mg, 87%);  $[\alpha]_{\text{D}}^{20}$  -96.6 (*c* 0.5, CH<sub>2</sub>Cl<sub>2</sub>); Chiral HPLC Chiralpak IB (40% IPA:hexane, flow rate 1 mL min<sup>-1</sup>, 211 nm, 20 °C) *t*<sub>R</sub>(2*S*): 6.3 min, *t*<sub>R</sub>(2*R*): 11.1 min, 99% *ee*.

**methyl 2-(2-benzoyl-1-phenylhydrazinyl)-2-(4-methoxyphenyl)acetate**

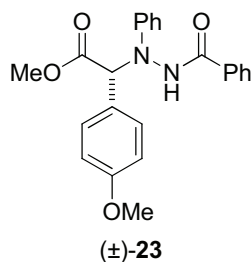

Following general procedure D, 4-methoxyphenylacetic acid (49.9 mg, 0.30 mmol), DIPEA (78  $\mu$ L, 0.45 mmol) and benzoyl chloride (52  $\mu$ L, 0.45 mmol) in DCM (2 mL), diazene **60** (42.0 mg, 0.20 mmol), DHPB **80** (7.60 mg, 0.04 mmol) and DIPEA (52  $\mu$ L, 0.3 mmol) for 1 h at rt followed by addition of MeOH (2 mL) and stirring for 1 h at rt gave, after chromatographic purification (eluent EtOAc:petrol 35:65) a rotameric mixture (ratio 89:11) of (±)-**23** as a light yellow solid (58.3 mg, 75%); mp 36-38 °C;  $\nu_{\max}$  (KBr) 3368 (N-H), 3060, 2952 (C-H), 1734 (C=O), 1675 (C=O), 1612, 1514; Data for major rotamer  $\delta_{\text{H}}$  (300 MHz,  $\text{CDCl}_3$ ) 3.66 (3H, s,  $\text{CH}_3$ ), 3.71 (3H, s,  $\text{CH}_3$ ), 5.75 (1H, s, C(2)H), 6.75-6.79 (2H, m, ArH), 6.85-6.95 (3H, m, ArH), 7.18-7.24 (2H, m, ArH), 7.26-7.34 (4H, m, ArH), 7.36-7.42 (1H, m, ArH), 7.48-7.52 (2H, m, ArH), 8.43 (1H, s, NH); Selected data for minor rotamer  $\delta_{\text{H}}$  (300 MHz,  $\text{CDCl}_3$ ) 3.60 (3H, s,  $\text{CH}_3$ ), 3.71 (3H, s,  $\text{CH}_3$ ), 5.45 (1H, s, C(2)H), 6.56-6.59 (2H, m, ArH), 7.85 (1H, s, NH); Data for major rotamer  $\delta_{\text{C}}$  (75 MHz,  $\text{CDCl}_3$ ) 52.5 ( $\text{CH}_3$ ), 55.2 ( $\text{CH}_3$ ), 66.1 (C(2)), 114.0 (ArC), 114.8 (ArC), 121.6 (ArC), 125.2 (4ry ArC), 127.1 (ArC), 128.6 (ArC), 129.5 (ArC), 130.4 (ArC), 131.8 (ArC), 133.0 (4ry ArC), 148.4 (4ry ArC), 159.9 (4ry ArC), 166.6 (C=O), 173.3 (C=O); Selected data for minor rotamer  $\delta_{\text{C}}$  (75 MHz,  $\text{CDCl}_3$ ) 52.4 ( $\text{CH}_3$ ), 55.4 ( $\text{CH}_3$ ), 67.2 (C(2)), 115.3 (ArC), 122.2 (ArC), 127.8 (ArC), 129.9 (ArC), 131.4 (ArC);  $m/z$  (NSI<sup>+</sup>) 391 ([M+H]<sup>+</sup>, 100%); HRMS (NSI<sup>+</sup>)  $\text{C}_{23}\text{H}_{23}\text{N}_2\text{O}_4^+$  ([M+H]<sup>+</sup>) requires 391.1652; found 391.1655 (+0.7 ppm).

**(R)-methyl 2-(2-benzoyl-1-phenylhydrazinyl)-2-(4-methoxyphenyl)acetate**

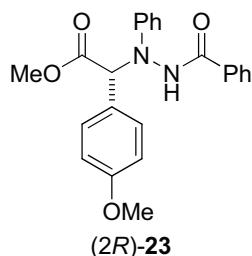

Following general procedure E, 4-methoxyphenylacetic acid (49.9 mg, 0.30 mmol), DIPEA (78  $\mu$ L, 0.45 mmol) and benzoyl chloride (52.2  $\mu$ L, 0.45 mmol) in DCM (2 mL), Ph/*i*-Pr isothiourea catalyst (2*S*,3*R*)-**5** (0.62 mg, 0.002 mmol, 1 mol%), diazene **60** (42.0 mg, 0.20 mmol) and DIPEA (52  $\mu$ L, 0.3 mmol) for 16 h at -78 °C followed by addition of MeOH (2

mL) and stirring for 1 h at rt gave, after chromatographic purification (eluent EtOAc:petrol 30:70) a rotameric mixture (ratio 89:11) of (2*R*)-**23** as a light yellow oil (59.3 mg, 76%);  $[\alpha]_D^{20}$  -30.8 (*c* 0.5, CH<sub>2</sub>Cl<sub>2</sub>); Chiral HPLC Chiralpak IB (10% IPA:hexane, flow rate 1 mL min<sup>-1</sup>, 211 nm, 20 °C) *t*<sub>R</sub>(2*S*): 19.3 min, *t*<sub>R</sub>(2*R*): 26.2 min, 98% *ee*.

#### methyl 2-(2-benzoyl-1-phenylhydrazinyl)-2-(thiophen-3-yl)acetate

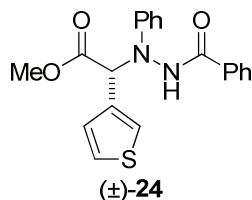

Following general procedure D, thiophene-3-acetic acid (42.7 mg, 0.30 mmol), DIPEA (78 μL, 0.45 mmol) and benzoyl chloride (52 μL, 0.45 mmol) in DCM (2 mL), diazene **60** (42.0 mg, 0.20 mmol), DHPB **80** (7.60 mg, 0.04 mmol) and DIPEA (52 μL, 0.3 mmol) for 1 h at rt followed by addition of MeOH (2 mL) and stirring for 1 h at rt gave, after chromatographic purification (eluent EtOAc:petrol 25:75) a rotameric mixture (ratio 92:8) of (±)-**24** as a light yellow solid (67.2 mg, 92%); mp 128-130 °C;  $\nu_{\max}$  (KBr) 3355 (N-H), 3078, 2952 (C-H), 1727 (C=O), 1685 (C=O), 1600, 1514; Data for major rotamer  $\delta_H$  (400 MHz, CDCl<sub>3</sub>) 3.72 (3H, s, CH<sub>3</sub>), 5.83 (1H, s, C(2)H), 6.87-6.95 (3H, m, ArH), 7.16-7.23 (4H, m, ArH), 7.28-7.33 (3H, m, ArH), 7.38-7.42 (1H, m, ArH), 7.49-7.51 (2H, m, ArH), 8.47 (1H, s, NH); Selected data for minor rotamer  $\delta_H$  (400 MHz, CDCl<sub>3</sub>) 3.59 (3H, s, CH<sub>3</sub>), 5.56 (1H, s, C(2)H), 6.57 (1H, dd, *J* 5.0, 1.3, ArH), 7.89 (1H, s, NH); Data for major rotamer  $\delta_C$  (75 MHz, CDCl<sub>3</sub>) 52.6 (CH<sub>3</sub>), 62.7 (C(2)), 114.8 (ArC), 121.8 (ArC), 125.0 (ArC), 126.3 (ArC), 127.1 (ArC), 128.2 (ArC), 128.7 (ArC), 129.5 (ArC), 131.9 (ArC), 133.0 (4ry ArC), 133.8 (4ry ArC), 148.1 (4ry ArC), 166.8 (C=O), 173.0 (C=O); Selected data for minor rotamer  $\delta_C$  (100 MHz, CDCl<sub>3</sub>) 52.5 (CH<sub>3</sub>), 62.8 (C(2)), 115.4 (ArC), 122.3 (ArC), 126.1 (ArC), 127.8 (ArC), 129.9 (ArC), 130.6 (ArC); *m/z* (NSI<sup>+</sup>) 367 ([M+H]<sup>+</sup>, 100%); HRMS (NSI<sup>+</sup>) C<sub>20</sub>H<sub>19</sub>N<sub>2</sub>O<sub>3</sub>S<sup>+</sup> ([M+H]<sup>+</sup>) requires 367.1111; found 367.1114 (+0.8 ppm).

#### (*R*)-methyl 2-(2-benzoyl-1-phenylhydrazinyl)-2-(thiophen-3-yl)acetate

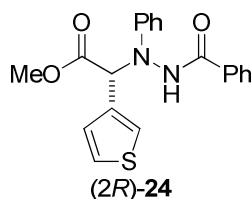

Following general procedure E, thiophene-3-acetic acid (42.7 mg, 0.30 mmol), DIPEA (78 μL, 0.45 mmol) and benzoyl chloride (52.2 μL, 0.45 mmol) in DCM (2 mL), Ph/*i*-Pr isothiourea catalyst (2*S*,3*R*)-**5** (0.62 mg, 0.002 mmol, 1 mol%), diazene **60** (42.0 mg, 0.20



mmol) and DIPEA (52  $\mu\text{L}$ , 0.3 mmol) for 16 h at  $-78\text{ }^\circ\text{C}$  followed by addition of MeOH (2 mL) and stirring for 1 h at rt gave, after chromatographic purification (eluent EtOAc:petrol 25:75) a rotameric mixture (ratio 91:9) of (2*R*)-**24** as a light yellow oil (63.1 mg, 86%);  $[\alpha]_{\text{D}}^{20}$   $-26.2$  ( $c$  0.5,  $\text{CH}_2\text{Cl}_2$ ); Chiral HPLC Chiralcel OD-H (10% IPA:hexane, flow rate 1 mL  $\text{min}^{-1}$ , 211 nm,  $20\text{ }^\circ\text{C}$ )  $t_{\text{R}}(2\text{S})$ : 28.0 min,  $t_{\text{R}}(2\text{R})$ : 31.5 min,  $>99\%$  *ee*.

#### methyl 2-(2-(4-methylbenzoyl)-1-phenylhydrazinyl)-2-phenylacetate

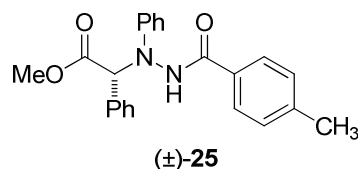

Following general procedure D, phenylacetic acid (81.7 mg, 0.60 mmol), DIPEA (156  $\mu\text{L}$ , 0.90 mmol) and benzoyl chloride (104  $\mu\text{L}$ , 0.90 mmol) in DCM (2 mL), diazene **71** (44.8 mg, 0.20 mmol), DHPB **80** (7.60 mg, 0.04 mmol) and DIPEA (52  $\mu\text{L}$ , 0.3 mmol) for 2 h at rt followed by addition of MeOH (2 mL) and stirring for 1 h at rt gave, after chromatographic purification (eluent  $\text{Et}_2\text{O}$ :petrol 40:60) a rotameric mixture (ratio 92:8) of (±)-**25** as a white solid (66.0 mg, 88%); mp  $36\text{--}38\text{ }^\circ\text{C}$ ;  $\nu_{\text{max}}$  (KBr) 3374 (N-H), 3030, 2924 (C-H), 1750 (C=O), 1708 (C=O), 1599; Data for major rotamer  $\delta_{\text{H}}$  (400 MHz,  $\text{CDCl}_3$ ) 2.28 (3H, s,  $\text{CH}_3$ ), 3.73 (3H, s,  $\text{CH}_3$ ), 5.80 (1H, s, C(2)*H*), 6.86-6.95 (3H, m, *ArH*), 7.08 (2H, d,  $J$  7.9, *ArH*), 7.19-7.27 (5H, m, *ArH*), 7.34-7.39 (4H, m, *ArH*), 8.40 (1H, s, *NH*); Selected data for minor rotamer  $\delta_{\text{H}}$  (400 MHz,  $\text{CDCl}_3$ ) 2.18 (3H, s,  $\text{CH}_3$ ), 3.61 (3H, s,  $\text{CH}_3$ ), 5.51 (1H, s, C(2)*H*), 6.70-6.80 (2H, m, *ArH*), 7.84 (1H, s, *NH*); Data for major rotamer  $\delta_{\text{C}}$  (75 MHz,  $\text{CDCl}_3$ ) 21.5 ( $\text{CH}_3$ ), 52.5 ( $\text{CH}_3$ ), 66.7 (C(2)), 114.8 (*ArC*), 121.6 (*ArC*), 127.1 (*ArC*), 128.6 (*ArC*), 128.9 (*ArC*), 129.1 (*ArC*), 129.2 (*ArC*), 129.5 (*ArC*), 130.0 (4ry *ArC*), 133.3 (4ry *ArC*), 142.3 (4ry *ArC*), 148.5 (4ry *ArC*), 166.5 (C=O), 173.1 (C=O); Selected data for minor rotamer  $\delta_{\text{C}}$  (100 MHz,  $\text{CDCl}_3$ ) 22.7 ( $\text{CH}_3$ ), 52.4 ( $\text{CH}_3$ ), 68.0 (C(2)), 115.4 (*ArC*), 122.2 (*ArC*), 127.8 (*ArC*), 128.0 (*ArC*), 129.8 (*ArC*), 130.2 (*ArC*);  $m/z$  ( $\text{NSI}^+$ ) 375 ( $[\text{M}+\text{H}]^+$ , 100%); HRMS ( $\text{NSI}^+$ )  $\text{C}_{23}\text{H}_{23}\text{N}_2\text{O}_3^+$  ( $[\text{M}+\text{H}]^+$ ) requires 375.1703; found 375.1706 (+0.7 ppm).

#### (*R*)-methyl 2-(2-(4-methylbenzoyl)-1-phenylhydrazinyl)-2-phenylacetate

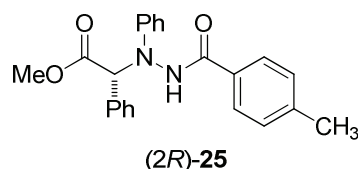

Following general procedure E, phenylacetic acid (81.7 mg, 0.60 mmol), DIPEA (156  $\mu\text{L}$ , 0.90 mmol) and benzoyl chloride (104  $\mu\text{L}$ , 0.90 mmol) in DCM (2 mL), Ph/*i*-Pr isothiourea catalyst (2*S*,3*R*)-**5** (0.62 mg, 0.002 mmol, 1 mol%), diazene **71** (44.8 mg, 0.20 mmol) and



DIPEA (52  $\mu\text{L}$ , 0.3 mmol) for 16 h at  $-78\text{ }^\circ\text{C}$  followed by addition of MeOH (2 mL) and stirring for 1 h at rt gave, after chromatographic purification (eluent  $\text{Et}_2\text{O}$ :petrol 40:60) a rotameric mixture (ratio 92:8) of (2*R*)-**25** as a white solid (49.2 mg, 66%);  $[\alpha]_{\text{D}}^{20} -24.3$  ( $c$  1.0,  $\text{CH}_2\text{Cl}_2$ ); Chiral HPLC Chiralcel OD-H (10% IPA:hexane, flow rate 1 mL  $\text{min}^{-1}$ , 211 nm, 20  $^\circ\text{C}$ )  $t_{\text{R}}(2\text{S})$ : 11.9 min,  $t_{\text{R}}(2\text{R})$ : 14.3 min,  $>99\%$  *ee*.

#### methyl 2-(2-(furan-2-carbonyl)-1-phenylhydrazinyl)-2-phenylacetate

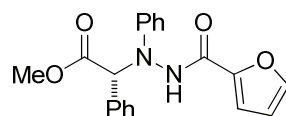

( $\pm$ )-**26**

Following general procedure D, phenylacetic acid (40.9 mg, 0.30 mmol), DIPEA (78.0  $\mu\text{L}$ , 0.45 mmol) and benzoyl chloride (52.2  $\mu\text{L}$ , 0.90 mmol) in DCM (2 mL), diazene **72** (40.0 mg, 0.20 mmol), DHPB **80** (7.60 mg, 0.04 mmol) and DIPEA (52  $\mu\text{L}$ , 0.3 mmol) for 1 h at rt followed by addition of MeOH (2 mL) and stirring for 1 h at rt gave, after chromatographic purification (eluent  $\text{Et}_2\text{O}$ :petrol 50:50) a rotameric mixture (ratio 93:7) of ( $\pm$ )-**26** as a white solid (50.3 mg, 72%); mp 148-150  $^\circ\text{C}$ ;  $\nu_{\text{max}}$  (KBr) 3345 (N-H), 3097, 2950 (C-H), 1729 (C=O), 1695 (C=O), 1598; Data for major rotamer  $\delta_{\text{H}}$  (300 MHz,  $\text{CDCl}_3$ ) 3.72 (3H, s,  $\text{CH}_3$ ), 5.77 (1H, s, C(2)*H*), 6.36 (1H, dd,  $J$  3.5, 1.8, *ArH*), 6.86-6.96 (4H, m, *ArH*), 7.18-7.24 (5H, m, *ArH*), 7.34-7.38 (3H, m, *ArH*), 8.67 (1H, s, *NH*); Selected data for minor rotamer  $\delta_{\text{H}}$  (300 MHz,  $\text{CDCl}_3$ ) 3.65 (3H, s,  $\text{CH}_3$ ), 5.65 (1H, s, C(2)*H*), 6.14 (1H, dd,  $J$  3.5, 1.7, *ArH*), 7.82 (1H, s, *NH*); Data for major rotamer  $\delta_{\text{C}}$  (75 MHz,  $\text{CDCl}_3$ ) 52.5 ( $\text{CH}_3$ ), 66.7 (C(2)), 112.0 (*ArC*), 115.0 (*ArC*), 115.5 (*ArC*), 121.8 (*ArC*), 128.6 (*ArC*), 128.9 (*ArC*), 129.2 (*ArC*), 129.4 (*ArC*), 133.1 (4ry *ArC*), 144.4 (4ry *ArC*), 146.6 (4ry *ArC*), 148.4 (4ry *ArC*), 157.2 (C=O), 172.7 (C=O); Selected data for minor rotamer  $\delta_{\text{C}}$  (75 MHz,  $\text{CDCl}_3$ ) 52.5 ( $\text{CH}_3$ ), 67.6 (C(2)), 112.0 (*ArC*), 115.2 (*ArC*), 117.2 (*ArC*), 122.4 (*ArC*), 128.5 (*ArC*), 129.8 (*ArC*), 130.0 (*ArC*), 144.9 (*ArC*);  $m/z$  ( $\text{NSI}^+$ ) 351 ( $[\text{M}+\text{H}]^+$ , 100%); HRMS ( $\text{NSI}^+$ )  $\text{C}_{20}\text{H}_{19}\text{N}_2\text{O}_4^+$  ( $[\text{M}+\text{H}]^+$ ) requires 351.1339; found 351.1339 (-0.1 ppm).

#### (*R*)-methyl 2-(2-(furan-2-carbonyl)-1-phenylhydrazinyl)-2-phenylacetate

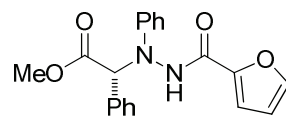

(2*R*)-**26**

Following general procedure E, phenylacetic acid (40.9 mg, 0.30 mmol), DIPEA (78.0  $\mu\text{L}$ , 0.45 mmol) and benzoyl chloride (52.2  $\mu\text{L}$ , 0.45 mmol) in DCM (2 mL), Ph/*i*-Pr isothiourea catalyst (2*S*,3*R*)-**5** (0.62 mg, 0.002 mmol, 1 mol%), diazene **72** (40.0 mg, 0.20 mmol) and

DIPEA (52  $\mu\text{L}$ , 0.3 mmol) for 16 h at  $-78\text{ }^\circ\text{C}$  followed by addition of MeOH (2 mL) and stirring for 1 h at rt gave, after chromatographic purification (eluent  $\text{Et}_2\text{O}$ :petrol 50:50) a rotameric mixture (ratio 93:7) of (2*R*)-**26** as a white solid (59.5 mg, 85%);  $[\alpha]_{\text{D}}^{20} -38.8$  ( $c$  0.5,  $\text{CH}_2\text{Cl}_2$ ); Chiral HPLC Chiralpak IB (10% IPA:hexane, flow rate  $1\text{ mL min}^{-1}$ , 211 nm,  $20\text{ }^\circ\text{C}$ )  $t_{\text{R}}(2\text{S})$ : 16.2 min,  $t_{\text{R}}(2\text{R})$ : 21.5 min, 99% *ee*.

#### methyl 2-(2-(4-nitrobenzoyl)-1-phenylhydrazinyl)-2-phenylacetate

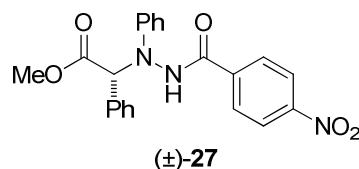

Following general procedure D, phenylacetic acid (40.9 mg, 0.30 mmol), DIPEA (78  $\mu\text{L}$ , 0.45 mmol) and benzoyl chloride (52  $\mu\text{L}$ , 0.45 mmol) in DCM (2 mL), diazene **70** (51.0 mg, 0.20 mmol), DHPB **80** (7.60 mg, 0.04 mmol) and DIPEA (52  $\mu\text{L}$ , 0.3 mmol) for 1 h at rt followed by addition of MeOH (2 mL) and stirring for 1 h at rt gave, after chromatographic purification (eluent  $\text{Et}_2\text{O}$ :petrol 50:50) a rotameric mixture (ratio 69:31) of (±)-**27** as a light yellow solid (66.0 mg, 81%); mp  $58\text{--}56\text{ }^\circ\text{C}$ ;  $\nu_{\text{max}}$  (KBr) 3412 (N-H), 3075, 2953 (C-H), 1735 (C=O), 1678 (C=O), 1599, 1525 (N-O), 1346 (N-O); Data for major rotamer  $\delta_{\text{H}}$  (300 MHz,  $\text{CDCl}_3$ ) 3.74 (3H, s,  $\text{CH}_3$ ), 5.81 (1H, s, C(2)*H*), 6.91-6.95 (3H, m, *ArH*), 7.21-7.28 (5H, m, *ArH*), 7.35-7.39 (2H, m, *ArH*), 7.55-7.58 (2H, m, *ArH*), 8.10-8.13 (2H, m, *ArH*), 8.62 (1H, s, *NH*); Selected data for minor rotamer  $\delta_{\text{H}}$  (300 MHz,  $\text{CDCl}_3$ ) 3.61 (3H, s,  $\text{CH}_3$ ), 5.46 (1H, s, C(2)*H*), 7.77-7.80 (2H, m, *ArH*), 8.12 (1H, s, *NH*); Data for major rotamer  $\delta_{\text{C}}$  (75 MHz,  $\text{CDCl}_3$ ) 52.6 ( $\text{CH}_3$ ), 66.8 (C(2)), 114.9 (*ArC*), 122.1 (*ArC*), 123.8 (*ArC*), 128.3 (*ArC*), 128.7 (*ArC*), 129.1 (*ArC*), 129.1 (*ArC*), 129.6 (*ArC*), 133.1 (4ry *ArC*), 138.5 (4ry *ArC*), 148.0 (4ry *ArC*), 148.6 (4ry *ArC*), 164.8 (C=O), 173.1 (C=O); Selected data for minor rotamer  $\delta_{\text{C}}$  (75 MHz,  $\text{CDCl}_3$ ) 52.6 ( $\text{CH}_3$ ), 68.4 (C(2)), 115.8 (*ArC*), 122.3 (*ArC*), 123.0 (*ArC*), 128.6 (*ArC*), 128.9 (*ArC*), 130.1 (*ArC*), 130.3 (*ArC*), 132.4 (4ry *ArC*), 138.6 (4ry *ArC*), 149.7 (4ry *ArC*), 171.4 (C=O), 171.5 (C=O);  $m/z$  (NSI<sup>+</sup>) 406 ( $[\text{M}+\text{H}]^+$ , 100%); HRMS (NSI<sup>+</sup>)  $\text{C}_{22}\text{H}_{20}\text{N}_3\text{O}_5^+$  ( $[\text{M}+\text{H}]^+$ ) requires 406.1397; found 406.1399 (+0.4 ppm).

#### (*R*)-methyl 2-(2-(4-nitrobenzoyl)-1-phenylhydrazinyl)-2-phenylacetate

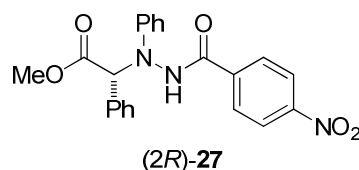

Following general procedure E, phenylacetic acid (40.9 mg, 0.30 mmol), DIPEA (78  $\mu\text{L}$ , 0.45 mmol) and benzoyl chloride (52.2  $\mu\text{L}$ , 0.45 mmol) in DCM (2 mL), Ph/*i*-Pr isothiurea

catalyst (2*S*,3*R*)-**5** (0.62 mg, 0.002 mmol, 1 mol%), diazene **70** (51.0 mg, 0.20 mmol) and DIPEA (52  $\mu$ L, 0.3 mmol) for 16 h at -78 °C followed by addition of MeOH (2 mL) and stirring for 1 h at rt gave, after chromatographic purification (eluent Et<sub>2</sub>O:petrol 50:50) a rotameric mixture (ratio 69:31) of (2*R*)-**27** as a light yellow solid (67.8 mg, 84%);  $[\alpha]_D^{20}$  -47.0 (*c* 0.5, CH<sub>2</sub>Cl<sub>2</sub>); Chiral HPLC Chiralpak IA (40% IPA:hexane, flow rate 1 mL min<sup>-1</sup>, 211 nm, 20 °C) *t*<sub>R</sub>(2*S*): 20.9 min, *t*<sub>R</sub>(2*R*): 30.6 min, 99% *ee*.

#### methyl 2-(2-(4-nitrobenzoyl)-1-phenylhydrazinyl)-2-(*o*-tolyl)acetate

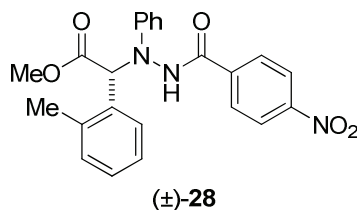

Following general procedure D, *o*-tolylacetic acid (45.1 mg, 0.30 mmol), DIPEA (78  $\mu$ L, 0.45 mmol) and benzoyl chloride (52  $\mu$ L, 0.45 mmol) in DCM (2 mL), diazene **70** (51.0 mg, 0.20 mmol), DHPB **80** (7.60 mg, 0.04 mmol) and DIPEA (52  $\mu$ L, 0.3 mmol) for 1 h at rt followed by addition of MeOH (2 mL) and stirring for 1 h at rt gave, after chromatographic purification (eluent Et<sub>2</sub>O:petrol 50:50) a rotameric mixture (ratio 55:45) of (±)-**28** as a light yellow solid (63.0 mg, 75%); mp 56-58 °C;  $\nu_{\max}$  (KBr) 3333 (N-H), 3085, 2962 (C-H), 1721 (C=O), 1679 (C=O), 1598, 1529 (N-O), 1348 (N-O); Data for both rotamers  $\delta_H$  (400 MHz, CDCl<sub>3</sub>) 1.69 (3H, s, CH<sub>3</sub>), 2.53 (3H, s, CH<sub>3</sub>), 3.60 (3H, s, CH<sub>3</sub>), 3.73 (3H, s, CH<sub>3</sub>), 5.64 (1H, s, C(2)*H*), 5.91 (1H, s, C(2)*H*), 6.74-6.76 (1H, m, Ar*H*), 6.82-6.85 (2H, m, Ar*H*), 6.90-7.07 (7H, m, Ar*H*), 7.12-7.21 (6H, m, Ar*H*), 7.23-7.27 (2H, m, Ar*H*), 7.36-7.40 (2H, m, Ar*H*), 7.55-7.58 (2H, m, Ar*H*), 7.79-7.82 (2H, m, Ar*H*), 8.10-8.13 (2H, m, Ar*H*), 8.18 (1H, s, NH), 8.50 (1H, s, NH); Data for both rotamers  $\delta_C$  (100 MHz, CDCl<sub>3</sub>) 18.5 (CH<sub>3</sub>), 19.2 (CH<sub>3</sub>), 52.5 (CH<sub>3</sub>), 52.6 (CH<sub>3</sub>), 63.8 (C(2)), 65.2 (C(2)), 114.3 (ArC), 115.5 (ArC), 121.7 (ArC), 122.3 (ArC), 123.0 (ArC), 123.8 (ArC), 125.5 (ArC), 126.7 (ArC), 127.7 (ArC), 128.2 (ArC), 128.4 (ArC), 129.3 (ArC), 129.6 (ArC), 129.7 (ArC), 129.9 (ArC), 130.2 (ArC), 130.8 (ArC), 130.8 (4ry ArC), 131.2 (ArC), 131.3 (4ry ArC), 138.2 (4ry ArC), 138.6 (4ry ArC), 138.7 (4ry ArC), 139.8 (4ry ArC), 148.0 (4ry ArC), 148.6 (4ry ArC), 148.8 (4ry ArC), 149.7 (4ry ArC), 164.7 (C=O), 171.7 (C=O), 171.9 (C=O), 173.6 (C=O); *m/z* (NSI<sup>+</sup>) 442 ([M+Na]<sup>+</sup>, 42%); HRMS (NSI<sup>+</sup>) C<sub>23</sub>H<sub>21</sub>N<sub>3</sub>NaO<sub>5</sub><sup>+</sup> ([M+Na]<sup>+</sup>) requires 442.1373; found 442.1375 (+0.4 ppm).

**(R)-methyl 2-(2-(4-nitrobenzoyl)-1-phenylhydrazinyl)-2-(o-tolyl)acetate**

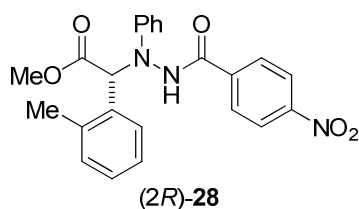

Following general procedure E, o-tolylacetic acid (45.1 mg, 0.30 mmol), DIPEA (78  $\mu$ L, 0.45 mmol) and benzoyl chloride (52.2  $\mu$ L, 0.45 mmol) in DCM (2 mL), Ph/*i*-Pr isothiourea catalyst (2*S*,3*R*)-**5** (0.62 mg, 0.002 mmol, 1 mol%), diazene **70** (51.0 mg, 0.20 mmol) and DIPEA (52  $\mu$ L, 0.3 mmol) for 16 h at -78 °C followed by addition of MeOH (2 mL) and stirring for 1 h at rt gave, after chromatographic purification (eluent Et<sub>2</sub>O:petrol 50:50) a rotameric mixture (ratio 55:45) of (2*R*)-**28** as a light yellow solid (67.7 mg, 81%);  $[\alpha]_{\text{D}}^{20}$  -30.0 (*c* 0.25, CH<sub>2</sub>Cl<sub>2</sub>); Chiral HPLC Chiralpak IA (40% IPA:hexane, flow rate 1 mL min<sup>-1</sup>, 211 nm, 20 °C)  $t_{\text{R}}$ (2*S*): 11.7 min,  $t_{\text{R}}$ (2*R*): 16.1 min, 99% *ee*.

**methyl 2-(naphthalen-1-yl)-2-(2-(4-nitrobenzoyl)-1-phenylhydrazinyl)acetate**

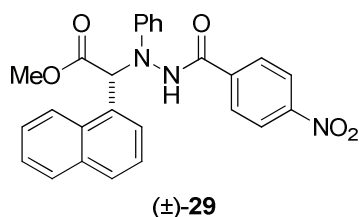

Following general procedure D, 1-naphthylacetic acid (55.9 mg, 0.30 mmol), DIPEA (78  $\mu$ L, 0.45 mmol) and benzoyl chloride (52  $\mu$ L, 0.45 mmol) in DCM (2 mL), diazene **70** (51.0 mg, 0.20 mmol), DHPB **80** (7.60 mg, 0.04 mmol) and DIPEA (52  $\mu$ L, 0.3 mmol) for 1 h at rt followed by addition of MeOH (2 mL) and stirring for 1 h at rt gave, after chromatographic purification (eluent Et<sub>2</sub>O:petrol 50:50) a rotameric mixture (ratio 78:22) of (±)-**29** as a light yellow solid (68.0 mg, 75%); mp 74-76 °C;  $\nu_{\text{max}}$  (KBr) 3415 (N-H), 3062, 2953 (C-H), 1735 (C=O), 1670 (C=O), 1599, 1522 (N-O), 1344 (N-O); Data for major rotamer  $\delta_{\text{H}}$  (400 MHz, CDCl<sub>3</sub>) 3.66 (3H, s, CH<sub>3</sub>), 6.30 (1H, s, C(2)H), 6.53-6.56 (2H, m, ArH), 6.96-7.00 (1H, m, ArH), 7.10 (1H, t, *J* 7.3, ArH), 7.16-7.19 (1H, m, ArH), 7.23-7.32 (6H, m, ArH), 7.41-7.47 (3H, m, ArH), 7.59 (1H, d, *J* 8.1, ArH), 7.75-7.79 (1H, m, ArH), 8.16 (1H, s, NH); Selected data for minor rotamer  $\delta_{\text{H}}$  (400 MHz, CDCl<sub>3</sub>) 3.76 (3H, s, CH<sub>3</sub>), 6.52 (1H, s, C(2)H), 7.03-7.05 (2H, m, ArH), 8.04-8.07 (2H, m, ArH), 8.18 (1H, d, *J* 8.7, ArH), 8.57 (1H, s, NH); Data for both rotamers  $\delta_{\text{C}}$  (100 MHz, CDCl<sub>3</sub>) 52.7 (CH<sub>3</sub>), 52.7 (CH<sub>3</sub>), 63.5 (C(2)), 63.9 (C(2)), 114.5 (ArC), 115.0 (ArC), 122.0 (ArC), 122.1 (ArC), 122.1 (ArC), 122.9 (ArC), 123.7 (ArC), 123.7 (ArC), 124.3 (ArC), 125.3 (ArC), 125.8 (ArC), 126.2 (ArC), 126.6 (ArC), 126.8 (ArC), 127.3 (ArC), 127.4 (ArC), 127.4 (ArC), 128.2 (4ry ArC), 128.5 (ArC), 128.7 (ArC), 128.7

(ArC), 129.3 (4ry ArC), 129.8 (ArC), 130.4 (ArC), 130.4 (ArC), 130.5 (ArC), 131.7 (4ry ArC), 132.3 (4ry ArC), 133.6 (4ry ArC), 133.8 (4ry ArC), 137.5 (4ry ArC), 138.5 (4ry ArC), 148.0 (4ry ArC), 148.0 (4ry ArC), 148.5 (4ry ArC), 149.6 (4ry ArC), 164.3 (C=O), 171.6 (C=O), 172.0 (C=O), 173.5 (C=O);  $m/z$  (NSI<sup>+</sup>) 478 ([M+Na]<sup>+</sup>, 97%); HRMS (NSI<sup>+</sup>) C<sub>26</sub>H<sub>21</sub>N<sub>3</sub>NaO<sub>5</sub><sup>+</sup> ([M+Na]<sup>+</sup>) requires 478.1373; found 478.1377 (+0.7 ppm).

**(R)-methyl 2-(naphthalen-1-yl)-2-(2-(4-nitrobenzoyl)-1-phenylhydrazinyl)acetate**

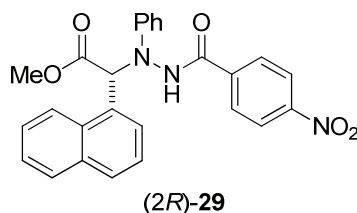

Following general procedure E, 1-naphthylacetic acid (55.9 mg, 0.30 mmol), DIPEA (78 μL, 0.45 mmol) and benzoyl chloride (52.2 μL, 0.45 mmol) in DCM (2 mL), Ph/*i*-Pr isothiourea catalyst (2*S*,3*R*)-**5** (0.62 mg, 0.002 mmol, 1 mol%), diazene **70** (51.0 mg, 0.20 mmol) and DIPEA (52 μL, 0.3 mmol) for 16 h at -78 °C followed by addition of MeOH (2 mL) and stirring for 1 h at rt gave, after chromatographic purification (eluent Et<sub>2</sub>O:petrol 50:50) a rotameric mixture (ratio 78:22) of (2*R*)-**29** as a light yellow solid (72.0 mg, 79%);  $[\alpha]_D^{20} +20.0$  (*c* 0.5, CH<sub>2</sub>Cl<sub>2</sub>); Chiral HPLC Chiralpak IA (40% IPA:hexane, flow rate 1 mL min<sup>-1</sup>, 211 nm, 20 °C)  $t_R$ (2*S*): 13.2 min,  $t_R$ (2*R*): 29.0 min, 99% *ee*.

**methyl 2-(2-(4-nitrobenzoyl)-1-phenylhydrazinyl)-2-(4-(trifluoromethyl)phenyl)acetate**

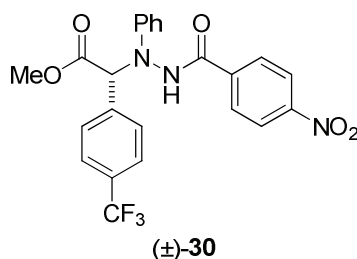

Following general procedure D, 4-trifluoromethylphenylacetic acid (61.3 mg, 0.30 mmol), DIPEA (78 μL, 0.45 mmol) and benzoyl chloride (52 μL, 0.45 mmol) in DCM (2 mL), diazene **70** (51.0 mg, 0.20 mmol), DHPB **80** (7.60 mg, 0.04 mmol) and DIPEA (52 μL, 0.3 mmol) for 1 h at rt followed by addition of MeOH (2 mL) and stirring for 1 h at rt gave, after chromatographic purification (eluent Et<sub>2</sub>O:petrol 50:50) a rotameric mixture (ratio 74:26) of (±)-**30** as a light yellow solid (74.0 mg, 78%); mp 150-152 °C;  $\nu_{\max}$  (KBr) 3412 (N-H), 3085, 2956 (C-H), 1735 (C=O), 1680 (C=O), 1600, 1524 (N-O), 1323 (N-O); Data for major rotamer  $\delta_H$  (400 MHz, CDCl<sub>3</sub>) 3.77 (3H, s, CH<sub>3</sub>), 5.83 (1H, s, C(2)*H*), 6.93-6.97 (2H, m, Ar*H*), 7.23-7.28 (2H, m, Ar*H*), 7.34-7.41 (1H, m, Ar*H*), 7.52 (4H, s, Ar*H*), 7.58-7.61 (2H, m,

ArH), 8.11-8.15 (2H, m, ArH), 8.71 (1H, s, NH); Selected data for minor rotamer  $\delta_{\text{H}}$  (400 MHz, CDCl<sub>3</sub>) 3.65 (3H, s, CH<sub>3</sub>), 5.12 (1H, s, C(2)H), 6.90-6.92 (2H, m, ArH), 7.03-7.10 (3H, m, ArH), 7.15-7.18 (2H, m, ArH), 7.78-7.81 (2H, m, ArH), 8.17 (1H, s, NH); Data for both rotamers  $\delta_{\text{C}}$  (100 MHz, CDCl<sub>3</sub>) 52.8 (CH<sub>3</sub>), 52.9 (CH<sub>3</sub>), 66.4 (C(2)), 67.9 (C(2)), 115.1 (ArC), 115.8 (ArC), 122.4 (ArC), 122.6 (ArC), 123.4 (ArC), 123.9 (ArC), 125.1 (4ry ArC), 125.6 (q, *J* 3.6, ArC), 125.7 (q, *J* 3.6, ArC), 128.2 (ArC), 128.6 (ArC), 129.4 (ArC), 129.7 (ArC), 130.2 (ArC), 130.6 (ArC), 131.0 (4ry ArC), 131.3 (4ry ArC), 136.4 (4ry ArC), 137.3 (4ry ArC), 138.1 (4ry ArC), 147.7 (4ry ArC), 148.2 (4ry ArC), 148.8 (4ry ArC), 149.9 (4ry ArC), 164.6 (C=O), 170.7 (C=O), 171.1 (C=O), 172.5 (C=O); *m/z* (NSI<sup>+</sup>) 396 ([M+Na]<sup>+</sup>, 65%); HRMS (NSI<sup>+</sup>) C<sub>23</sub>H<sub>18</sub>F<sub>3</sub>N<sub>3</sub>NaO<sub>5</sub><sup>+</sup> ([M+Na]<sup>+</sup>) requires 496.1091; found 496.1094 (+0.7 ppm).

**(R)-methyl 2-(2-(4-nitrobenzoyl)-1-phenylhydrazinyl)-2-(4-(trifluoromethyl)phenyl)acetate**

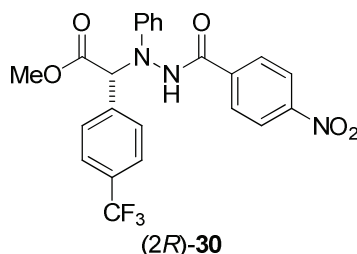

Following general procedure E, 4-trifluoromethylphenylacetic acid (61.3 mg, 0.30 mmol), DIPEA (78  $\mu\text{L}$ , 0.45 mmol) and benzoyl chloride (52.2  $\mu\text{L}$ , 0.45 mmol) in DCM (2 mL), Ph/*i*-Pr isothiourea catalyst (2*S*,3*R*)-**5** (0.62 mg, 0.002 mmol, 1 mol%), diazene **70** (51.0 mg, 0.20 mmol) and DIPEA (52  $\mu\text{L}$ , 0.3 mmol) for 16 h at -78 °C followed by addition of MeOH (2 mL) and stirring for 1 h at -78 °C gave, after chromatographic purification (eluent Et<sub>2</sub>O:petrol 50:50) a rotameric mixture (ratio 74:26) of (2*R*)-**30** as a light yellow solid (78.5 mg, 83%);  $[\alpha]_{\text{D}}^{20}$  -26.6 (*c* 0.5, CH<sub>2</sub>Cl<sub>2</sub>); Chiral HPLC Chiralpak IA (80% IPA:hexane, flow rate 1 mL min<sup>-1</sup>, 211 nm, 40 °C) *t<sub>R</sub>*(2*S*): 7.5 min, *t<sub>R</sub>*(2*R*): 17.8 min, 97% *ee*.

\* Enantiomeric excess was 92% when methanolysis carried out at rt. When the product is re-subjected to the reaction conditions at rt the *ee* drops with time.

**methyl 2-(2-benzoyl-1-(4-cyanophenyl)hydrazinyl)-2-phenylacetate**

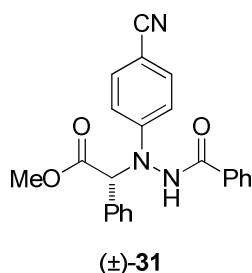

Following general procedure D, phenylacetic acid (40.9 mg, 0.30 mmol), DIPEA (78  $\mu\text{L}$ , 0.45 mmol) and benzoyl chloride (52  $\mu\text{L}$ , 0.45 mmol) in DCM (2 mL), diazene **75** (47.0 mg, 0.20 mmol), DHPB **80** (7.60 mg, 0.04 mmol) and DIPEA (52  $\mu\text{L}$ , 0.3 mmol) for 1 h at rt followed by addition of MeOH (2 mL) and stirring for 1 h at rt gave, after chromatographic purification (eluent Et<sub>2</sub>O:petrol 60:00) a rotameric mixture (ratio 94:6) of ( $\pm$ )-**31** as a white solid (52.5 mg, 68%); mp 72-74 °C;  $\nu_{\text{max}}$  (KBr) 3412 (N-H), 2954 (C-H), 2220 (C $\equiv$ N), 1748 (C=O), 1684 (C=O), 1604, 1508; Data for major rotamer  $\delta_{\text{H}}$  (300 MHz, CDCl<sub>3</sub>) 3.76 (3H, s, CH<sub>3</sub>), 5.83 (1H, s, C(2)H), 6.89-6.94 (2H, m, ArH), 7.21-7.49 (12H, m, ArH), 8.37 (1H, s, NH); Selected data for minor rotamer  $\delta_{\text{H}}$  (300 MHz, CDCl<sub>3</sub>) 3.65 (3H, s, CH<sub>3</sub>), 5.56 (1H, s, C(2)H), 6.78 (2H, dd, *J* 8.2, 1.0, ArH), 7.81 (1H, s, NH); Data for major rotamer  $\delta_{\text{C}}$  (75 MHz, CDCl<sub>3</sub>) 52.9 (CH<sub>3</sub>), 66.4 (C(2)), 103.7 (4ry ArC), 114.1 (ArC), 119.4 (C $\equiv$ N), 127.0 (ArC), 128.7 (ArC), 128.8 (ArC), 129.3 (ArC), 129.4 (ArC), 132.0 (4ry ArC), 132.1 (4ry ArC), 132.2 (ArC), 133.8 (ArC), 151.5 (4ry ArC), 166.4 (C=O), 172.2 (C=O); Selected data for minor rotamer  $\delta_{\text{C}}$  (75 MHz, CDCl<sub>3</sub>) 52.9 (CH<sub>3</sub>), 67.5 (C(2)), 115.2 (ArC), 127.3 (ArC), 127.5 (ArC), 130.4 (ArC), 134.2 (ArC); *m/z* (NSI<sup>+</sup>) 386 ([M+H]<sup>+</sup>, 100%); HRMS (NSI<sup>+</sup>) C<sub>23</sub>H<sub>20</sub>N<sub>3</sub>O<sub>3</sub><sup>+</sup> ([M+H]<sup>+</sup>) requires 386.1499; found 386.1502 (+0.7 ppm).

**(R)-methyl 2-(1-(4-methoxyphenyl)-2-(4-(trifluoromethyl)benzoyl)hydrazinyl)-2-phenylacetate**

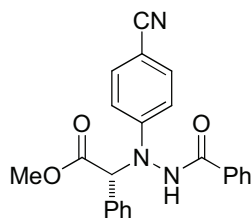

(2R)-**31**

Following general procedure E, phenylacetic acid (40.9 mg, 0.30 mmol), DIPEA (78  $\mu\text{L}$ , 0.45 mmol) and benzoyl chloride (52.2  $\mu\text{L}$ , 0.45 mmol) in DCM (2 mL), Ph/*i*-Pr isothiourea catalyst (2*S*,3*R*)-**5** (0.62 mg, 0.002 mmol, 1 mol%), diazene **75** (47.0 mg, 0.20 mmol) and DIPEA (52  $\mu\text{L}$ , 0.3 mmol) for 16 h at -78 °C followed by addition of MeOH (2 mL) and stirring for 1 h at -78 °C gave, after chromatographic purification (eluent Et<sub>2</sub>O:petrol 60:40) a rotameric mixture (ratio 94:6) of (2*R*)-**31** as a white solid (71.5 mg, 93%);  $[\alpha]_{\text{D}}^{20}$  -46.8 (*c* 0.5, CH<sub>2</sub>Cl<sub>2</sub>); Chiral HPLC Chiralpak IA (80% IPA:hexane, flow rate 1 mL min<sup>-1</sup>, 254 nm, 40 °C) *t<sub>R</sub>*(2*R*): 5.8 min, *t<sub>R</sub>*(2*S*): 12.9 min, 98% *ee*.

\* Enantiomeric excess was 91% when methanolysis carried out at rt. When the product is re-subjected to the reaction conditions at rt the *ee* drops with time.



**methyl 2-(2-benzoyl-1-(4-(trifluoromethyl)phenyl)hydrazinyl)-2-phenylacetate**

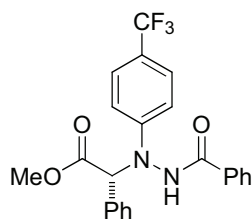

**(±)-32**

Following general procedure D, phenylacetic acid (204 mg, 1.50 mmol), DIPEA (0.39 mL, 2.25 mmol) and benzoyl chloride (0.26 mL, 2.25 mmol) in DCM (10 mL), diazene **78** (278 mg, 1.00 mmol), DHPB **80** (38.0 mg, 0.20 mmol) and DIPEA (0.26 mL, 1.5 mmol) for 1 h at rt followed by addition of MeOH (10 mL) and stirring for 1 h at rt gave, after chromatographic purification (eluent Et<sub>2</sub>O:petrol 30:70) a rotameric mixture (ratio 94:6) of (±)-**32** as a white solid (278 mg, 65%); mp 120-122 °C;  $\nu_{\max}$  (KBr) 3392 (N-H), 2952 (C-H), 1738 (C=O), 1682 (C=O), 1616; Data for major rotamer  $\delta_{\text{H}}$  (300 MHz, CDCl<sub>3</sub>) 3.82 (3H, s, CH<sub>3</sub>), 5.97 (1H, s, C(2)H), 7.07 (2H, d, *J* 8.6, ArH), 7.32-7.38 (5H, m, ArH), 7.47-7.58 (7H, m, ArH), 8.67 (1H, s, NH); Selected data for minor rotamer  $\delta_{\text{H}}$  (300 MHz, CDCl<sub>3</sub>) 3.72 (3H, s, CH<sub>3</sub>), 5.70 (1H, s, C(2)H), 8.04 (1H, s, NH); Data for major rotamer  $\delta_{\text{C}}$  (75 MHz, CDCl<sub>3</sub>) 52.7 (CH<sub>3</sub>), 66.8 (C(2)), 114.0 (ArC), 122.8 (q, *J* 32.9, 4ry ArC), 124.5 (q, *J* 269, CF<sub>3</sub>), 126.8 (q, *J* 3.5, ArC), 127.1 (ArC), 128.7 (ArC), 128.7 (ArC), 129.2 (ArC), 129.3 (ArC), 132.1 (ArC), 132.4 (4ry ArC), 132.7 (4ry ArC), 151.0 (4ry ArC), 166.6 (C=O), 172.4 (C=O); Selected data for minor rotamer  $\delta_{\text{C}}$  (75 MHz, CDCl<sub>3</sub>) 52.7 (CH<sub>3</sub>), 67.8 (C(2)), 114.9 (ArC), 127.3 (ArC), 127.7 (ArC), 130.3 (ArC), 130.8 (ArC); *m/z* (NSI<sup>+</sup>) 429 ([M+H]<sup>+</sup>, 100%); HRMS (NSI<sup>+</sup>) C<sub>23</sub>H<sub>20</sub>F<sub>3</sub>N<sub>2</sub>O<sub>3</sub><sup>+</sup> ([M+H]<sup>+</sup>) requires 429.1421; found 429.1422 (+0.3 ppm).

**(R)-methyl 2-(2-benzoyl-1-(4-(trifluoromethyl)phenyl)hydrazinyl)-2-phenylacetate**

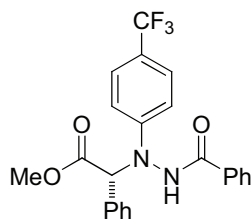

**(2R)-32**

Following general procedure E, phenylacetic acid (204 mg, 1.50 mmol), DIPEA (0.39 mL, 2.25 mmol) and benzoyl chloride (0.26 mL, 2.25 mmol) in DCM (10 mL), Ph/*i*-Pr isothiurea catalyst (2*S*,3*R*)-**5** (3.08 mg, 0.01 mmol, 1 mol%), diazene **78** (278 mg, 1.00 mmol) and DIPEA (0.26 mL, 1.5 mmol) for 16 h at -78 °C followed by addition of MeOH (10 mL) and stirring for 1 h at rt gave, after chromatographic purification (eluent Et<sub>2</sub>O:petrol 30:70) a rotameric mixture (ratio 94:6) of (2*R*)-**32** as a white solid (336 mg, 86%);  $[\alpha]_{\text{D}}^{20}$  -48.6 (*c* 0.5,



CH<sub>2</sub>Cl<sub>2</sub>); Chiral HPLC Chiralpak IA (30% IPA:hexane, flow rate 1 mL min<sup>-1</sup>, 211 nm, 20 °C)  
*t<sub>R</sub>*(2*R*): 9.0 min, *t<sub>R</sub>*(2*S*): 15.5 min, 99% *ee*.

**methyl**                    **2-(1-(4-methoxyphenyl)-2-(4-(trifluoromethyl)benzoyl)hydrazinyl)-2-phenylacetate**

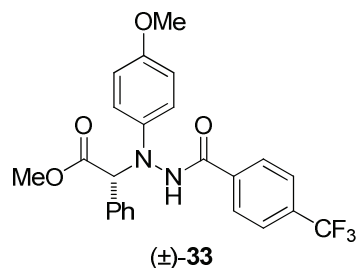

Following general procedure D, phenylacetic acid (40.9 mg, 0.30 mmol), DIPEA (78 μL, 0.45 mmol) and benzoyl chloride (52 μL, 0.45 mmol) in DCM (2 mL), diazene **79** (61.6 mg, 0.20 mmol), DHPB **80** (7.60 mg, 0.04 mmol) and DIPEA (52 μL, 0.3 mmol) for 1 h at rt followed by addition of MeOH (2 mL) and stirring for 1 h at rt gave, after chromatographic purification (eluent Et<sub>2</sub>O:petrol 50:50) a rotameric mixture (ratio 76:24) of (±)-**33** as a light yellow oil (69.3 mg, 76%); *v*<sub>max</sub> (thin film) 3283 (N-H), 2955 (C-H), 1737 (C=O), 1674 (C=O), 1511; Data for major rotamer δ<sub>H</sub> (400 MHz, CDCl<sub>3</sub>) 3.69 (3H, s, CH<sub>3</sub>), 3.72 (3H, s, CH<sub>3</sub>), 5.69 (1H, s, C(2)H), 6.77-6.79 (2H, m, ArH), 6.93-6.95 (2H, m, ArH), 7.07-7.11 (1H, m, ArH), 7.21-7.28 (3H, m, ArH), 7.37-7.39 (1H, m, ArH), 7.54 (4H, m, ArH), 8.63 (1H, s, NH); Selected data for minor rotamer δ<sub>H</sub> (400 MHz, CDCl<sub>3</sub>) 3.60 (3H, s, CH<sub>3</sub>), 3.75 (3H, s, CH<sub>3</sub>), 5.32 (1H, s, C(2)H), 6.87-6.92 (2H, m, ArH), 8.15 (1H, s, NH); Data for both rotamers δ<sub>C</sub> (100 MHz, CDCl<sub>3</sub>) 52.4 (CH<sub>3</sub>), 52.5 (CH<sub>3</sub>), 55.6 (CH<sub>3</sub>), 55.6 (CH<sub>3</sub>), 67.7 (C(2)), 69.3 (C(2)), 114.7 (ArC), 115.1 (ArC), 117.3 (ArC), 117.7 (ArC), 124.0 (q, *J* 3.8, ArC), 125.6 (q, *J* 3.5, ArC), 127.5 (ArC), 128.1 (ArC), 128.7 (ArC), 128.8 (ArC), 128.9 (ArC), 129.0 (ArC), 129.0 (ArC), 130.0 (ArC), 131.7 (4ry ArC), 132.6 (4ry ArC), 133.2 (4ry ArC), 133.5 (4ry ArC), 136.2 (4ry ArC), 136.4 (4ry ArC), 142.0 (4ry ArC), 142.4 (4ry ArC), 155.2 (4ry ArC), 158.9 (4ry ArC), 165.3 (C=O), 171.6 (C=O), 172.3 (C=O), 173.3 (C=O); *m/z* (NSI<sup>+</sup>) 459 ([M+H]<sup>+</sup>, 100%); HRMS (NSI<sup>+</sup>) C<sub>24</sub>H<sub>22</sub>F<sub>3</sub>N<sub>2</sub>O<sub>4</sub><sup>+</sup> ([M+H]<sup>+</sup>) requires 459.1526; found 459.1520 (-1.3 ppm).

**(R)-methyl 2-(1-(4-methoxyphenyl)-2-(4-(trifluoromethyl)benzoyl)hydrazinyl)-2-phenylacetate**

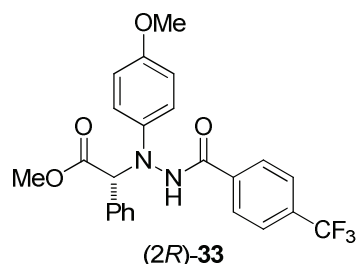

Following general procedure E, phenylacetic acid (40.9 mg, 0.30 mmol), DIPEA (78  $\mu$ L, 0.45 mmol) and benzoyl chloride (52.2  $\mu$ L, 0.45 mmol) in DCM (2 mL), Ph/*i*-Pr isothiourea catalyst (2*S*,3*R*)-**5** (0.62 mg, 0.002 mmol, 1 mol%), diazene **79** (61.6 mg, 0.20 mmol) and DIPEA (52  $\mu$ L, 0.3 mmol) for 16 h at -78 °C followed by addition of MeOH (2 mL) and stirring for 1 h at rt gave, after chromatographic purification (eluent Et<sub>2</sub>O:petrol 50:50) a rotameric mixture (ratio 76:24) of (2*R*)-**33** as a light yellow oil (68.8 mg, 75%);  $[\alpha]_D^{20}$  -34.6 (*c* 0.5, CH<sub>2</sub>Cl<sub>2</sub>); Chiral HPLC Chiralpak IA (50% IPA:hexane, flow rate 1 mL min<sup>-1</sup>, 211 nm, 20 °C) *t<sub>R</sub>*(2*R*): 19.0 min, *t<sub>R</sub>*(2*S*): 34.7 min, 99% *ee*.

*Scale-up:*

Following general procedure E, phenylacetic acid (1.33 g, 9.74 mmol), DIPEA (2.53 mL, 14.6 mmol) and benzoyl chloride (1.70 mL, 14.6 mmol) in DCM (40 mL), Ph/*i*-Pr isothiourea catalyst (2*S*,3*R*)-**5** (20.0 mg, 0.065 mmol, 1 mol%), diazene **79** (2.00 g, 6.49 mmol) and DIPEA (1.69 mL, 9.74 mmol) for 16 h at -78 °C rt followed by addition of MeOH (10 mL) and stirring for 1 h at rt gave, after chromatographic purification (eluent Et<sub>2</sub>O:petrol 50:50) a rotameric mixture (ratio 76:24) of (2*R*)-**33** as a light yellow oil (2.83 g, 95%); 99% *ee*.

**methyl 2-(4-fluorophenyl)-2-(1-(4-methoxyphenyl)-2-(4-(trifluoromethyl)benzoyl)hydrazinyl)acetate**

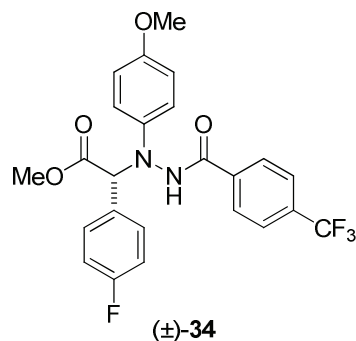

Following general procedure D, 4-fluorophenylacetic acid (231 mg, 1.50 mmol), DIPEA (0.39 mL, 2.25 mmol) and benzoyl chloride (0.26 mL, 2.25 mmol) in DCM (10 mL), diazene

**79** (308 mg, 1.00 mmol), DHPB **80** (38.0 mg, 0.20 mmol) and DIPEA (0.26 mL, 1.5 mmol) for 1 h at rt followed by addition of MeOH (10 mL) and stirring for 1 h at rt gave, after chromatographic purification (eluent Et<sub>2</sub>O:petrol 40:60) a rotameric mixture (ratio 81:19) of (±)-**34** as a white solid (347 mg, 73%); mp 68-70 °C;  $\nu_{\max}$  (KBr) 3363 (N-H), 2956 (C-H), 1741 (C=O), 1674 (C=O), 1513; Data for major rotamer  $\delta_{\text{H}}$  (400 MHz, CDCl<sub>3</sub>) 3.75 (3H, s, CH<sub>3</sub>), 3.78 (3H, s, CH<sub>3</sub>), 5.77 (1H, s, C(2)H), 6.86 (2H, d, *J* 9.0, ArH), 6.98-7.05 (4H, m, ArH), 7.47 (2H, dd, *J* 8.4, 5.3, ArH), 7.59 (2H, d, *J* 8.2, ArH), 7.66 (2H, d, *J* 8.2, ArH), 8.96 (1H, s, NH); Selected data for minor rotamer  $\delta_{\text{H}}$  (400 MHz, CDCl<sub>3</sub>) 3.68 (3H, s, CH<sub>3</sub>), 3.81 (3H, s, CH<sub>3</sub>), 5.43 (1H, s, C(2)H), 7.19 (2H, d, *J* 9.0 ArH), 7.36 (2H, d, *J* 8.1, ArH), 8.29 (1H, s, NH); Data for both rotamers  $\delta_{\text{C}}$  (75 MHz, CDCl<sub>3</sub>) 52.4 (CH<sub>3</sub>), 52.5 (CH<sub>3</sub>), 55.4 (CH<sub>3</sub>), 55.5 (CH<sub>3</sub>), 67.1 (C(2)), 68.5 (C(2)), 114.7 (ArC), 115.1 (ArC), 115.7 (d, *J* 21.7, ArC), 115.7 (d, *J* 21.7, ArC), 117.6 (ArC), 117.7 (ArC), 123.6 (q, *J* 271, CF<sub>3</sub>), 124.0 (q, *J* 3.5, ArC), 125.6 (q, *J* 3.6, ArC), 127.6 (ArC), 128.2 (ArC), 128.7 (d, *J* 3.2, 4ry ArC), 129.6 (d, *J* 3.2, 4ry ArC), 130.8 (d, *J* 8.3, ArC), 131.9 (d, *J* 8.5, ArC), 133.4 (q, *J* 32.5, 4ry ArC), 136.2 (4ry ArC), 136.2 (4ry ArC), 141.9 (4ry ArC), 142.1 (4ry ArC), 155.3 (4ry ArC), 155.7 (4ry ArC), 162.8 (d, *J* 247, 4ry ArC), 162.8 (d, *J* 248 4ry ArC), 165.4 (C=O), 171.7 (C=O), 172.0 (C=O), 172.9 (C=O); *m/z* (NSI<sup>+</sup>) 477 ([M+H]<sup>+</sup>, 100%); HRMS (NSI<sup>+</sup>) C<sub>24</sub>H<sub>21</sub>F<sub>4</sub>N<sub>2</sub>O<sub>4</sub><sup>+</sup> ([M+H]<sup>+</sup>) requires 477.1432; found 477.1420 (-2.5 ppm).

**(R)-methyl 2-(4-fluorophenyl)-2-(1-(4-methoxyphenyl)-2-(4-(trifluoromethyl)benzoyl)hydrazinyl)acetate**

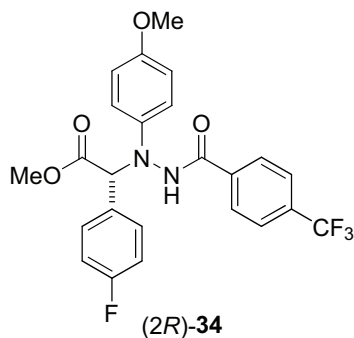

Following general procedure E, 4-fluorophenylacetic acid (231 mg, 1.50 mmol), DIPEA (0.39 mL, 2.25 mmol) and benzoyl chloride (0.26 mL, 2.25 mmol) in DCM (10 mL), Ph/*i*-Pr isothiourea catalyst (2*S*,3*R*)-**5** (3.08 mg, 0.01 mmol, 1 mol%), diazene **79** (308 mg, 1.00 mmol) and DIPEA (0.26 mL, 1.5 mmol) for 16 h at -78 °C followed by addition of MeOH (10 mL) and stirring for 1 h at rt gave, after chromatographic purification (eluent Et<sub>2</sub>O:petrol 40:60) a rotameric mixture (ratio 79:21) of (2*R*)-**34** as a white solid (377 mg, 79%);  $[\alpha]_{\text{D}}^{20}$  -43.8 (*c* 0.5, CH<sub>2</sub>Cl<sub>2</sub>); Chiral HPLC Chiralpak IA (50% IPA:hexane, flow rate 1 mL min<sup>-1</sup>, 211 nm, 20 °C) *t<sub>R</sub>*(2*S*): 17.0 min, *t<sub>R</sub>*(2*R*): 26.4 min, 99% *ee*.

**methyl 2-(1-(4-methoxyphenyl)-2-(4-(trifluoromethyl)benzoyl)hydrazinyl)-2-(naphthalen-2-yl)acetate**

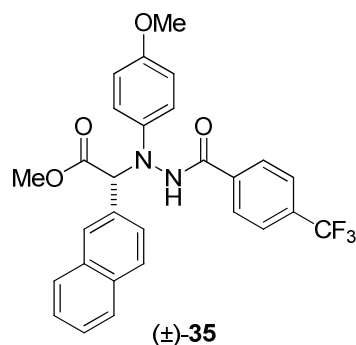

Following general procedure D, 2-naphthylacetic acid (279 mg, 1.50 mmol), DIPEA (0.39 mL, 2.25 mmol) and benzoyl chloride (0.26 mL, 2.25 mmol) in DCM (10 mL), diazene **79** (308 mg, 1.00 mmol), DHPB **80** (38.0 mg, 0.20 mmol) and DIPEA (0.26 mL, 1.5 mmol) for 1 h at rt followed by addition of MeOH (10 mL) and stirring for 1 h at rt gave, after chromatographic purification (eluent Et<sub>2</sub>O:petrol 45:55) a rotameric mixture (ratio 75:25) of (±)-**35** as a light yellow solid (302 mg, 59%); mp 74-76 °C;  $\nu_{\max}$  (KBr) 3414 (N-H), 2954 (C-H), 1735 (C=O), 1670 (C=O), 1510; Data for major rotamer  $\delta_{\text{H}}$  (300 MHz, CDCl<sub>3</sub>) 3.79 (3H, s, CH<sub>3</sub>), 3.85 (3H, s, CH<sub>3</sub>), 6.03 (1H, s, C(2)H), 6.92 (2H, d, *J* 9.0, ArH), 7.16 (2H, d, *J* 9.1, ArH), 7.48-7.59 (6H, m, ArH), 7.73-7.93 (5H, m, ArH), 9.07 (1H, s, NH); Selected data for minor rotamer  $\delta_{\text{H}}$  (300 MHz, CDCl<sub>3</sub>) 3.76 (3H, s, CH<sub>3</sub>), 3.85 (3H, s, CH<sub>3</sub>), 5.68 (1H, s, C(2)H), 6.77 (2H, d, *J* 8.1 ArH), 7.04 (2H, d, *J* 9.0, ArH), 7.29 (2H, d, *J* 9.0, ArH), 7.66 (2H, d, *J* 8.3, ArH), 8.42 (1H, s, NH); Data for both rotamers  $\delta_{\text{C}}$  (75 MHz, CDCl<sub>3</sub>) 52.5 (CH<sub>3</sub>), 52.6 (CH<sub>3</sub>), 55.5 (CH<sub>3</sub>), 55.6 (CH<sub>3</sub>), 68.1 (C(2)), 69.2 (C(2)), 114.7 (ArC), 115.2 (ArC), 117.6 (ArC), 117.8 (ArC), 123.8 (q, *J* 3.5, ArC), 125.5 (q, *J* 3.6, ArC), 126.5 (ArC), 126.6 (ArC), 126.7 (ArC), 126.7 (ArC), 126.7 (ArC), 126.8 (ArC), 127.2 (ArC), 127.5 (ArC), 127.8 (ArC), 127.9 (ArC), 128.1 (ArC), 128.2 (ArC), 128.2 (ArC), 128.4 (ArC), 128.6 (ArC), 129.9 (4ry ArC), 130.1 (ArC), 131.3 (4ry ArC), 133.0 (4ry ArC), 133.1 (4ry ArC), 133.3 (4ry ArC), 133.4 (4ry ArC), 136.0 (4ry ArC), 136.4 (4ry ArC), 142.2 (4ry ArC), 142.4 (4ry ArC), 155.3 (4ry ArC), 155.6 (4ry ArC), 165.5 (C=O), 171.7 (C=O), 172.1 (C=O), 173.1 (C=O); *m/z* (NSI<sup>+</sup>) 509 ([M+H]<sup>+</sup>, 100%); HRMS (NSI<sup>+</sup>) C<sub>28</sub>H<sub>24</sub>F<sub>3</sub>N<sub>2</sub>O<sub>4</sub><sup>+</sup> ([M+H]<sup>+</sup>) requires 509.1683; found 509.1680 (-0.5 ppm).

**(R)-methyl 2-(1-(4-methoxyphenyl)-2-(4-(trifluoromethyl)benzoyl)hydrazinyl)-2-(naphthalen-2-yl)acetate**

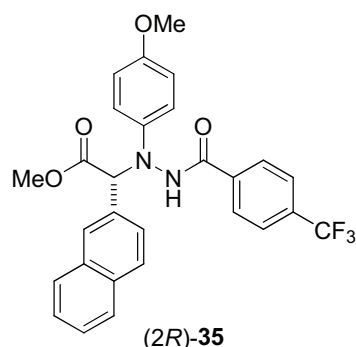

Following general procedure E, 2-naphthylacetic acid (279 mg, 1.50 mmol), DIPEA (0.39 mL, 2.25 mmol) and benzoyl chloride (0.26 mL, 2.25 mmol) in DCM (10 mL), Ph/*i*-Pr isothiourea catalyst (2*S*,3*R*)-5 (3.08 mg, 0.01 mmol, 1 mol%), diazene **79** (308 mg, 1.00 mmol) and DIPEA (0.26 mL, 1.5 mmol) for 16 h at -78 °C followed by addition of MeOH (10 mL) and stirring for 1 h at rt gave, after chromatographic purification (eluent Et<sub>2</sub>O:petrol 45:55) a rotameric mixture (ratio 70:30) of (2*R*)-**35** as a light yellow solid (408 mg, 80%);  $[\alpha]_D^{20}$  -75.8 (*c* 0.5, CH<sub>2</sub>Cl<sub>2</sub>); Chiral HPLC Chiralpak IB (20% IPA:hexane, flow rate 1 mL min<sup>-1</sup>, 211 nm, 20 °C) *t*<sub>R</sub>(2*S*): 12.5 min, *t*<sub>R</sub>(2*R*): 14.5 min, 98% *ee*.

**methyl 2-(2-(4-nitrobenzoyl)-1-phenylhydrazinyl)-2-(phenylthio)acetate**

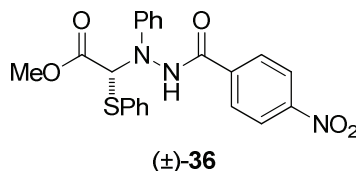

Following general procedure D, (phenylthio)acetic acid (50.5 mg, 0.30 mmol), DIPEA (78 μL, 0.45 mmol) and benzoyl chloride (52 μL, 0.45 mmol) in DCM (2 mL), diazene **70** (51.0 mg, 0.20 mmol), DHPB **80** (7.60 mg, 0.04 mmol) and DIPEA (52 μL, 0.3 mmol) for 1 h at rt followed by addition of MeOH (2 mL) and stirring for 1 h at rt gave, after chromatographic purification (eluent Et<sub>2</sub>O:petrol 50:50) a rotameric mixture (ratio 87:13) of (±)-**36** as an orange oil (62.8 mg, 72%); *v*<sub>max</sub> (Diamond Cell) 3269 (N-H), 3061, 2953 (C-H), 1736 (C=O), 1682 (C=O), 1597, 1523 (N-O), 1348 (N-O); Data for major rotamer  $\delta_H$  (300 MHz, CDCl<sub>3</sub>) 3.70 (3H, s, CH<sub>3</sub>), 5.69 (1H, s, C(2)H), 6.82-6.91 (3H, m, ArH), 7.13-7.25 (5H, m, ArH), 7.60-7.64 (2H, m, ArH), 7.95-8.00 (2H, m, ArH), 8.22-8.25 (2H, m, ArH), 8.81 (1H, s, NH); Selected data for minor rotamer  $\delta_H$  (300 MHz, CDCl<sub>3</sub>) 3.57 (3H, s, CH<sub>3</sub>), 5.60 (1H, s, C(2)H), 7.50 (2H, d, *J* 8.8, ArH), 7.83 (2H, d, *J* 8.8, ArH), 8.17 (1H, s, NH); Data for major rotamer  $\delta_C$  (100 MHz, CDCl<sub>3</sub>) 53.1 (CH<sub>3</sub>), 72.1 (C(2)), 115.7 (ArC), 122.7 (ArC), 124.0 (ArC), 128.8 (ArC), 129.1 (ArC), 129.4 (ArC), 129.5 (ArC), 132.6 (4ry ArC), 133.7 (ArC), 138.6 (4ry ArC),

146.8 (4ry *ArC*), 150.0 (4ry *ArC*), 165.2 (C=O), 169.7 (C=O); Selected data for minor rotamer  $\delta_C$  (100 MHz, CDCl<sub>3</sub>) 53.1 (CH<sub>3</sub>), 72.3 (C(2)), 116.4 (*ArC*), 122.8 (*ArC*), 123.8 (*ArC*), 127.3 (*ArC*), 127.8 (*ArC*), 130.2 (*ArC*), 139.4 (4ry *ArC*), 147.5 (4ry *ArC*), 168.6 (C=O), 172.4 (C=O); *m/z* (ES<sup>+</sup>) 460 ([M+Na]<sup>+</sup>, 100%); HRMS (ES<sup>+</sup>) C<sub>22</sub>H<sub>19</sub>N<sub>3</sub>NaO<sub>5</sub>S<sup>+</sup> ([M+Na]<sup>+</sup>) requires 460.0943; found 460.0932 (-2.4 ppm).

**(R)-methyl 2-(2-(4-nitrobenzoyl)-1-phenylhydrazinyl)-2-(phenylthio)acetate**

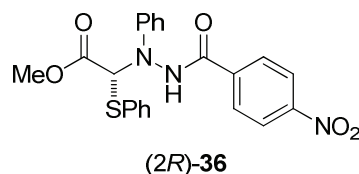

Following general procedure E, (phenylthio)acetic acid (50.5 mg, 0.30 mmol), DIPEA (78  $\mu$ L, 0.45 mmol) and benzoyl chloride (52.2  $\mu$ L, 0.45 mmol) in DCM (2 mL), Ph/*i*-Pr isothioureia catalyst (2*S*,3*R*)-5 (0.62 mg, 0.002 mmol, 1 mol%), diazene **70** (51.0 mg, 0.20 mmol) and DIPEA (52  $\mu$ L, 0.3 mmol) for 16 h at -78 °C followed by addition of MeOH (2 mL) and stirring for 1 h at -78 °C gave, after chromatographic purification (eluent Et<sub>2</sub>O:petrol 50:50) a rotameric mixture (ratio 87:13) of (2*R*)-**36** as an orange oil (72.7 mg, 83%);  $[\alpha]_D^{20} +5.0$  (*c* 0.2, CH<sub>2</sub>Cl<sub>2</sub>); Chiral HPLC Chiralpak IA (40% IPA:hexane, flow rate 1 mL min<sup>-1</sup>, 211 nm, 30 °C) *t<sub>R</sub>*(2*R*): 13.1 min, *t<sub>R</sub>*(2*S*): 20.2 min, 98% *ee*.

**methyl 2-methoxy-2-(2-(4-nitrobenzoyl)-1-phenylhydrazinyl)acetate**

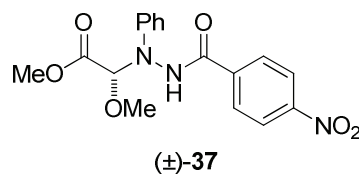

Following general procedure D, methoxyacetic acid (23.0  $\mu$ L, 0.30 mmol), DIPEA (78  $\mu$ L, 0.45 mmol) and benzoyl chloride (52  $\mu$ L, 0.45 mmol) in DCM (2 mL), diazene **70** (51.0 mg, 0.20 mmol), DHPB **80** (7.60 mg, 0.04 mmol) and PS-BEMP (227 mg, 0.5 mmol) for 1 h at rt followed by addition of MeOH (2 mL) and stirring for 1 h at rt gave, after chromatographic purification (eluent Et<sub>2</sub>O:petrol 70:30) a rotameric mixture (ratio 94:6) of (±)-**37** as an orange solid (38.9 mg, 54%); mp 122-124 °C;  $\nu_{\max}$  (Diamond Cell) 3278 (N-H), 3071, 2960 (C-H), 1748 (C=O), 1676 (C=O), 1597, 1525 (N-O), 1346 (N-O); Data for major rotamer  $\delta_H$  (400 MHz, CDCl<sub>3</sub>) 3.56 (3H, s, CH<sub>3</sub>), 3.73 (3H, s, CH<sub>3</sub>), 5.28 (1H, s, C(2)*H*), 6.93-7.00 (3H, m, *ArH*), 7.22-7.26 (2H, m, *ArH*), 7.93-7.96 (2H, m, *ArH*), 8.21-8.24 (2H, m, *ArH*), 8.41 (1H, s, *NH*); Selected data for minor rotamer  $\delta_H$  (400 MHz, CDCl<sub>3</sub>) 3.45 (3H, s, CH<sub>3</sub>), 3.67 (3H, s, CH<sub>3</sub>), 4.93 (1H, s, C(2)*H*); Data for major rotamer  $\delta_C$  (100 MHz, CDCl<sub>3</sub>) 53.0 (CH<sub>3</sub>), 57.5 (CH<sub>3</sub>), 89.3 (C(2)), 115.8 (*ArC*), 122.8 (*ArC*), 124.0 (*ArC*), 128.7 (*ArC*), 129.5 (*ArC*), 138.4

(4ry *ArC*), 146.2 (4ry *ArC*), 150.0 (4ry *ArC*), 165.2 (C=O), 168.3 (C=O); Selected data for minor rotamer  $\delta_C$  (100 MHz, CDCl<sub>3</sub>) 53.4 (CH<sub>3</sub>), 90.7 (C(2)), 114.0 (*ArC*), 121.9 (*ArC*), 127.3 (*ArC*);  $m/z$  (ES<sup>+</sup>) 382 ([M+Na]<sup>+</sup>, 100%); HRMS (ES<sup>+</sup>) C<sub>17</sub>H<sub>17</sub>N<sub>3</sub>NaO<sub>6</sub><sup>+</sup> ([M+Na]<sup>+</sup>) requires 382.1015; found 382.1023 (+2.0 ppm).

**(R)-methyl 2-methoxy-2-(2-(4-nitrobenzoyl)-1-phenylhydrazinyl)acetate**

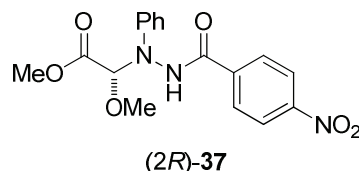

Following general procedure E, methoxyacetic acid (23.0  $\mu$ L, 0.30 mmol), DIPEA (78  $\mu$ L, 0.45 mmol) and benzoyl chloride (52.2  $\mu$ L, 0.45 mmol) in DCM (2 mL), Ph/*i*-Pr isothiourea catalyst (2*S*,3*R*)-**5** (6.16 mg, 0.02 mmol, 10 mol%), diazene **70** (51.0 mg, 0.20 mmol) and PS-BEMP (227 mg, 0.5 mmol) for 16 h at rt followed by addition of MeOH (2 mL) and stirring for 1 h at rt gave, after chromatographic purification (eluent Et<sub>2</sub>O:petrol 70:30) a rotameric mixture (ratio 95:5) of (2*R*)-**37** as an orange solid (38.7 mg, 54%);  $[\alpha]_D^{20} +15.5$  (*c* 0.2, CH<sub>2</sub>Cl<sub>2</sub>); Chiral HPLC Chiralpak AD-H (20% IPA:hexane, flow rate 1 mL min<sup>-1</sup>, 211 nm, 30 °C)  $t_R$ (2*S*): 22.4 min,  $t_R$ (2*R*): 24.7 min, 83% *ee*.

**methyl 2-(2-(4-nitrobenzoyl)-1-phenylhydrazinyl)-3-phenylpropanoate**

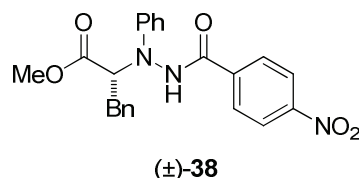

Following general procedure D, 3-phenylpropionic acid (45.1 mg, 0.30 mmol), DIPEA (78  $\mu$ L, 0.45 mmol) and benzoyl chloride (52  $\mu$ L, 0.45 mmol) in DCM (2 mL), diazene **70** (51.0 mg, 0.20 mmol), DHPB **80** (7.60 mg, 0.04 mmol) and PS-BEMP (227 mg, 0.5 mmol) for 1 h at rt followed by addition of MeOH (2 mL) and stirring for 1 h at rt gave, after chromatographic purification (eluent Et<sub>2</sub>O:petrol 35:65) a rotameric mixture (ratio 90:10) of (±)-**38** as a light yellow solid (44.3 mg, 53%); mp 42-44 °C;  $\nu_{max}$  (Diamond Cell) 3279 (N-H), 3065, 2943 (C-H), 1728 (C=O), 1686 (C=O), 1597, 1522 (N-O), 1344 (N-O); Data for major rotamer  $\delta_H$  (400 MHz, CDCl<sub>3</sub>) 3.10 (1H, dd, *J* 13.6, 8.2, *CHH*), 3.39 (1H, dd, *J* 13.6, 6.1, *CHH*), 3.52 (3H, s, CH<sub>3</sub>), 4.71 (1H, dd, *J* 8.2, 6.1 *CH*), 6.83-6.92 (3H, m, *ArH*), 7.16-7.26 (7H, m, *ArH*), 7.99-8.02 (2H, m, *ArH*), 8.26-8.29 (2H, m, *ArH*), 8.86 (1H, s, *NH*); Selected data for minor rotamer  $\delta_H$  (400 MHz, CDCl<sub>3</sub>) 3.47 (3H, s, CH<sub>3</sub>), 7.42 (2H, d, *J* 8.9, *ArH*), 8.20 (1H, s, *NH*); Data for major rotamer  $\delta_C$  (100 MHz, CDCl<sub>3</sub>) 37.1 (CH<sub>2</sub>), 52.1 (CH<sub>3</sub>), 65.2 (C(2)), 115.3 (*ArC*), 122.3 (*ArC*), 124.1 (*ArC*), 127.2 (*ArC*), 128.6 (*ArC*), 128.7 (*ArC*), 129.2

(ArC), 129.5 (ArC), 136.5 (4ry ArC), 138.2 (4ry ArC), 147.9 (4ry ArC), 150.1 (4ry ArC), 164.8 (C=O), 174.2 (C=O); Selected data for minor rotamer  $\delta_{\text{C}}$  (100 MHz, CDCl<sub>3</sub>) 35.6 (CH<sub>2</sub>), 52.1 (CH<sub>3</sub>), 66.3 (C(2)), 116.4 (ArC), 122.8 (ArC), 128.2 (ArC), 128.5 (ArC), 130.0 (ArC);  $m/z$  (ES<sup>+</sup>) 442 ([M+Na]<sup>+</sup>, 100%); HRMS (ES<sup>+</sup>) C<sub>23</sub>H<sub>21</sub>N<sub>3</sub>NaO<sub>5</sub><sup>+</sup> ([M+Na]<sup>+</sup>) requires 442.1379; found 442.1363 (-3.6 ppm).

**(R)-methyl 2-(2-(4-nitrobenzoyl)-1-phenylhydrazinyl)-3-phenylpropanoate**

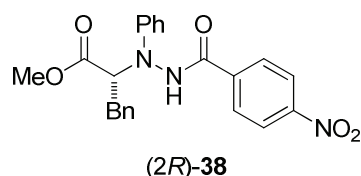

Following general procedure E, 3-phenylpropionic acid (45.1 mg, 0.30 mmol), DIPEA (78  $\mu$ L, 0.45 mmol) and benzoyl chloride (52.2  $\mu$ L, 0.45 mmol) in DCM (2 mL), Ph/*i*-Pr isothiourea catalyst (2*S*,3*R*)-5 (6.16 mg, 0.02 mmol, 10 mol%), diazene **70** (51.0 mg, 0.20 mmol) and PS-BEMP (227 mg, 0.5 mmol) for 16 h at rt followed by addition of MeOH (2 mL) and stirring for 1 h at rt gave, after chromatographic purification (eluent Et<sub>2</sub>O:petrol 40:60) a rotameric mixture (ratio 90:10) of (2*R*)-**38** as a light yellow solid (51.8 mg, 62%);  $[\alpha]_{\text{D}}^{20}$  -28.4 (*c* 0.5, CH<sub>2</sub>Cl<sub>2</sub>); Chiral HPLC Chiralpak IA (40% IPA:hexane, flow rate 1 mL min<sup>-1</sup>, 211 nm, 30 °C)  $t_{\text{R}}$ (2*R*): 9.8 min,  $t_{\text{R}}$ (2*S*): 18.1 min, 99% *ee*.

**N'-(2-hydroxy-1-(*p*-tolyl)ethyl)-N'-phenylbenzohydrazide**

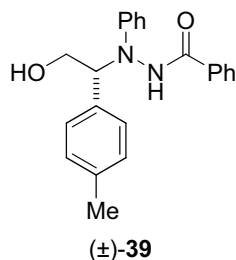

To a solution of (±)-**6** (68.4 mg, 0.20 mmol) in THF (1 mL) was added 2M LiAlH<sub>4</sub> (1.0 mL, 2.0 mmol) and the reaction mixture was allowed to stir at rt for 10 mins. The reaction mixture was quenched by addition of sat. aq. NH<sub>4</sub>Cl and extracted with Et<sub>2</sub>O. The organic layer was dried (MgSO<sub>4</sub>), filtered and concentrated *in vacuo*. Chromatographic purification (eluent Et<sub>2</sub>O:petrol 60:40) gave (±)-**39** as a white solid (67.8 mg, 98%); mp 148-150 °C;  $\nu_{\text{max}}$  (KBr) 3551 (O-H), 3412 (N-H), 2933 (C-H), 1662 (C=O), 1597, 1497;  $\delta_{\text{H}}$  (500 MHz, CDCl<sub>3</sub>) 2.23 (3H, s, CH<sub>3</sub>), 3.78 (1H, td, *J* 11.7, 3.6, C(2)HH), 3.94 (1H, t, *J* 10.5, C(2)HH), 4.61 (1H, br s, OH), 5.18 (1H, d, *J* 7.2, C(1)H), 6.82 (1H, t, *J* 7.3, ArH), 6.94 (2H, d, *J* 8.1, ArH), 7.02-7.05 (4H, m, ArH), 7.17-7.20 (2H, m, ArH), 7.41 (2H, t, *J* 7.6 ArH), 7.51 (1H, t, *J* 7.4, ArH), 7.74 (2H, d, *J* 7.6, ArH);  $\delta_{\text{C}}$  (125 MHz, CDCl<sub>3</sub>) 21.1 (CH<sub>3</sub>), 61.2 (C(2)), 65.2 (C(1)), 114.2 (ArC),



120.6 (*ArC*), 127.3 (*ArC*), 127.5 (*ArC*), 129.0 (*ArC*), 129.5 (*ArC*), 129.7 (*ArC*), 131.8 (4ry *ArC*), 132.4 (4ry *ArC*), 132.7 (*ArC*), 138.3 (4ry *ArC*), 148.6 (4ry *ArC*), 168.7 (C=O); *m/z* (NSI<sup>+</sup>) 347 ([M+H]<sup>+</sup>, 35%); HRMS (NSI<sup>+</sup>) C<sub>22</sub>H<sub>23</sub>N<sub>2</sub>O<sub>2</sub><sup>+</sup> ([M+H]<sup>+</sup>) requires 347.1754; found 347.1760 (+1.7 ppm).

**(R)-N'-(2-hydroxy-1-(p-tolyl)ethyl)-N'-phenylbenzohydrazide**

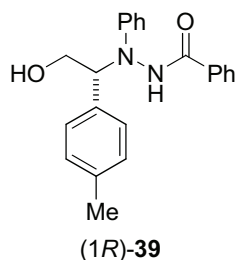

To a solution of (2R)-6 (33.9 mg, 0.10 mmol) in THF (1 mL) was added 2M LiAlH<sub>4</sub> (0.5 mL, 1.0 mmol) and the reaction mixture was allowed to stir at rt for 10 mins. The reaction mixture was quenched by addition of sat. aq. NH<sub>4</sub>Cl and extracted with Et<sub>2</sub>O. The organic layer was dried (MgSO<sub>4</sub>), filtered and concentrated *in vacuo*. Chromatographic purification (eluent Et<sub>2</sub>O:petrol 60:40) gave (±)-39 as a white solid (33.6 mg, 97%); [α]<sub>D</sub><sup>20</sup> -73.2 (*c* 0.25, CH<sub>2</sub>Cl<sub>2</sub>); Chiral HPLC Chiralpak AD-H (30% IPA:hexane, flow rate 1 mL min<sup>-1</sup>, 254 nm, 30 °C) *t*<sub>R</sub>(1R): 7.4 min, *t*<sub>R</sub>(1S): 10.7 min, >99% *ee*.

**methyl 2-((4-methoxyphenyl)amino)-2-phenylacetate**

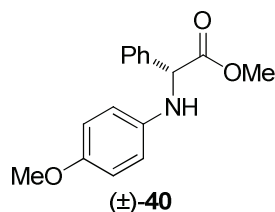

Following general procedure F, ester (±)-33 (400 mg, 0.88 mmol) and 0.1M SmI<sub>2</sub> (26.4 mL, 2.64 mmol) in MeOH (10 mL) gave, after chromatographic purification (eluent Et<sub>2</sub>O:petrol 20:80) (±)-40 as a light yellow solid (167 mg, 70%); mp 104-106 °C; {lit.<sup>8</sup> mp 107-108 °C}; δ<sub>H</sub>(300 MHz, CDCl<sub>3</sub>) 3.73 (3H, s, CH<sub>3</sub>), 3.75 (3H, s, CH<sub>3</sub>), 4.69 (1H, br s, NH), 5.05 (1H, s, C(2)H), 6.54-6.59 (2H, m, ArH), 6.72-6.76 (2H, m, ArH), 7.33-7.41 (3H, m, ArH), 7.50-7.53 (2H, m, ArH).

**(R)-methyl 2-((4-methoxyphenyl)amino)-2-phenylacetate**

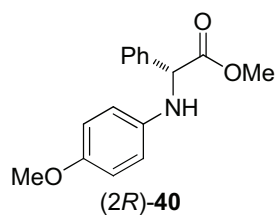

Following general procedure F, ester (2R)-33 (229 mg, 0.50 mmol) and 0.1M SmI<sub>2</sub> (15.0 mL, 1.50 mmol) in MeOH (5 mL) gave, after chromatographic purification (eluent Et<sub>2</sub>O:petrol 20:80) (2R)-40 as a colourless oil (112 mg, 83%); [ $\alpha$ ]<sub>D</sub><sup>20</sup> -99.2 (*c* 0.125, CHCl<sub>3</sub>); {lit.<sup>9</sup> [ $\alpha$ ]<sub>D</sub><sup>20</sup> +97.6 (*c* 1.29 in CHCl<sub>3</sub>) for a 98% ee sample (2S)-configuration}; Chiral HPLC Chiralcel OJ-H (30% IPA:hexane, flow rate 1 mL min<sup>-1</sup>, 220 nm, 30 °C) t<sub>R</sub>(2R): 28.1 min, t<sub>R</sub>(2S): 30.9 min, 99% ee.

\* Enantiomeric excess was 91% when reaction carried out at rt.

**methyl 2-(4-fluorophenyl)-2-((4-methoxyphenyl)amino)acetate**

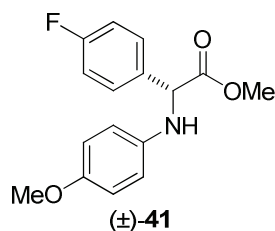

Following general procedure F, ester (±)-34 (238 mg, 0.50 mmol) and 0.1M SmI<sub>2</sub> (15.0 mL, 1.50 mmol) in MeOH (5 mL) gave, after chromatographic purification (eluent Et<sub>2</sub>O:petrol 25:75) (±)-41 as a light yellow solid (107.9 mg, 75%); mp 102-104 °C; {lit.<sup>8</sup> mp 99-100 °C};  $\delta$ <sub>H</sub> (300 MHz, CDCl<sub>3</sub>) 3.64 (3H, s, CH<sub>3</sub>), 3.66 (3H, s, CH<sub>3</sub>), 4.60 (1H, br s, NH), 4.92 (1H, s, C(2)H), 6.42-6.45 (2H, m, ArH), 6.64-6.67 (2H, m, ArH), 6.94-7.00 (2H, m, ArH), 7.37-7.42 (2H, m, ArH).

**(R)-methyl 2-(4-fluorophenyl)-2-((4-methoxyphenyl)amino)acetate**

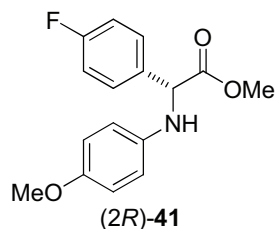

Following general procedure F, ester (2R)-34 (238 mg, 0.50 mmol) and 0.1M SmI<sub>2</sub> (15.0 mL, 1.50 mmol) in MeOH (5 mL) gave, after chromatographic purification (eluent Et<sub>2</sub>O:petrol 25:75) (2R)-41 as a light yellow solid (110 mg, 76%); [ $\alpha$ ]<sub>D</sub><sup>20</sup> -86.8 (*c* 0.25, CH<sub>2</sub>Cl<sub>2</sub>); {lit.<sup>9</sup> [ $\alpha$ ]<sub>D</sub><sup>20</sup> +70.4 (*c* 1.40 in CHCl<sub>3</sub>) for a 93% ee sample (2S)-configuration}; Chiral HPLC

Chiralpak AD-H (10% IPA:hexane, flow rate 1 mL min<sup>-1</sup>, 211 nm, 30 °C)  $t_R(2S)$ : 13.7 min,  $t_R(2R)$ : 15.9 min, 98% *ee*.

**methyl 2-((4-methoxyphenyl)amino)-2-(naphthalen-2-yl)acetate**

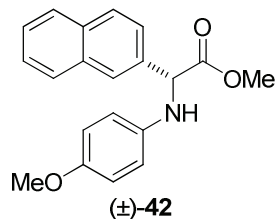

Following general procedure F, ester (±)-**35** (254 mg, 0.50 mmol) and 0.1M SmI<sub>2</sub> (15.0 mL, 1.50 mmol) in MeOH (5 mL) gave, after chromatographic purification (eluent Et<sub>2</sub>O:petrol 25:75) (±)-**42** as a light yellow oil (111 mg, 69%);  $\delta_H$  (300 MHz, CDCl<sub>3</sub>) 3.59 (3H, s, CH<sub>3</sub>), 3.62 (3H, s, CH<sub>3</sub>), 4.73 (1H, br s, NH), 5.09 (1H, s, C(2)H), 6.47-6.51 (2H, m, ArH), 6.59-6.65 (2H, m, ArH), 7.36-7.41 (2H, m, ArH), 7.51 (1H, dd, *J* 8.6, 1.8, ArH), 7.71-7.76 (3H, m, ArH), 7.87 (1H, s, ArH).

**(R)-methyl 2-((4-methoxyphenyl)amino)-2-(naphthalen-2-yl)acetate**

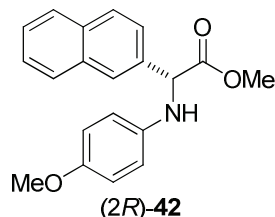

Following general procedure F, ester (2R)-**35** (254 mg, 0.50 mmol) and 0.1M SmI<sub>2</sub> (15.0 mL, 1.50 mmol) in MeOH (5 mL) gave, after chromatographic purification (eluent Et<sub>2</sub>O:petrol 25:75) (2R)-**42** as a colourless oil (131 mg, 82%);  $[\alpha]_D^{20}$  -180.4 (*c* 0.25, CH<sub>2</sub>Cl<sub>2</sub>); {lit.<sup>9</sup>  $[\alpha]_D^{20}$  +130.6 (*c* 1.60 in CHCl<sub>3</sub>) for a 97% *ee* sample (2S)-configuration}; Chiral HPLC Chiralcel OJ-H (30% IPA:hexane, flow rate 1 mL min<sup>-1</sup>, 220 nm, 30 °C)  $t_R(2R)$ : 30.4 min,  $t_R(2S)$ : 33.0 min, 98% *ee*.

**methyl 2-phenyl-2-(phenylamino)acetate**

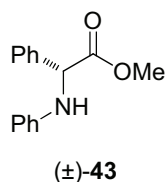

Following general procedure F, ester (±)-**4** (150 mg, 0.42 mmol) and 0.1M SmI<sub>2</sub> (12.5 mL, 1.25 mmol) in MeOH (5 mL) gave, after chromatographic purification (eluent Et<sub>2</sub>O:petrol 25:75) (±)-**43** as a white solid (59.8 mg, 60%); mp 73-74 °C; {lit.<sup>12</sup> mp 79-80 °C};  $\delta_H$  (300

MHz, CDCl<sub>3</sub>) 3.63 (3H, s, CH<sub>3</sub>), 4.87 (1H, d, *J* 5.7, NH), 5.00 (1H, d, *J* 5.9, C(2)*H*), 6.47 (2H, dd, *J* 8.6, 0.9, Ar*H*), 6.58-6.64 (1H, m, Ar*H*), 7.00-7.06 (2H, m, Ar*H*), 7.21-7.29 (3H, m, Ar*H*), 7.39-7.43 (2H, m, Ar*H*).

**(R)-methyl 2-phenyl-2-(phenylamino)acetate**

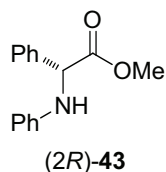

Following general procedure F, ester (2*R*)-**4** (180 mg, 0.50 mmol) and 0.1M SmI<sub>2</sub> (15.0 mL, 1.50 mmol) in MeOH (5 mL) gave, after chromatographic purification (eluent Et<sub>2</sub>O:petrol 25:75) (2*R*)-**43** as a colourless oil (109.7 mg, 91%); [α]<sub>D</sub><sup>20</sup> -51.5 (*c* 0.2, CH<sub>2</sub>Cl<sub>2</sub>); {lit.<sup>9</sup> [α]<sub>D</sub><sup>20</sup> +49.9 (*c* 0.9 in CHCl<sub>3</sub>) for a 97% ee sample (2*S*)-configuration}; Chiral HPLC Chiralcel OD-H (1% IPA:hexane, flow rate 1 mL min<sup>-1</sup>, 211 nm, 30 °C) t<sub>R</sub>(2*S*): 23.7 min, t<sub>R</sub>(2*R*): 26.1 min, 99% ee.

**methyl 2-phenyl-2-((4-(trifluoromethyl)phenyl)amino)acetate**

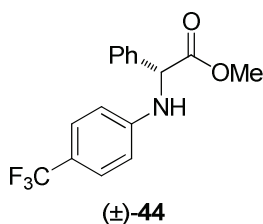

Following general procedure F, ester (±)-**32** (214 mg, 0.50 mmol) and 0.1M SmI<sub>2</sub> (15.0 mL, 1.50 mmol) in MeOH (5 mL) gave, after chromatographic purification (eluent Et<sub>2</sub>O:petrol 25:75) (±)-**44** as a colourless oil (133 mg, 86%); δ<sub>H</sub> (300 MHz, CDCl<sub>3</sub>) 3.66 (3H, s, CH<sub>3</sub>), 5.01 (1H, d, *J* 5.7, C(2)*H*), 5.28 (1H, d, *J* 5.5, NH), 6.47 (2H, d, *J* 8.5, Ar*H*), 7.23-7.31 (5H, m, Ar*H*), 7.37-7.40 (2H, m, Ar*H*).

**(R)-methyl 2-phenyl-2-((4-(trifluoromethyl)phenyl)amino)acetate**

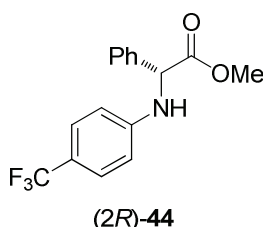

Following general procedure F, ester (2*R*)-**32** (214 mg, 0.50 mmol) and 0.1M SmI<sub>2</sub> (15.0 mL, 1.50 mmol) in MeOH (5 mL) gave, after chromatographic purification (eluent Et<sub>2</sub>O:petrol 25:75) (2*R*)-**44** as a colourless oil (117 mg, 76%); [α]<sub>D</sub><sup>20</sup> -98.0 (*c* 0.25, CH<sub>2</sub>Cl<sub>2</sub>); Chiral HPLC

Chiralcel OD-H (1% IPA:hexane, flow rate 1 mL min<sup>-1</sup>, 211 nm, 30 °C) t<sub>R</sub>(2R): 13.6 min, t<sub>R</sub>(2S): 14.7 min, 98% *ee*.

#### methyl 2-amino-2-phenylacetate

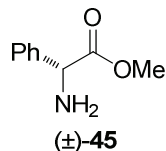

To a solution of PMP protected amine (±)-40 (84.0 mg, 0.31 mmol) in MeCN:H<sub>2</sub>O (1:1, 10 mL) was added periodic acid (70.5 mg, 0.31 mmol) and 1M H<sub>2</sub>SO<sub>4</sub> (0.31 mL, 0.31 mmol) and the reaction mixture was allowed to stue for 16 h at rt. The reaction mixture was washed with CH<sub>2</sub>Cl<sub>2</sub>. The aqueous layer was retained, basified with sat. aq. NaHCO<sub>3</sub> and extracted twice with ethyl acetate. The combined organics were dried (MgSO<sub>4</sub>), filtered and concentrated *in vacuo* to give (±)-45 as a yellow oil (16.0 mg, 31%); δ<sub>H</sub> (300 MHz, CDCl<sub>3</sub>) 1.97 (2H, br s, NH<sub>2</sub>), 3.63 (3H, s, CH<sub>3</sub>), 4.55 (1H, s, C(2)H), 7.23-7.30 (5H, m, ArH).

#### (R)-methyl 2-amino-2-phenylacetate

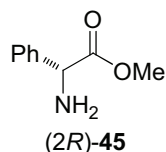

To a solution of PMP protected amine (2R)-40 (34.5 mg, 0.13 mmol) in MeCN:H<sub>2</sub>O (1:1, 10 mL) was added periodic acid (28.9 mg, 0.13 mmol) and 1M H<sub>2</sub>SO<sub>4</sub> (0.13 mL, 0.13 mmol) and the reaction mixture was allowed to stir for 16 h at rt. The reaction mixture was washed with CH<sub>2</sub>Cl<sub>2</sub>. The aqueous layer was retained, basified with sat. aq. NaHCO<sub>3</sub> and extracted twice with ethyl acetate. The combined organics were dried (MgSO<sub>4</sub>), filtered and concentrated *in vacuo* to give (2R)-45 as a yellow oil (9.8 mg, 47%); [α]<sub>D</sub><sup>20</sup> -192 (c 0.025, CH<sub>2</sub>Cl<sub>2</sub>); {lit.<sup>10</sup> [α]<sub>D</sub><sup>20</sup> +202.3 (c 0.49 in CHCl<sub>3</sub>) for a 91% *ee* sample (2S)-configuration}.

#### methyl 2-acetamido-2-phenylacetate

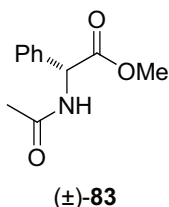

To a solution of amine (±)-45 (15.0 mg, 0.09 mmol) and triethylamine (14.0 μL, 0.1 mmol) in CH<sub>2</sub>Cl<sub>2</sub> (1 mL) at 0 °C was added acetic anhydride (9.44 μL, 0.1 mmol) and the reaction mixture was stirred at rt for 30 minutes. The reaction mixture was washed several times with

water and the organic layer was dried (MgSO<sub>4</sub>), filtered and concentrated *in vacuo* to give acylated amine (±)-**83** as a yellow oil (15.1 mg, 80%); δ<sub>H</sub> (300 MHz, CDCl<sub>3</sub>) 1.97 (3H, s, CH<sub>3</sub>), 3.66 (3H, s, OCH<sub>3</sub>), 5.52 (1H, d, *J* 7.3, C(2)*H*), 6.42 (1H, br s, NH), 7.27-7.29 (5H, m, Ar*H*).

**(R)-methyl 2-acetamido-2-phenylacetate**

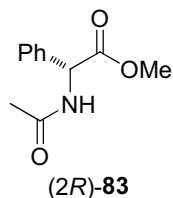

To a solution of amine (2*R*)-**45** (6.0 mg, 0.036 mmol) and triethylamine (5.58 μL, 0.04 mmol) in CH<sub>2</sub>Cl<sub>2</sub> (1 mL) at 0 °C was added acetic anhydride (3.78 μL, 0.04 mmol) and the reaction mixture was stirred at rt for 30 minutes. The reaction mixture was washed several times with water and the organic layer was dried (MgSO<sub>4</sub>), filtered and concentrated *in vacuo* to give acylated amine (±)-**83** as a yellow oil (6.8 mg, 90%); [α]<sub>D</sub><sup>20</sup> -188 (*c* 0.05, CH<sub>2</sub>Cl<sub>2</sub>); {lit.<sup>11</sup> [α]<sub>D</sub><sup>20</sup> -36 (*c* 1.00 in CHCl<sub>3</sub>) for a 24% ee sample (2*R*)-configuration}; Chiral HPLC Chiralcel OJ-H (10% IPA:hexane, flow rate 1 mL min<sup>-1</sup>, 211 nm, 30 °C) t<sub>R</sub>(2*S*): 16.1 min, t<sub>R</sub>(2*R*): 17.9 min, 90% ee.

## 1.4 NMR Analysis

NMR analysis illustrating that hydrazide **4** and its analogues are rotameric

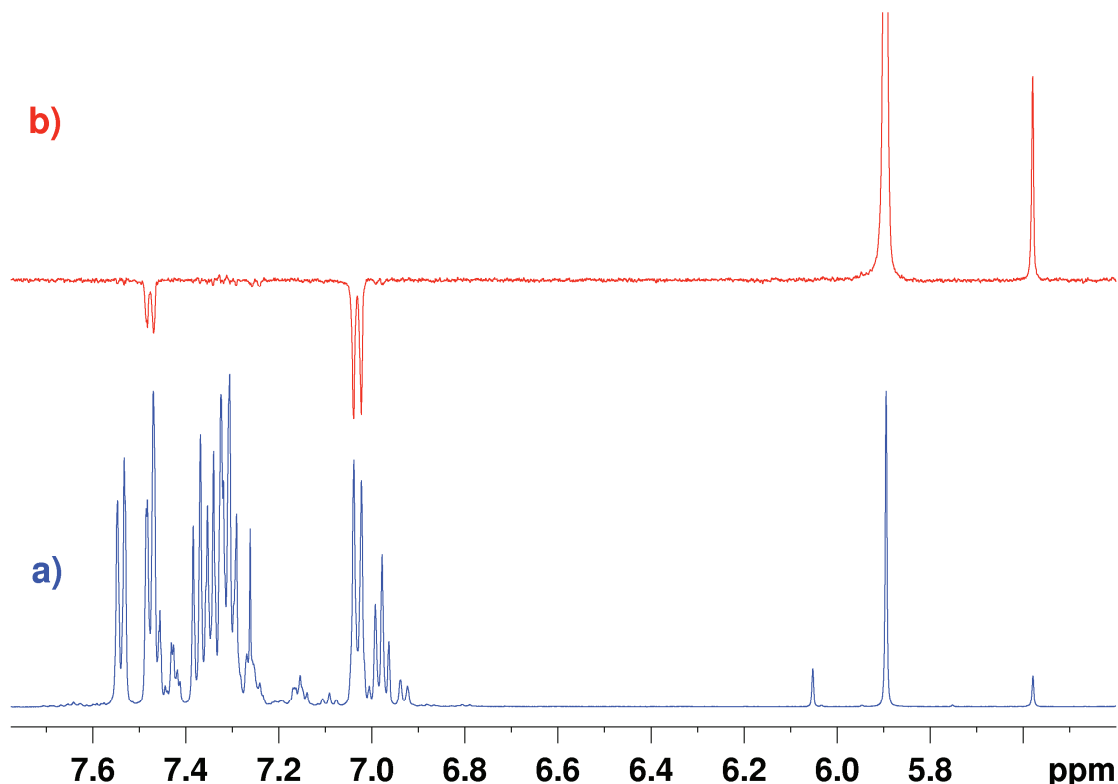

**Fig. 1** a) Expansion of <sup>1</sup>H NMR spectrum of compound **4**. b) 1D gs-NOESY/EXSY spectrum acquired upon selective irradiation of aliphatic CH resonance at 5.89 ppm. The positive phased peak at 5.88 ppm indicates that hydrazide **4** exists in solution in the form of two fast exchanging species, likely rotamers. The negative phased doublets at 7.03 and 7.48 ppm appear in the spectrum due to NOE between the aliphatic CH resonance and adjacent *ortho*-phenyl protons for both major and minor rotamer.

## 1.4 References and Notes

- <sup>1</sup> W. R. Bowman, J. A. Forshaw, K. P. Hall, J. P. Kitchin and A. W. Mott, *Tetrahedron*, 1996, **52**, 3961.
- <sup>2</sup> B. Laude, M. Souflaoui and J. Arriau, *J. Heterocycl. Chem.*, 1977, **14**, 1183.
- <sup>3</sup> Z. V. Molodykh, B. I. Buzykin, M. A. Kudrina, L. P. Sysoeva, N. G. Gazetdinova, I. D. Neklesova and Y. P. Kitaev, *Pharm. Chem. J.*, 1980, **14**, 162.
- <sup>4</sup> Y-S. Niu and J-P. Li, *J. Chem. Res., Synop.*, 2005, **9**, 551.
- <sup>5</sup> K. Issleib and O. Low, *Z. Anorg. Allg. Chem.*, 1966, **346**, 241.
- <sup>6</sup> K. Hisler, A. G. J. Aurelien, S-Z. Zhuo and J. A. Murphy., *Tetrahedron Letters*, 2009, **50**, 3290.
- <sup>7</sup> S. Karady, M. G. Ly, S. H. Pines, J. Chemerda and M. Sletzing, *Synthesis*, 1973, 50.
- <sup>8</sup> N. Kise and S. Morimoto, *Tetrahedron*, 2008, **64**, 1765.

- <sup>9</sup> C. Zhu and T. Akiyama, *Adv. Synth. Catal.*, 2010, 352, 1846.
- <sup>10</sup> G. Shang, Q. Yang and X. Zhang, *Angew. Chem.*, 2006, **118**, 6508.
- <sup>11</sup> A. R. Katritzky, D. Fedoseyenko, M. S. Kim and P. J. Steel, *Tetrahedron: Asymmetry*, 2010, **21**, 51.
- <sup>12</sup> H. E. Bartrum, C. J. Moody, C. J. Hayes and D. C. Blakemore, *Chem. Eur. J.*, 2011, 17, 9586.



## HPLC Data

HPLC data compound **3**: Chiralpak AD-H 5% IPA:hexane, 1 mL min<sup>-1</sup>, 211 nm, 20 °C, >99% ee

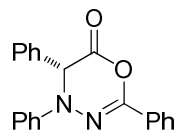

|   | inj. Number | Peak Name | R. Time | Area        | Area % |
|---|-------------|-----------|---------|-------------|--------|
| 1 | 1.00        | *1        | 8.97    | 38149680.00 | 49.37  |
| 2 | 1.00        | *2        | 14.91   | 38692360.00 | 50.63  |

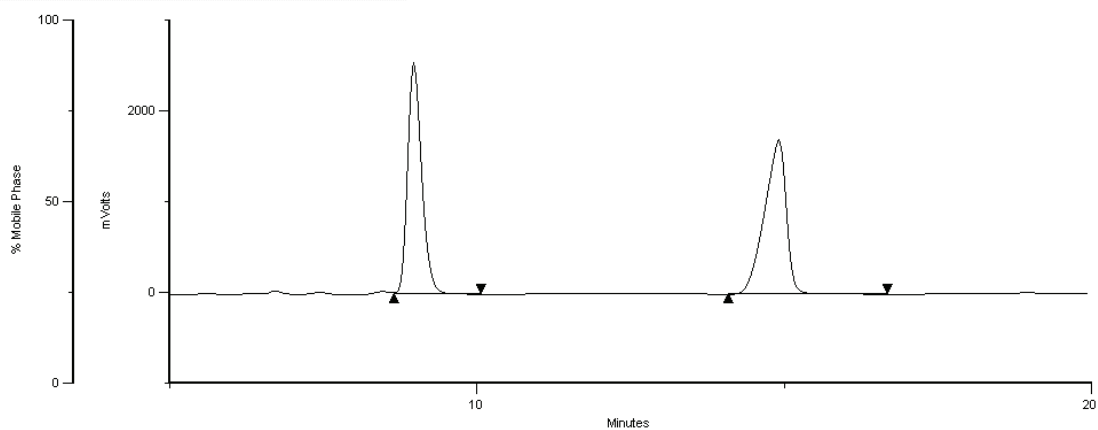

|   | inj. Number | Peak Name | R. Time | Area        | Area % |
|---|-------------|-----------|---------|-------------|--------|
| 1 | 1.00        | *1        | 8.84    | 119161.32   | 0.17   |
| 2 | 1.00        | *2        | 14.75   | 38126640.00 | 99.83  |

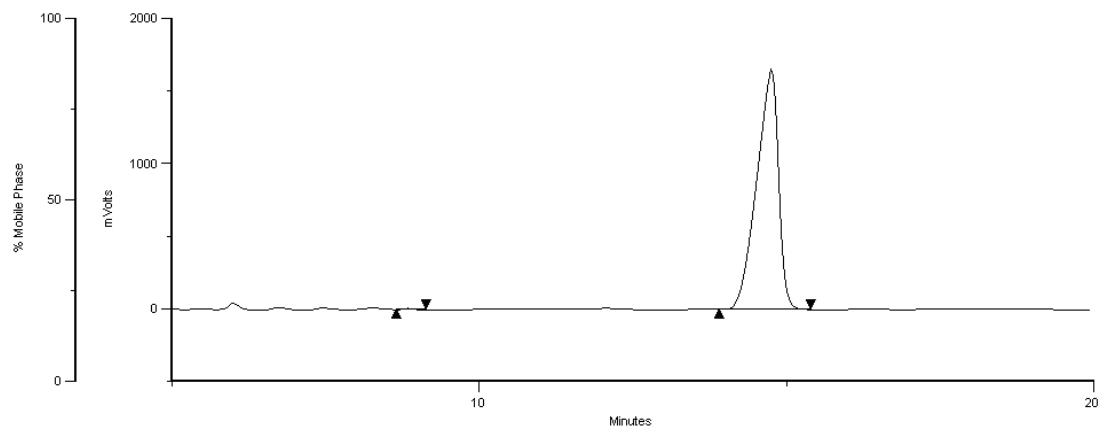

HPLC data compound 4: Chiralpak IB 10% IPA:hexane, 1 mL min<sup>-1</sup>, 211 nm, 20 °C, 99% ee

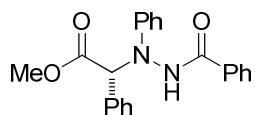

|   | Inj. Number | Peak Name | R. Time | Area        | Area % |
|---|-------------|-----------|---------|-------------|--------|
| 1 | 1.00        | *1        | 12.72   | 54284232.00 | 49.17  |
| 2 | 1.00        | 2         | 15.01   | 56125892.00 | 50.83  |

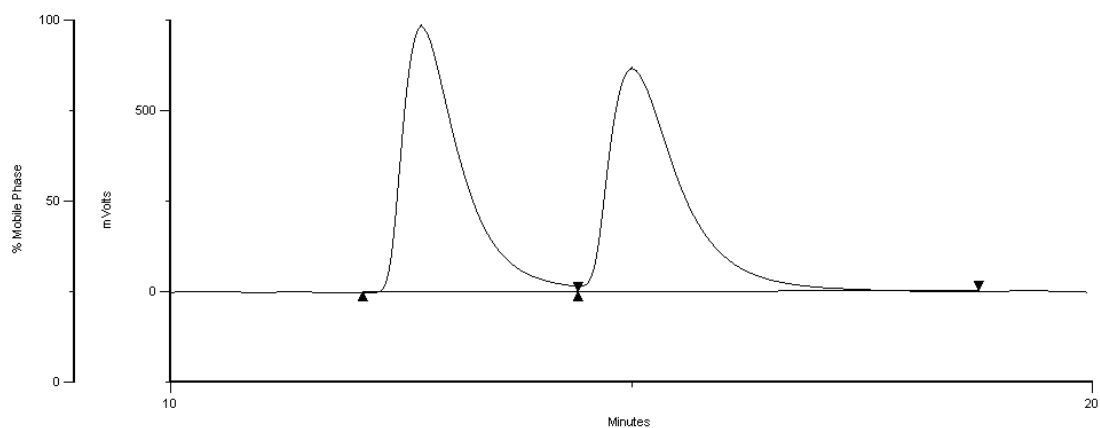

|   | Inj. Number | Peak Name | R. Time | Area        | Area % |
|---|-------------|-----------|---------|-------------|--------|
| 1 | 1.00        | *1        | 13.16   | 321664.56   | 0.54   |
| 2 | 1.00        | *2        | 15.16   | 59142188.00 | 99.46  |

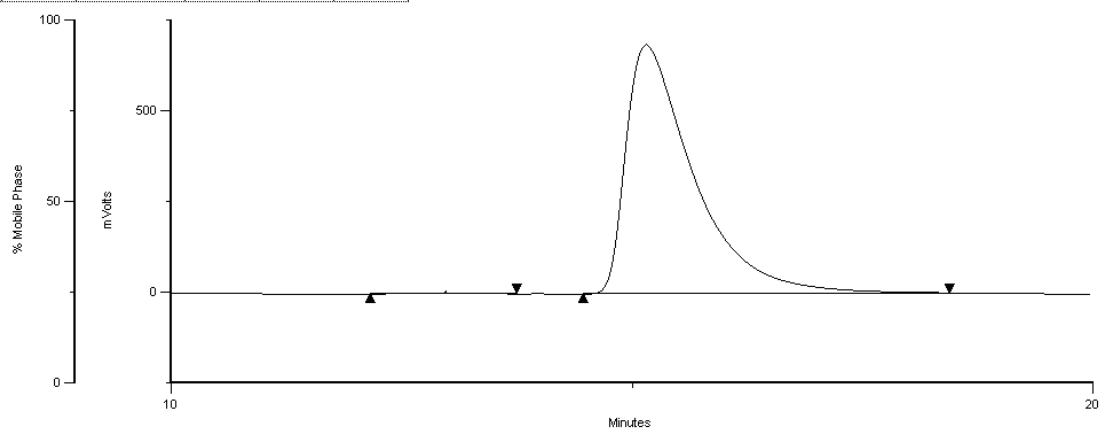

HPLC data compound **6**: Chiralpak AD-H 5% IPA:hexane, 1 mL min<sup>-1</sup>, 211 nm, 20 °C, >99% ee

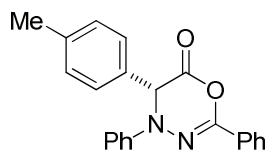

| Inj. Number | Peak Name | R. Time | Area        | Area % |
|-------------|-----------|---------|-------------|--------|
| 1           | *1        | 8.67    | 31800880.00 | 50.19  |
| 2           | *2        | 20.24   | 31415304.00 | 49.81  |

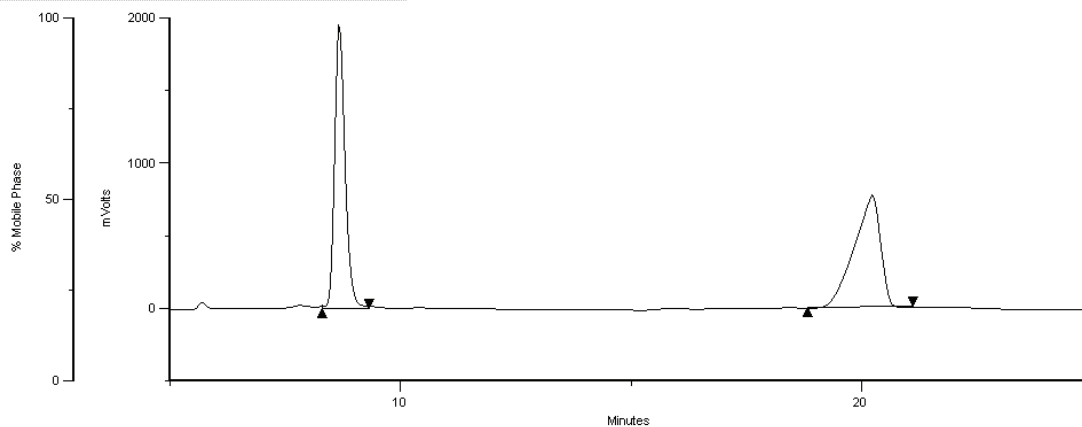

| Inj. Number | Peak Name | R. Time | Area        | Area % |
|-------------|-----------|---------|-------------|--------|
| 1           | *1        | 8.67    | 94316.68    | 0.09   |
| 2           | *2        | 20.76   | 10163560.00 | 99.91  |

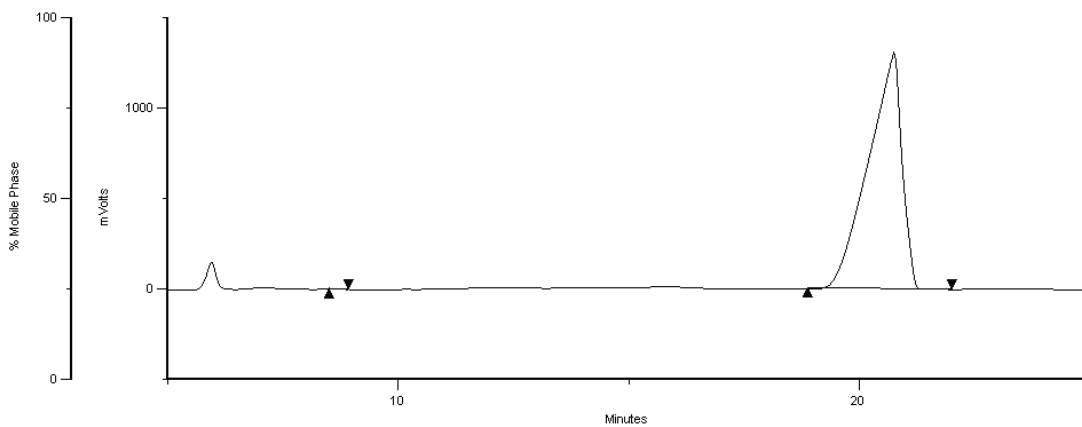

HPLC data compound **7**: Chiralpak AD-H 5% IPA:hexane, 1 mL min<sup>-1</sup>, 211 nm, 20 °C, 99% ee

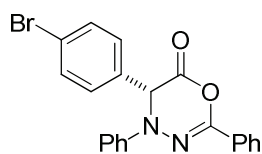

|   | Inj. Number | Peak Name | R. Time | Area        | Area % |
|---|-------------|-----------|---------|-------------|--------|
| 1 | 1.00        | *1        | 10.12   | 30899266.00 | 50.66  |
| 2 | 1.00        | *2        | 18.98   | 30091176.00 | 49.34  |

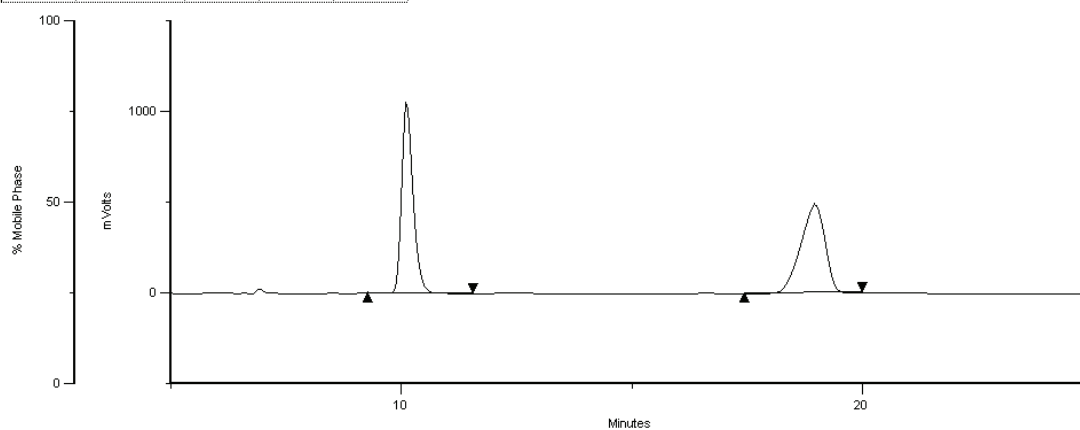

|   | Inj. Number | Peak Name | R. Time | Area        | Area % |
|---|-------------|-----------|---------|-------------|--------|
| 1 | 1.00        | *1        | 10.15   | 238250.17   | 0.30   |
| 2 | 1.00        | *2        | 19.47   | 30005520.00 | 99.70  |

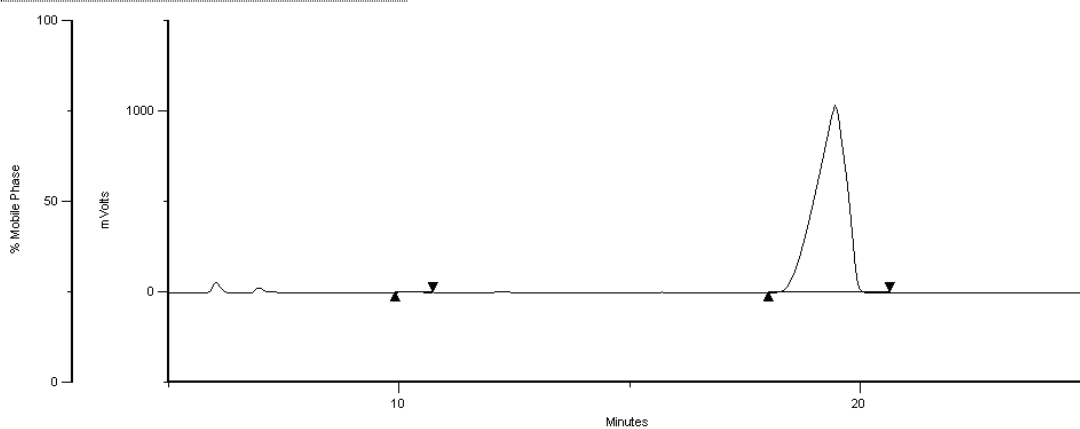

HPLC data compound **8**: Chiralpak AD-H 5% IPA:hexane, 1 mL min<sup>-1</sup>, 211 nm, 20 °C, >99% ee

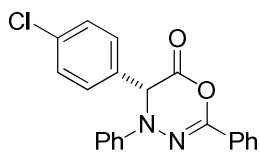

|   | inj. Number | Peak Name | R. Time | Area        | Area % |
|---|-------------|-----------|---------|-------------|--------|
| 1 | 1.00        | *1        | 9.15    | 12294556.00 | 50.86  |
| 2 | 1.00        | *2        | 16.89   | 10859416.00 | 49.14  |

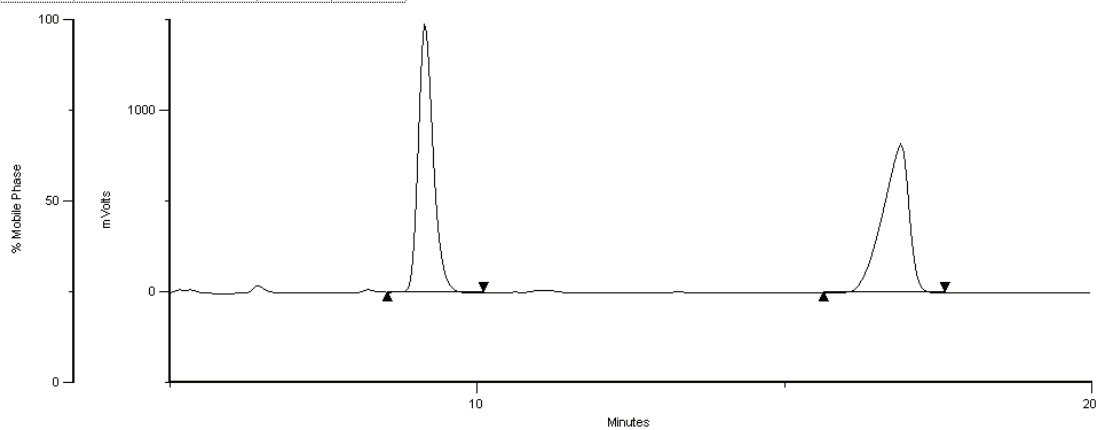

|   | inj. Number | Peak Name | R. Time | Area        | Area % |
|---|-------------|-----------|---------|-------------|--------|
| 1 | 1.00        | *1        | 9.13    | 214503.36   | 0.17   |
| 2 | 1.00        | *2        | 17.34   | 23265856.00 | 99.83  |

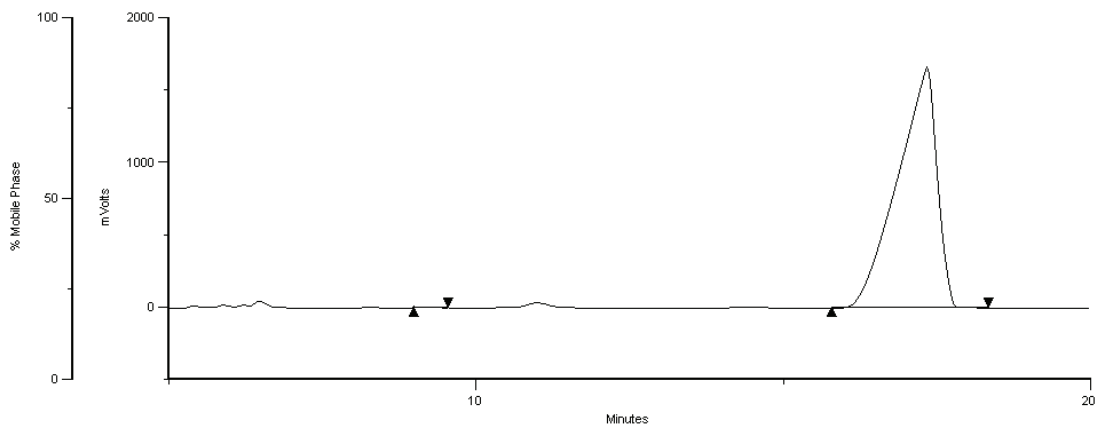

HPLC data compound **9**: Chiralpak AD-H 5% IPA:hexane, 2 mL min<sup>-1</sup>, 211 nm, 20 °C, >99% ee

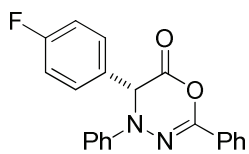

| Inj. Number | Peak Name | R. Time | Area        | Area % |
|-------------|-----------|---------|-------------|--------|
| 1           | *1        | 8.51    | 35436920.00 | 50.62  |
| 2           | *2        | 12.72   | 34567096.00 | 49.38  |

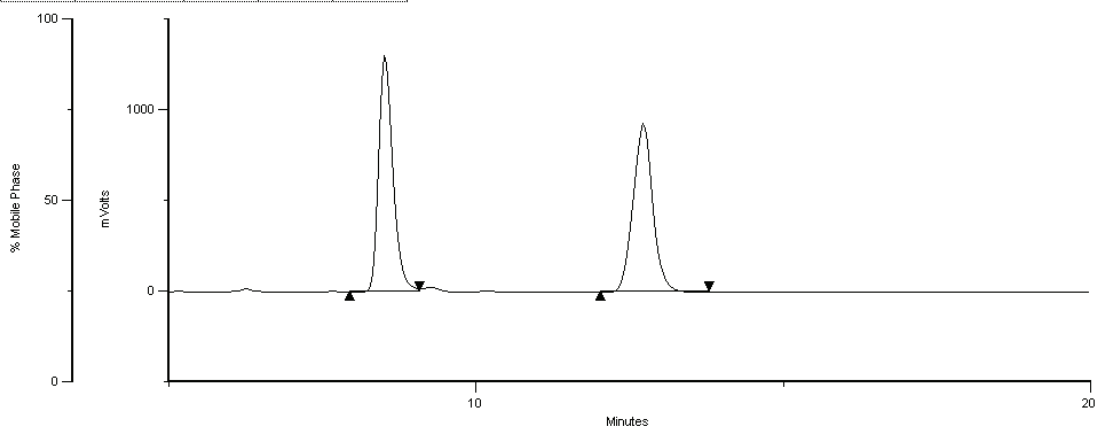

| Inj. Number | Peak Name | R. Time | Area        | Area % |
|-------------|-----------|---------|-------------|--------|
| 1           | *1        | 8.56    | 86740.42    | 0.14   |
| 2           | *2        | 12.94   | 30603816.00 | 99.86  |

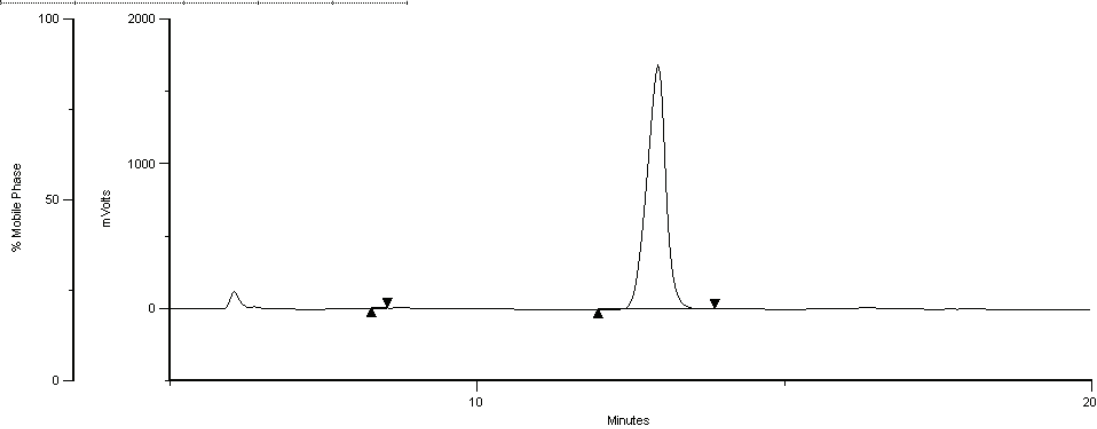

HPLC data compound **10**: Chiralpak AD-H 5% IPA:hexane, 2 mL min<sup>-1</sup>, 211 nm, 20 °C, 98% ee

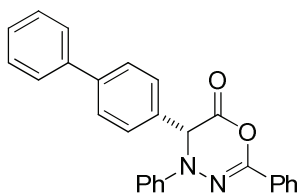

| Inj. Number | Peak Name | R. Time | Area        | Area % |
|-------------|-----------|---------|-------------|--------|
| 1           | *1        | 13.50   | 12698000.00 | 49.74  |
| 2           | 2         | 16.68   | 13136540.00 | 50.26  |

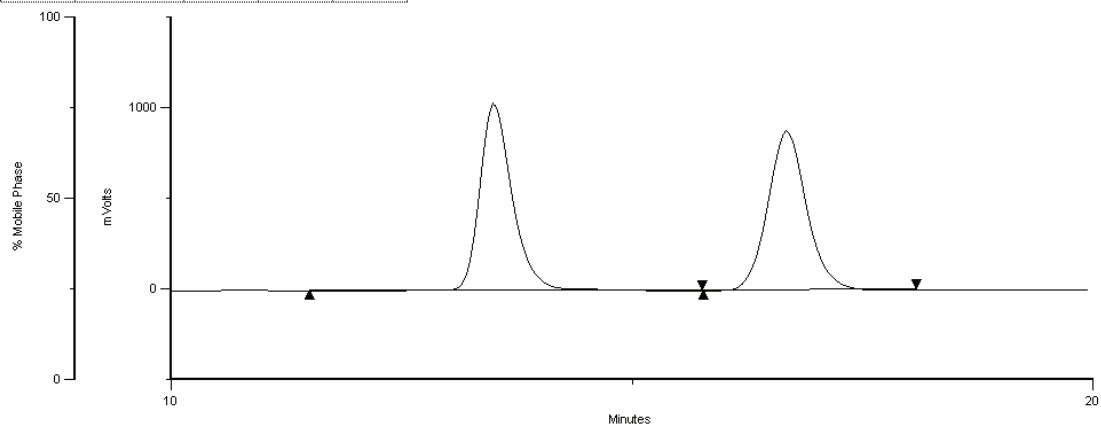

| Inj. Number | Peak Name | R. Time | Area        | Area % |
|-------------|-----------|---------|-------------|--------|
| 1           | *1        | 13.45   | 1328711.88  | 1.07   |
| 2           | *2        | 16.69   | 22346144.00 | 98.93  |

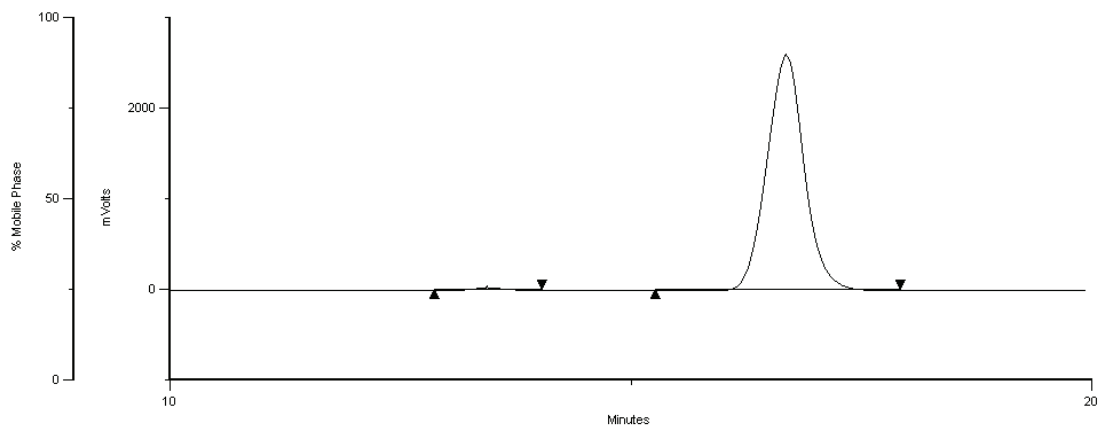

HPLC data compound **11**: Chiralpak AD-H 5% IPA:hexane, 1 mL min<sup>-1</sup>, 211 nm, 20 °C, >99% ee

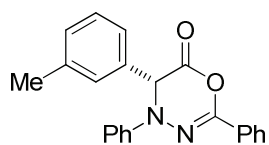

|   | inj. Number | Peak Name | R. Time | Area        | Area % |
|---|-------------|-----------|---------|-------------|--------|
| 1 | 1.00        | *1        | 7.65    | 38555336.00 | 49.70  |
| 2 | 1.00        | *2        | 8.88    | 39260780.00 | 50.30  |

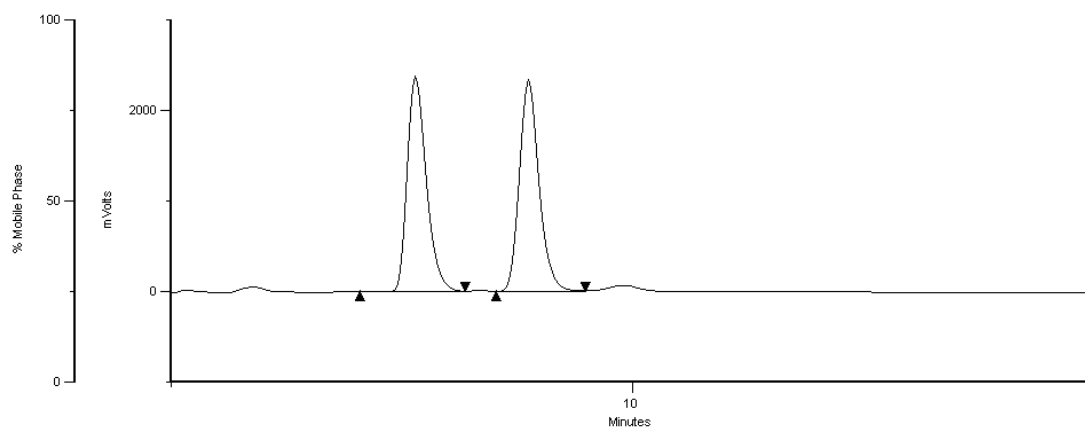

|   | inj. Number | Peak Name | R. Time | Area        | Area % |
|---|-------------|-----------|---------|-------------|--------|
| 1 | 1.00        | *1        | 7.87    | 123616.59   | 0.15   |
| 2 | 1.00        | *2        | 8.76    | 79818408.00 | 99.85  |

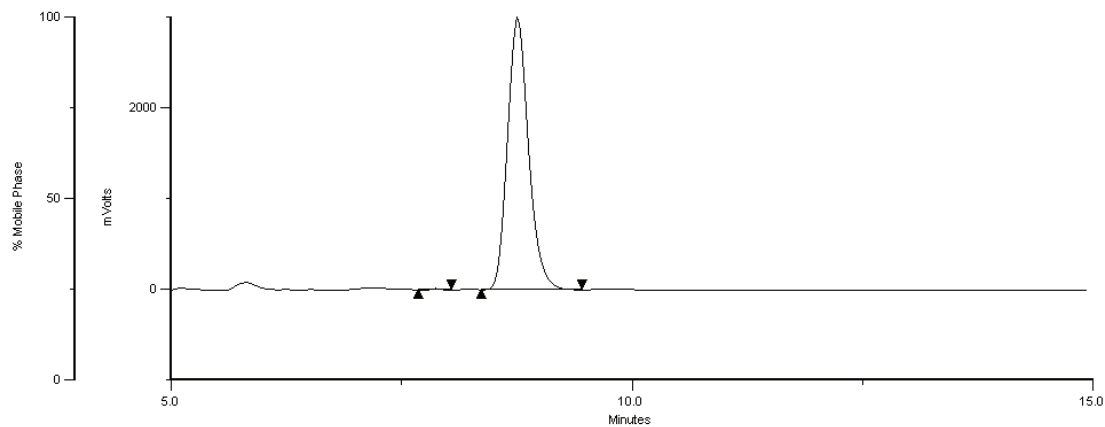



HPLC data compound **12**: Chiralpak AD-H 5% IPA:hexane, 1 mL min<sup>-1</sup>, 211 nm, 20 °C, 99% ee

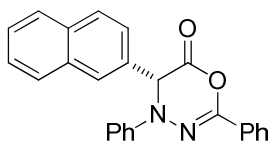

|   | Inj. Number | Peak Name | R. Time | Area        | Area % |
|---|-------------|-----------|---------|-------------|--------|
| 1 | 1.00        | *1        | 13.00   | 51101828.00 | 48.97  |
| 2 | 1.00        | *2        | 22.45   | 53241888.00 | 51.03  |

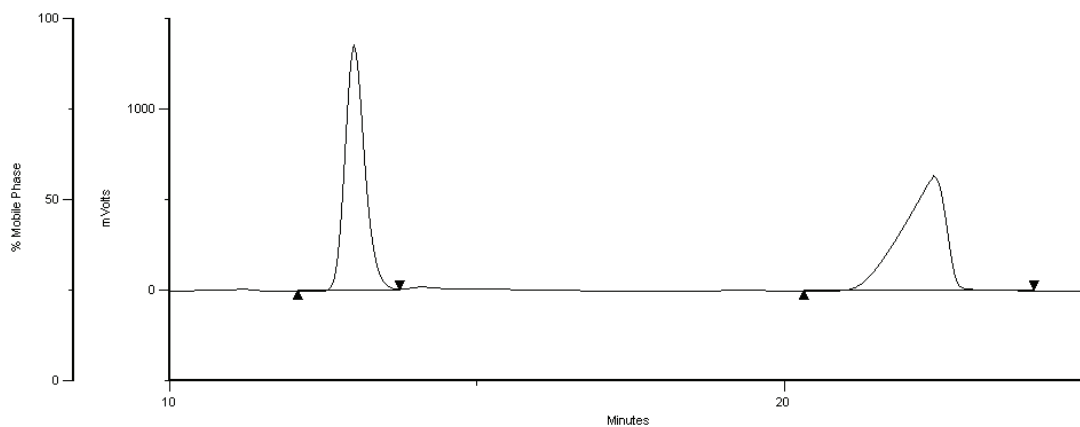

|   | Inj. Number | Peak Name | R. Time | Area        | Area % |
|---|-------------|-----------|---------|-------------|--------|
| 1 | 1.00        | *1        | 13.12   | 417392.94   | 0.37   |
| 2 | 1.00        | *2        | 23.23   | 11715296.00 | 99.63  |

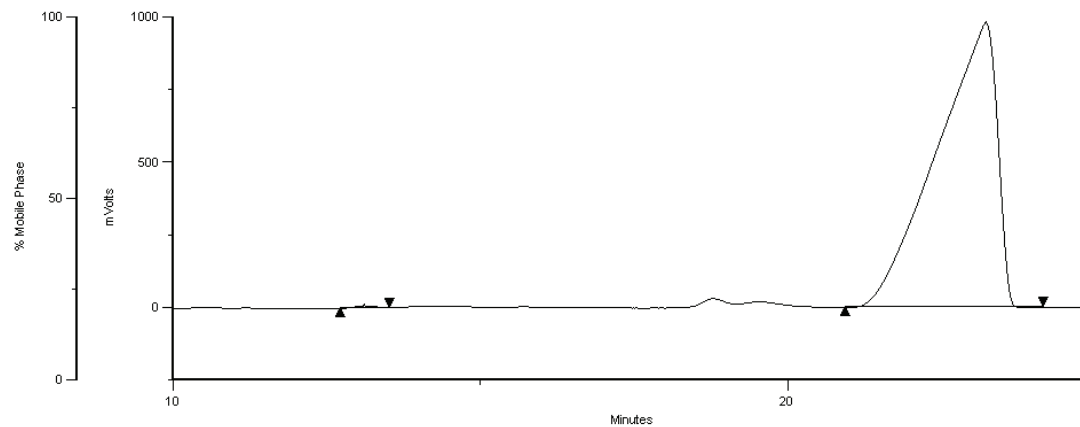

HPLC data compound **13**: Chiralpak AD-H 5% IPA:hexane, 2 mL min<sup>-1</sup>, 211 nm, 20 °C, >99% ee

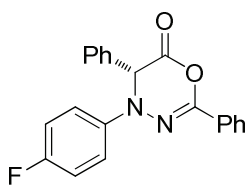

| Inj. Number | Peak Name | R. Time | Area        | Area % |
|-------------|-----------|---------|-------------|--------|
| 1           | *1        | 11.88   | 31871968.00 | 49.78  |
| 2           | *2        | 16.53   | 32423600.00 | 50.22  |

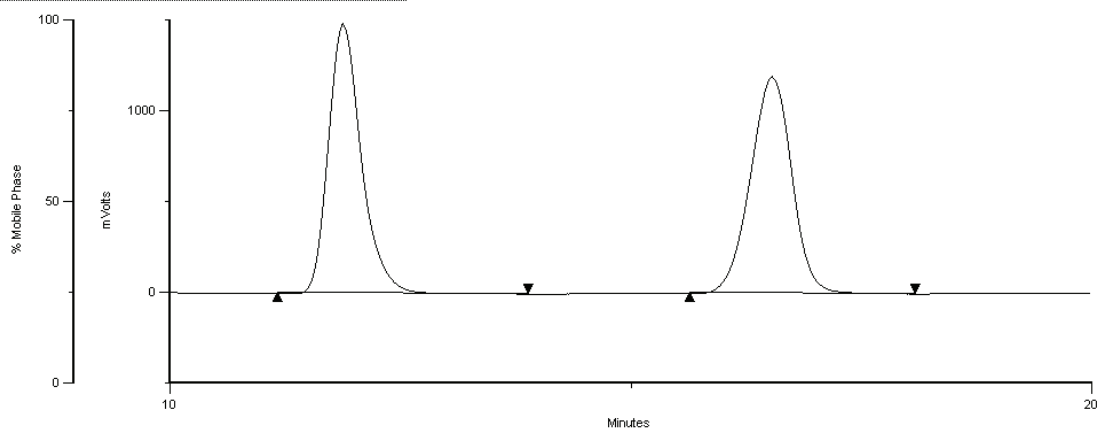

| Inj. Number | Peak Name | R. Time | Area        | Area % |
|-------------|-----------|---------|-------------|--------|
| 1           | *1        | 11.89   | 227088.08   | 0.19   |
| 2           | *2        | 16.47   | 18728992.00 | 99.81  |

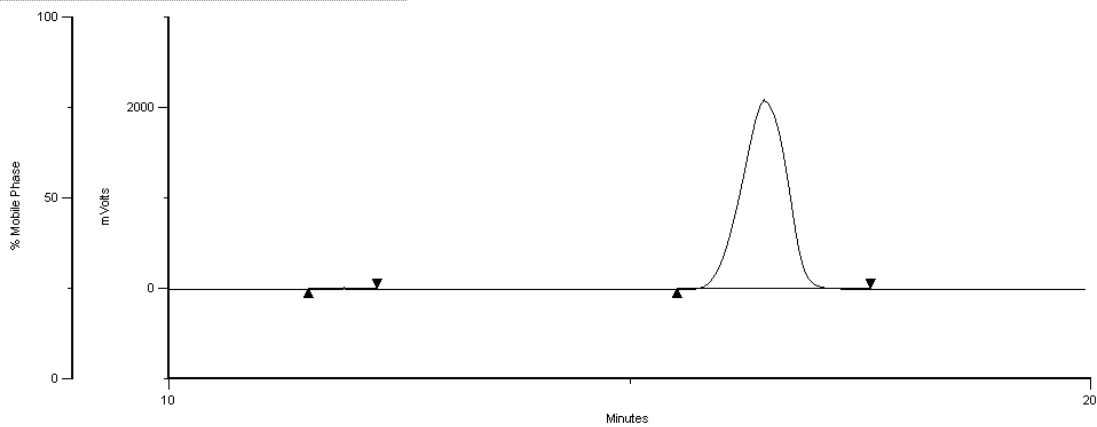

HPLC data compound **14**: Chiralpak AD-H 5% IPA:hexane, 1 mL min<sup>-1</sup>, 211 nm, 20 °C, 99% ee

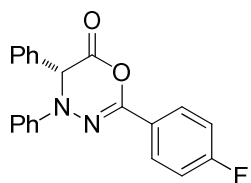

|   | Inj. Number | Peak Name | R. Time | Area        | Area % |
|---|-------------|-----------|---------|-------------|--------|
| 1 | 1.00        | *1        | 9.85    | 12655704.00 | 49.94  |
| 2 | 1.00        | *2        | 18.61   | 12754988.00 | 50.06  |

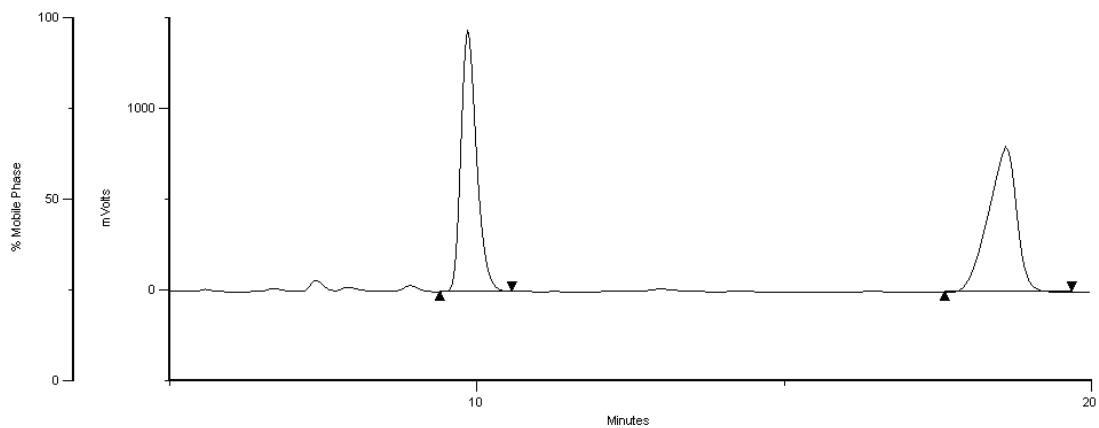

|   | Inj. Number | Peak Name | R. Time | Area        | Area % |
|---|-------------|-----------|---------|-------------|--------|
| 1 | 1.00        | *1        | 9.91    | 209480.56   | 0.40   |
| 2 | 1.00        | *2        | 18.86   | 52050228.00 | 99.60  |

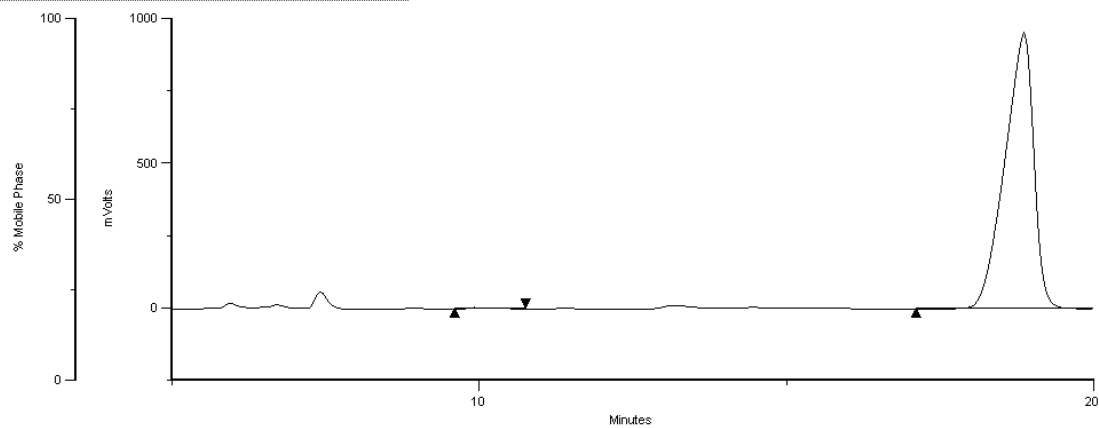

HPLC data compound **15**: Chiralpak AD-H 5% IPA:hexane, 1 mL min<sup>-1</sup>, 211 nm, 20 °C, 99% ee

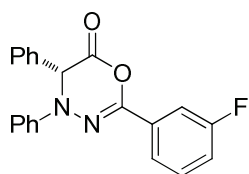

|   | inj. Number | Peak Name | R. Time | Area        | Area % |
|---|-------------|-----------|---------|-------------|--------|
| 1 | 1.00        | *1        | 8.07    | 23199312.00 | 49.96  |
| 2 | 1.00        | *2        | 10.46   | 23372184.00 | 50.04  |

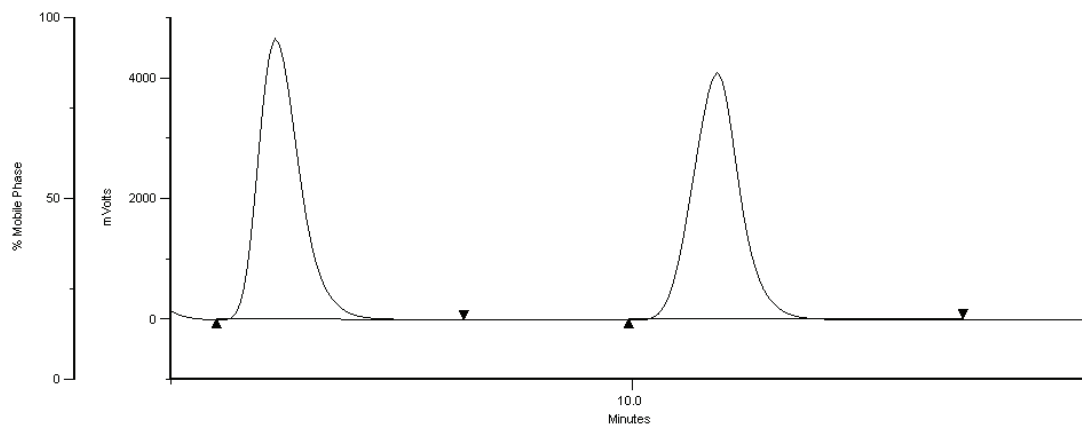

|   | inj. Number | Peak Name | R. Time | Area        | Area % |
|---|-------------|-----------|---------|-------------|--------|
| 1 | 1.00        | *1        | 8.34    | 762609.56   | 0.60   |
| 2 | 1.00        | *2        | 10.54   | 25357336.00 | 99.40  |

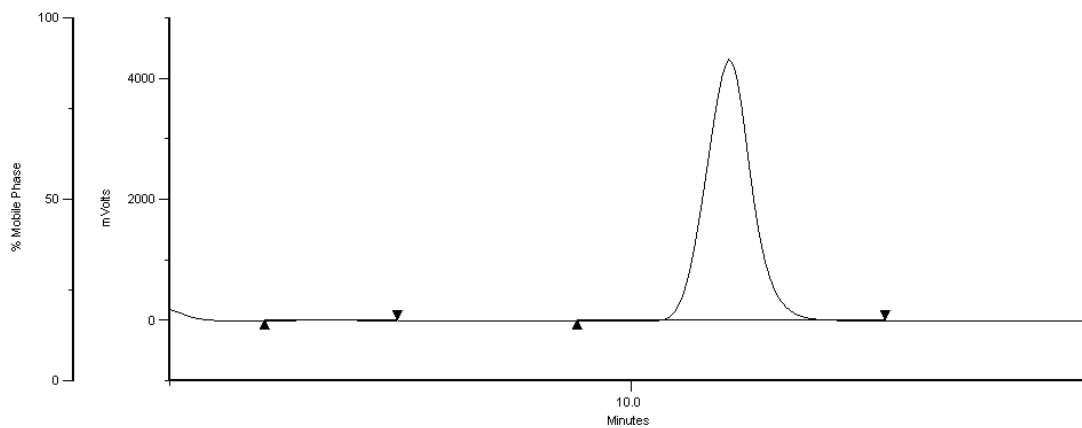

HPLC data compound **16**: Chiralpak AD-H 5% IPA:hexane, 1 mL min<sup>-1</sup>, 211 nm, 20 °C, 99% ee

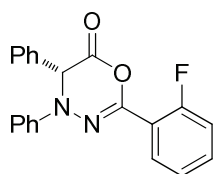

|   | Inj. Number | Peak Name | R. Time | Area        | Area % |
|---|-------------|-----------|---------|-------------|--------|
| 1 | 1.00        | *1        | 10.35   | 52643232.00 | 50.68  |
| 2 | 1.00        | *2        | 12.99   | 51229808.00 | 49.32  |

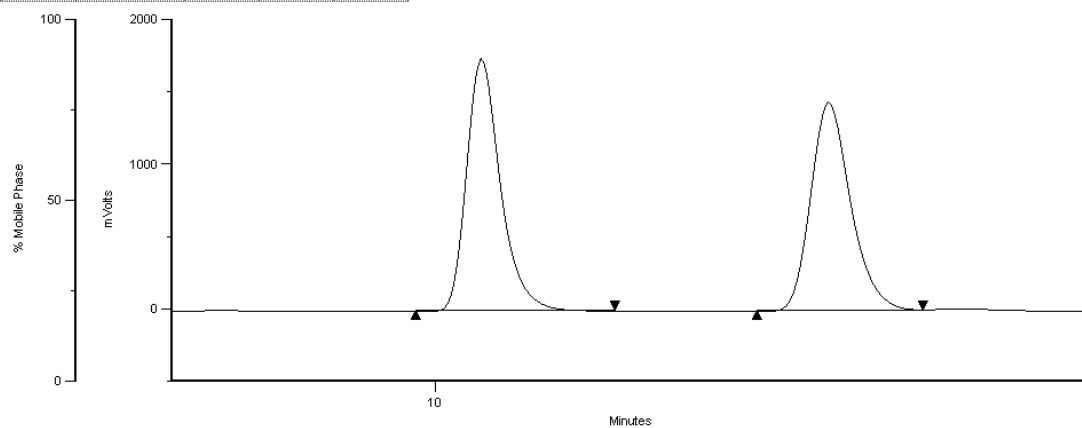

|   | Inj. Number | Peak Name | R. Time | Area        | Area % |
|---|-------------|-----------|---------|-------------|--------|
| 1 | 1.00        | *1        | 10.30   | 607907.19   | 0.55   |
| 2 | 1.00        | *2        | 13.01   | 99373896.00 | 99.45  |

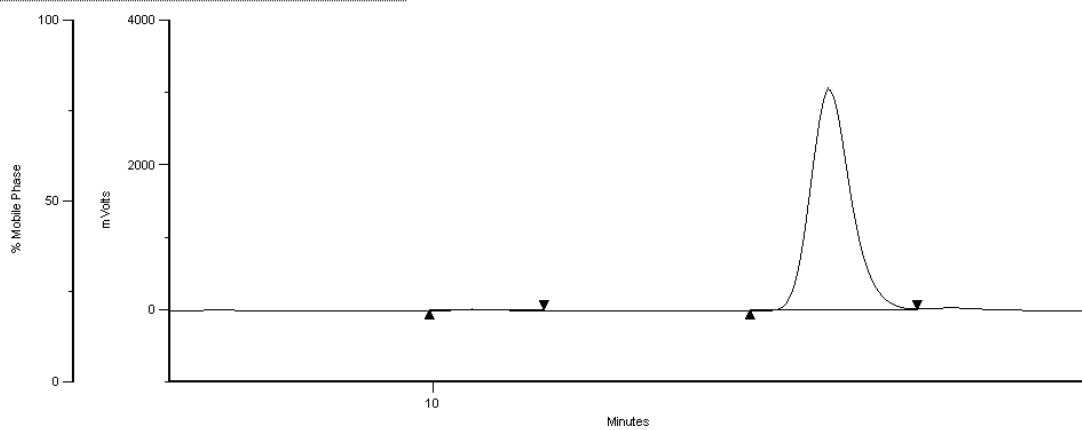

HPLC data compound **17**: Chiralpak AD-H 5% IPA:hexane, 1 mL min<sup>-1</sup>, 211 nm, 20 °C, >99% ee

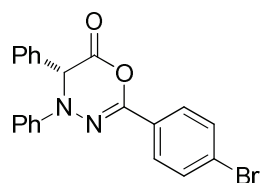

| Inj. Number | Peak Name | R. Time | Area        | Area % |
|-------------|-----------|---------|-------------|--------|
| 1           | *1        | 12.76   | 33235372.00 | 50.03  |
| 2           | *2        | 24.14   | 33163196.00 | 49.97  |

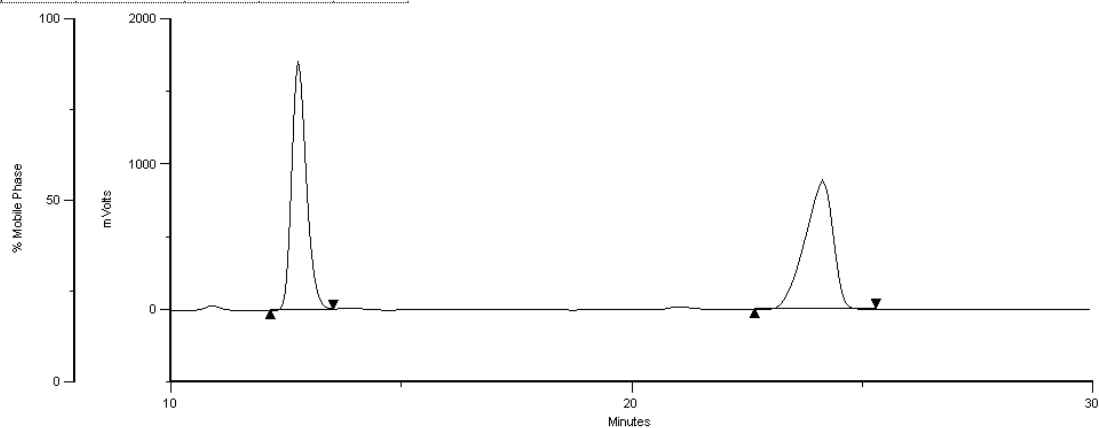

| Inj. Number | Peak Name | R. Time | Area        | Area % |
|-------------|-----------|---------|-------------|--------|
| 1           | *1        | 12.72   | 298010.69   | 0.19   |
| 2           | *2        | 24.48   | 60513664.00 | 99.81  |

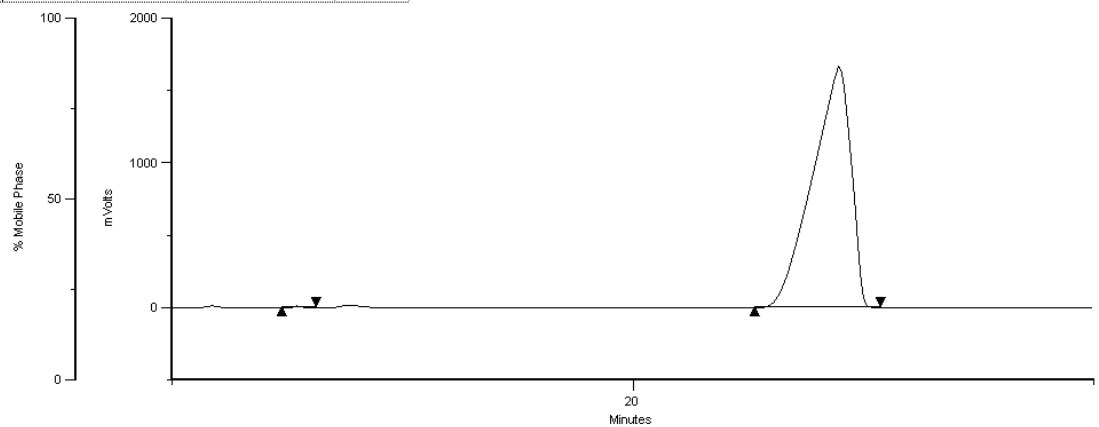

HPLC data compound **18**: Chiralpak AD-H 5% IPA:hexane, 2 mL min<sup>-1</sup>, 211 nm, 20 °C, >99% ee

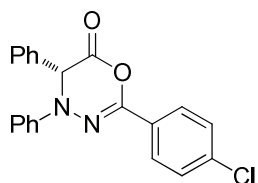

| Inj. Number | Peak Name | R. Time | Area        | Area % |
|-------------|-----------|---------|-------------|--------|
| 1           | *1        | 11.48   | 33839756.00 | 49.70  |
| 2           | *2        | 22.79   | 34500632.00 | 50.31  |

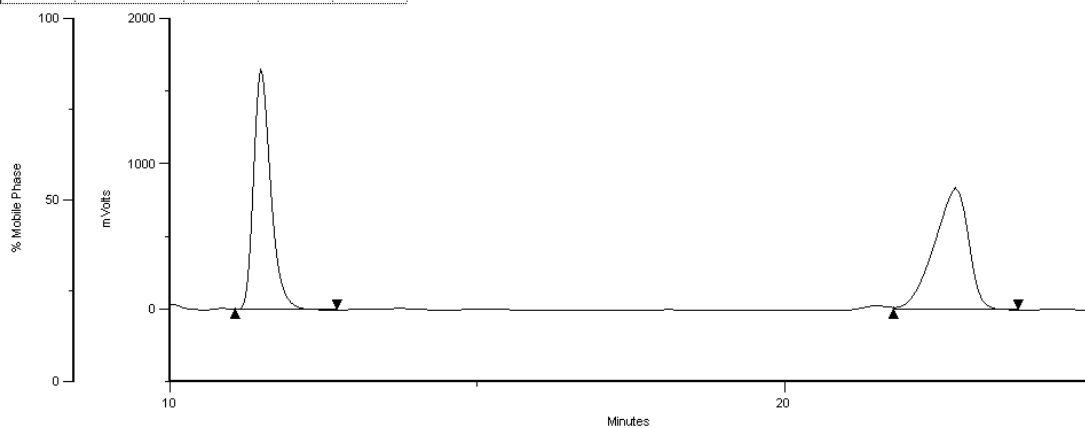

| Inj. Number | Peak Name | R. Time | Area        | Area % |
|-------------|-----------|---------|-------------|--------|
| 1           | *1        | 11.47   | 193277.06   | 0.15   |
| 2           | *2        | 23.02   | 25874208.00 | 99.85  |

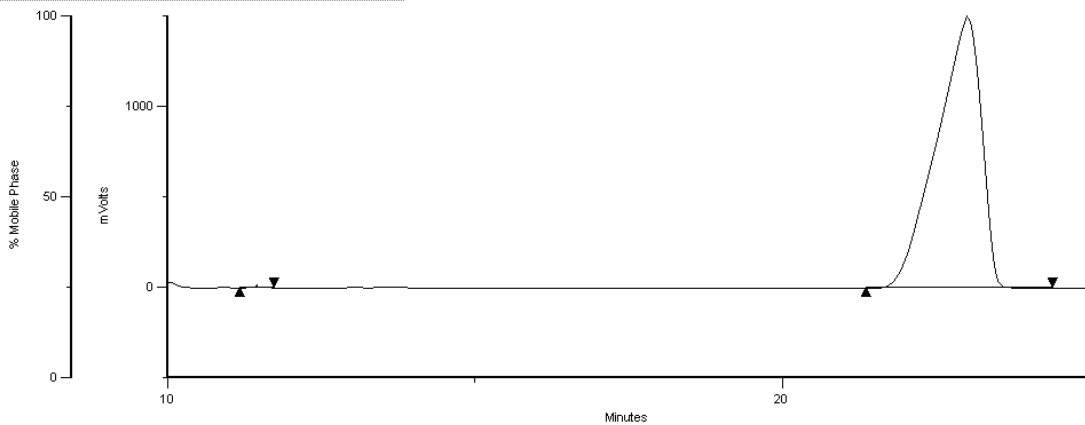

HPLC data compound **19**: Chiralpak AD-H 2% IPA:hexane, 1 mL min<sup>-1</sup>, 211 nm, 20 °C, >99% ee

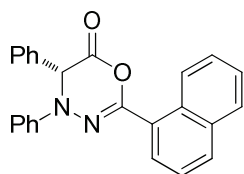

|   | inj. Number | Peak Name | R. Time | Area        | Area % |
|---|-------------|-----------|---------|-------------|--------|
| 1 | 1.00        | *1        | 15.71   | 25713628.00 | 49.90  |
| 2 | 1.00        | 2         | 16.88   | 25819118.00 | 50.10  |

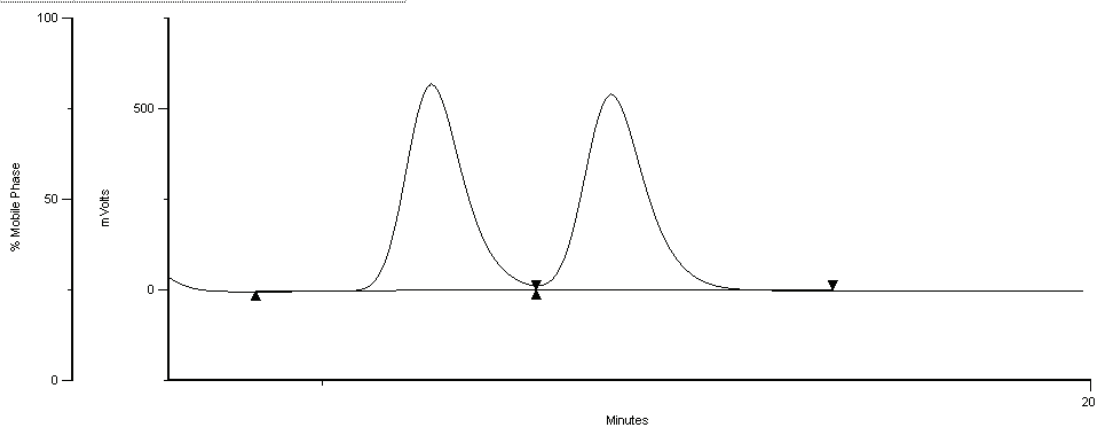

|   | inj. Number | Peak Name | R. Time | Area        | Area % |
|---|-------------|-----------|---------|-------------|--------|
| 1 | 1.00        | *1        | 15.77   | 96360.26    | 0.07   |
| 2 | 1.00        | *2        | 16.96   | 38902784.00 | 99.93  |

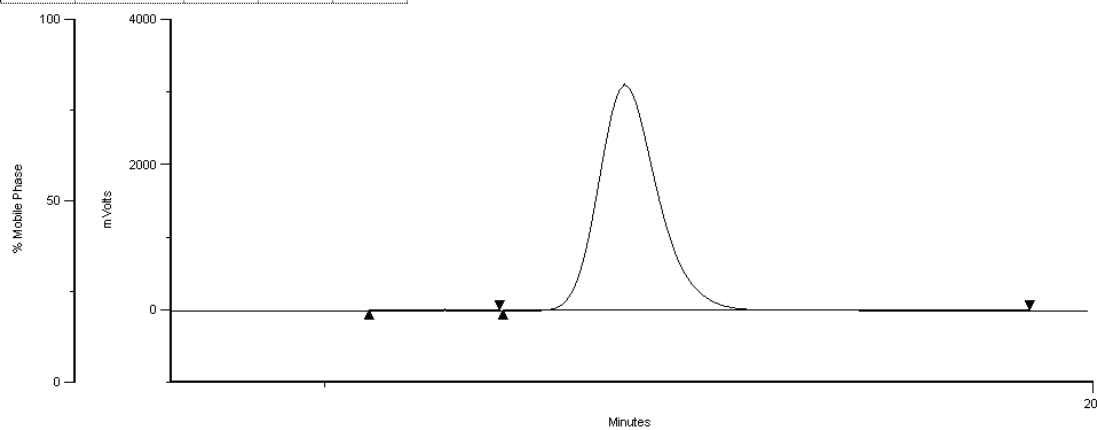



HPLC data compound **20**: Chiralpak IB 10% IPA:hexane, 1 mL min<sup>-1</sup>, 211 nm, 20 °C, 98% ee

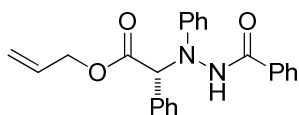

|   | inj. Number | Peak Name | R. Time | Area        | Area % |
|---|-------------|-----------|---------|-------------|--------|
| 1 | 1.00        | *1        | 18.07   | 85810256.00 | 48.21  |
| 2 | 1.00        | 2         | 21.78   | 99611376.00 | 51.79  |

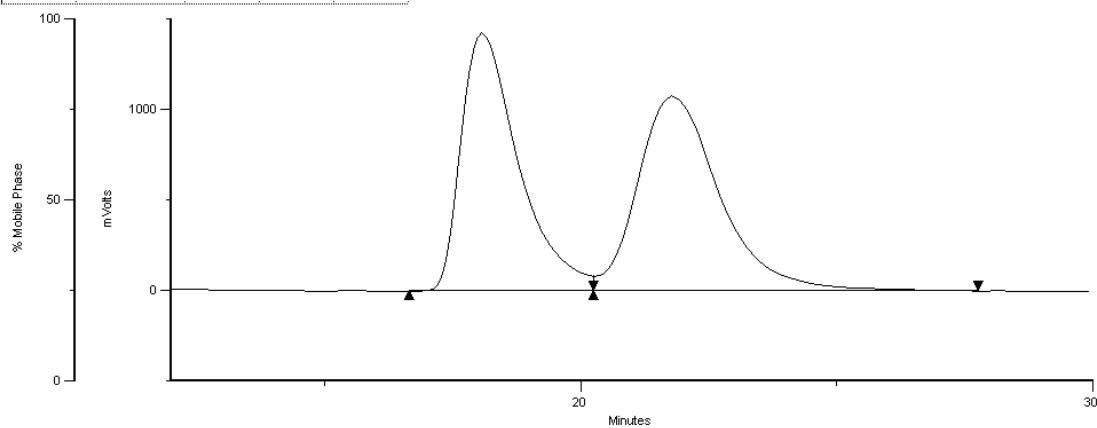

|   | inj. Number | Peak Name | R. Time | Area        | Area % |
|---|-------------|-----------|---------|-------------|--------|
| 1 | 1.00        | *1        | 18.34   | 33232328.00 | 99.12  |
| 2 | 1.00        | *2        | 22.94   | 823436.62   | 0.88   |

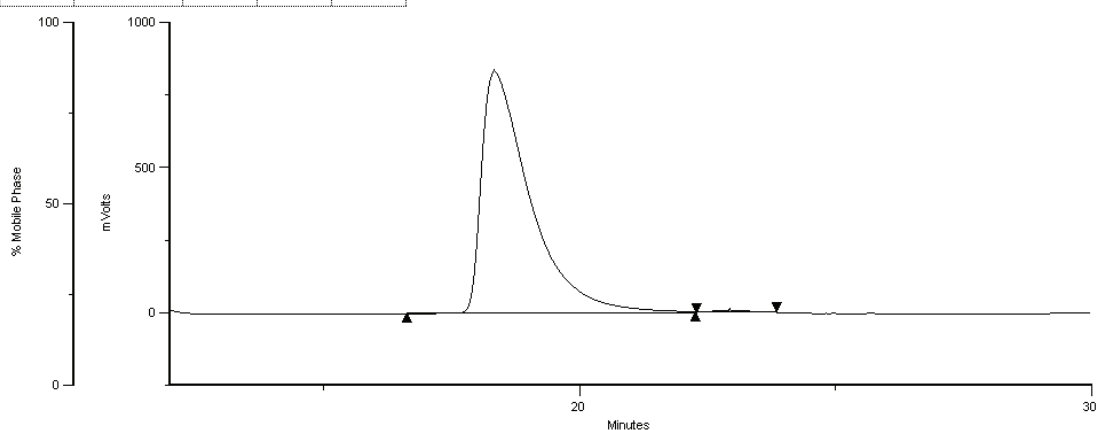

HPLC data compound **21**: Chiralpak IB 20% IPA:hexane, 1 mL min<sup>-1</sup>, 211 nm, 20 °C, 99% ee

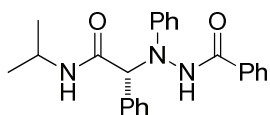

|   | Inj. Number | Peak Name | R. Time | Area        | Area % |
|---|-------------|-----------|---------|-------------|--------|
| 1 | 1.00        | *1        | 6.58    | 73329576.00 | 48.69  |
| 2 | 1.00        | *2        | 7.61    | 77290104.00 | 51.31  |

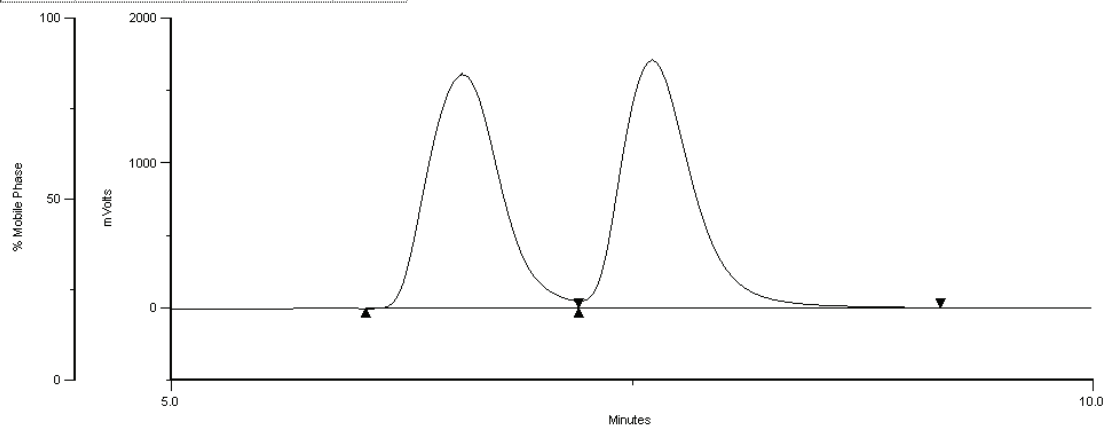

|   | Inj. Number | Peak Name | R. Time | Area        | Area % |
|---|-------------|-----------|---------|-------------|--------|
| 1 | 1.00        | *1        | 6.99    | 401518.41   | 0.34   |
| 2 | 1.00        | 2         | 7.65    | 16458616.00 | 99.66  |

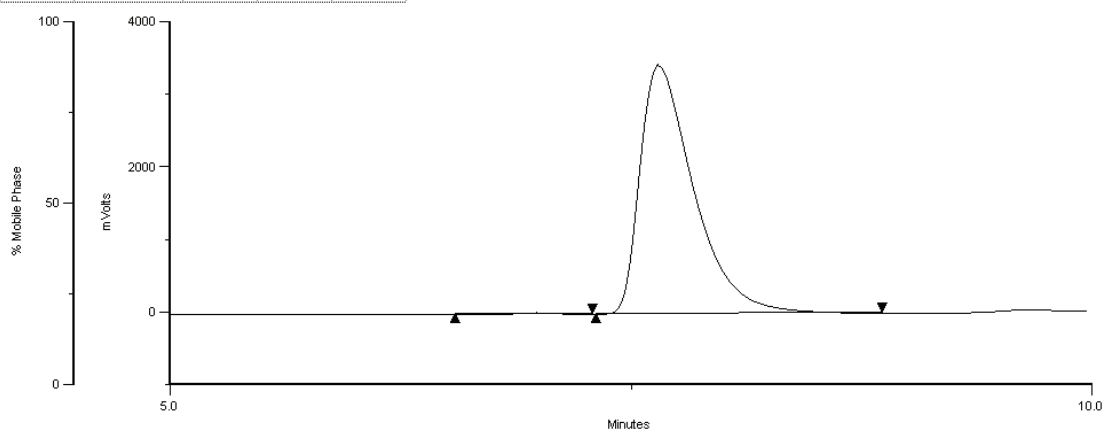

HPLC data compound **22**: Chiralpak IB 40% IPA:hexane, 1 mL min<sup>-1</sup>, 211 nm, 20 °C, 99% ee

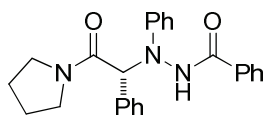

|   | Inj. Number | Peak Name | R. Time | Area        | Area % |
|---|-------------|-----------|---------|-------------|--------|
| 1 | 1.00        | *1        | 6.29    | 41210352.00 | 50.68  |
| 2 | 1.00        | 2         | 11.09   | 37403904.00 | 49.32  |

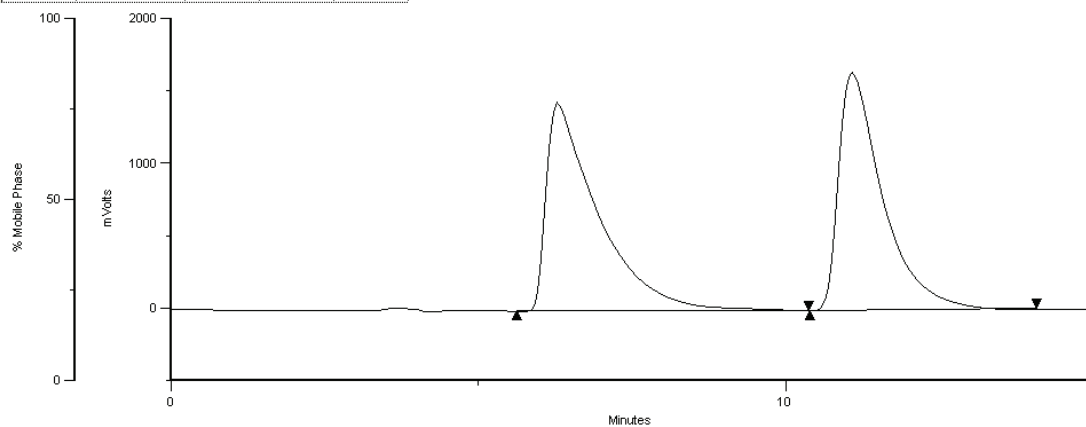

|   | Inj. Number | Peak Name | R. Time | Area        | Area % |
|---|-------------|-----------|---------|-------------|--------|
| 1 | 1.00        | *1        | 6.04    | 1234009.12  | 0.41   |
| 2 | 1.00        | *2        | 10.53   | 00682560.00 | 99.59  |

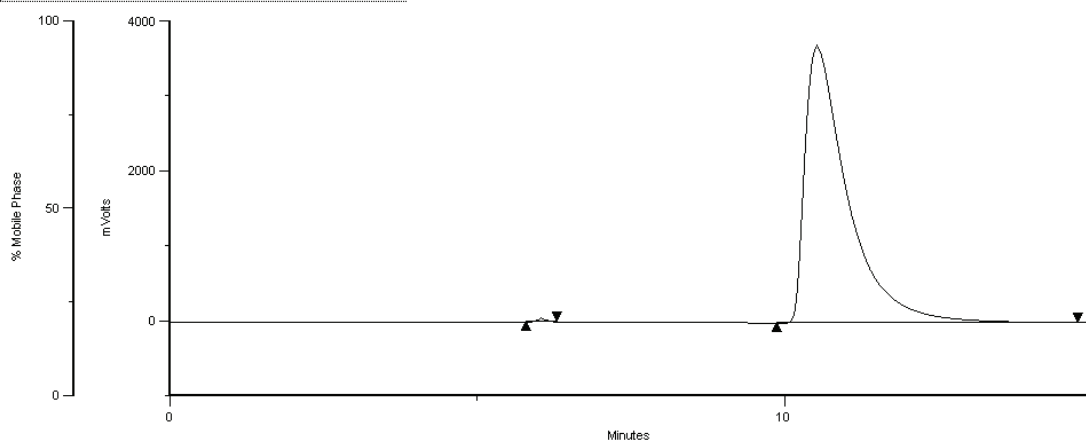

HPLC data compound **23**: Chiralpak IB 10% IPA:hexane, 2 mL min<sup>-1</sup>, 211 nm, 20 °C, 98% ee

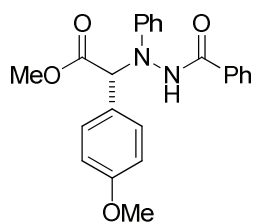

| Inj. Number | Peak Name | R. Time | Area        | Area % |
|-------------|-----------|---------|-------------|--------|
| 1           | *1        | 19.26   | 5718732.00  | 50.56  |
| 2           | *2        | 26.23   | 54485904.00 | 49.44  |

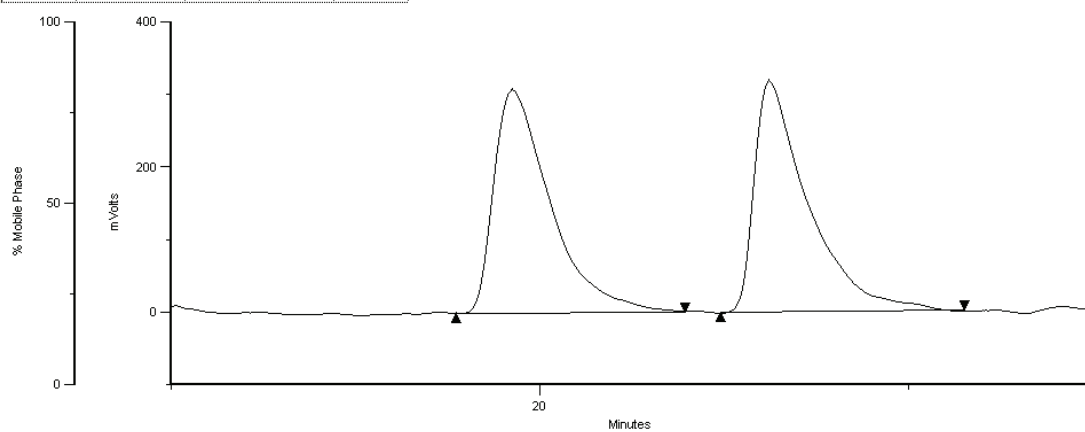

| Inj. Number | Peak Name | R. Time | Area         | Area % |
|-------------|-----------|---------|--------------|--------|
| 1           | *1        | 20.10   | 2015943.62   | 0.97   |
| 2           | 2         | 25.43   | 105419680.00 | 99.03  |

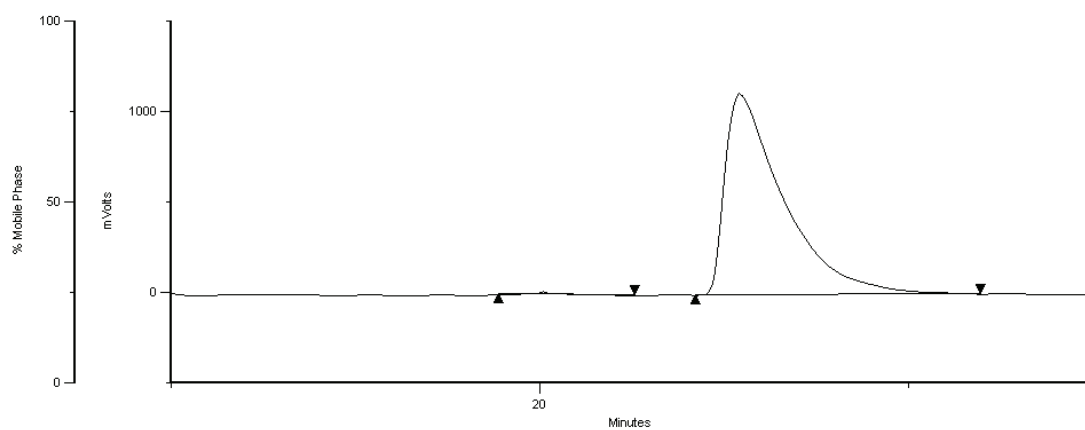

HPLC data compound **24**: Chiralcel OD-H 10% IPA:hexane, 1 mL min<sup>-1</sup>, 211 nm, 20 °C, >99% ee

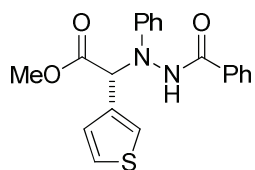

|   | inj. Number | Peak Name | R. Time | Area        | Area % |
|---|-------------|-----------|---------|-------------|--------|
| 1 | 1.00        | *1        | 28.02   | 22289712.00 | 48.13  |
| 2 | 1.00        | 2         | 31.50   | 31778216.00 | 51.87  |

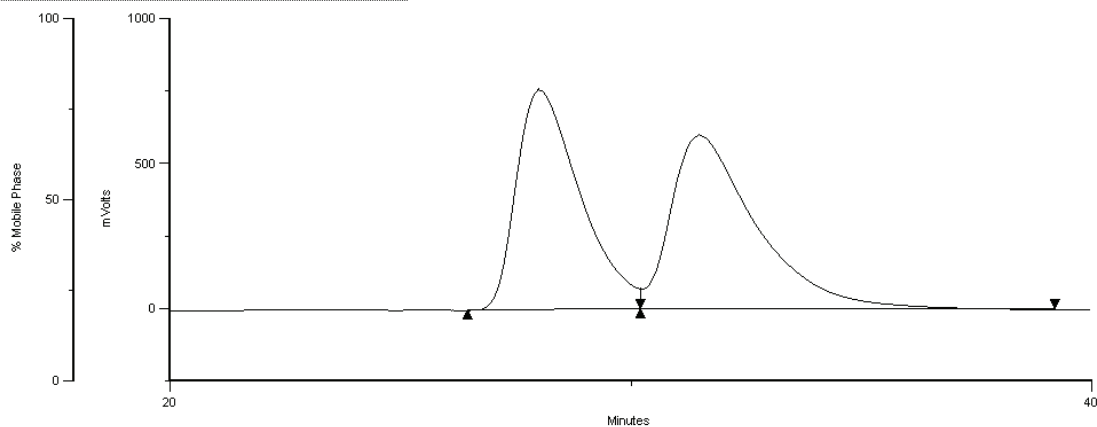

|   | inj. Number | Peak Name | R. Time | Area        | Area % |
|---|-------------|-----------|---------|-------------|--------|
| 1 | 1.00        | *1        | 28.56   | 868532.81   | 0.20   |
| 2 | 1.00        | *2        | 30.76   | 42654976.00 | 99.80  |

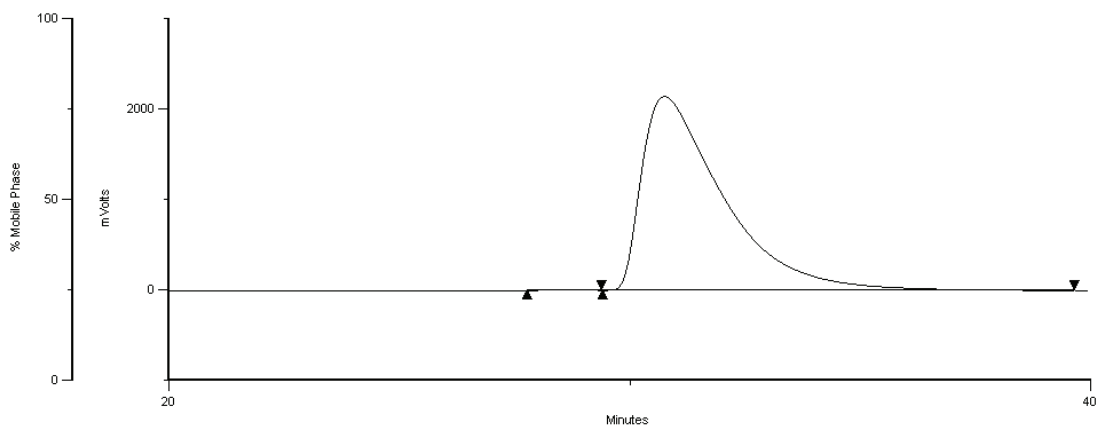

HPLC data compound **25**: Chiralcel OD-H 10% IPA:hexane, 2 mL min<sup>-1</sup>, 211 nm, 20 °C, >99% ee

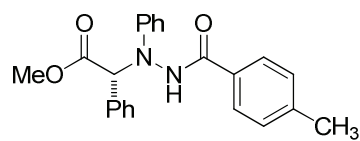

|   | Inj. Number | Peak Name | R. Time | Area        | Area % |
|---|-------------|-----------|---------|-------------|--------|
| 1 | 1.00        | *1        | 11.90   | 76088096.00 | 49.03  |
| 2 | 1.00        | 2         | 14.27   | 83044944.00 | 50.97  |

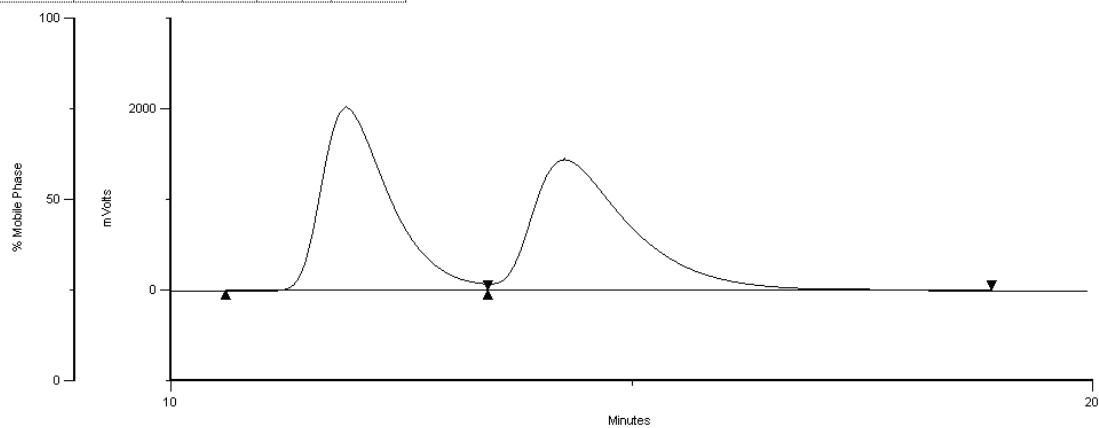

|   | Inj. Number | Peak Name | R. Time | Area        | Area % |
|---|-------------|-----------|---------|-------------|--------|
| 1 | 1.00        | *1        | 12.36   | 522850.00   | 0.21   |
| 2 | 1.00        | *2        | 14.22   | 47685904.00 | 99.79  |

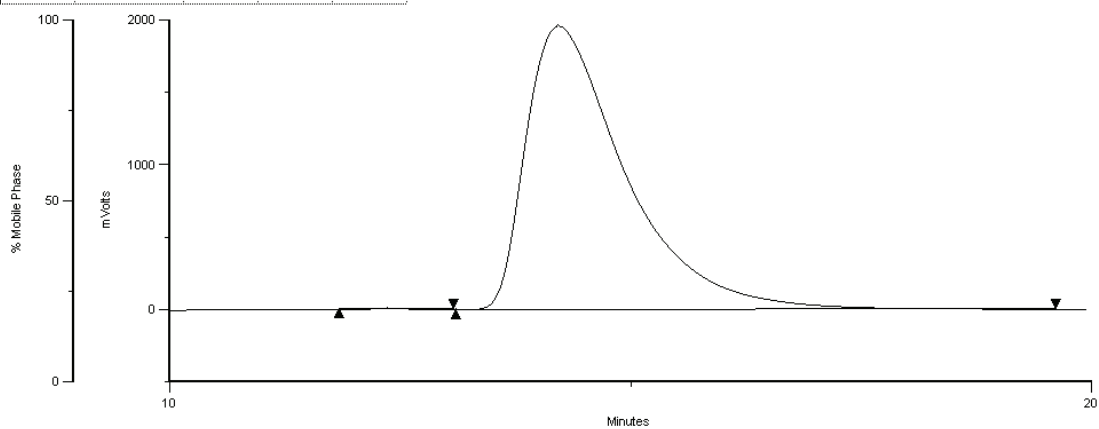

HPLC data compound **26**: Chiralpak IB 10% IPA:hexane, 1 mL min<sup>-1</sup>, 211 nm, 20 °C, 99% ee

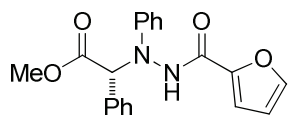

|   | inj. Number | Peak Name | R. Time | Area        | Area % |
|---|-------------|-----------|---------|-------------|--------|
| 1 | 1.00        | *1        | 16.15   | 32587504.00 | 51.92  |
| 2 | 1.00        | 2         | 21.45   | 35727664.00 | 48.08  |

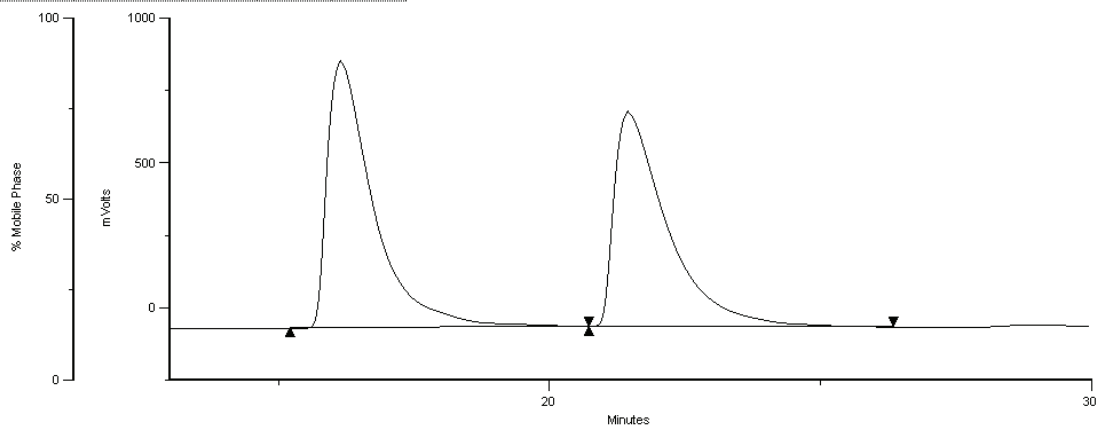

|   | inj. Number | Peak Name | R. Time | Area         | Area % |
|---|-------------|-----------|---------|--------------|--------|
| 1 | 1.00        | *1        | 15.92   | 479216.22    | 0.44   |
| 2 | 1.00        | *2        | 20.35   | 108939312.00 | 99.56  |

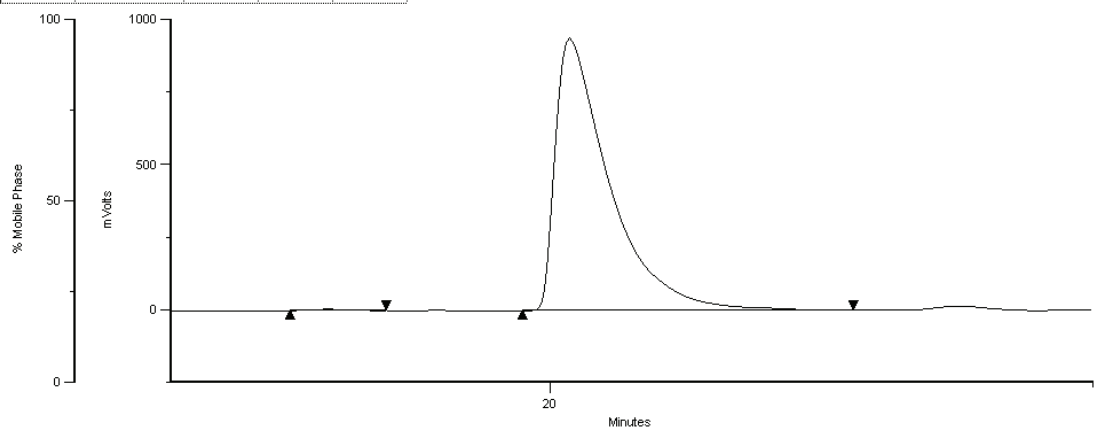

HPLC data compound **27**: Chiralpak IA 40% IPA:hexane, 2 mL min<sup>-1</sup>, 211 nm, 20 °C, 99% ee

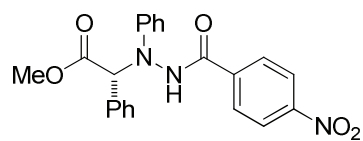

|   | Inj. Number | Peak Name | R. Time | Area        | Area % |
|---|-------------|-----------|---------|-------------|--------|
| 1 | 1.00        | *1        | 20.85   | 12706840.00 | 50.68  |
| 2 | 1.00        | 2         | 30.61   | 99684272.00 | 49.32  |

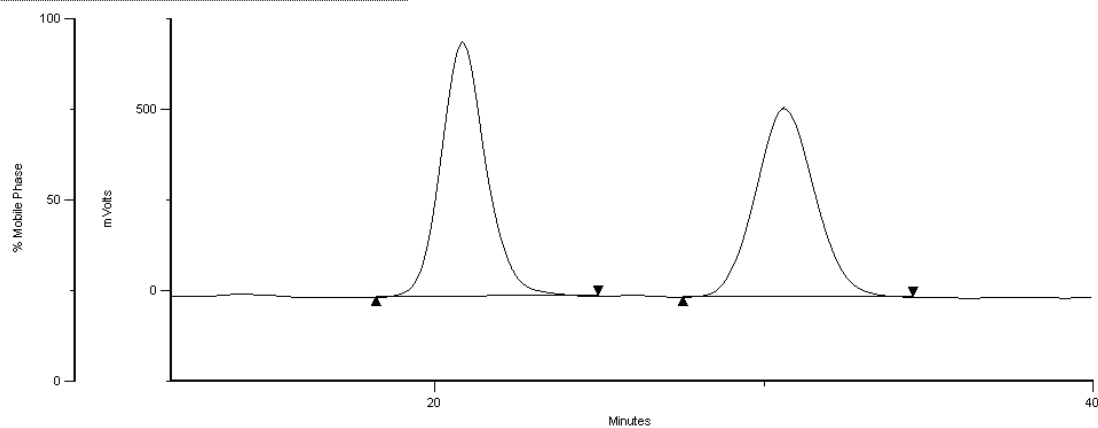

|   | Inj. Number | Peak Name | R. Time | Area        | Area % |
|---|-------------|-----------|---------|-------------|--------|
| 1 | 1.00        | *1        | 20.08   | 1152797.50  | 0.33   |
| 2 | 1.00        | *2        | 30.81   | 43330560.00 | 99.67  |

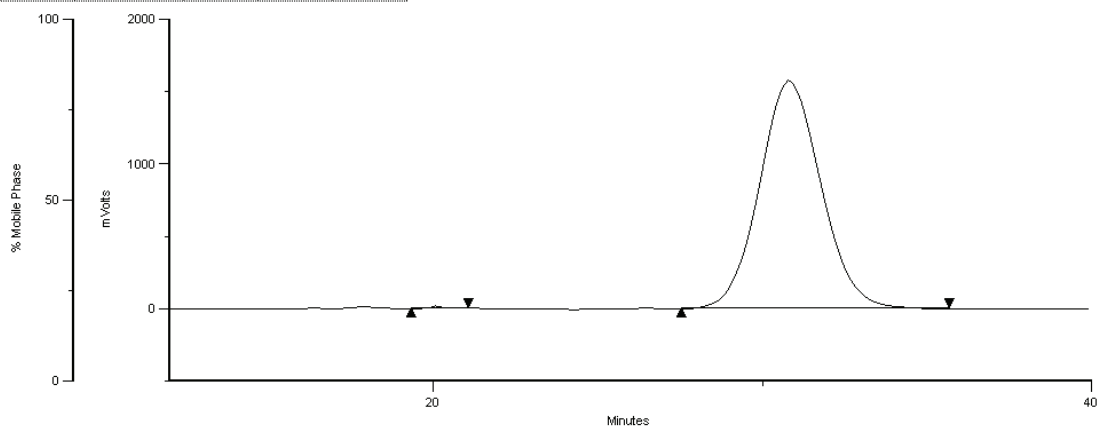



HPLC data compound **28**: Chiralpak IA 40% IPA:hexane, 1 mL min<sup>-1</sup>, 211 nm, 20 °C, 99% ee

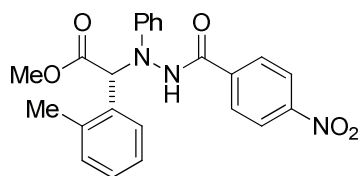

|   | Inj. Number | Peak Name | R. Time | Area        | Area % |
|---|-------------|-----------|---------|-------------|--------|
| 1 | 1.00        | *1        | 11.68   | 38162592.00 | 49.96  |
| 2 | 1.00        | *2        | 16.08   | 38300576.00 | 50.04  |

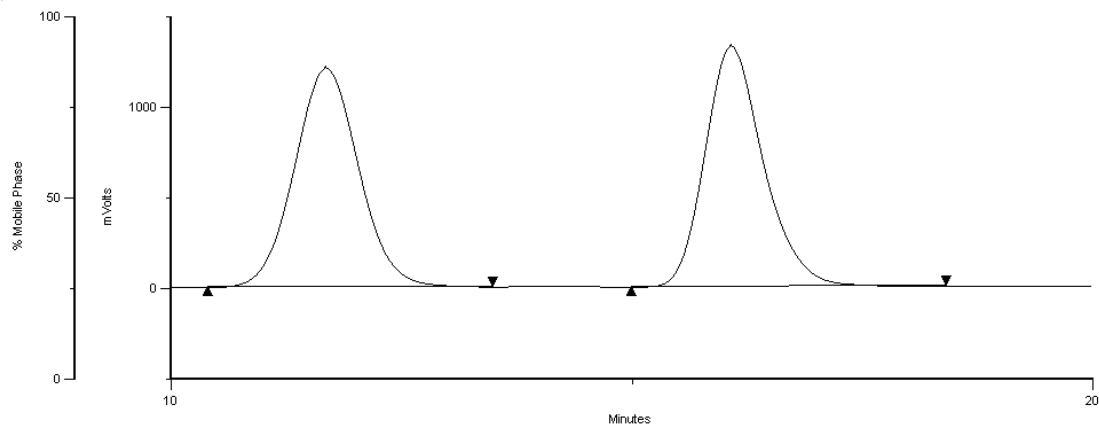

|   | Inj. Number | Peak Name | R. Time | Area         | Area % |
|---|-------------|-----------|---------|--------------|--------|
| 1 | 1.00        | *1        | 11.67   | 655594.69    | 0.33   |
| 2 | 1.00        | *2        | 16.32   | 100501328.00 | 99.67  |

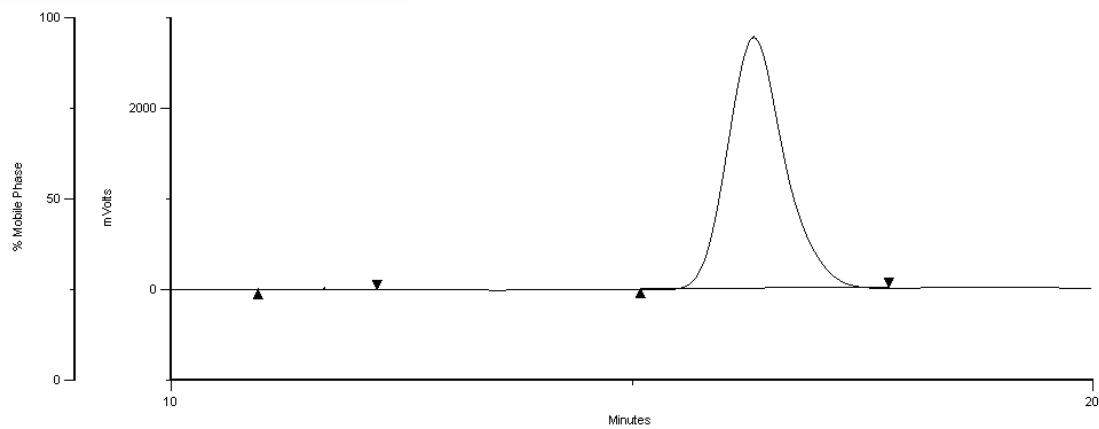

HPLC data compound **29**: Chiralpak IA 40% IPA:hexane, 1 mL min<sup>-1</sup>, 211 nm, 20 °C, 99% ee

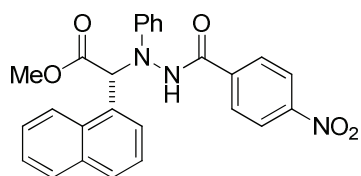

|   | inj. Number | Peak Name | R. Time | Area        | Area % |
|---|-------------|-----------|---------|-------------|--------|
| 1 | 1.00        | *1        | 13.22   | 43556432.00 | 50.27  |
| 2 | 1.00        | *2        | 29.04   | 42018296.00 | 49.73  |

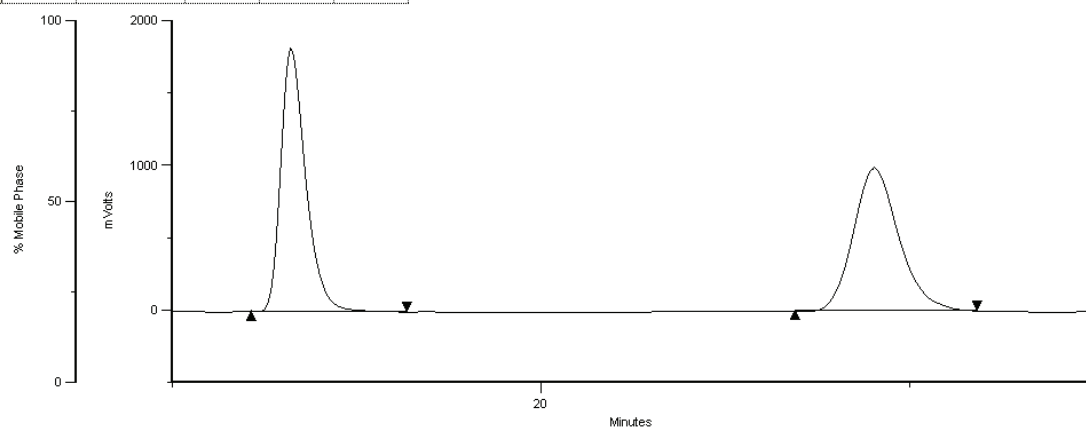

|   | inj. Number | Peak Name | R. Time | Area        | Area % |
|---|-------------|-----------|---------|-------------|--------|
| 1 | 1.00        | *1        | 13.41   | 2681767.75  | 0.74   |
| 2 | 1.00        | *2        | 29.22   | 57990976.00 | 99.26  |

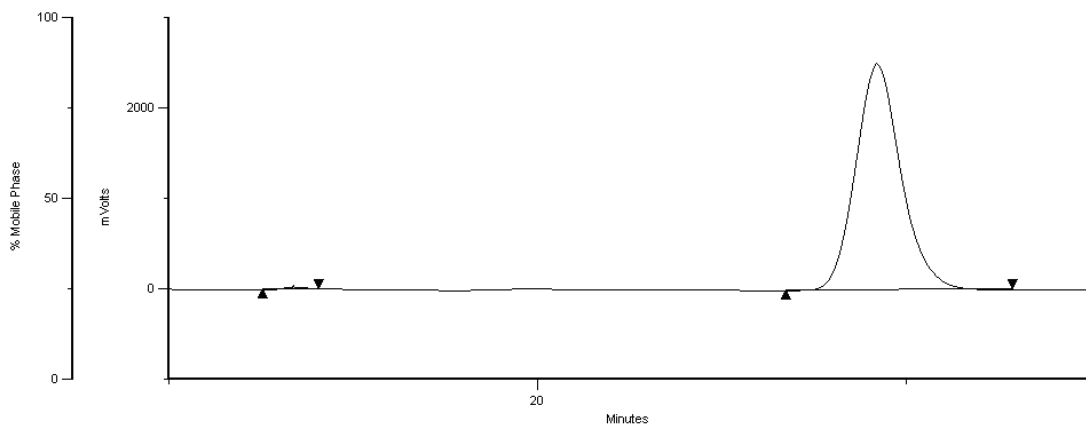

HPLC data compound **30**: Chiralpak IA 80% IPA:hexane, 1 mL min<sup>-1</sup>, 211 nm, 40 °C, 97% ee

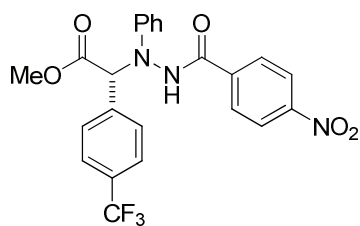

PDA Ch3 211nm

| Peak# | Ret. Time | Area%   |
|-------|-----------|---------|
| 1     | 7.488     | 50.993  |
| 2     | 17.774    | 49.007  |
| Total |           | 100.000 |

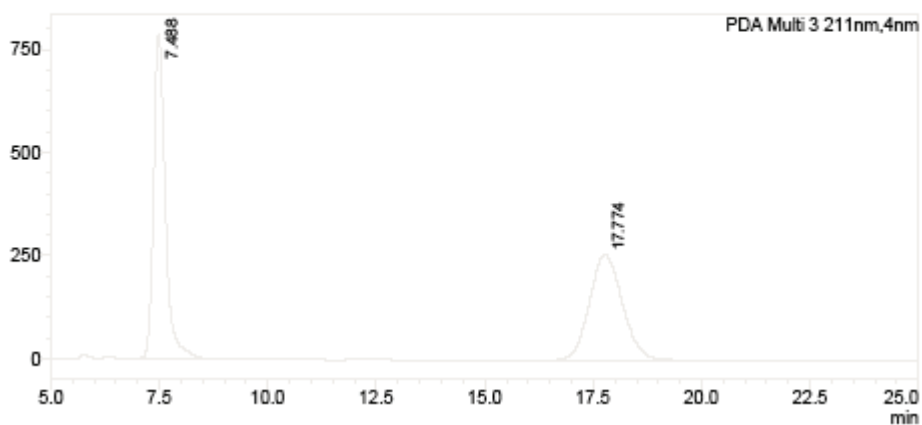

PDA Ch2 211nm

| Peak# | Ret. Time | Area%   |
|-------|-----------|---------|
| 1     | 7.445     | 1.388   |
| 2     | 17.613    | 98.632  |
| Total |           | 100.000 |

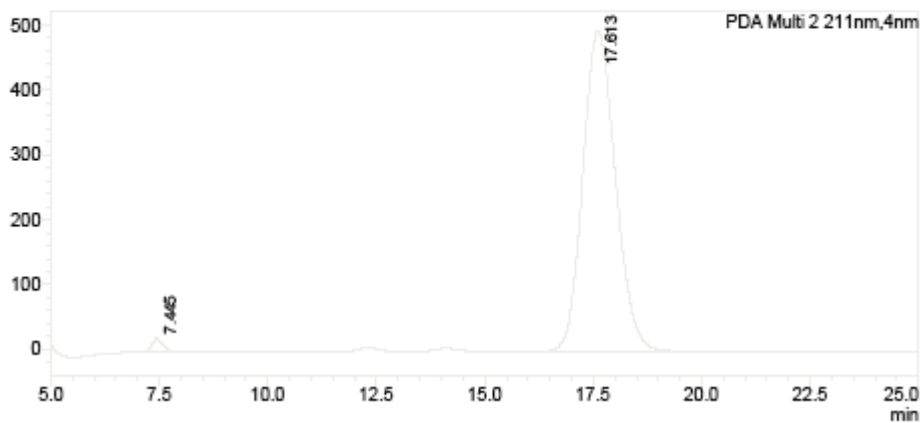

HPLC data compound **31**: Chiralpak IA 80% IPA:hexane, 1 mL min<sup>-1</sup>, 254 nm, 40 °C, 98% ee

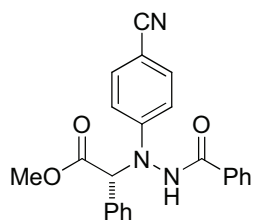

PDA Ch1 254nm

| Peak# | Ret. Time | Area%   |
|-------|-----------|---------|
| 1     | 5.815     | 49.834  |
| 2     | 12.930    | 50.366  |
| Total |           | 100.000 |

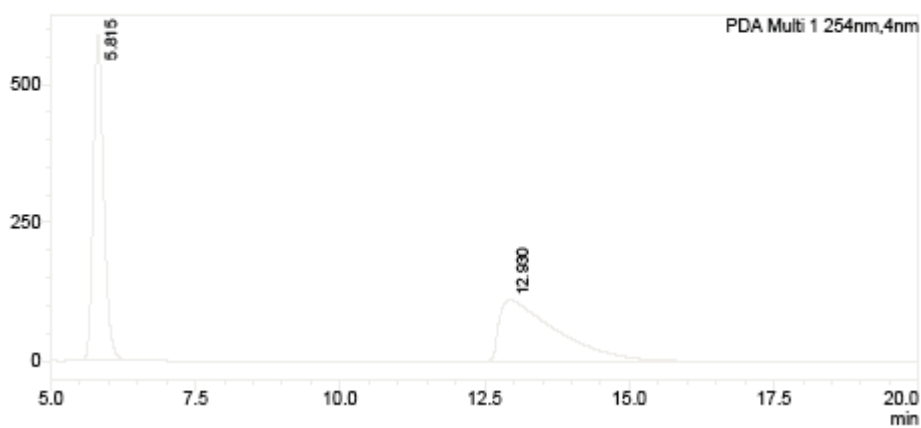

PDA Ch1 254nm

| Peak# | Ret. Time | Area%   |
|-------|-----------|---------|
| 1     | 5.736     | 98.918  |
| 2     | 14.356    | 1.082   |
| Total |           | 100.000 |

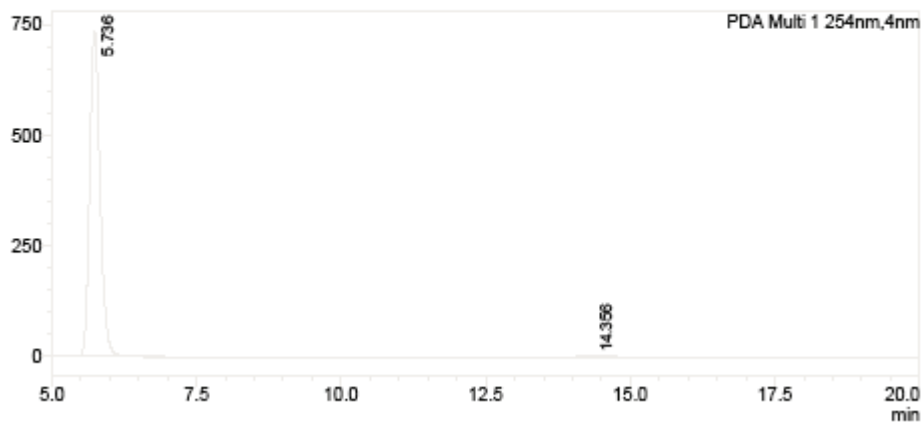

HPLC data compound **32**: Chiralpak IA 30% IPA:hexane, 2 mL min<sup>-1</sup>, 211 nm, 20 °C, 99% ee

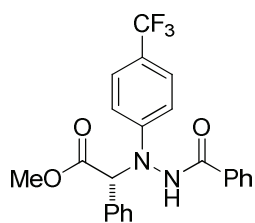

| Inj. Number | Peak Name | R. Time | Area        | Area % |
|-------------|-----------|---------|-------------|--------|
| 1           | *1        | 8.95    | 02382880.00 | 48.58  |
| 2           | *2        | 15.50   | 08357416.00 | 51.42  |

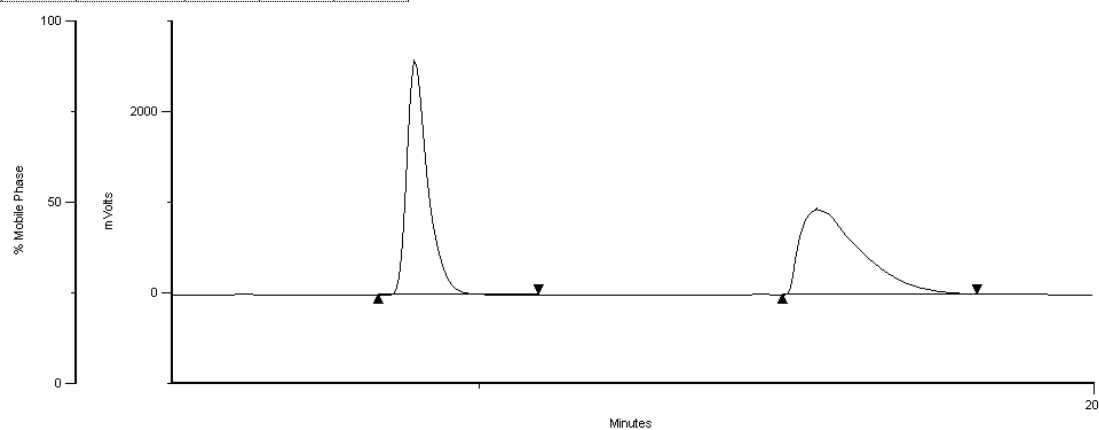

| Inj. Number | Peak Name | R. Time | Area        | Area % |
|-------------|-----------|---------|-------------|--------|
| 1           | *1        | 8.85    | 22838440.00 | 99.38  |
| 2           | 2         | 15.92   | 766629.19   | 0.62   |

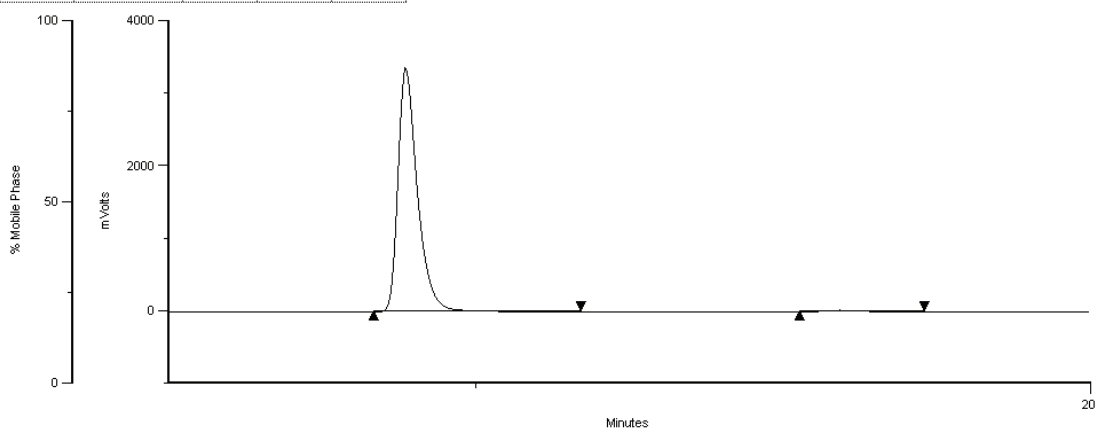

HPLC data compound **33**: Chiralpak IA 50% IPA:hexane, 2 mL min<sup>-1</sup>, 211 nm, 20 °C, 99% ee

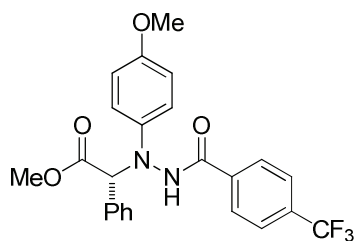

|   | Inj. Number | Peak Name | R. Time | Area        | Area % |
|---|-------------|-----------|---------|-------------|--------|
| 1 | 1.00        | *1        | 18.97   | 60329136.00 | 48.51  |
| 2 | 1.00        | *2        | 34.69   | 70188032.00 | 51.49  |

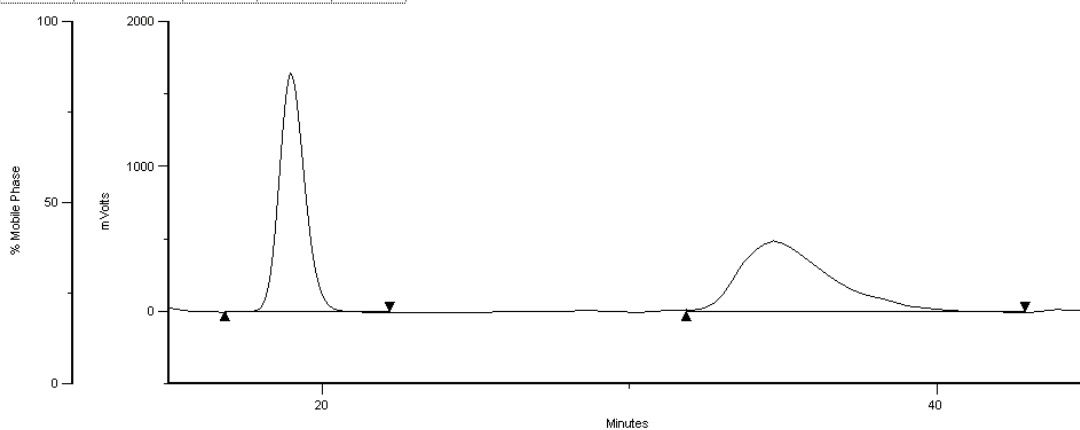

|   | Inj. Number | Peak Name | R. Time | Area        | Area % |
|---|-------------|-----------|---------|-------------|--------|
| 1 | 1.00        | *1        | 18.66   | 79143200.00 | 99.63  |
| 2 | 1.00        | *2        | 36.86   | 1418129.75  | 0.37   |

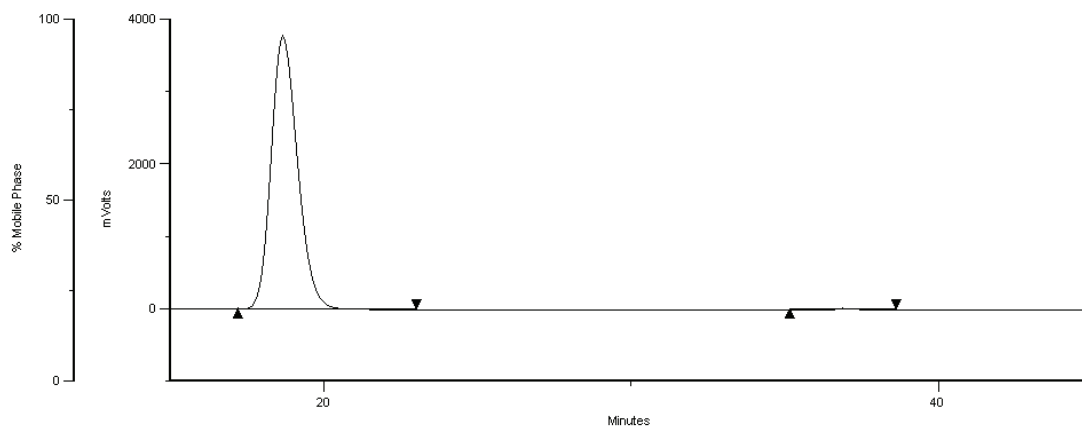

HPLC data compound **34**: Chiralpak IA 50% IPA:hexane, 1 mL min<sup>-1</sup>, 211 nm, 20 °C, 99% ee

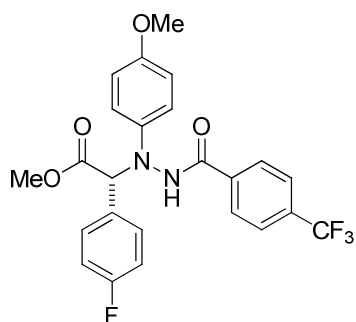

|   | Inj. Number | Peak Name | R. Time | Area        | Area % |
|---|-------------|-----------|---------|-------------|--------|
| 1 | 1.00        | *1        | 16.96   | 94616840.00 | 49.03  |
| 2 | 1.00        | *2        | 26.41   | 98373592.00 | 50.97  |

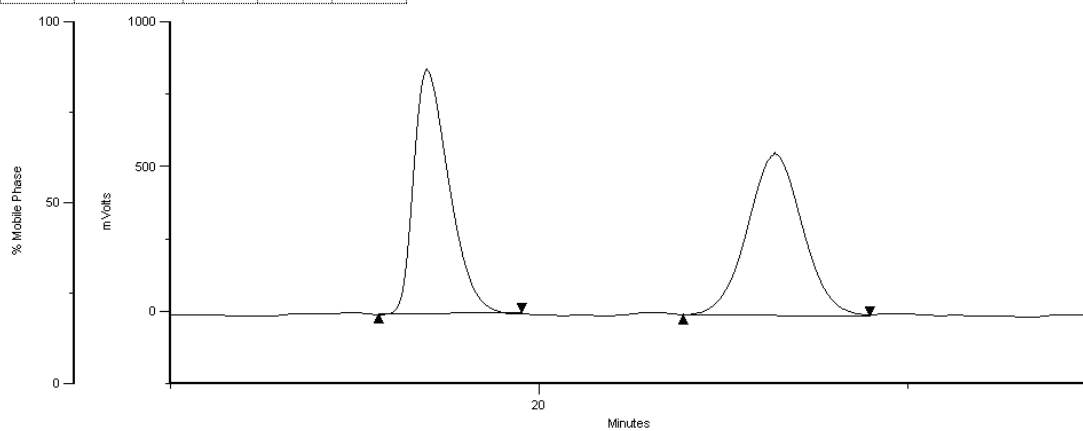

|   | Inj. Number | Peak Name | R. Time | Area        | Area % |
|---|-------------|-----------|---------|-------------|--------|
| 1 | 1.00        | *1        | 17.62   | 1103944.62  | 0.59   |
| 2 | 1.00        | *2        | 26.58   | 87317104.00 | 99.41  |

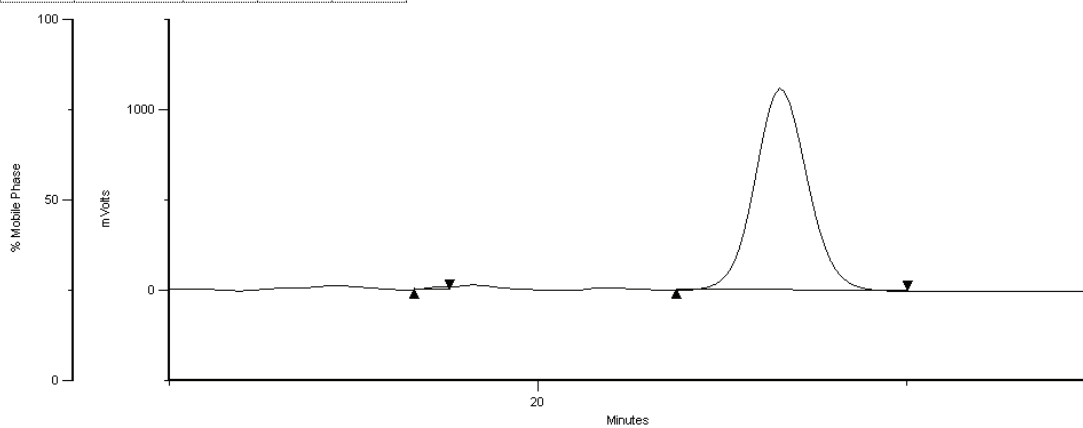

HPLC data compound **35**: Chiralpak IB 20% IPA:hexane, 1 mL min<sup>-1</sup>, 211 nm, 20 °C, 98% ee

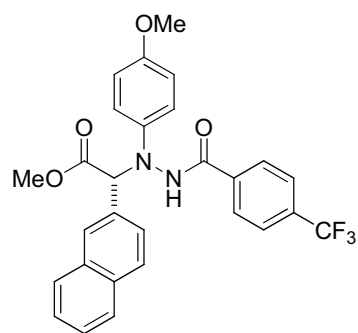

|   | inj. Number | Peak Name | R. Time | Area        | Area % |
|---|-------------|-----------|---------|-------------|--------|
| 1 | 1.00        | *1        | 12.47   | 04331272.00 | 47.00  |
| 2 | 1.00        | 2         | 14.47   | 17663008.00 | 53.00  |

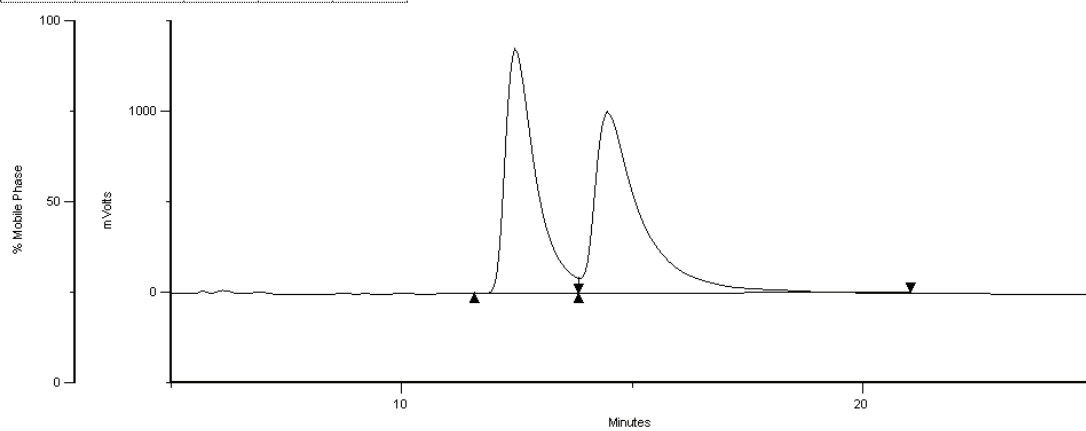

|   | inj. Number | Peak Name | R. Time | Area        | Area % |
|---|-------------|-----------|---------|-------------|--------|
| 1 | 1.00        | *1        | 12.80   | 2883634.50  | 0.85   |
| 2 | 1.00        | *2        | 14.16   | 37361120.00 | 99.15  |

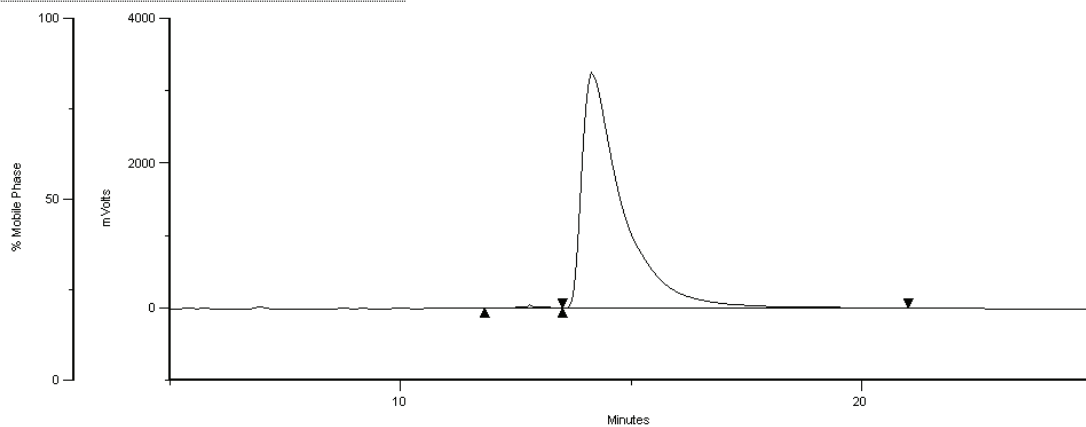



HPLC data compound **36**: Chiralpak IA 40% IPA:hexane, 1 mL min<sup>-1</sup>, 211 nm, 30 °C, 98% ee

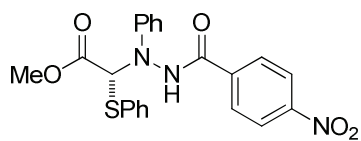

PDA Ch2 211nm

| Peak# | Ret. Time | Area%   |
|-------|-----------|---------|
| 1     | 13.104    | 50.269  |
| 2     | 20.199    | 49.731  |
| Total |           | 100.000 |

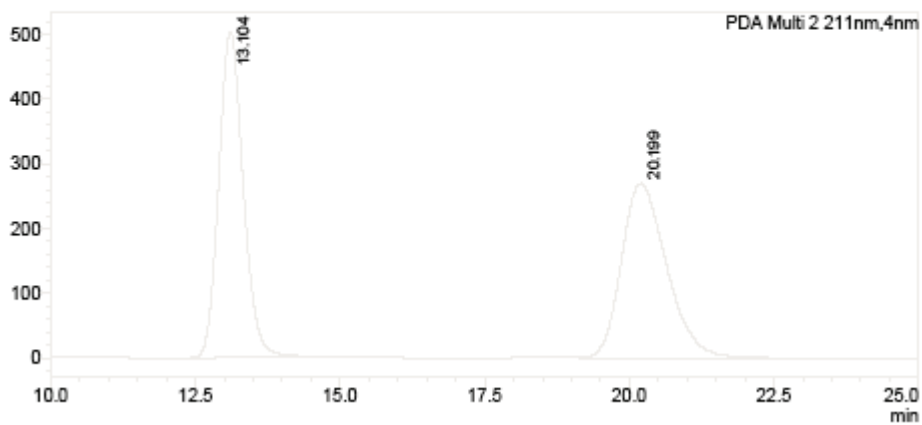

PDA Ch3 211nm

| Peak# | Ret. Time | Area%   |
|-------|-----------|---------|
| 1     | 13.233    | 98.797  |
| 2     | 20.691    | 1.203   |
| Total |           | 100.000 |

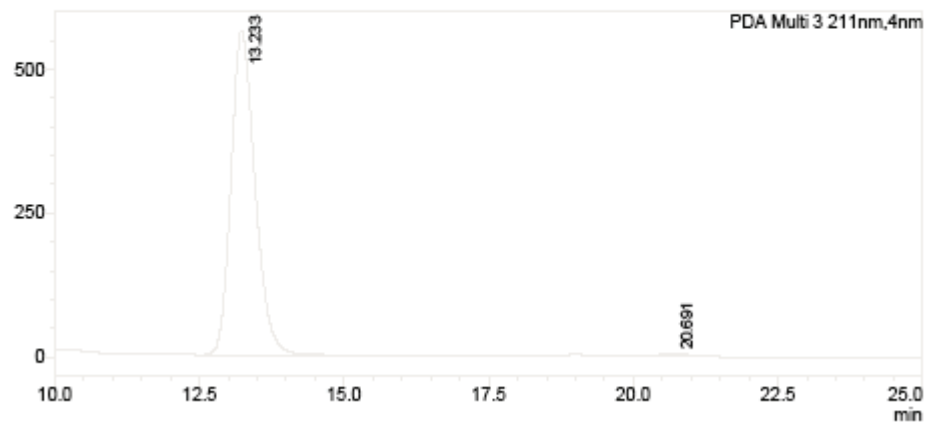

HPLC data compound **37**: Chiralpak AD-H 20% IPA:hexane, 1 mL min<sup>-1</sup>, 211 nm, 30 °C, 83% ee

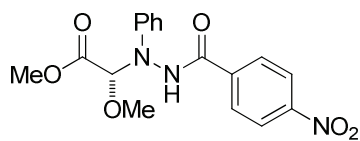

PDA Ch2 211nm

| Peak# | Ret. Time | Area%   |
|-------|-----------|---------|
| 1     | 22.387    | 49.935  |
| 2     | 24.741    | 50.065  |
| Total |           | 100.000 |

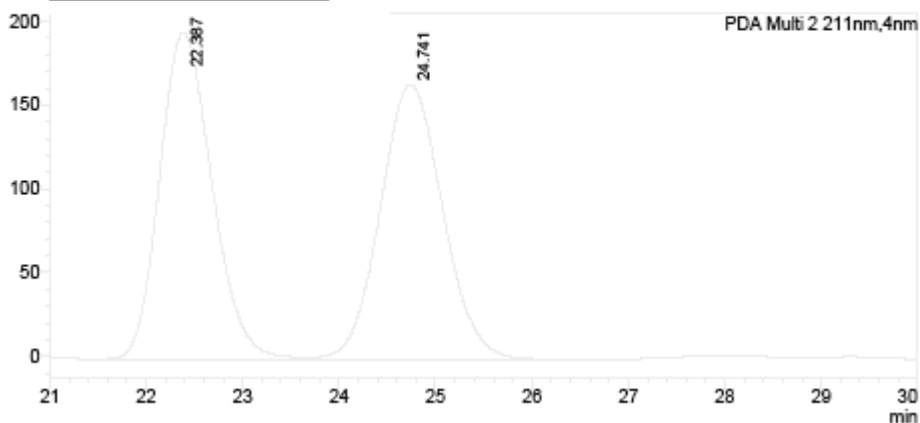

PDA Ch2 211nm

| Peak# | Ret. Time | Area%   |
|-------|-----------|---------|
| 1     | 22.407    | 8.706   |
| 2     | 24.734    | 91.294  |
| Total |           | 100.000 |

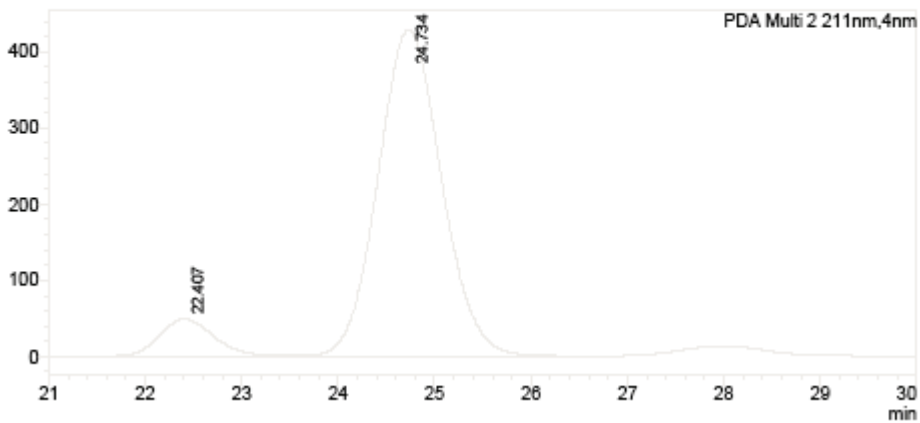

HPLC data compound **38**: Chiralpak IA 40% IPA:hexane, 1 mL min<sup>-1</sup>, 211 nm, 30 °C, 99% ee

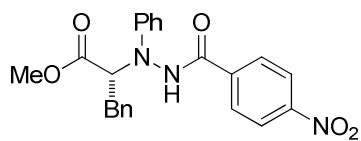

PDA.Ch2.211nm

| Peak# | Ret. Time | Area%   |
|-------|-----------|---------|
| 1     | 9.802     | 50.319  |
| 2     | 18.100    | 49.681  |
| Total |           | 100.000 |

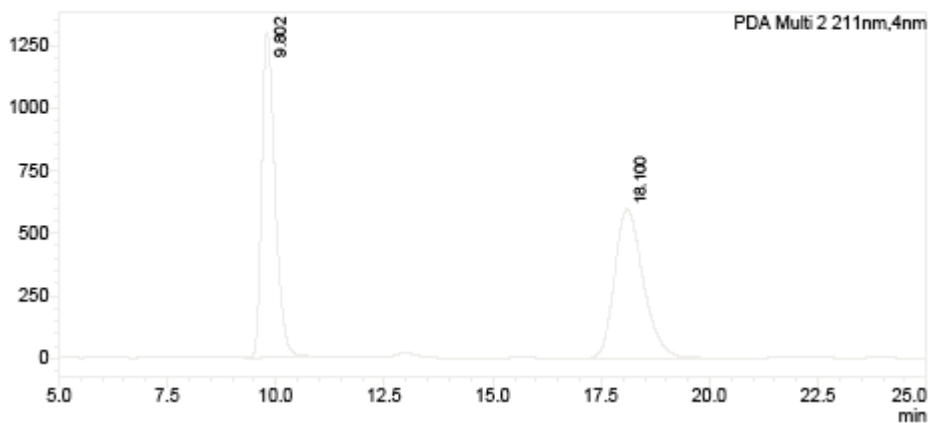

PDA.Ch2.211nm

| Peak# | Ret. Time | Area%   |
|-------|-----------|---------|
| 1     | 9.827     | 99.395  |
| 2     | 18.117    | 0.605   |
| Total |           | 100.000 |

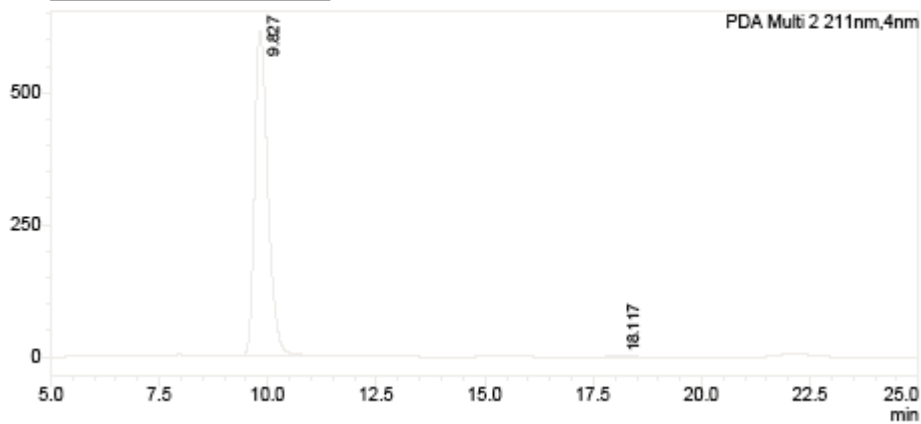

HPLC data compound **39**: Chiralpak AD-H 30% IPA:hexane, 1 mL min<sup>-1</sup>, 254 nm, 30 °C, >99% ee

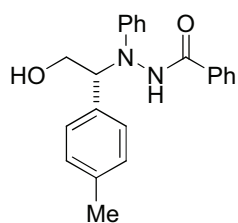

PDA Ch1 254nm

| Peak# | Ret. Time | Area%   |
|-------|-----------|---------|
| 1     | 7.412     | 49.859  |
| 2     | 10.713    | 50.141  |
| Total |           | 100.000 |

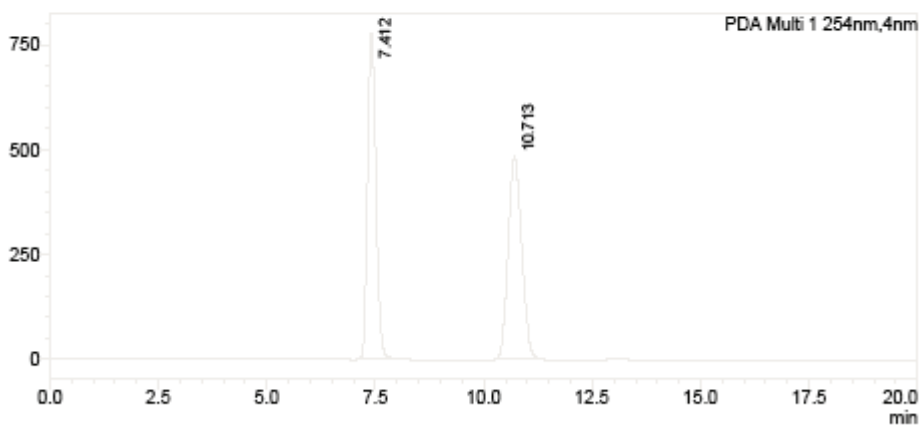

PDA Ch1 254nm

| Peak# | Ret. Time | Area%   |
|-------|-----------|---------|
| 1     | 7.430     | 99.789  |
| 2     | 10.813    | 0.211   |
| Total |           | 100.000 |

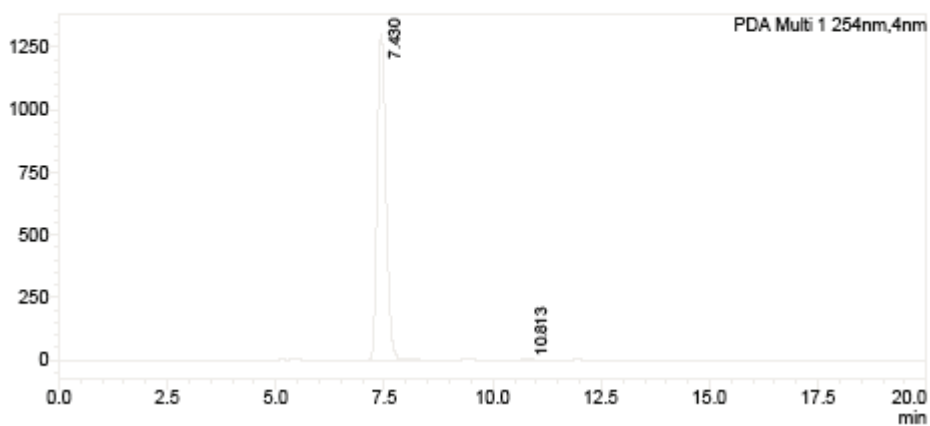

HPLC data compound **40**: Chiralcel OJ-H 30% IPA:hexane, 1 mL min<sup>-1</sup>, 220 nm, 30 °C, 99% ee

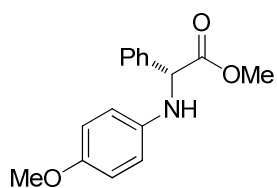

| PDA Ch2 220nm |           |         |
|---------------|-----------|---------|
| Peak#         | Ret. Time | Area%   |
| 1             | 28.076    | 50.021  |
| 2             | 30.938    | 49.979  |
| Total         |           | 100.000 |

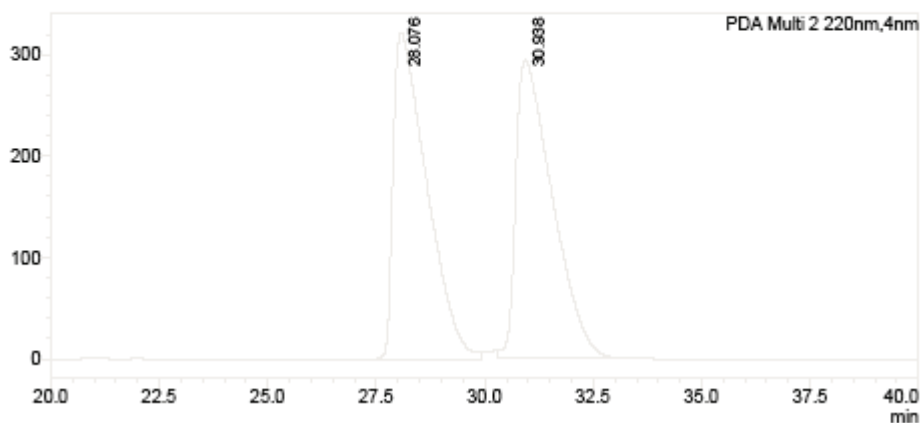

| PDA Ch2 220nm |           |         |
|---------------|-----------|---------|
| Peak#         | Ret. Time | Area%   |
| 1             | 27.595    | 99.647  |
| 2             | 31.709    | 0.353   |
| Total         |           | 100.000 |

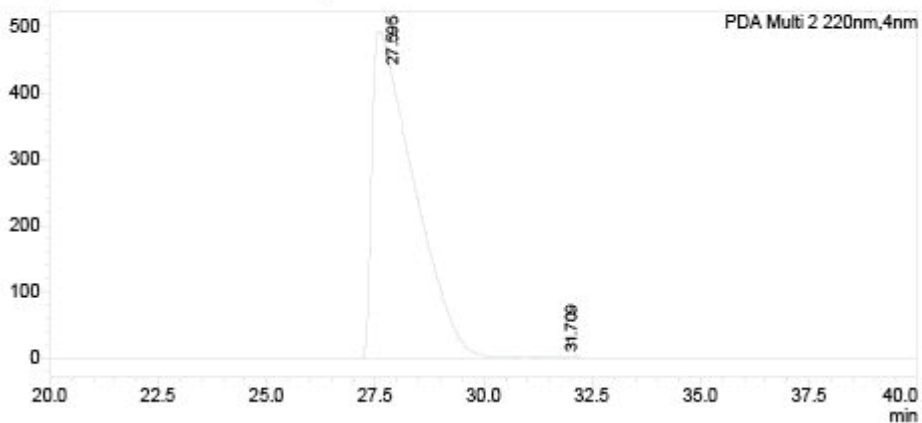

HPLC data compound **41**: Chiralpak AD-H 10% IPA:hexane, 1 mL min<sup>-1</sup>, 211 nm, 30 °C, 98% ee

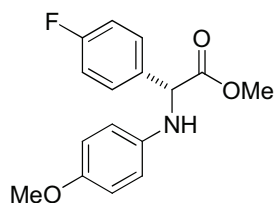

PDA Ch1 211nm

| Peak# | Ret. Time | Area%   |
|-------|-----------|---------|
| 1     | 13.689    | 50.092  |
| 2     | 15.917    | 49.908  |
| Total |           | 100.000 |

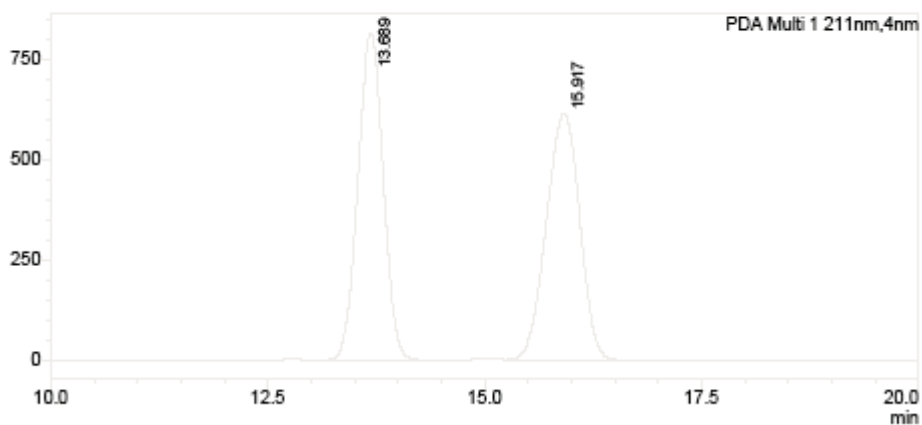

PDA Ch2 220nm

| Peak# | Ret. Time | Area%   |
|-------|-----------|---------|
| 1     | 13.741    | 1.057   |
| 2     | 15.985    | 98.943  |
| Total |           | 100.000 |

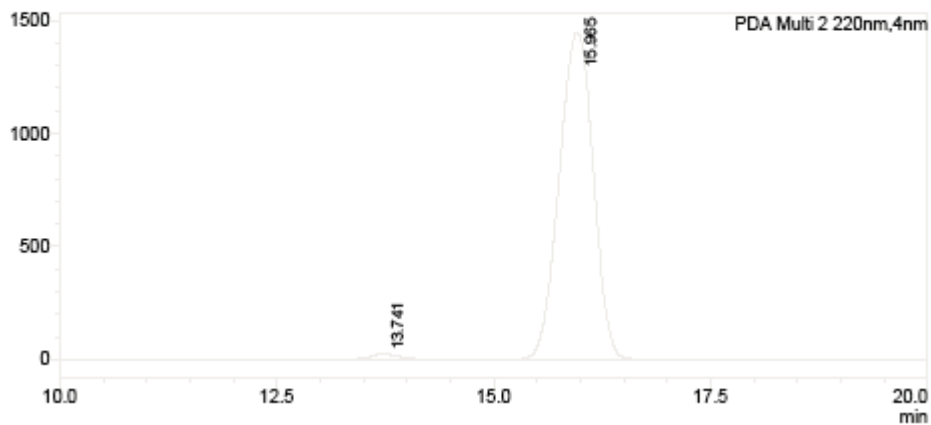

HPLC data compound **42**: Chiralpak IB 20% IPA:hexane, 1 mL min<sup>-1</sup>, 220 nm, 30 °C, 98% ee

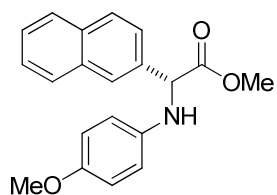

| PDA Ch2 220nm |           |         |
|---------------|-----------|---------|
| Peak#         | Ret. Time | Area%   |
| 1             | 30.352    | 50.173  |
| 2             | 33.038    | 49.827  |
| Total         |           | 100.000 |

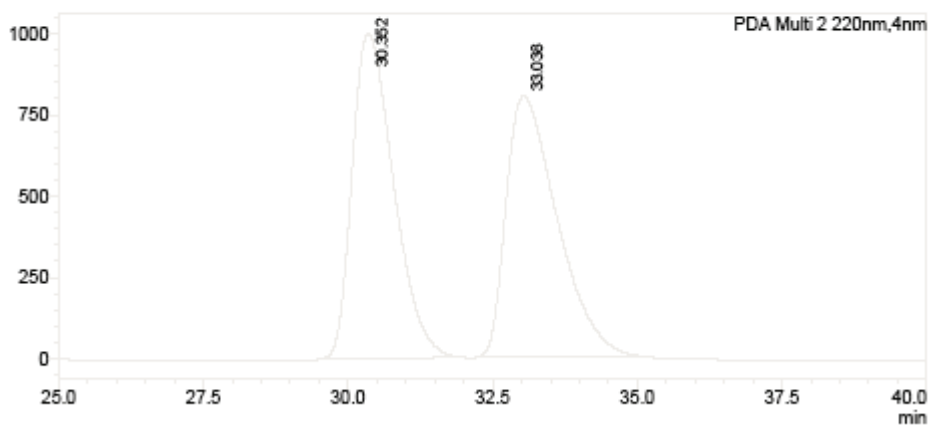

| PDA Ch2 220nm |           |         |
|---------------|-----------|---------|
| Peak#         | Ret. Time | Area%   |
| 1             | 30.125    | 98.847  |
| 2             | 33.615    | 1.153   |
| Total         |           | 100.000 |

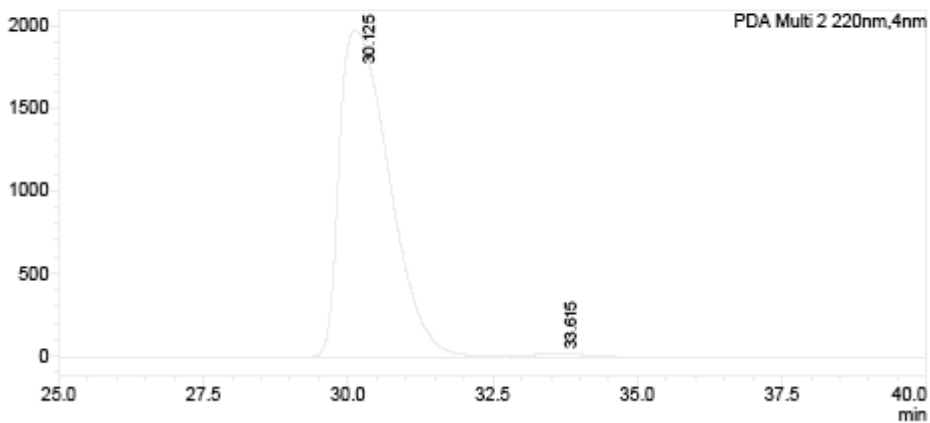

HPLC data compound **43**: Chiralcel OD-H 1% IPA:hexane, 1 mL min<sup>-1</sup>, 211 nm, 30 °C, 99% ee

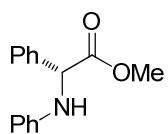

| PDA Ch1 211nm |           |         |
|---------------|-----------|---------|
| Peak#         | Ret. Time | Area%   |
| 1             | 23.699    | 49.953  |
| 2             | 26.111    | 50.047  |
| Total         |           | 100.000 |

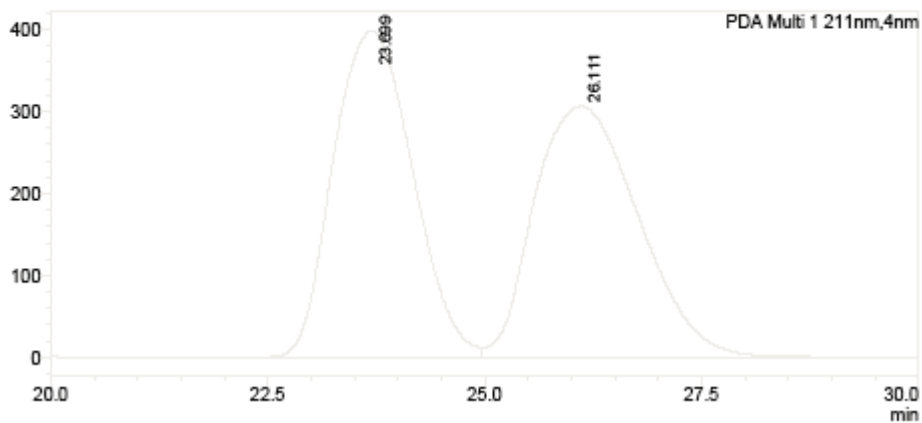

| PDA Ch1 211nm |           |         |
|---------------|-----------|---------|
| Peak#         | Ret. Time | Area%   |
| 1             | 23.207    | 0.488   |
| 2             | 26.180    | 99.512  |
| Total         |           | 100.000 |

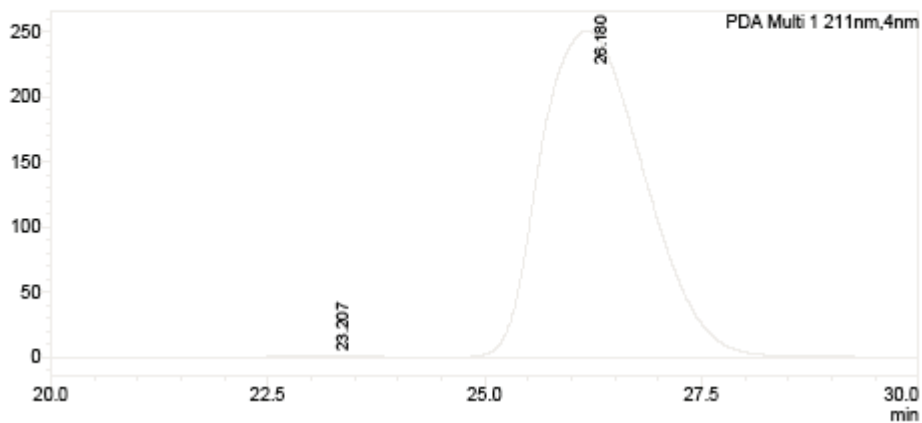



HPLC data compound **44**: Chiralcel OD-H 1% IPA:hexane, 1 mL min<sup>-1</sup>, 211 nm, 30 °C, 98% ee

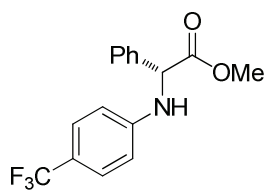

| PDA Ch1 211nm |           |         |
|---------------|-----------|---------|
| Peak#         | Ret. Time | Area%   |
| 1             | 13.572    | 49.641  |
| 2             | 14.722    | 50.359  |
| Total         |           | 100.000 |

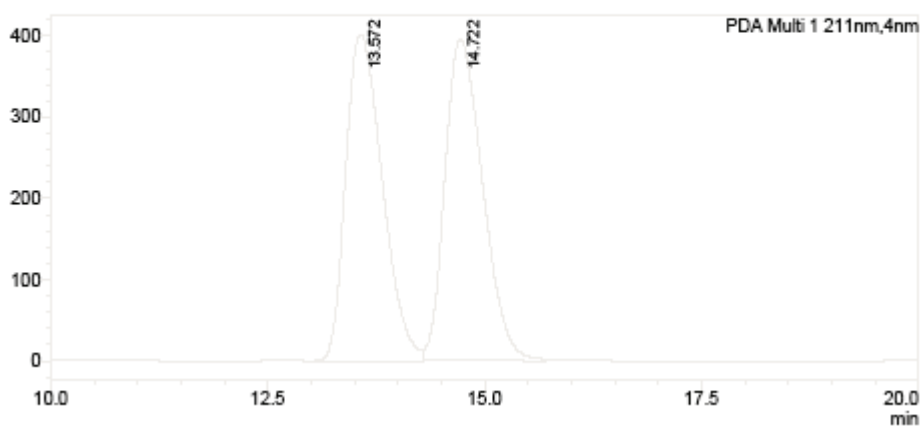

| PDA Ch1 211nm |           |         |
|---------------|-----------|---------|
| Peak#         | Ret. Time | Area%   |
| 1             | 13.630    | 98.763  |
| 2             | 14.969    | 1.237   |
| Total         |           | 100.000 |

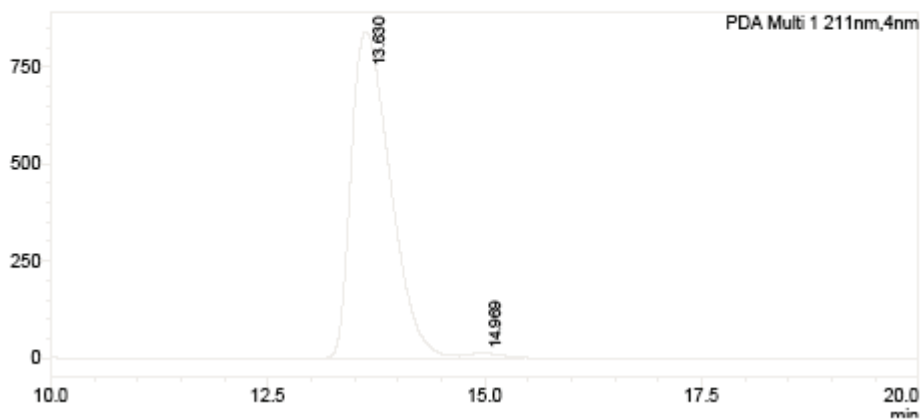

HPLC data compound **83**: Chiralcel OJ-H 10% IPA:hexane, 1 mL min<sup>-1</sup>, 211 nm, 30 °C, 90% ee

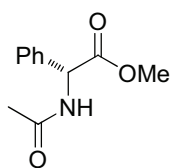

| PDA Ch1 211nm |           |         |
|---------------|-----------|---------|
| Peak#         | Ret. Time | Area%   |
| 1             | 16.103    | 50.227  |
| 2             | 17.900    | 49.773  |
| Total         |           | 100.000 |

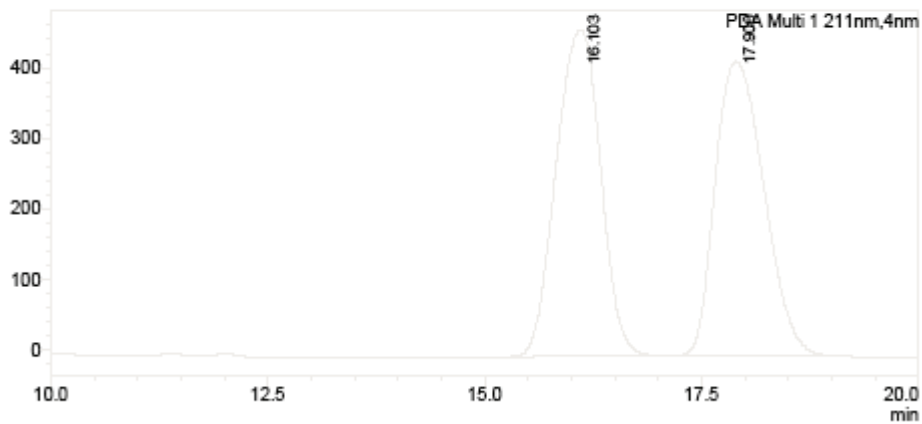

| PDA Ch1 211nm |           |         |
|---------------|-----------|---------|
| Peak#         | Ret. Time | Area%   |
| 1             | 16.077    | 4.872   |
| 2             | 17.957    | 95.128  |
| Total         |           | 100.000 |

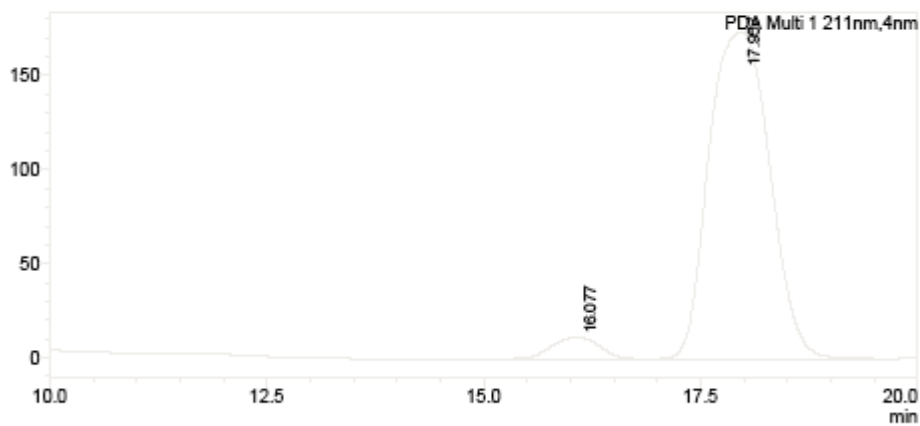

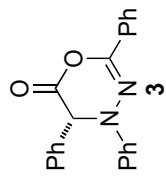

<sup>1</sup>H, CDCl<sub>3</sub>, 400 MHz

7.889  
7.883  
7.878  
7.874  
7.871  
7.868  
7.865  
7.844  
7.835  
7.827  
7.818  
7.812  
7.777  
7.727  
7.726  
7.721  
7.712  
7.206  
7.199  
7.193  
7.178  
7.175  
7.156  
7.153  
7.151  
6.928  
6.926  
6.910  
6.895  
6.892  
6.892  
5.956

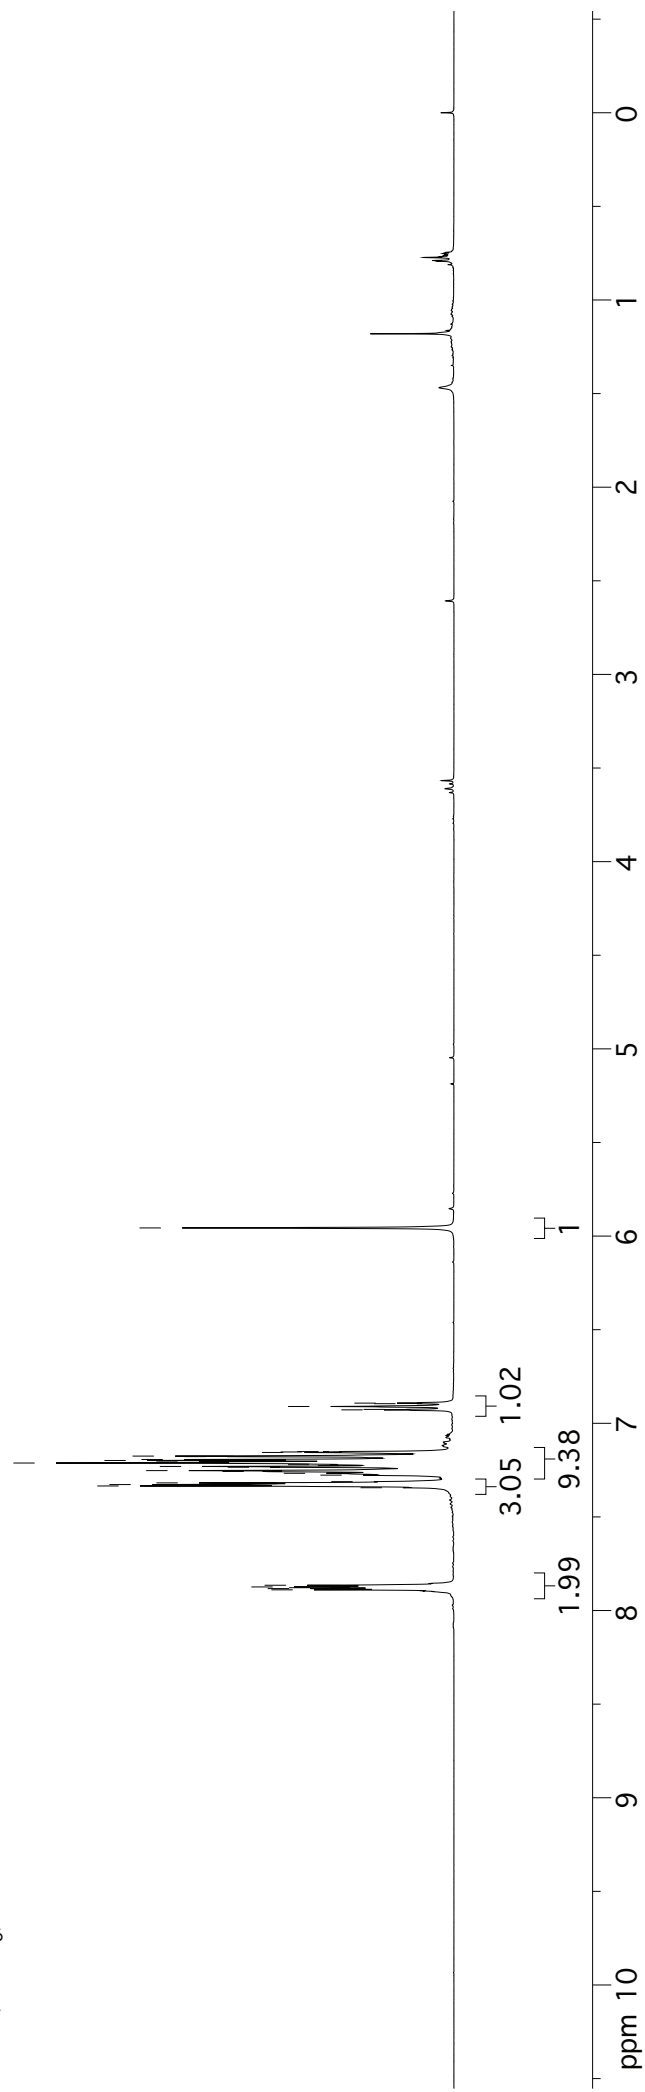

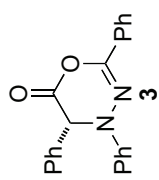

$^{13}\text{C}$ ,  $\text{CDCl}_3$ , 100 MHz

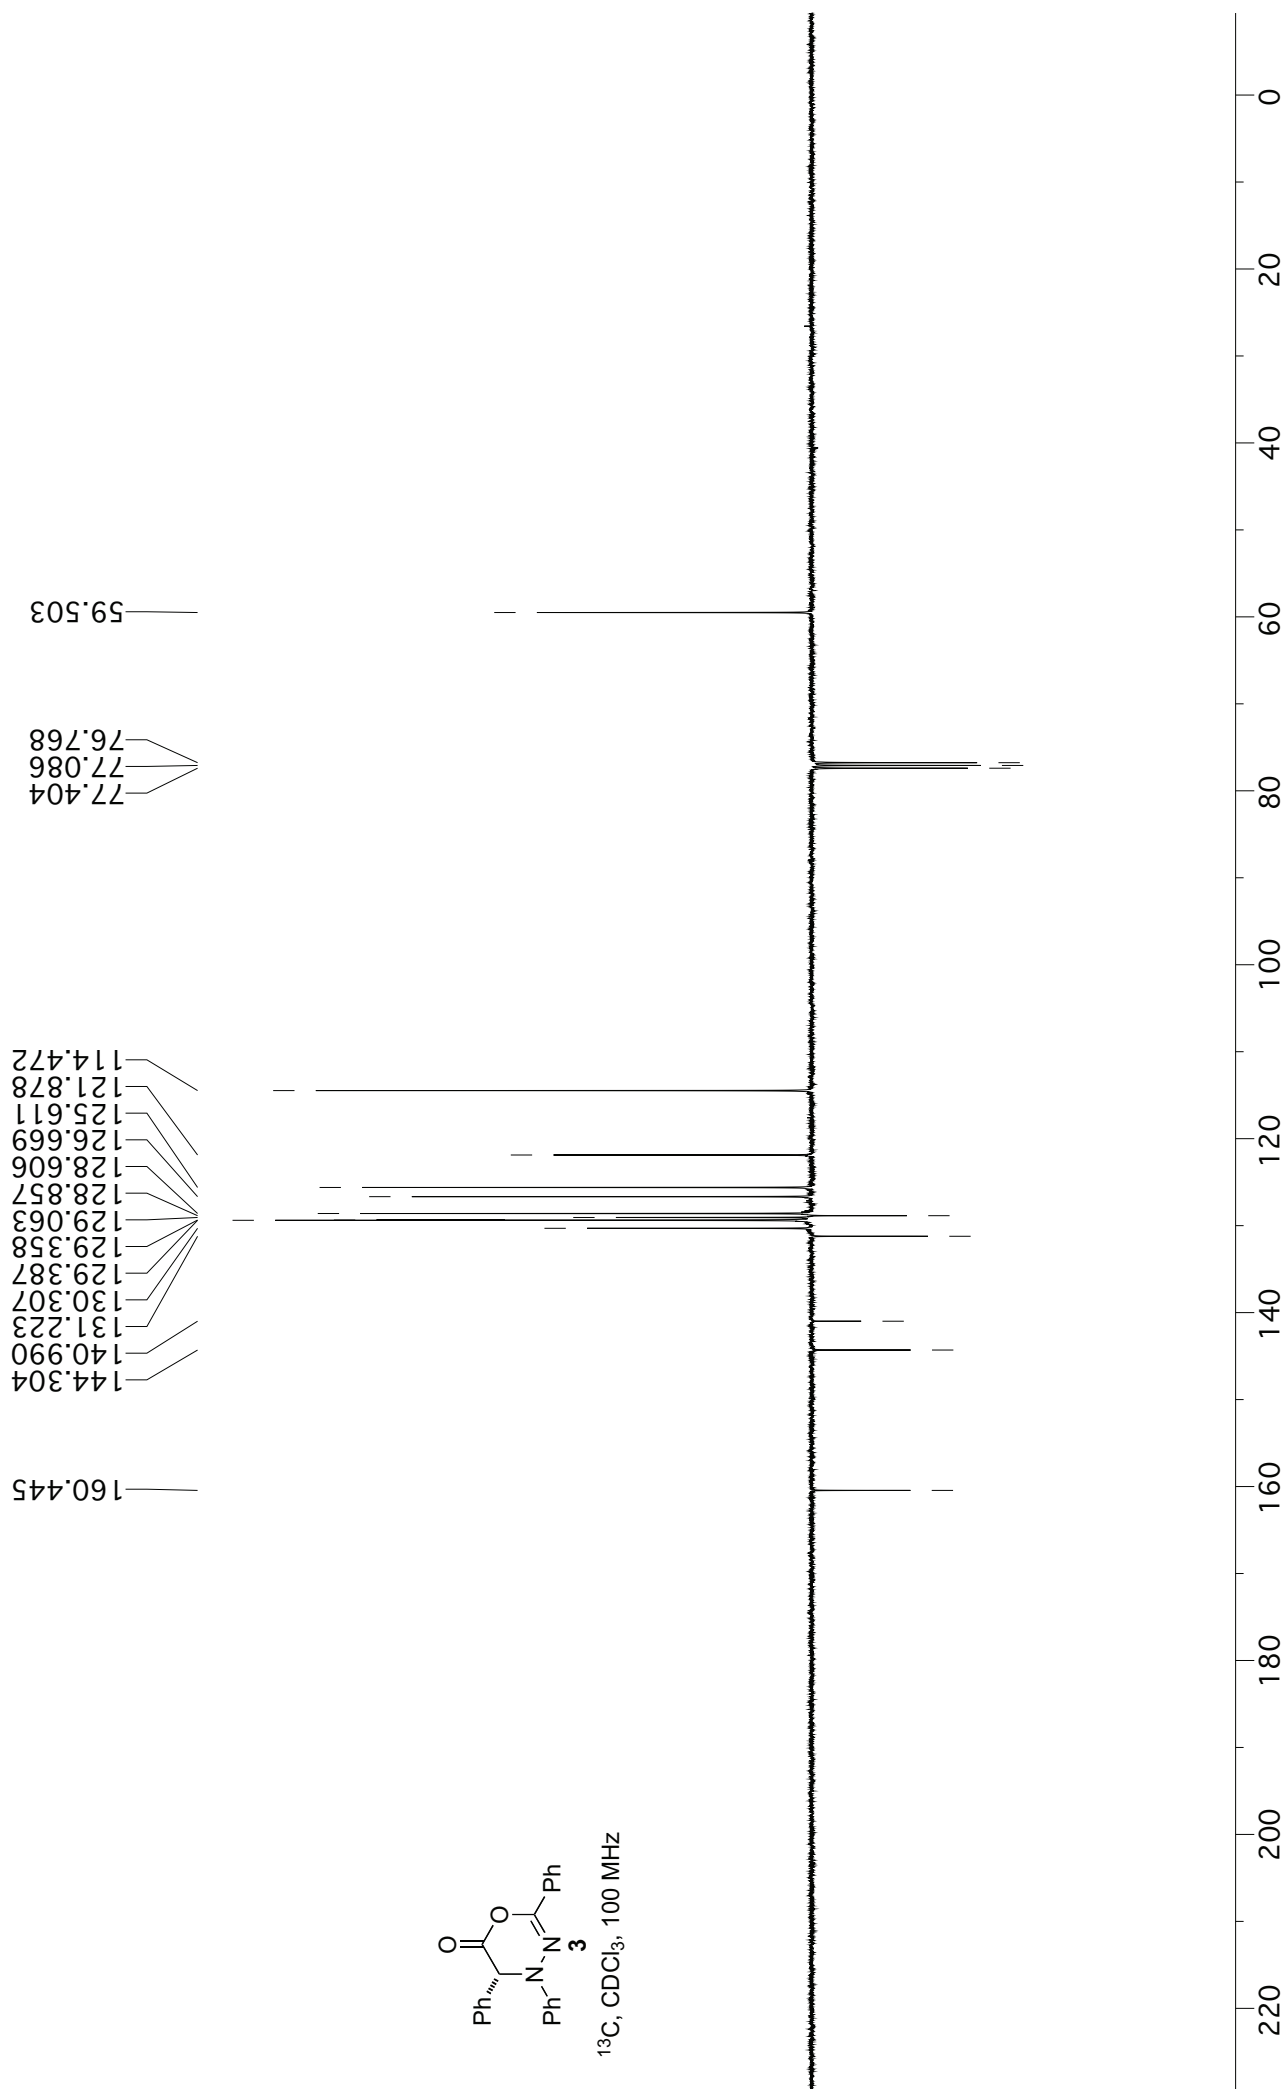

8.427  
7.902  
7.479  
7.472  
7.469  
7.464  
7.452  
7.445  
7.440  
7.420  
7.416  
7.409  
7.401  
7.391  
7.384  
7.377  
7.372  
7.367  
7.362  
7.310  
7.305  
7.289  
7.285  
7.280  
7.274  
7.271  
7.255  
7.248  
7.244  
7.240  
7.238  
7.234  
7.230  
7.225  
7.218  
7.207  
7.201  
7.180  
6.964  
6.961  
6.954  
6.938  
6.934  
6.931  
6.922  
6.908  
6.897  
6.885  
5.816  
5.500  
3.736  
3.619

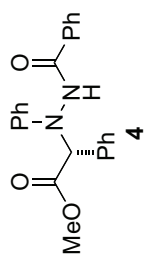

<sup>1</sup>H, CDCl<sub>3</sub>, 300 MHz

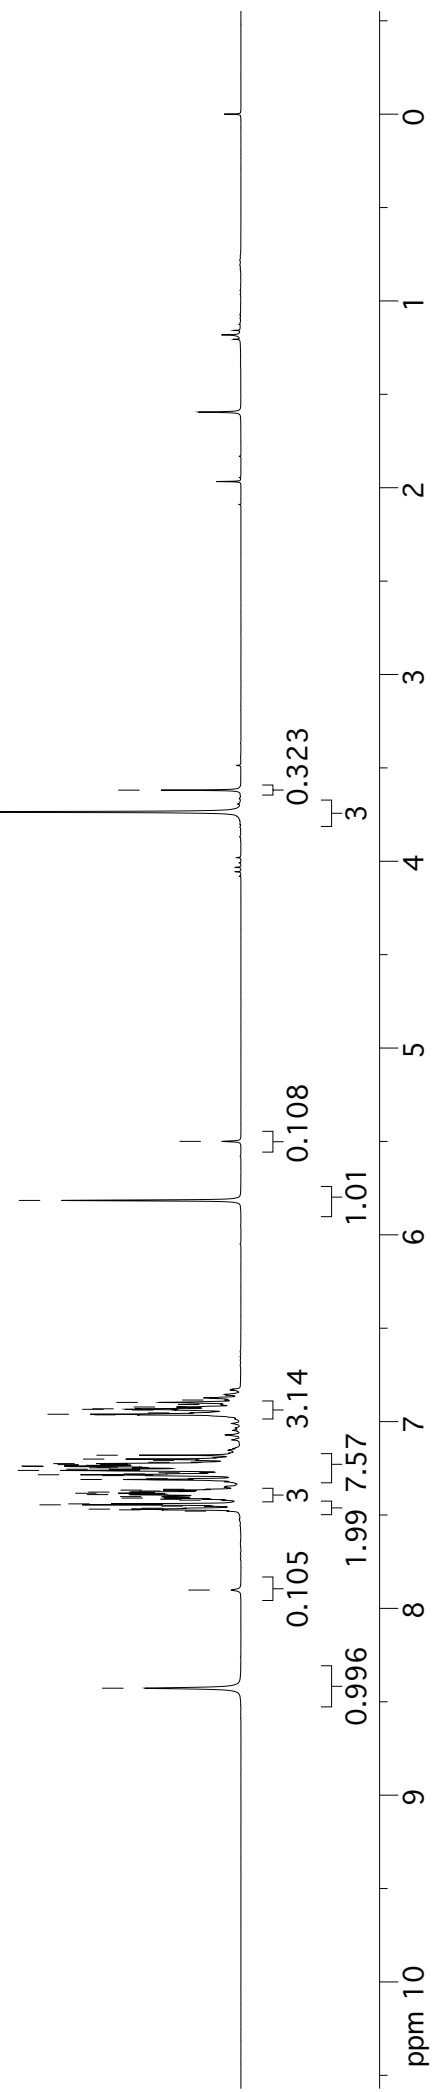





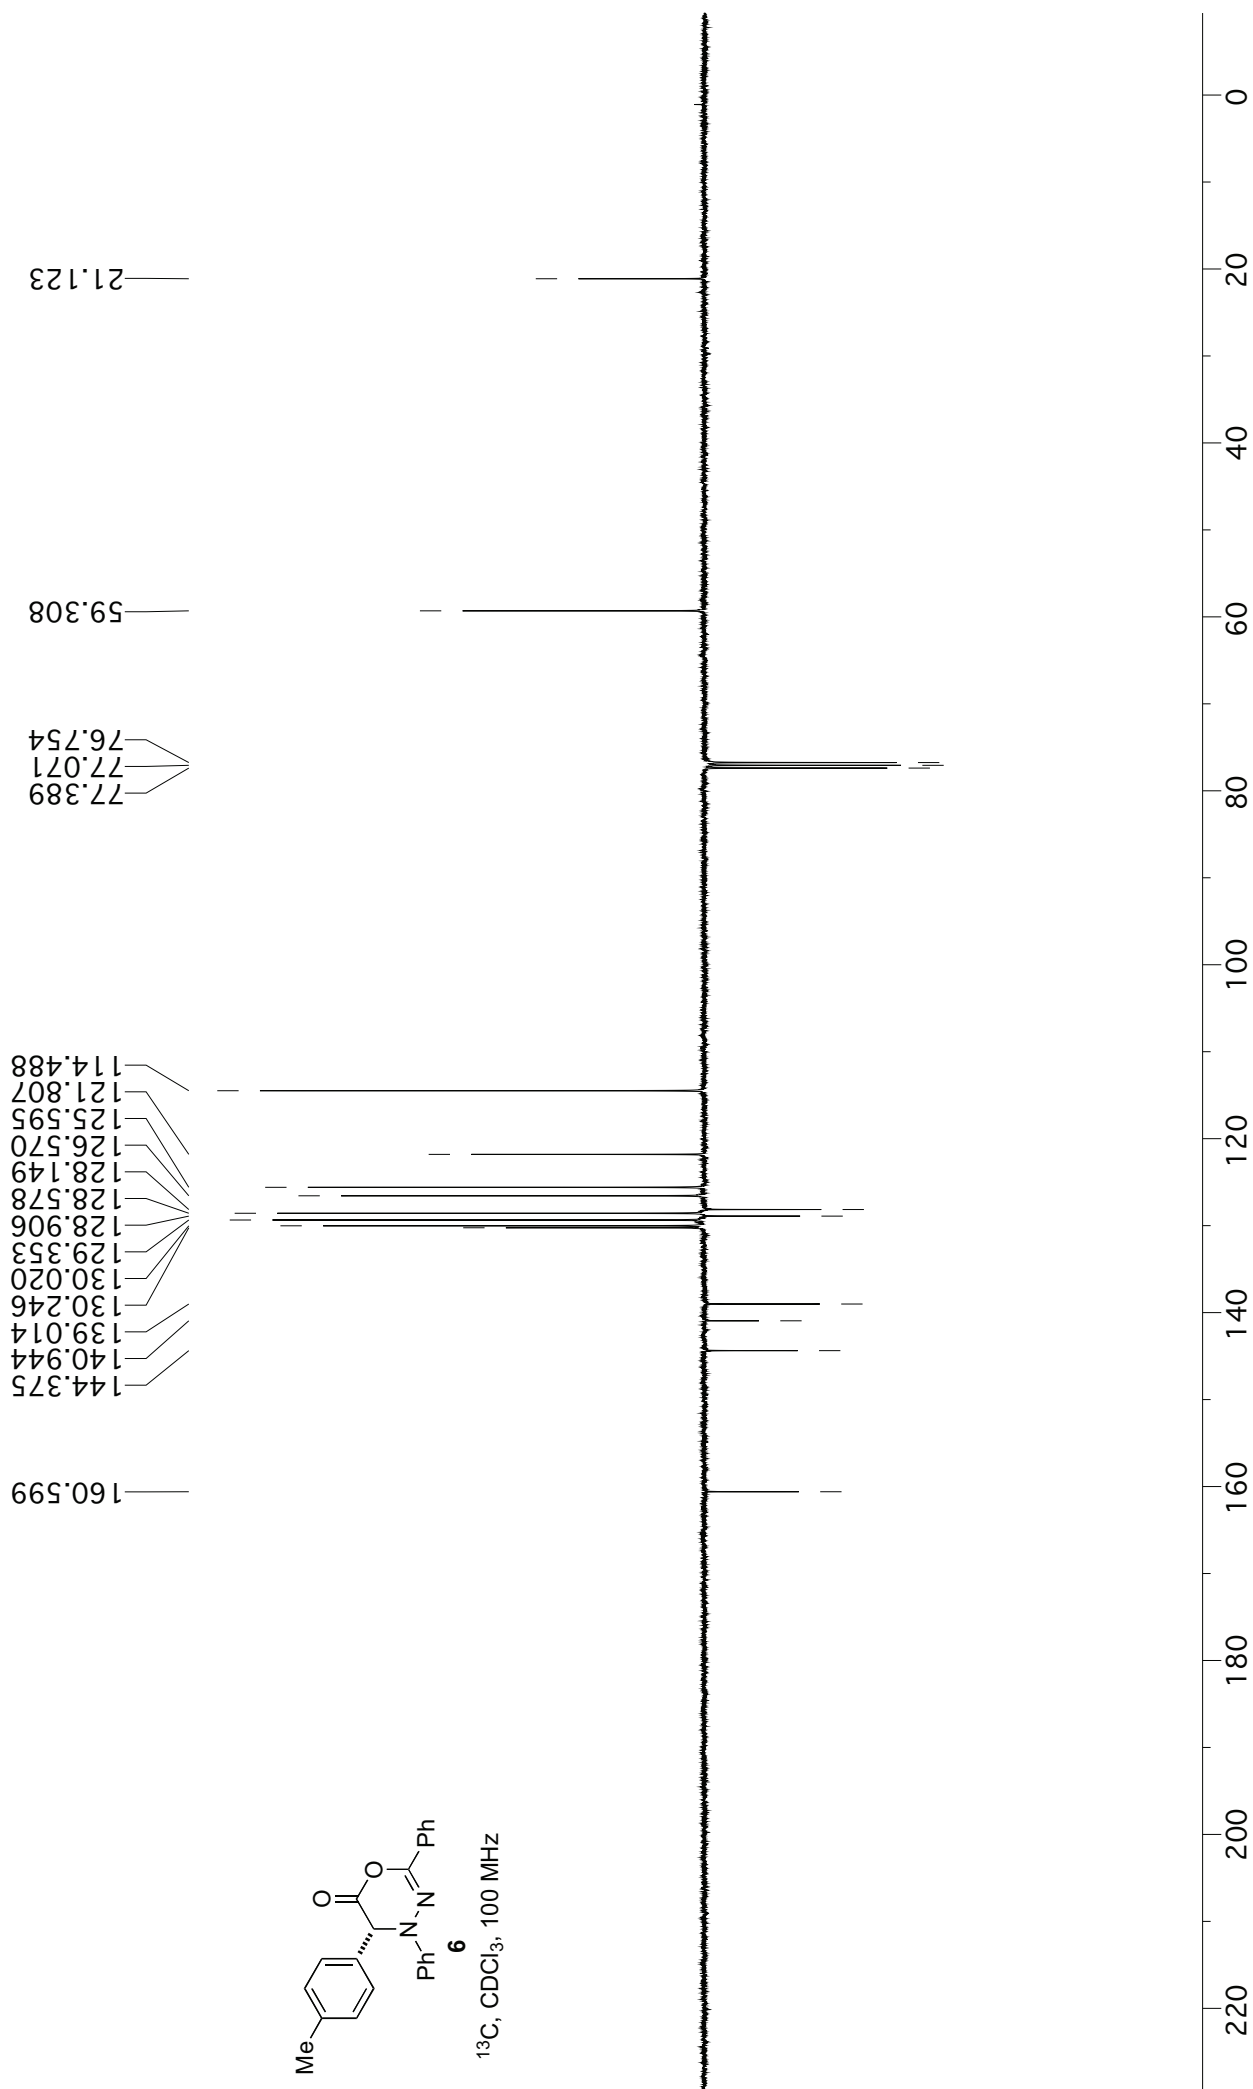



7.893  
7.886  
7.881  
7.873  
7.868  
7.864  
7.860  
7.368  
7.362  
7.354  
7.345  
7.339  
7.332  
7.327  
7.282  
7.275  
7.258  
7.252  
7.235  
7.228  
7.222  
7.178  
7.166  
7.162  
7.159  
7.137  
7.130  
6.969  
6.965  
6.962  
6.941  
6.921  
6.917  
6.914  
5.916

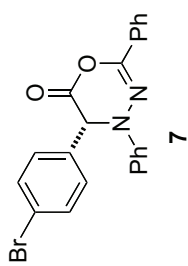

<sup>1</sup>H, CDCl<sub>3</sub>, 300 MHz

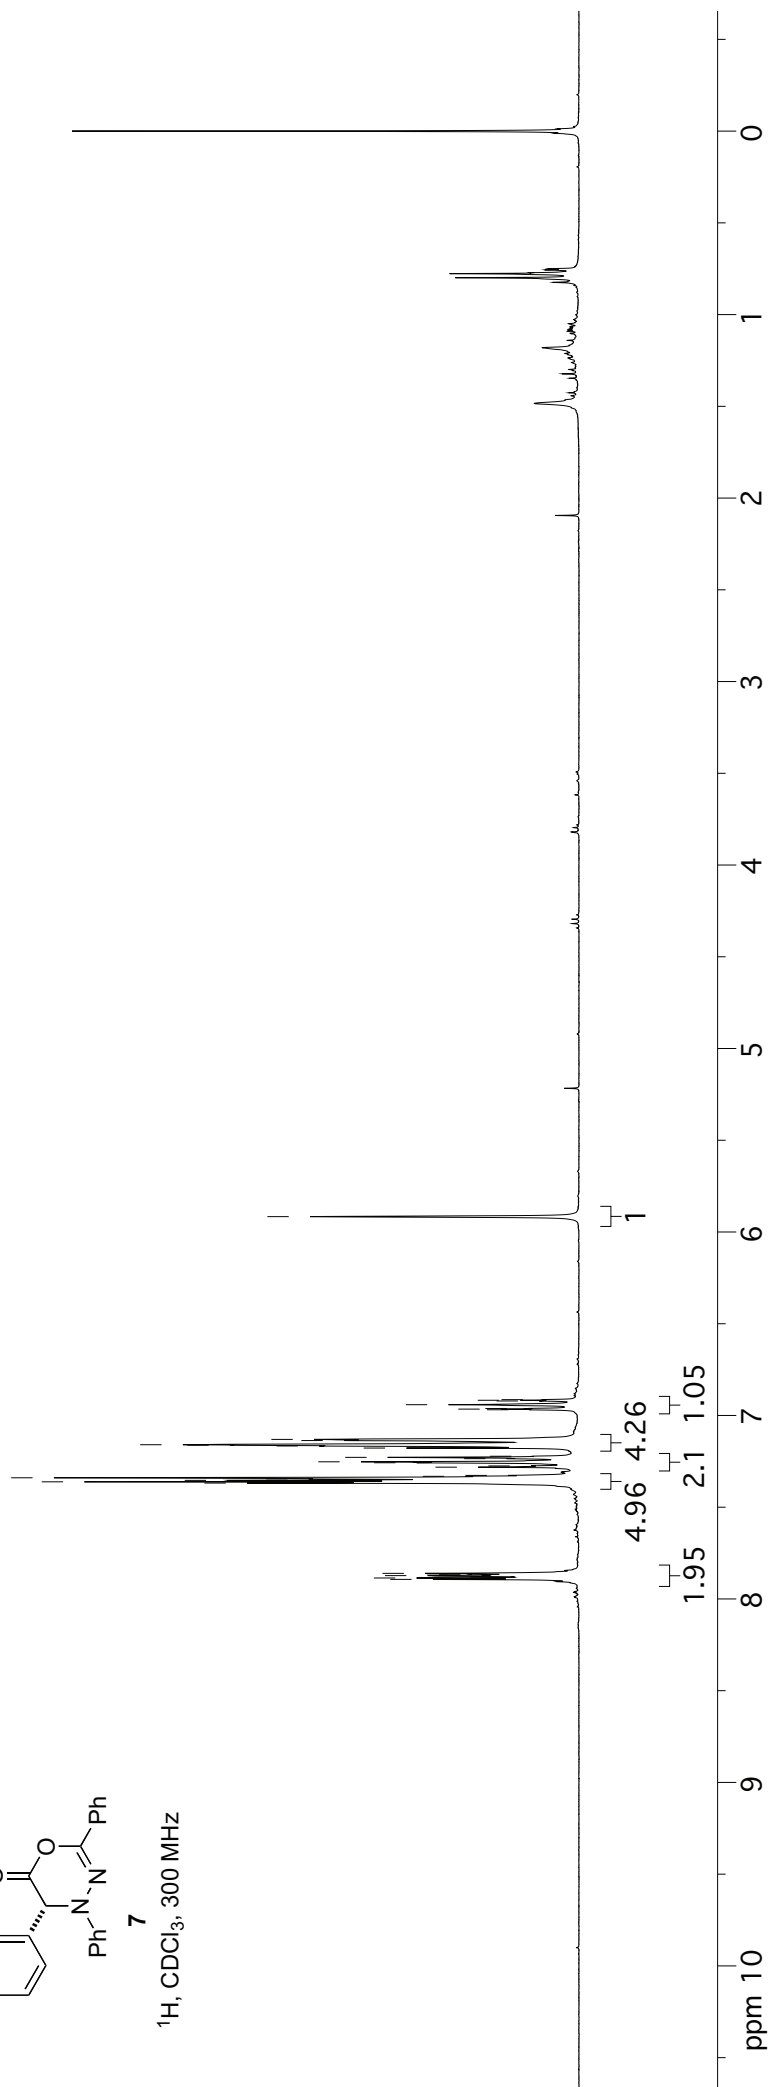

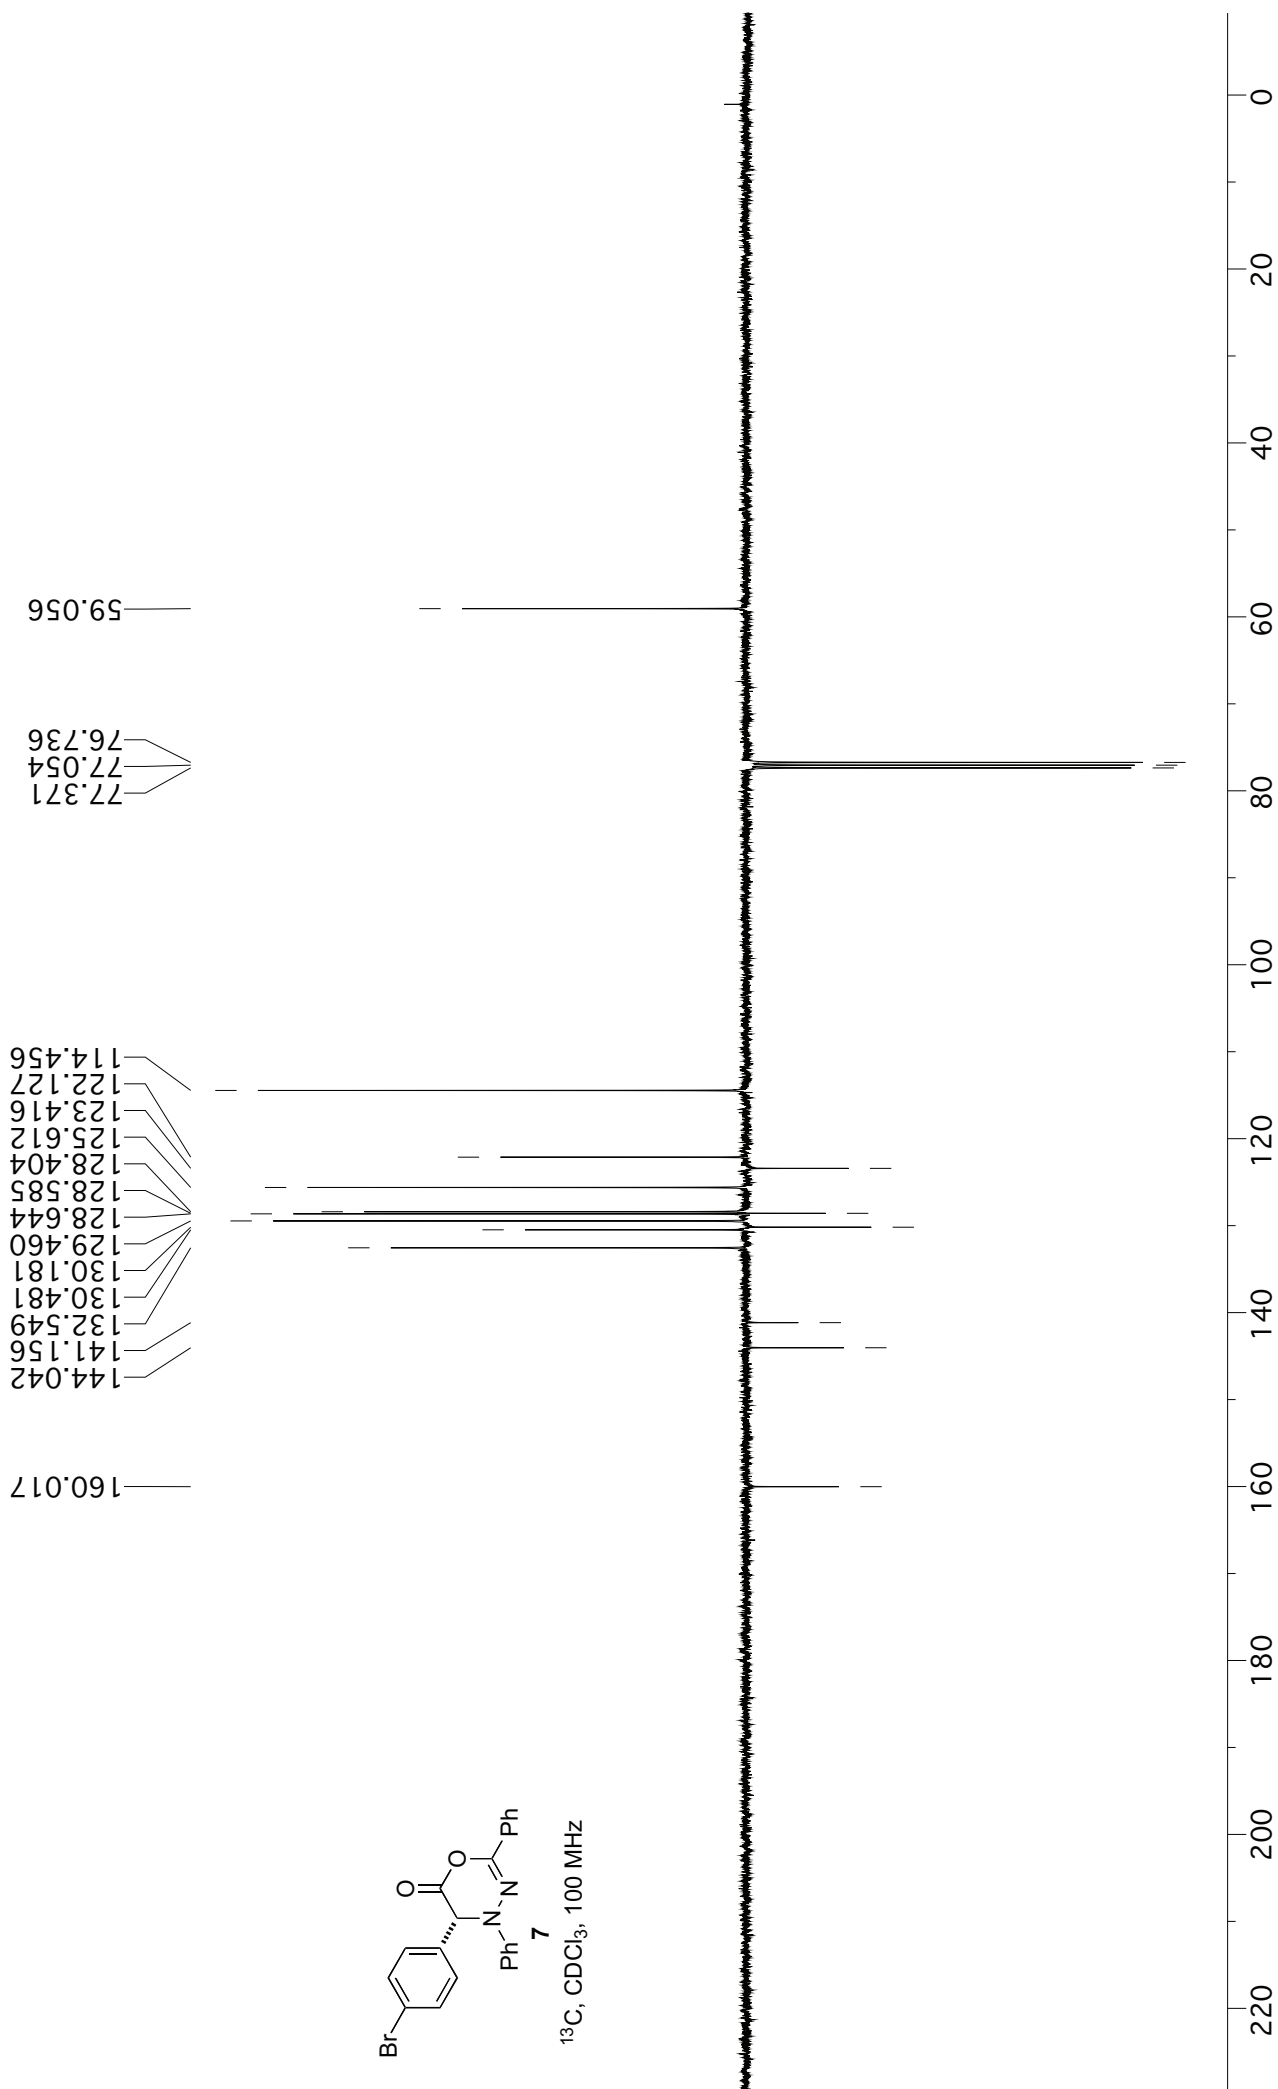



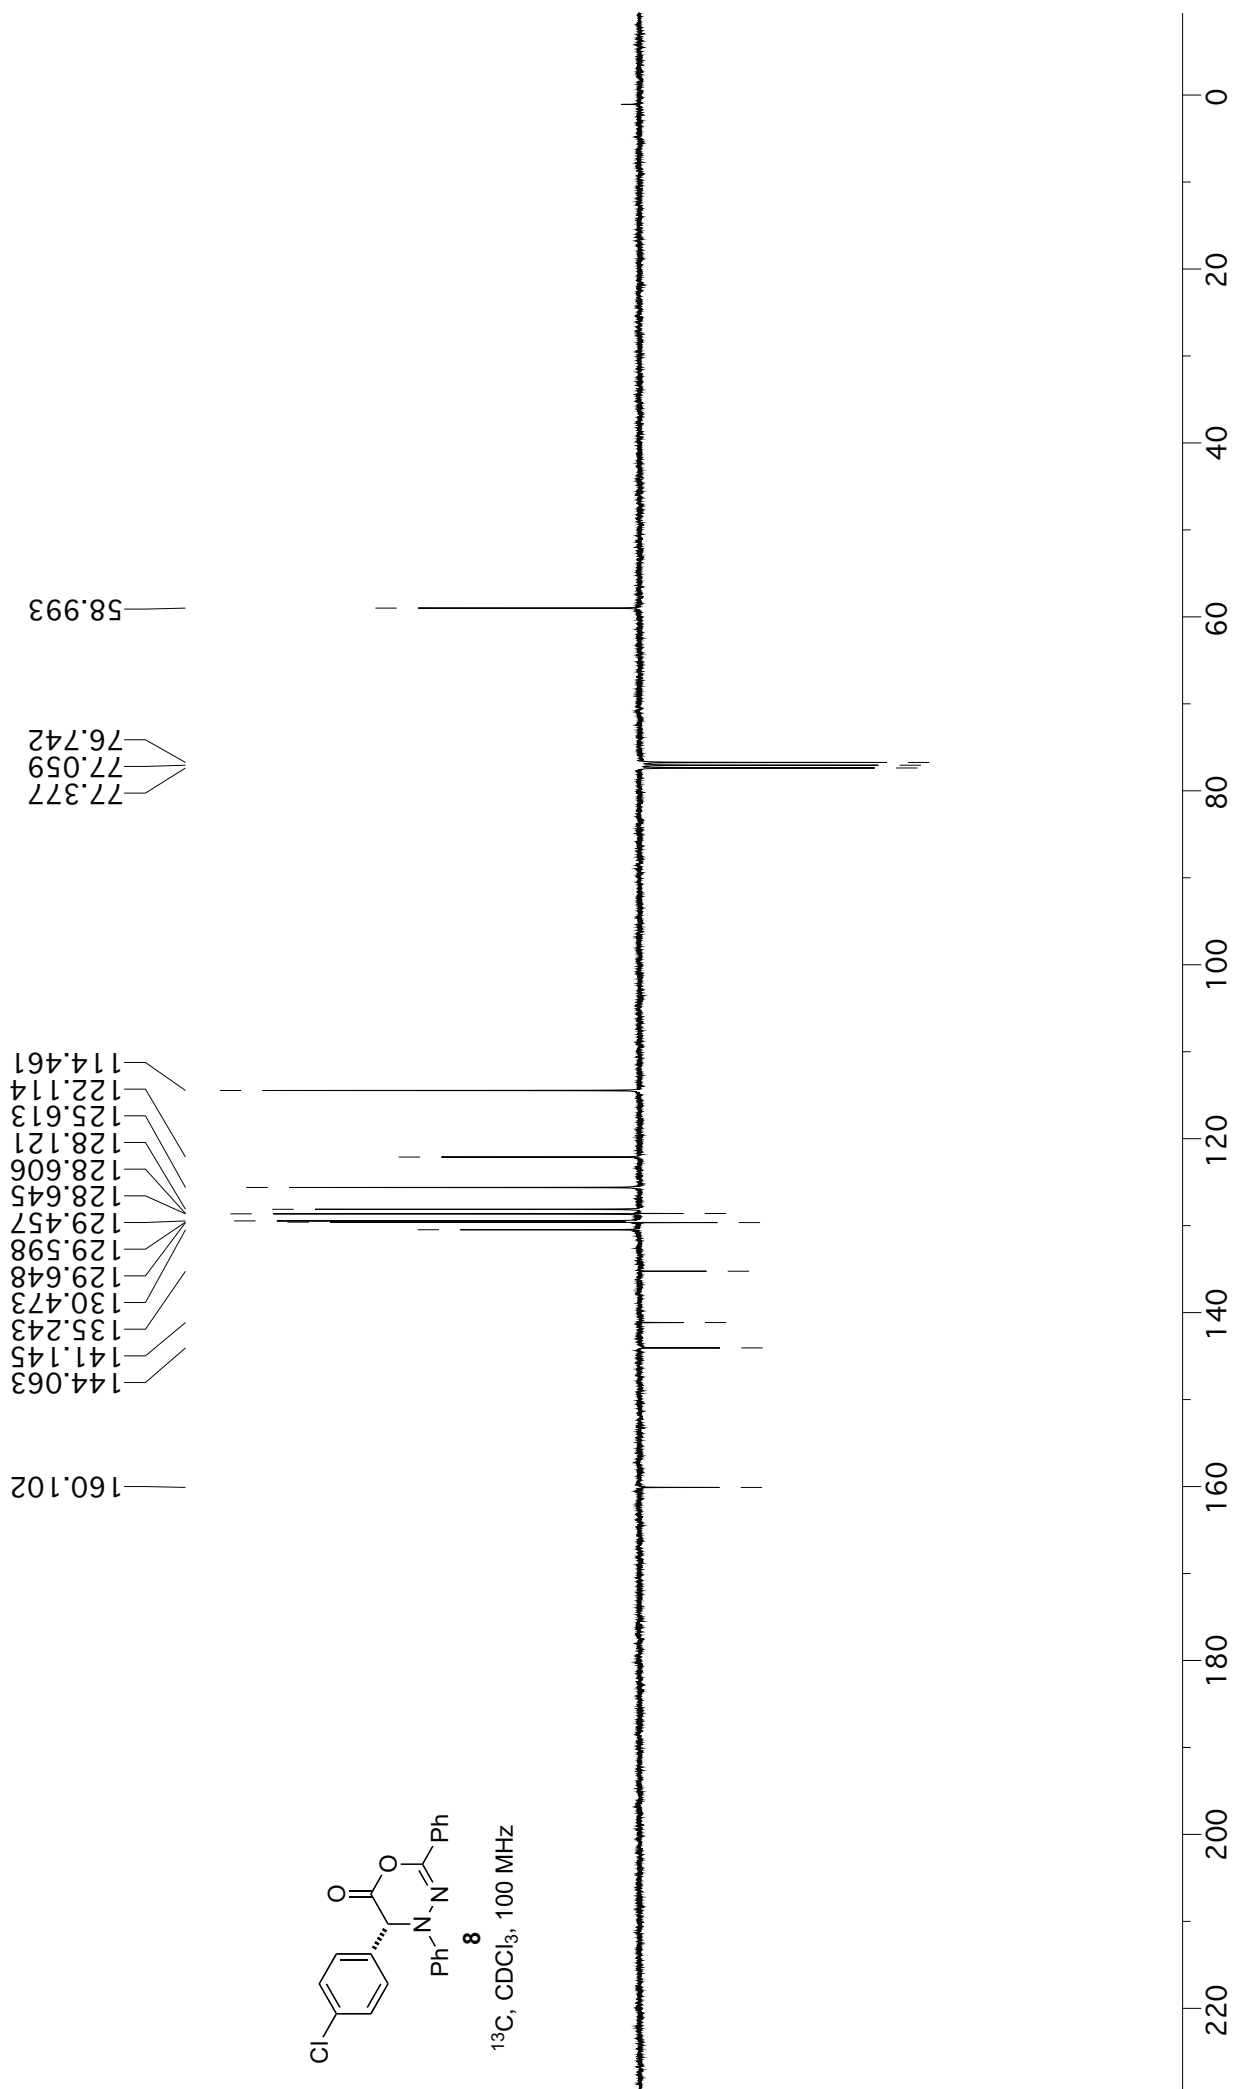

7.898  
7.892  
7.888  
7.884  
7.882  
7.879  
7.875  
7.873  
7.369  
7.360  
7.354  
7.346  
7.342  
7.337  
7.333  
7.274  
7.269  
7.264  
7.256  
7.252  
7.247  
7.243  
7.234  
7.230  
7.176  
7.174  
7.171  
7.166  
7.152  
7.149  
6.958  
6.956  
6.953  
6.938  
6.934  
6.929  
6.919  
6.917  
6.913  
6.908  
6.896  
6.891  
5.943

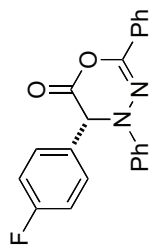

$^1\text{H}$ ,  $\text{CDCl}_3$ , 400 MHz

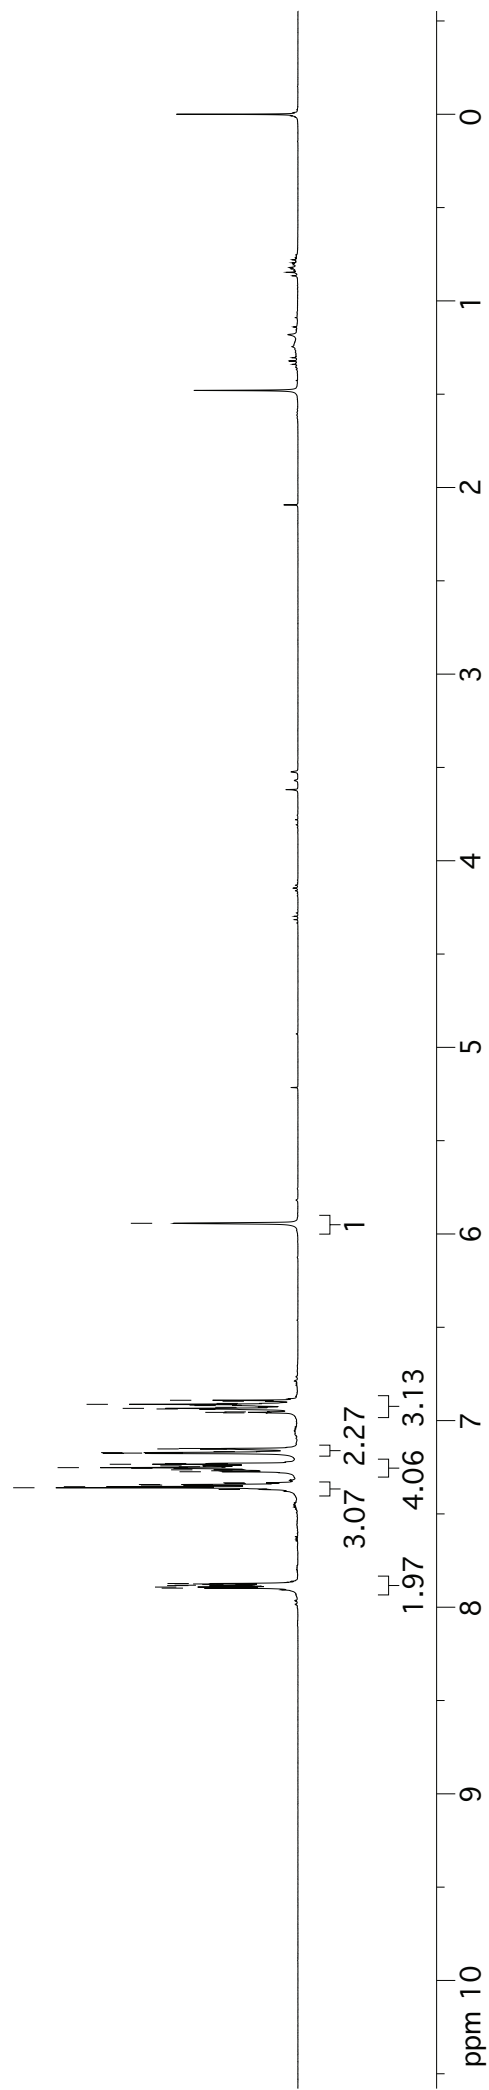

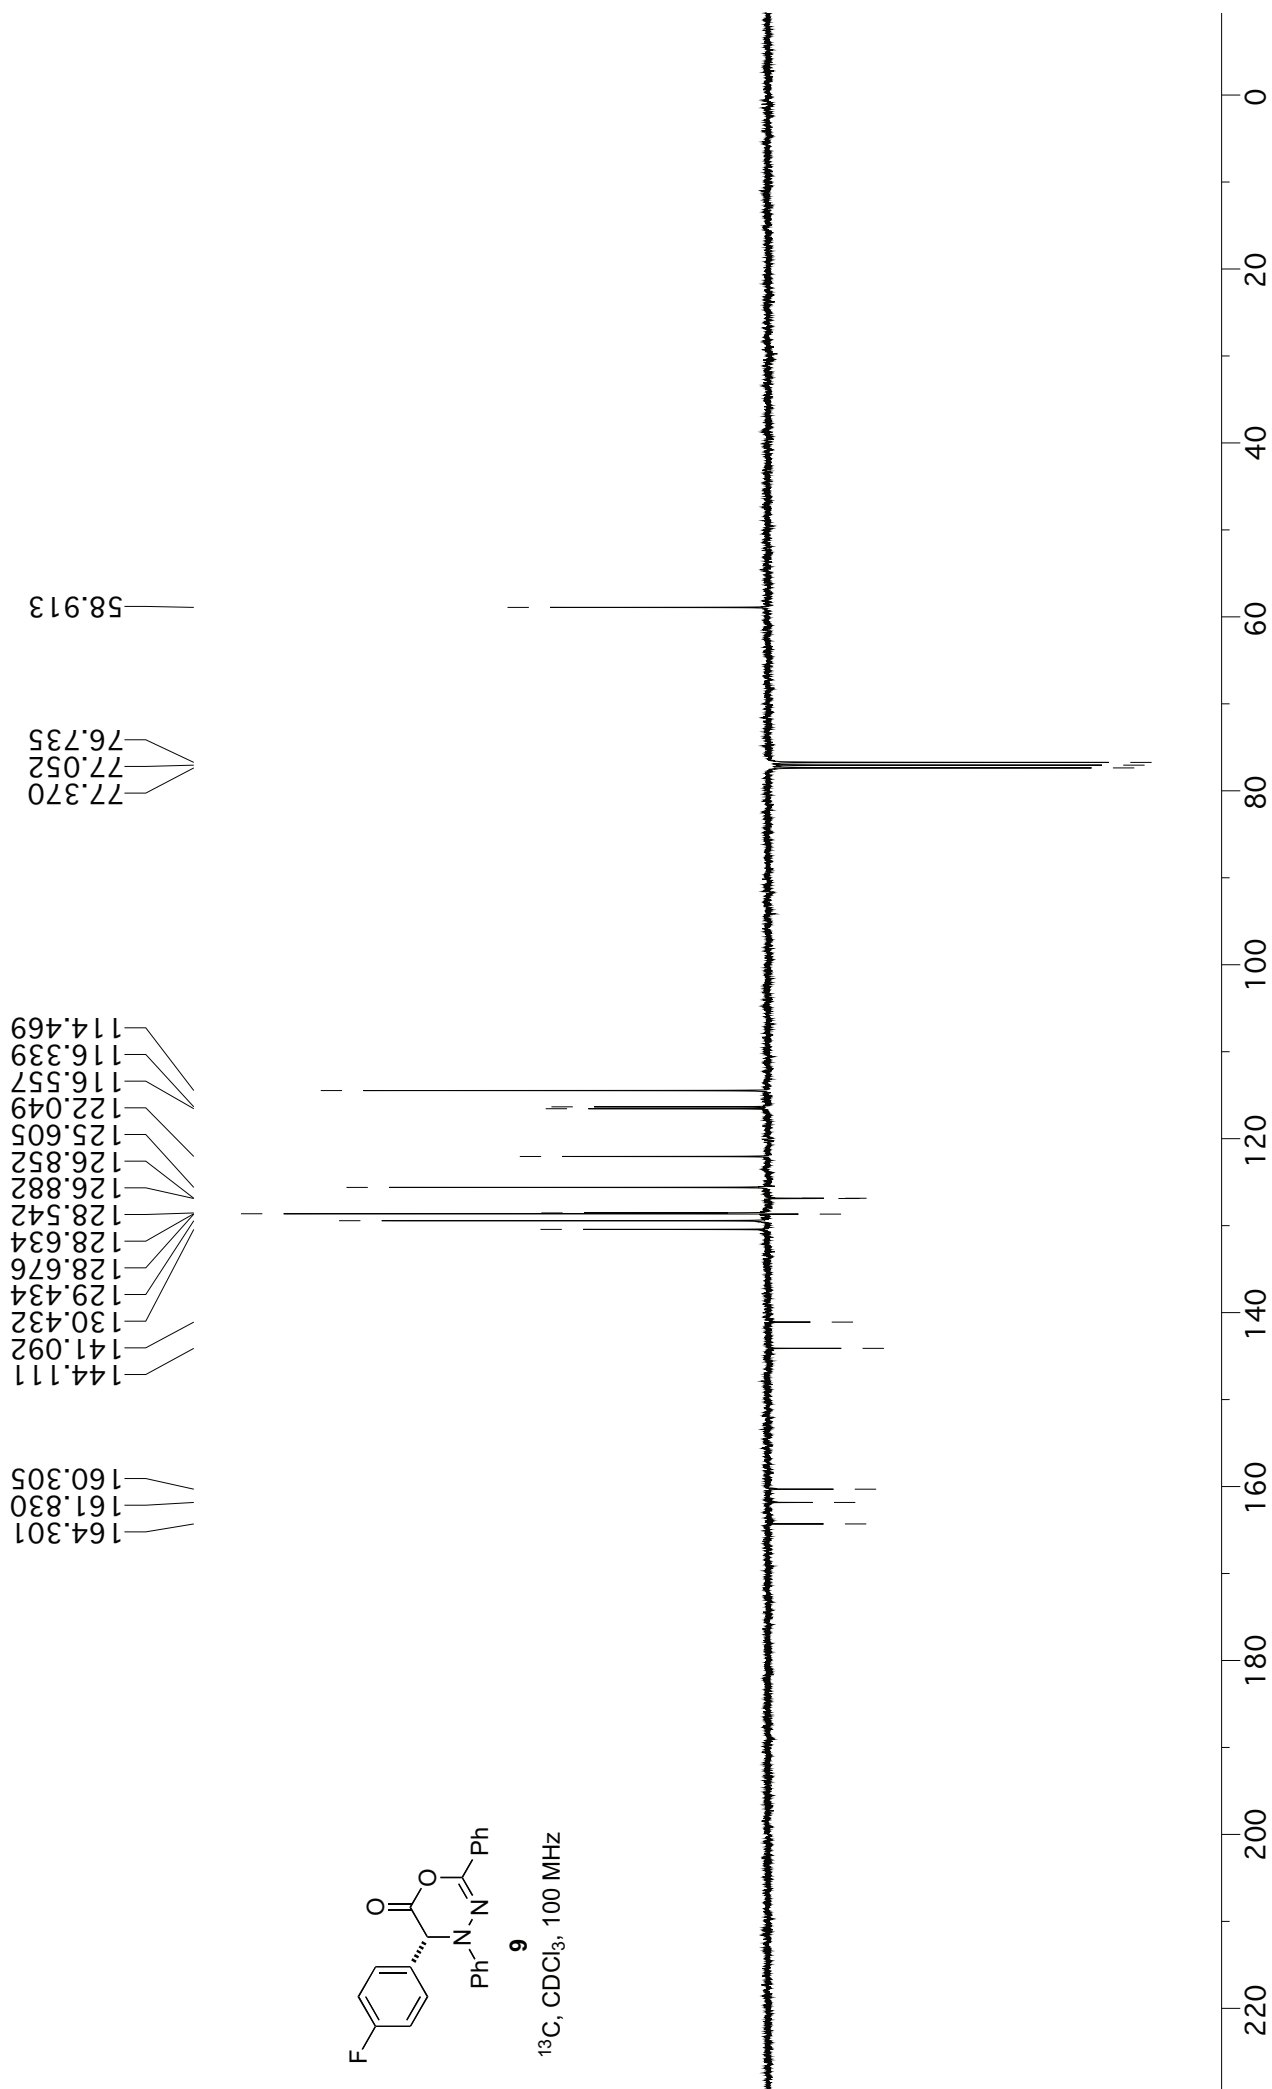



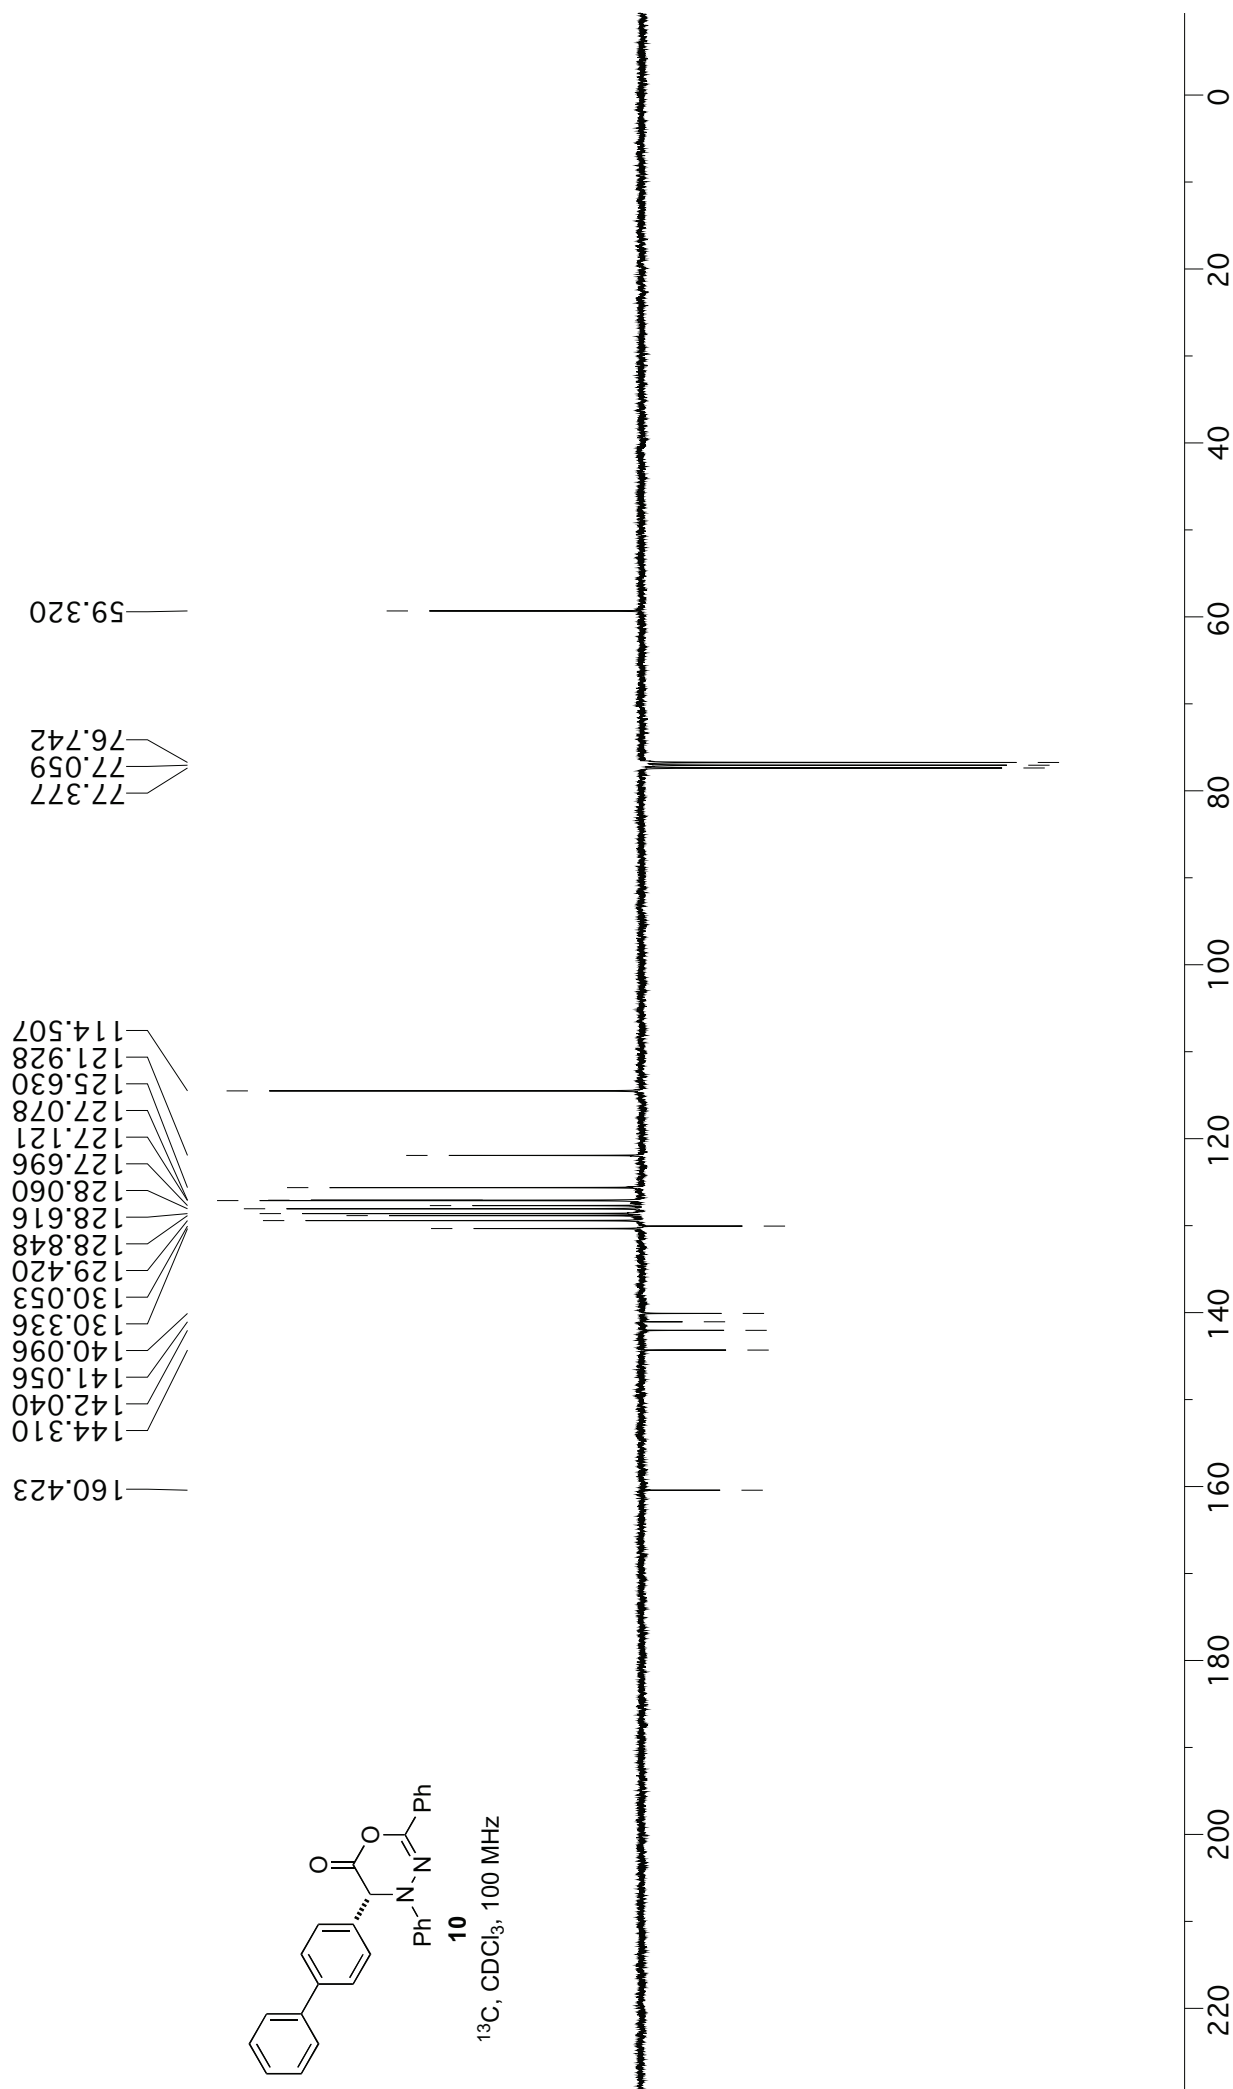



7.903  
7.899  
7.893  
7.889  
7.886  
7.882  
7.879  
7.877  
7.874  
7.872  
7.869  
7.865  
7.858  
7.847  
7.841  
7.837  
7.833  
7.832  
7.829  
7.826  
7.824  
7.821  
7.818  
7.815  
7.811  
7.811  
7.810  
7.093  
7.075  
7.056  
7.026  
7.010  
6.992  
6.929  
6.926  
6.923  
6.911  
6.908  
6.906  
6.893  
6.890  
6.887  
5.912  
2.194

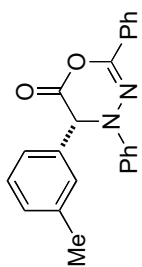

<sup>1</sup>H, CDCl<sub>3</sub>, 400 MHz

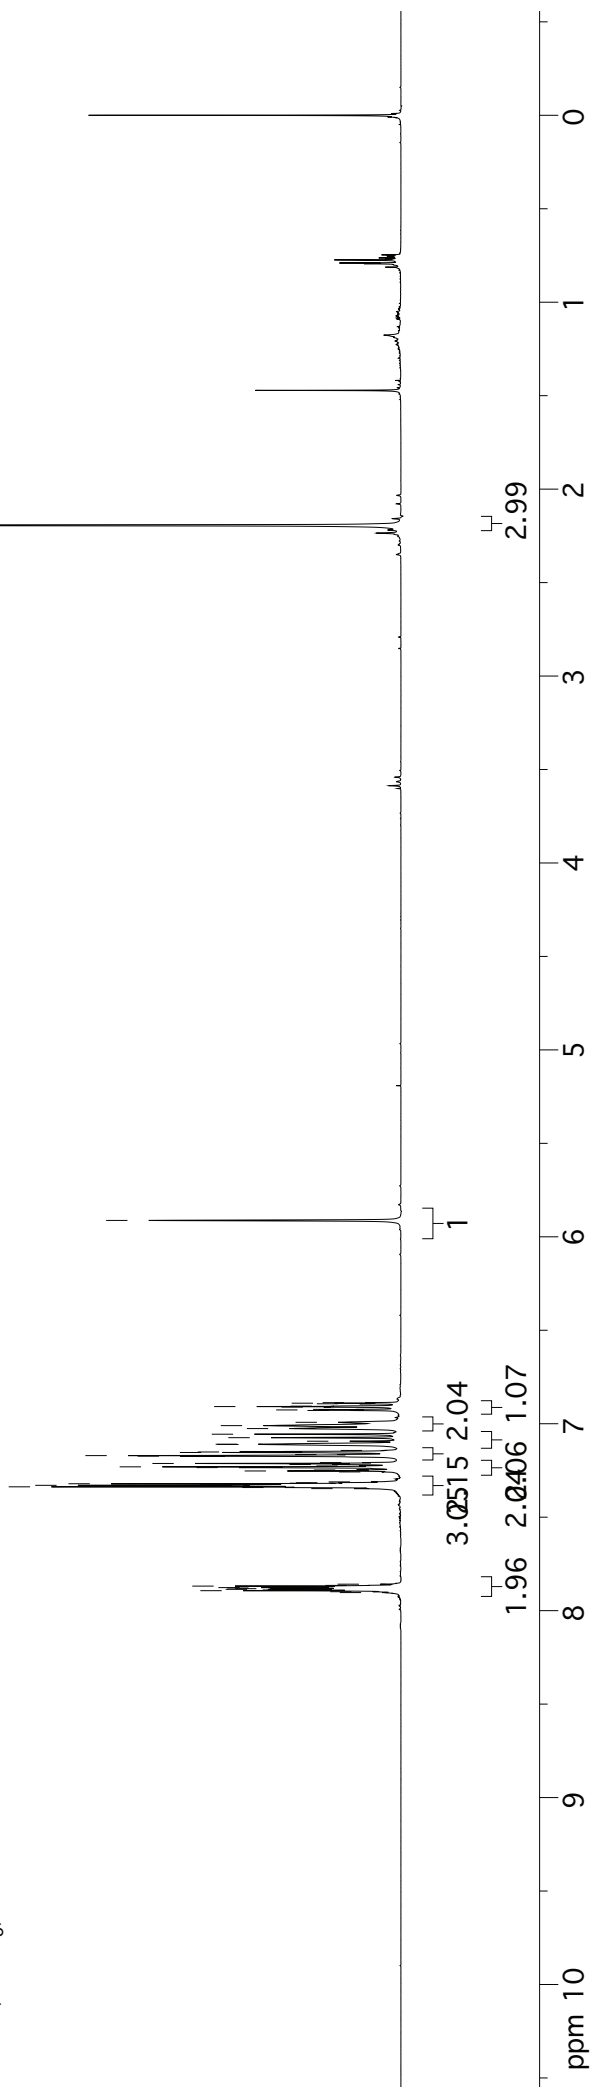

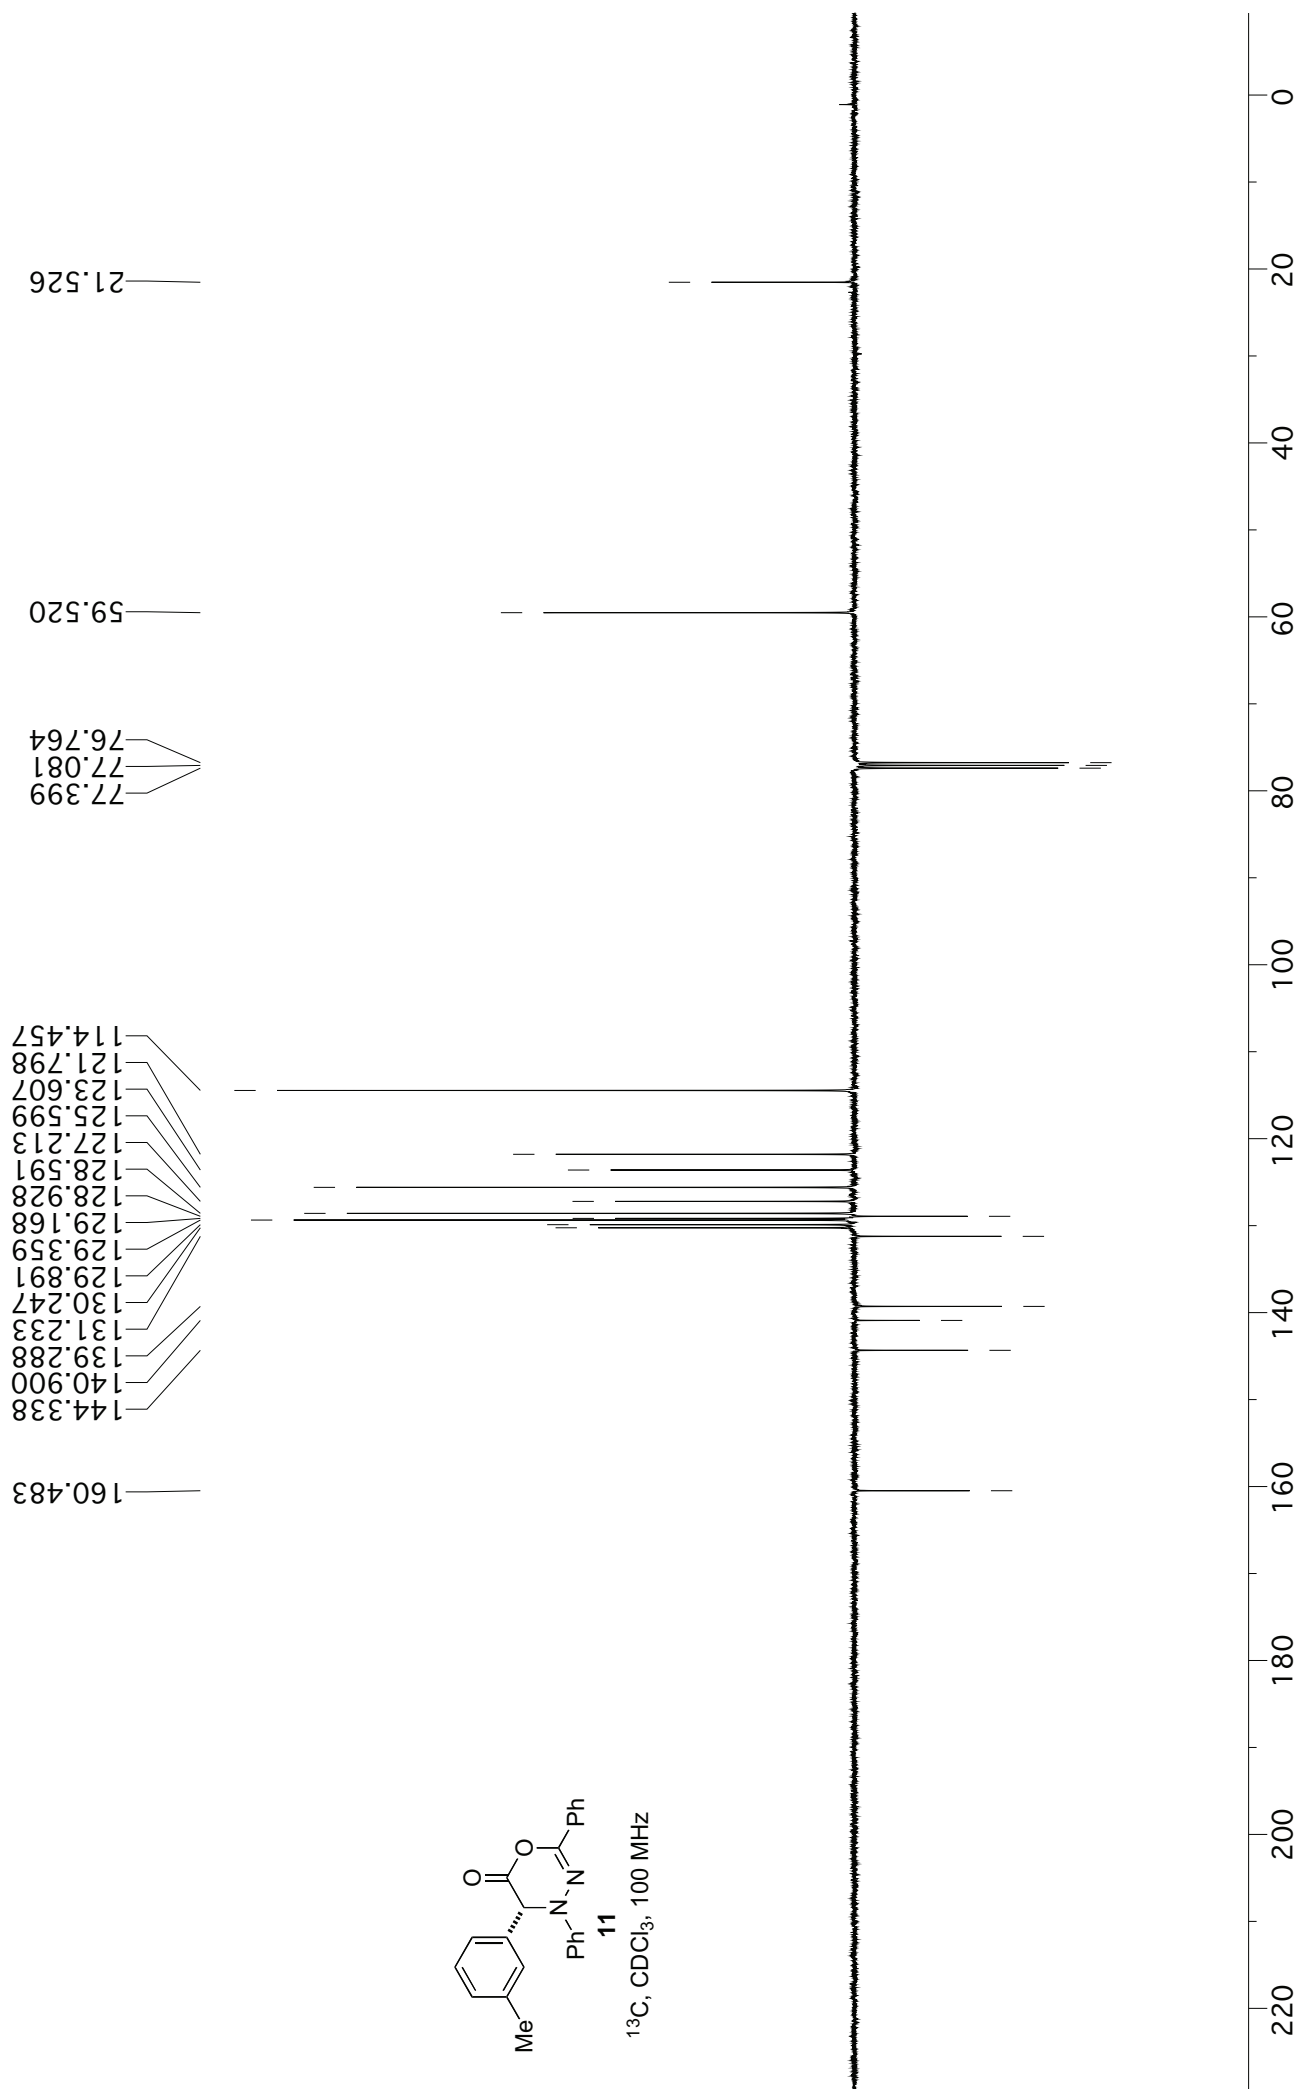

7.912  
7.908  
7.904  
7.901  
7.897  
7.895  
7.893  
7.890  
7.887  
7.883  
7.743  
7.721  
7.710  
7.704  
7.699  
7.688  
7.668  
7.659  
7.651  
7.645  
7.422  
7.417  
7.401  
7.397  
7.385  
7.380  
7.377  
7.369  
7.360  
7.358  
7.353  
7.346  
7.341  
7.336  
7.334  
7.331  
7.328  
7.325  
7.322  
7.320  
7.266  
7.263  
7.260  
7.250  
7.243  
7.227  
7.225  
7.216  
7.213  
7.210  
7.207  
7.204  
6.945  
6.940  
6.934  
6.929  
6.924  
6.920  
6.914  
6.908  
6.903  
6.122

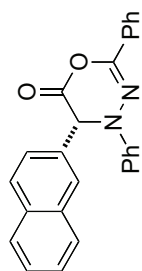

<sup>1</sup>H, CDCl<sub>3</sub>, 400 MHz

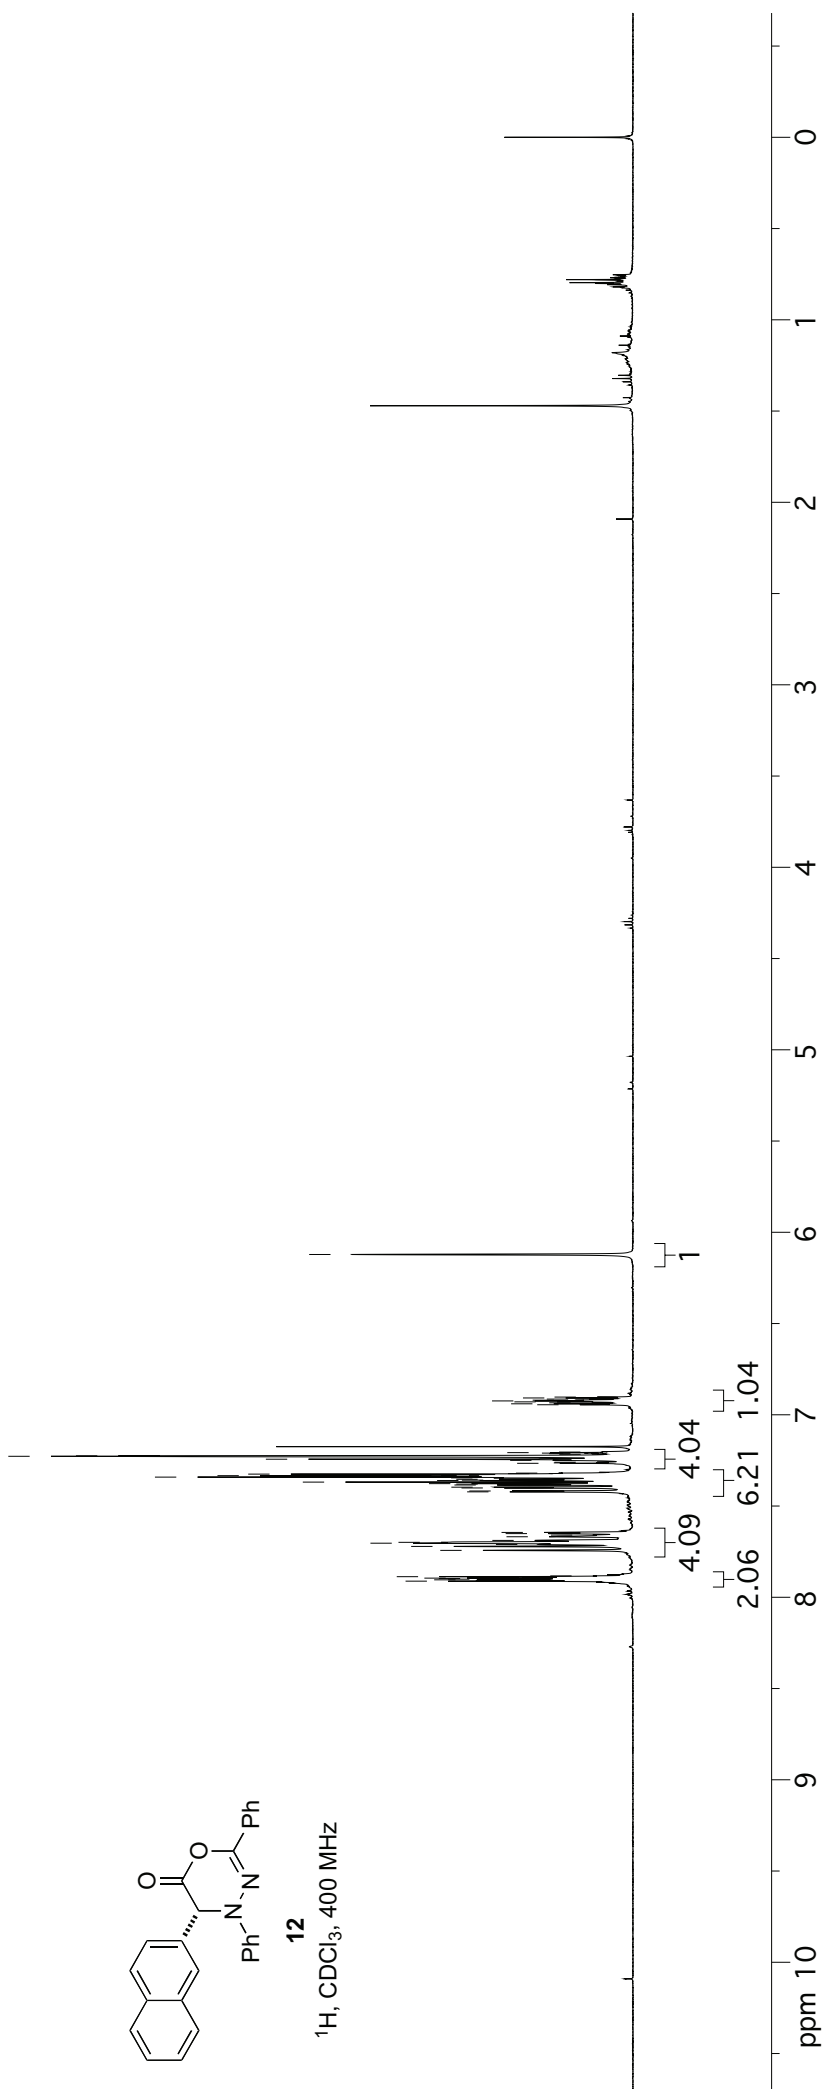

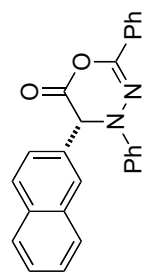

$^{13}\text{C}$ ,  $\text{CDCl}_3$ , 100 MHz

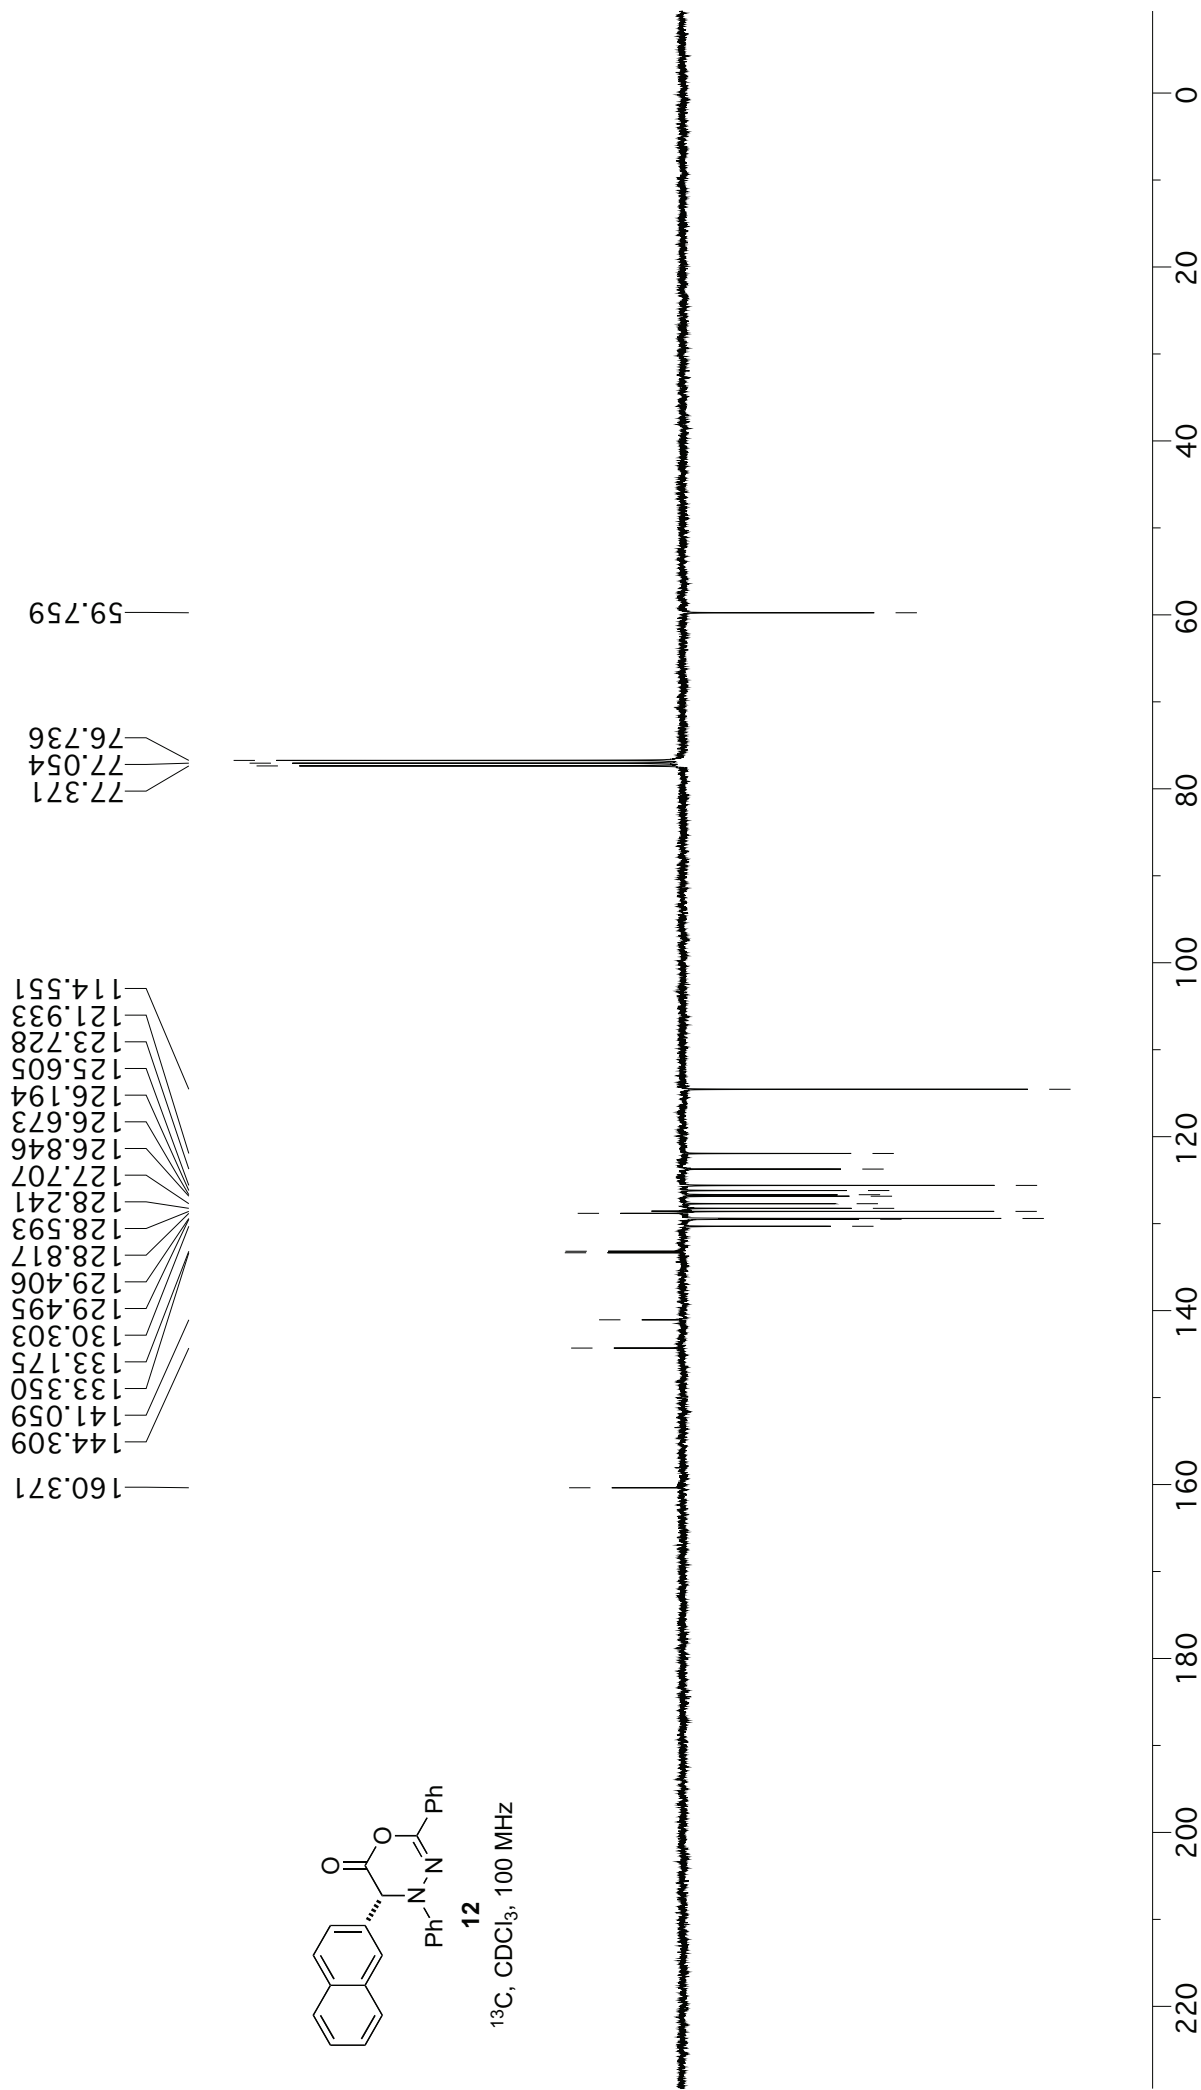

7.873  
7.868  
7.858  
7.854  
7.849  
7.848  
7.838  
7.832  
7.824  
7.821  
7.816  
7.812  
7.755  
7.750  
7.745  
7.741  
7.728  
7.720  
7.720  
7.210  
7.200  
7.116  
7.110  
7.105  
7.099  
7.093  
7.087  
7.082  
6.945  
6.939  
6.934  
6.925  
6.907  
6.902  
5.875

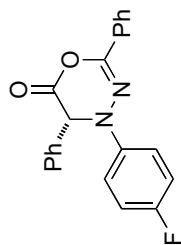

<sup>1</sup>H, CDCl<sub>3</sub>, 400 MHz

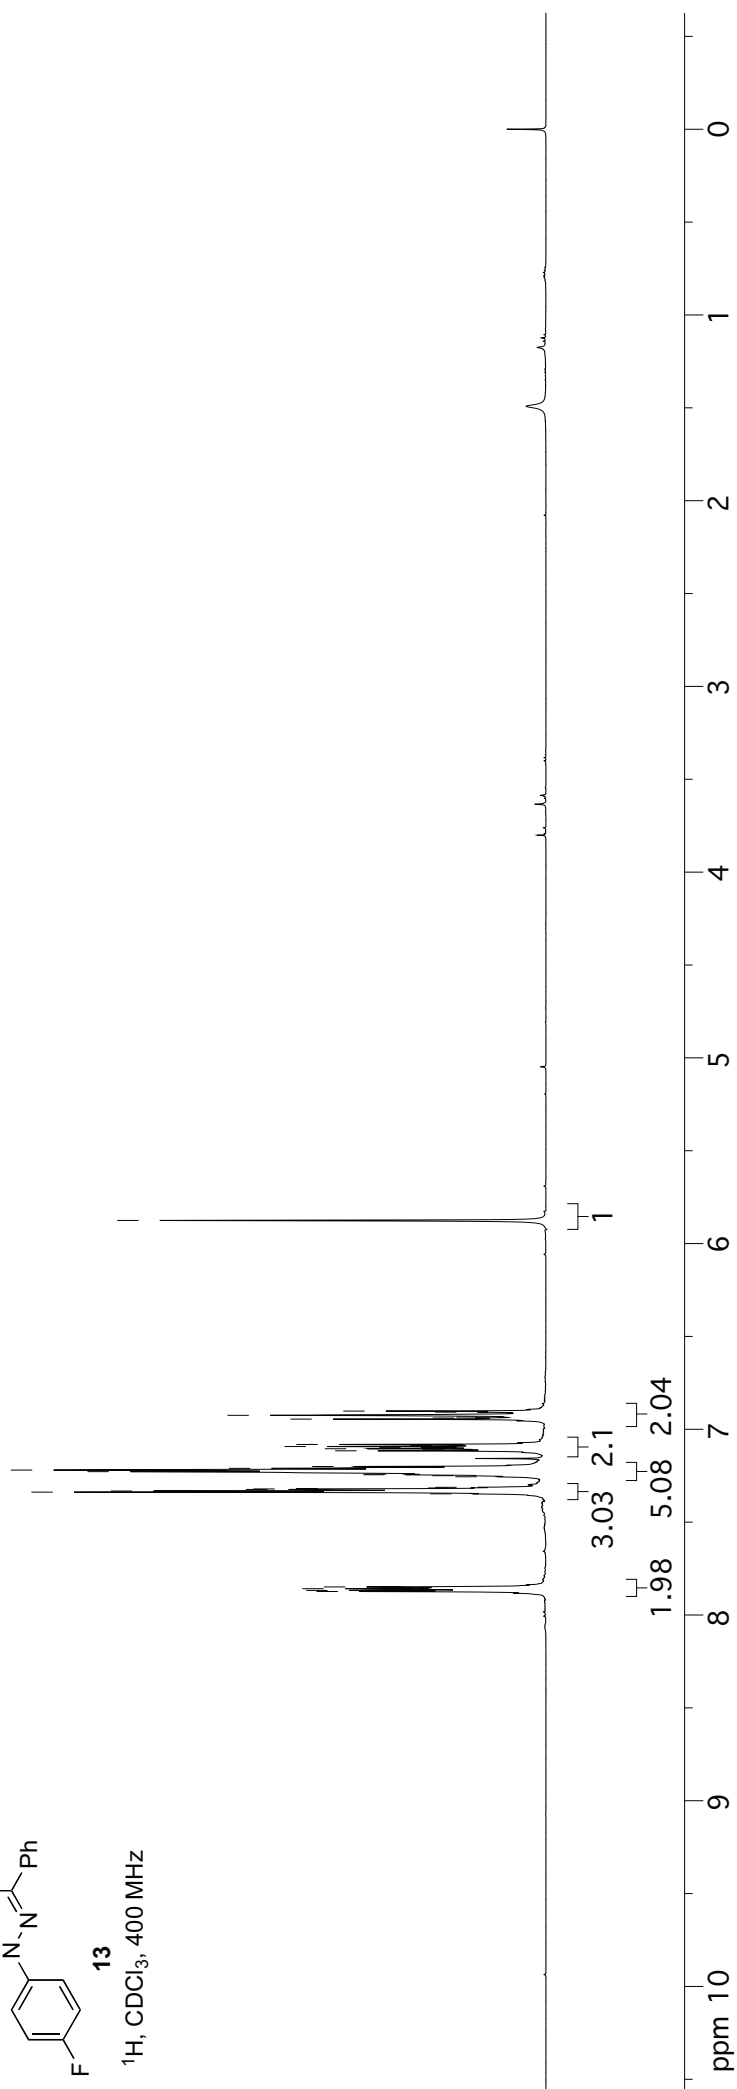

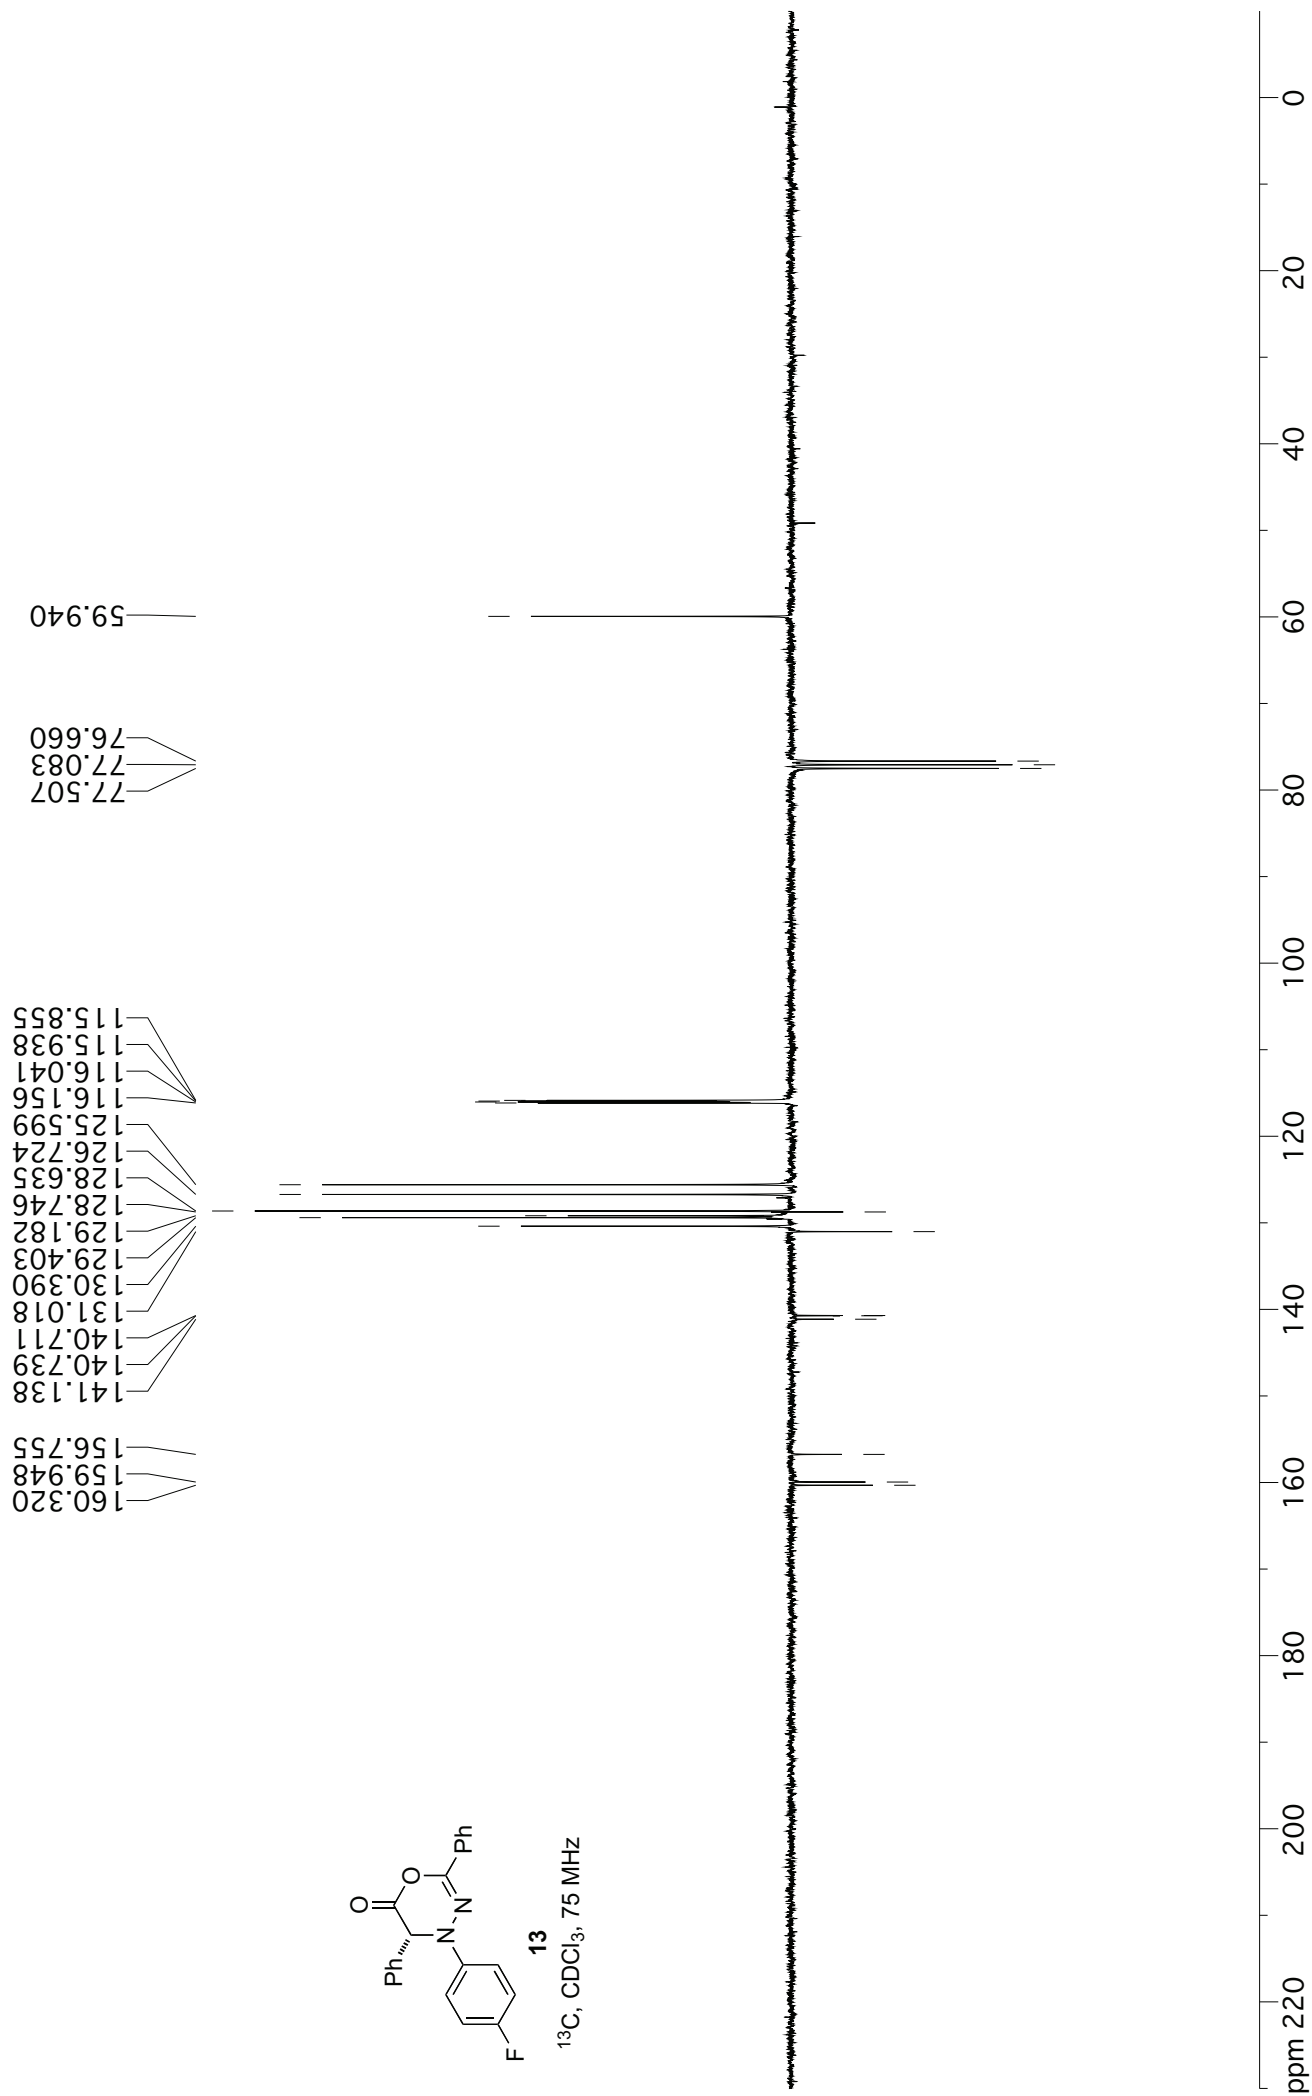

7.894  
7.884  
7.877  
7.866  
7.861  
7.843  
7.836  
7.826  
7.278  
7.270  
7.262  
7.256  
7.248  
7.239  
7.233  
7.226  
7.224  
7.222  
7.212  
7.209  
7.201  
7.165  
7.161  
7.154  
7.135  
7.132  
7.042  
7.035  
7.019  
7.014  
7.007  
6.991  
6.984  
6.944  
6.940  
6.936  
6.916  
6.897  
6.892  
6.888  
5.955

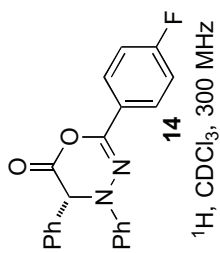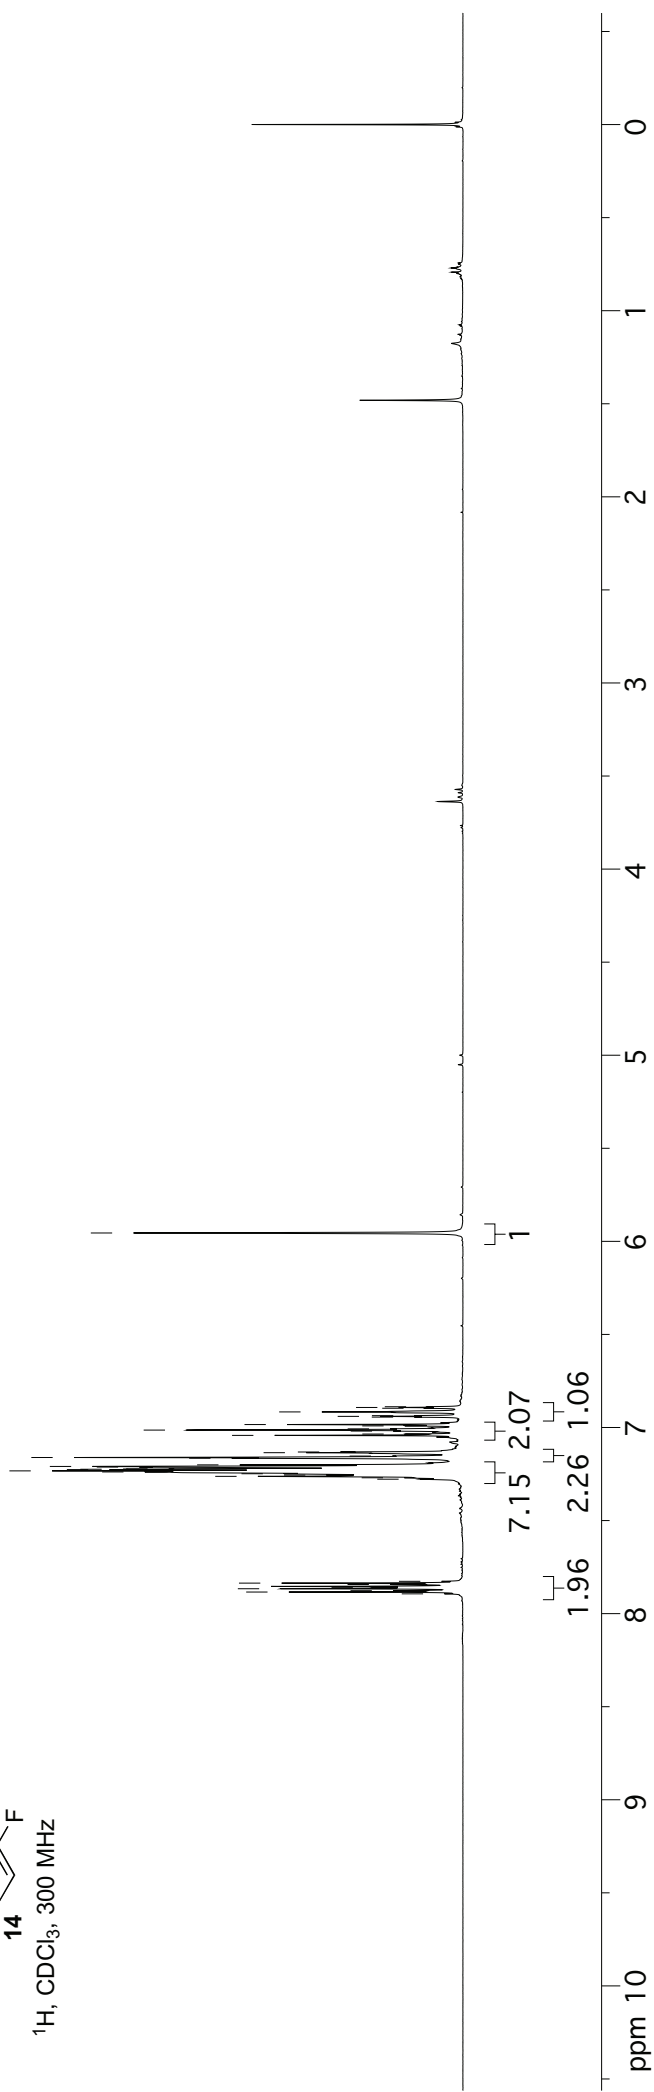

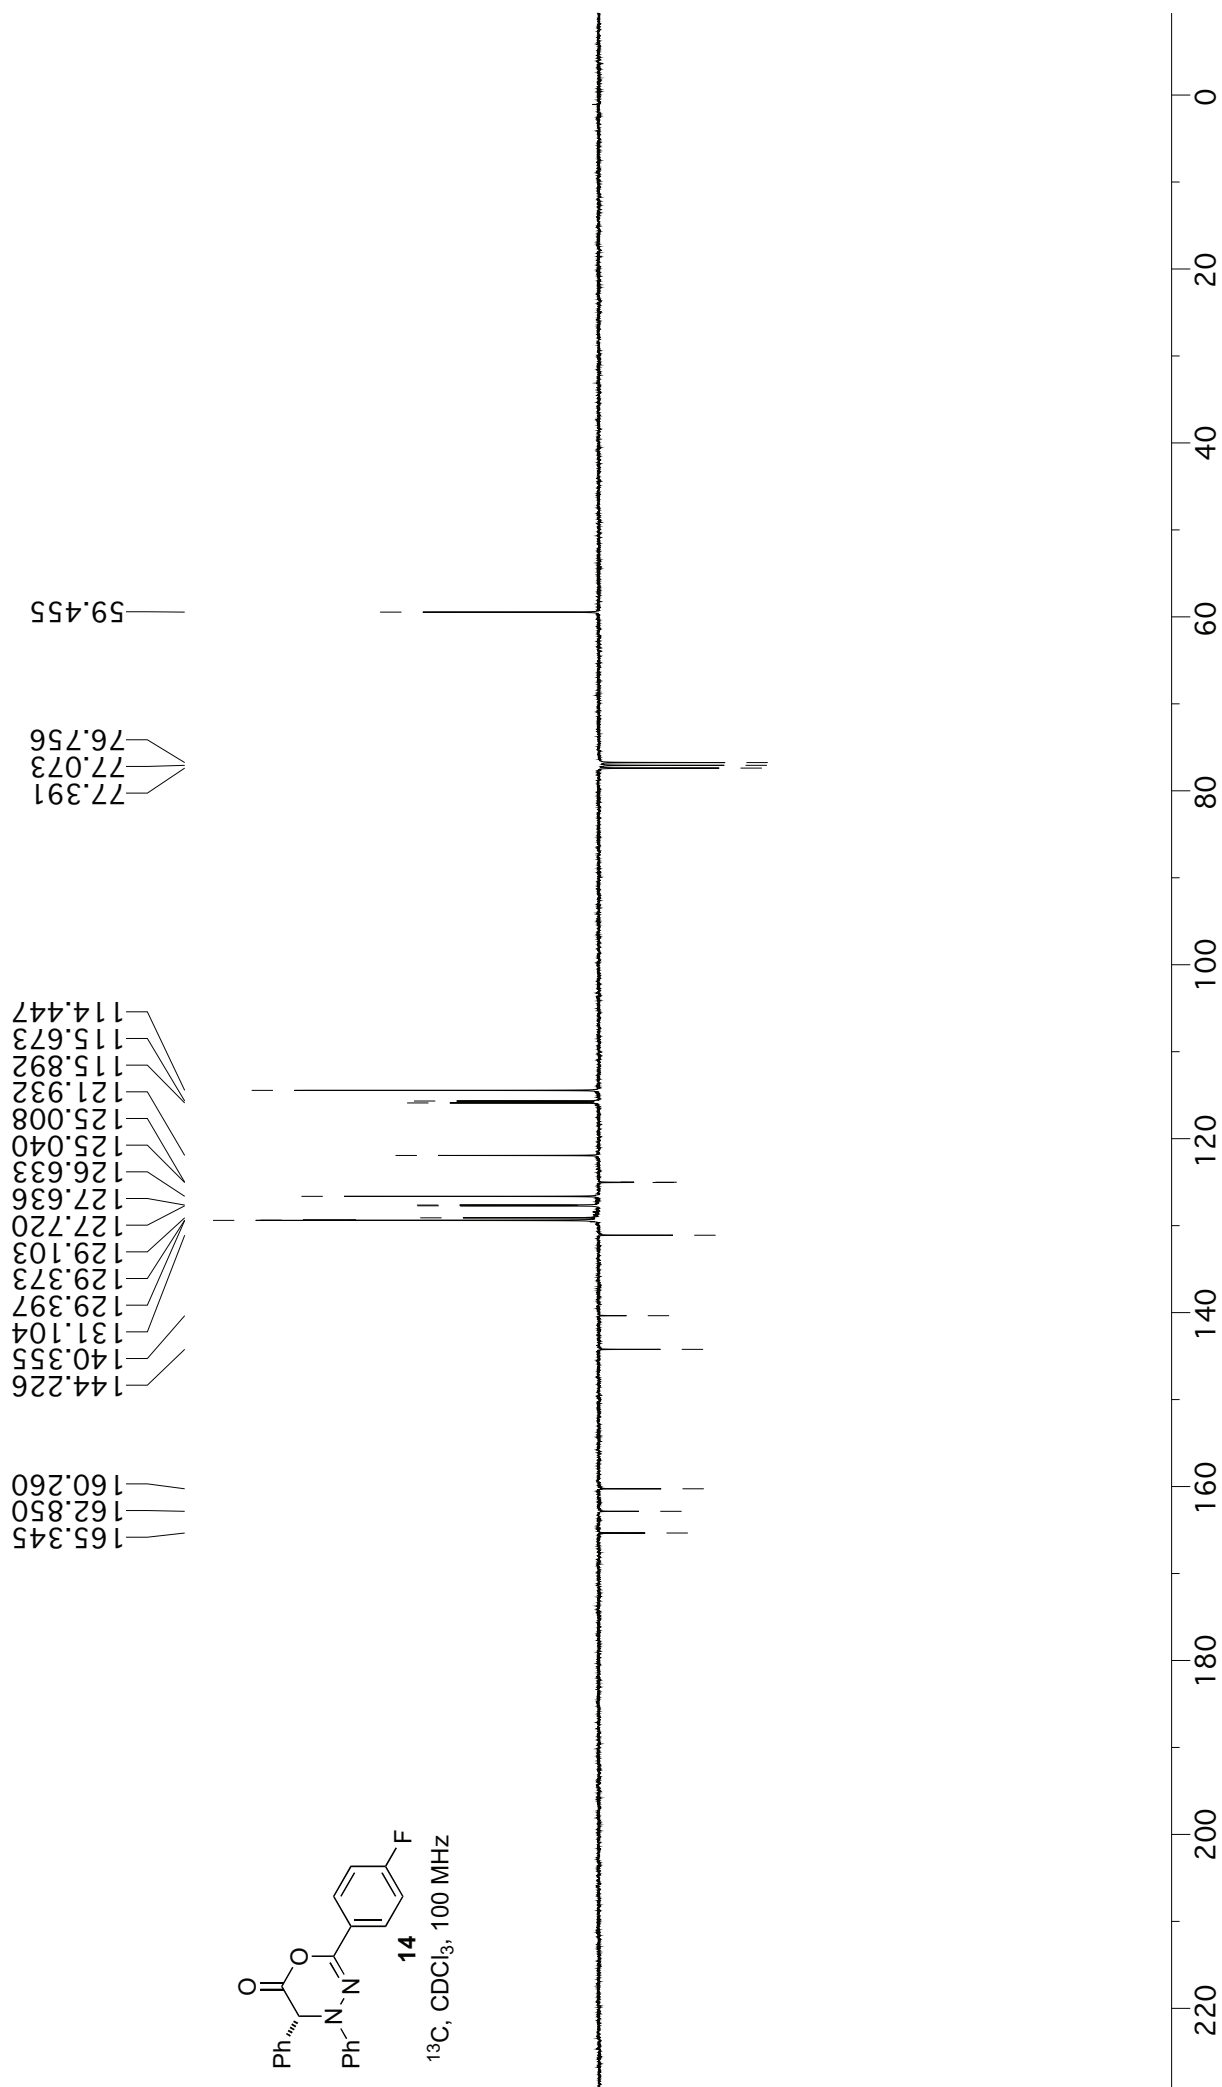



7.654  
7.652  
7.651  
7.648  
7.634  
7.631  
7.628  
7.593  
7.587  
7.583  
7.568  
7.564  
7.562  
7.558  
7.558  
7.514  
7.300  
7.294  
7.280  
7.274  
7.267  
7.260  
7.259  
7.241  
7.239  
7.232  
7.226  
7.223  
7.221  
7.217  
7.215  
7.209  
7.201  
7.169  
7.167  
7.160  
7.147  
7.145  
7.046  
7.044  
7.039  
7.037  
7.025  
7.023  
7.019  
7.016  
7.004  
7.002  
6.998  
6.996  
6.950  
6.948  
6.945  
6.930  
6.914  
6.912  
6.909  
5.961

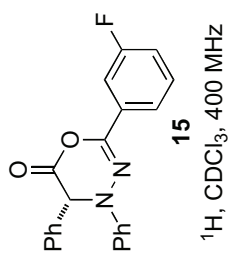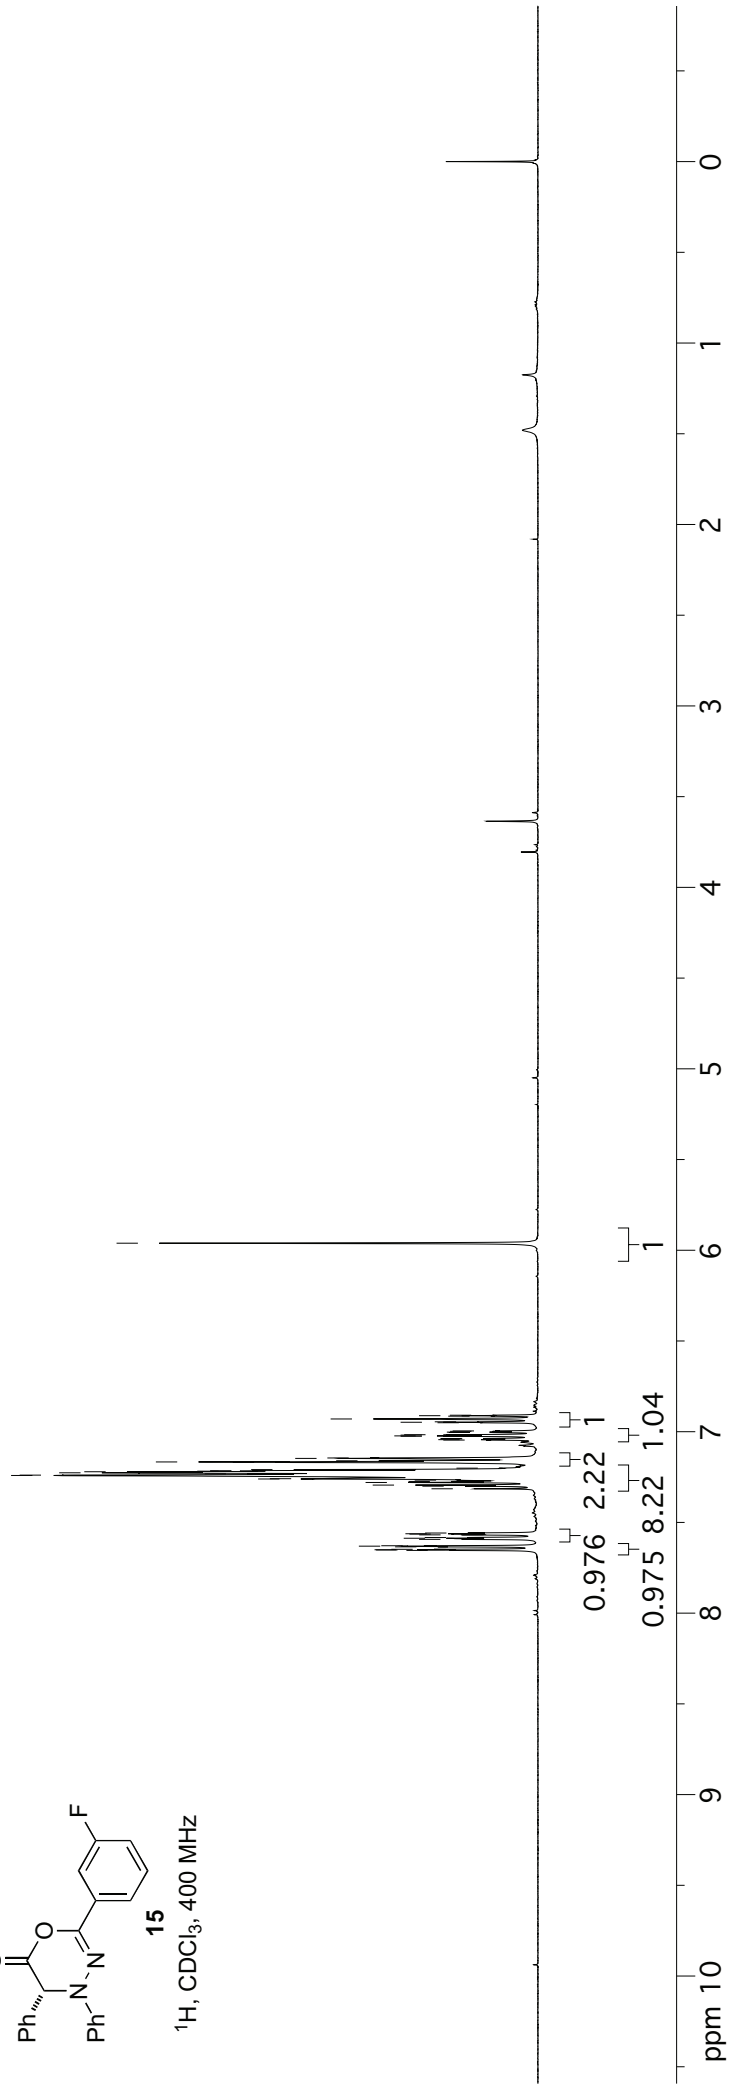

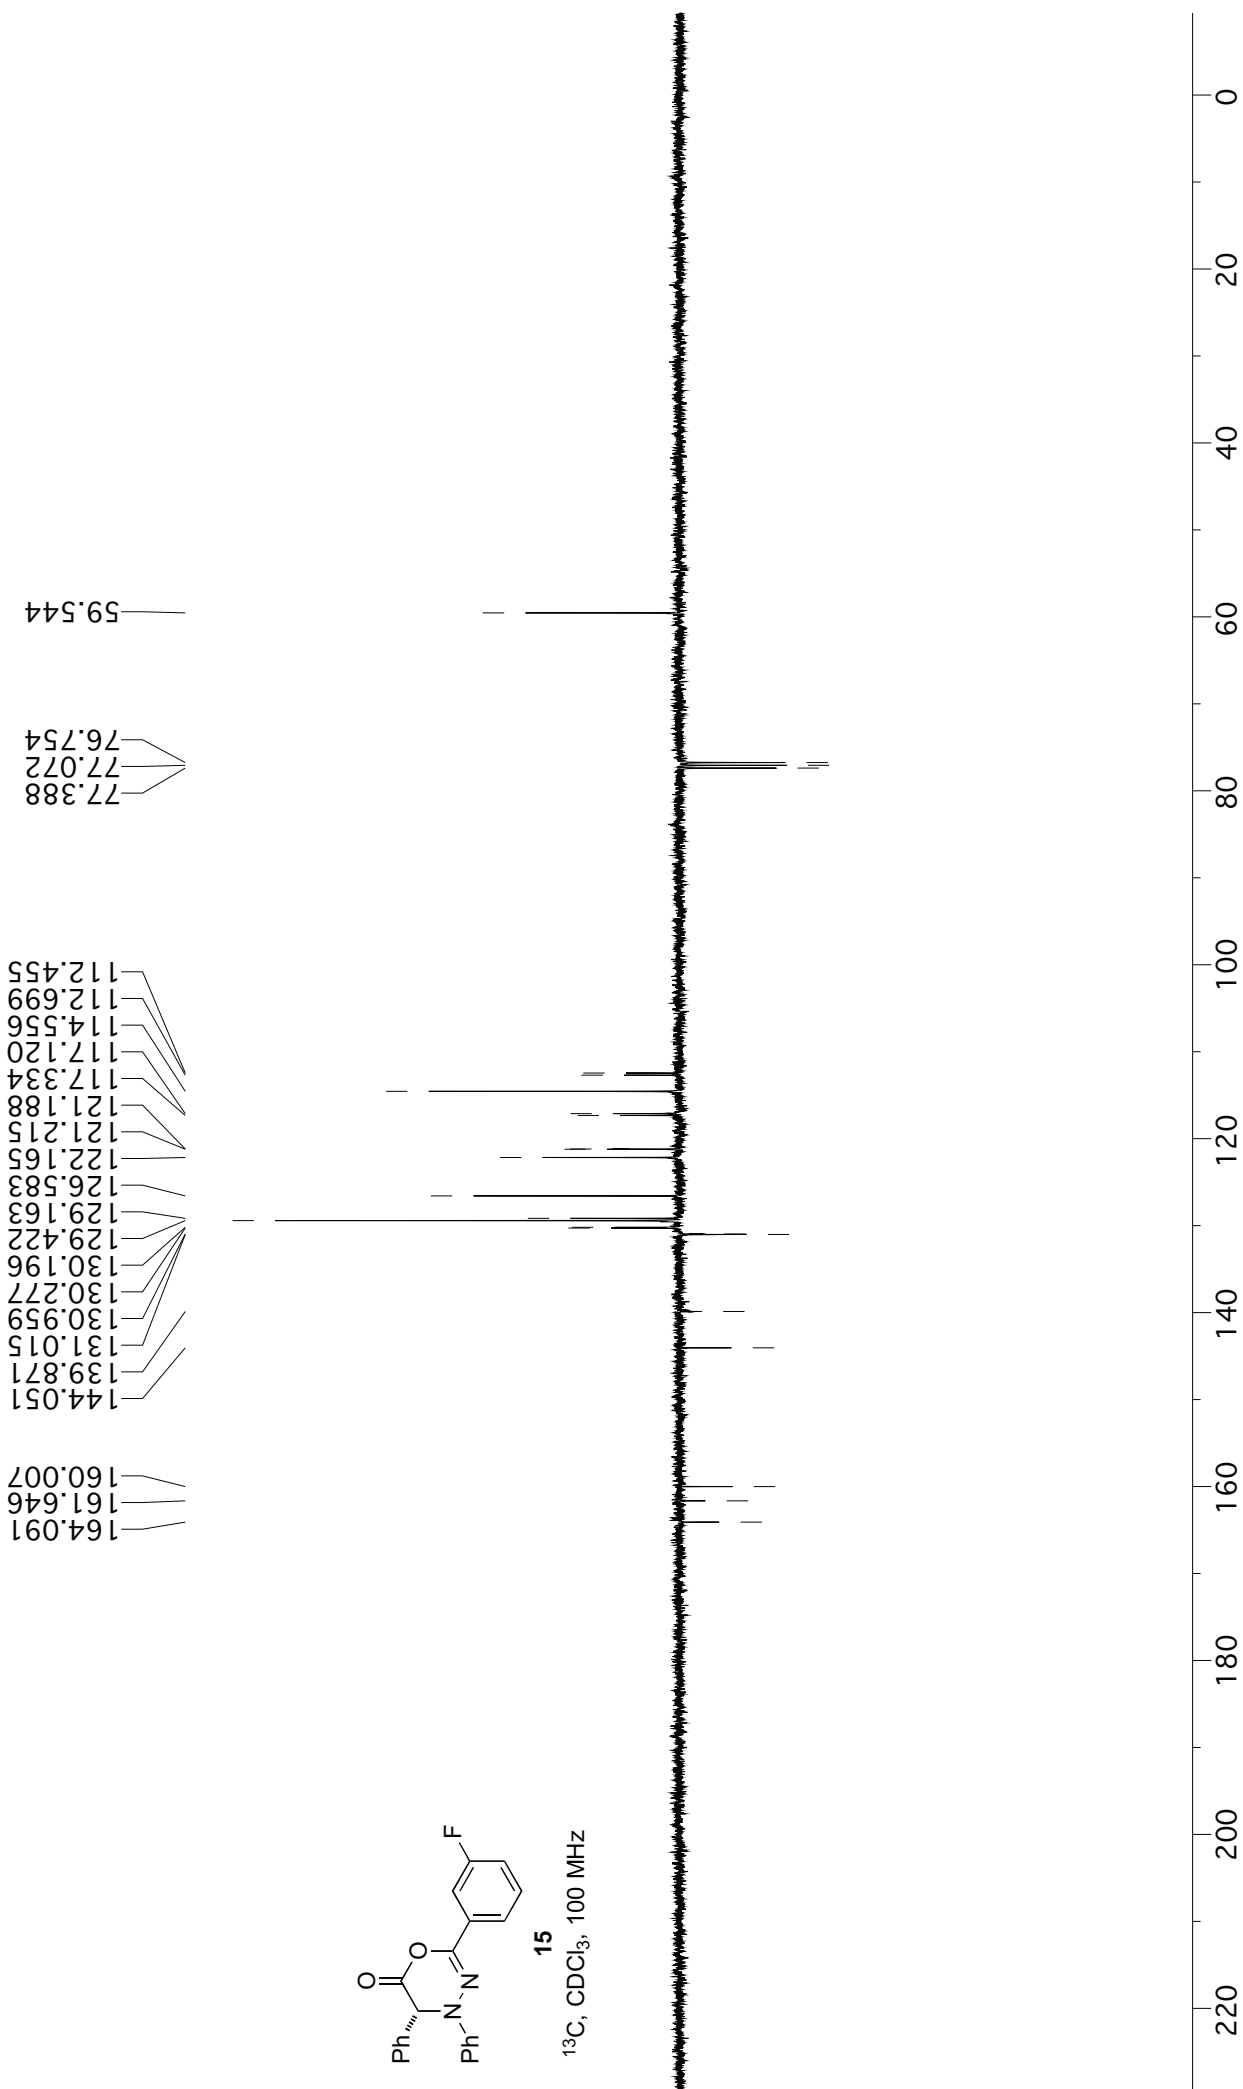

7.719  
7.713  
7.692  
7.687  
7.667  
7.661  
7.645  
7.639  
7.629  
7.623  
7.620  
7.618  
7.615  
7.611  
7.604  
7.602  
7.595  
7.592  
7.579  
7.577  
7.571  
7.563  
7.555  
7.552  
7.547  
7.540  
7.533  
7.524  
7.516  
7.510  
7.505  
7.501  
7.496  
7.491  
7.482  
7.468  
7.461  
7.423  
7.419  
7.411  
7.407  
7.394  
7.383  
7.379  
7.372  
7.369  
7.323  
7.319  
7.315  
7.311  
7.304  
7.302  
7.295  
7.292  
7.279  
7.277  
7.271  
7.263  
7.255  
7.252  
7.247  
7.240  
7.233  
7.224  
7.216  
7.210  
7.205  
7.201  
7.196  
7.191  
7.182  
7.168  
7.161  
7.123  
7.119  
7.111  
7.107  
7.094  
7.083  
7.079  
7.072  
7.069  
7.046  
7.042  
6.947  
6.942  
6.937  
6.923  
6.919  
6.915  
6.901  
6.895  
6.891  
5.985

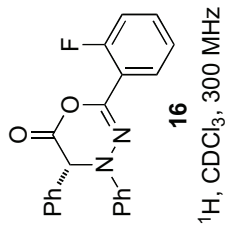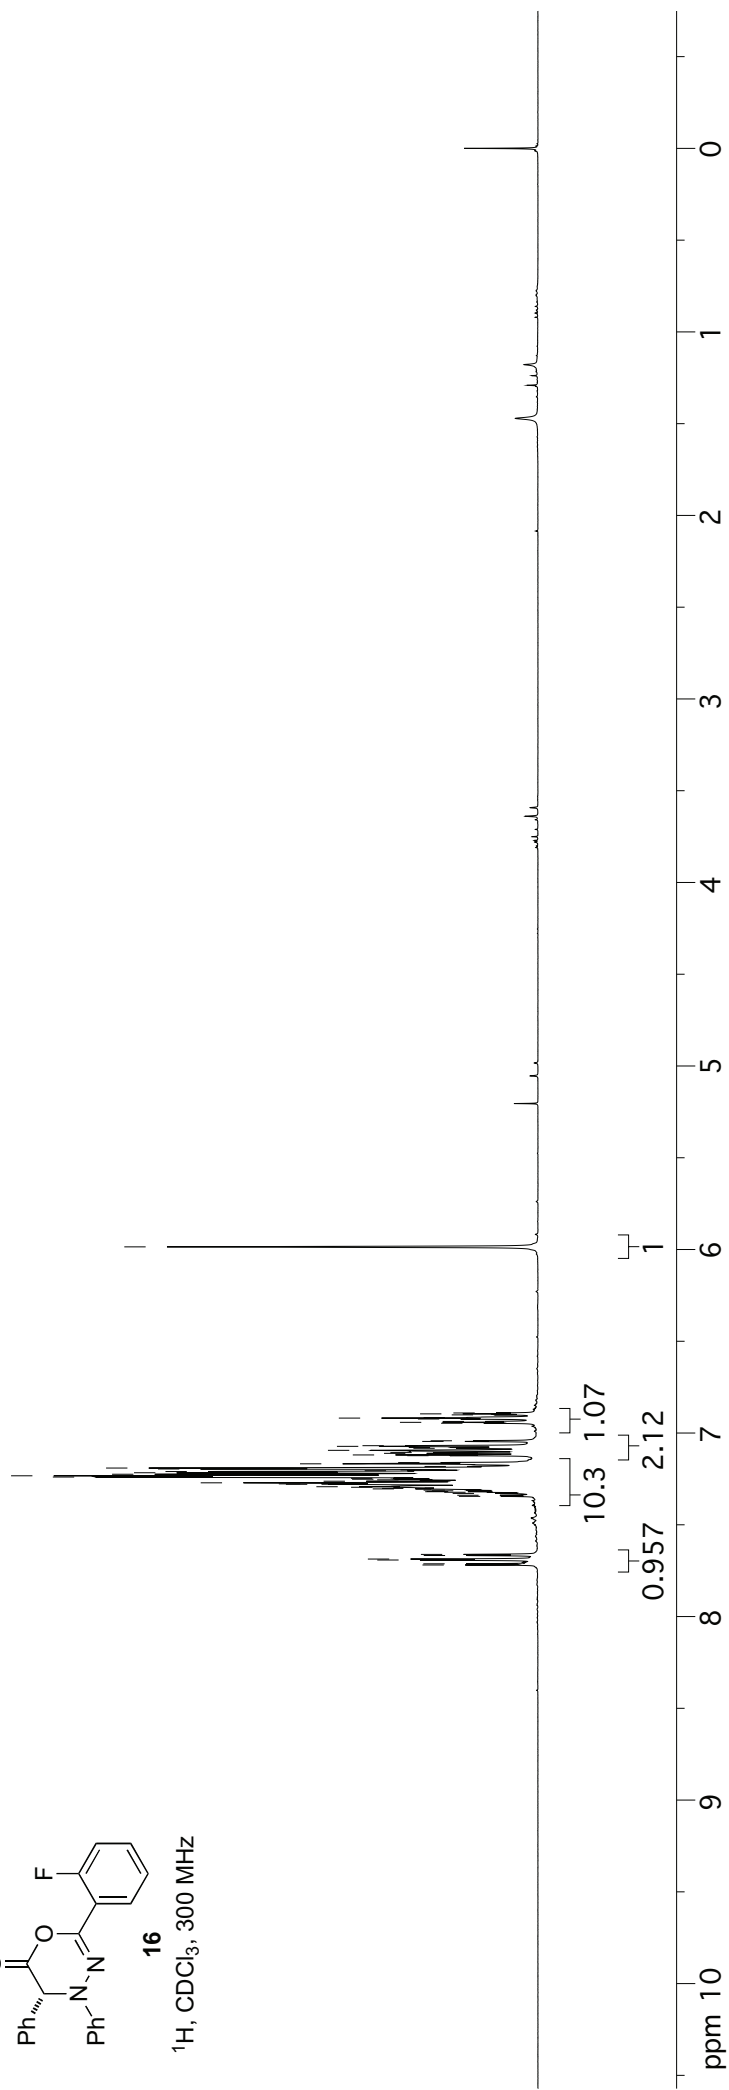

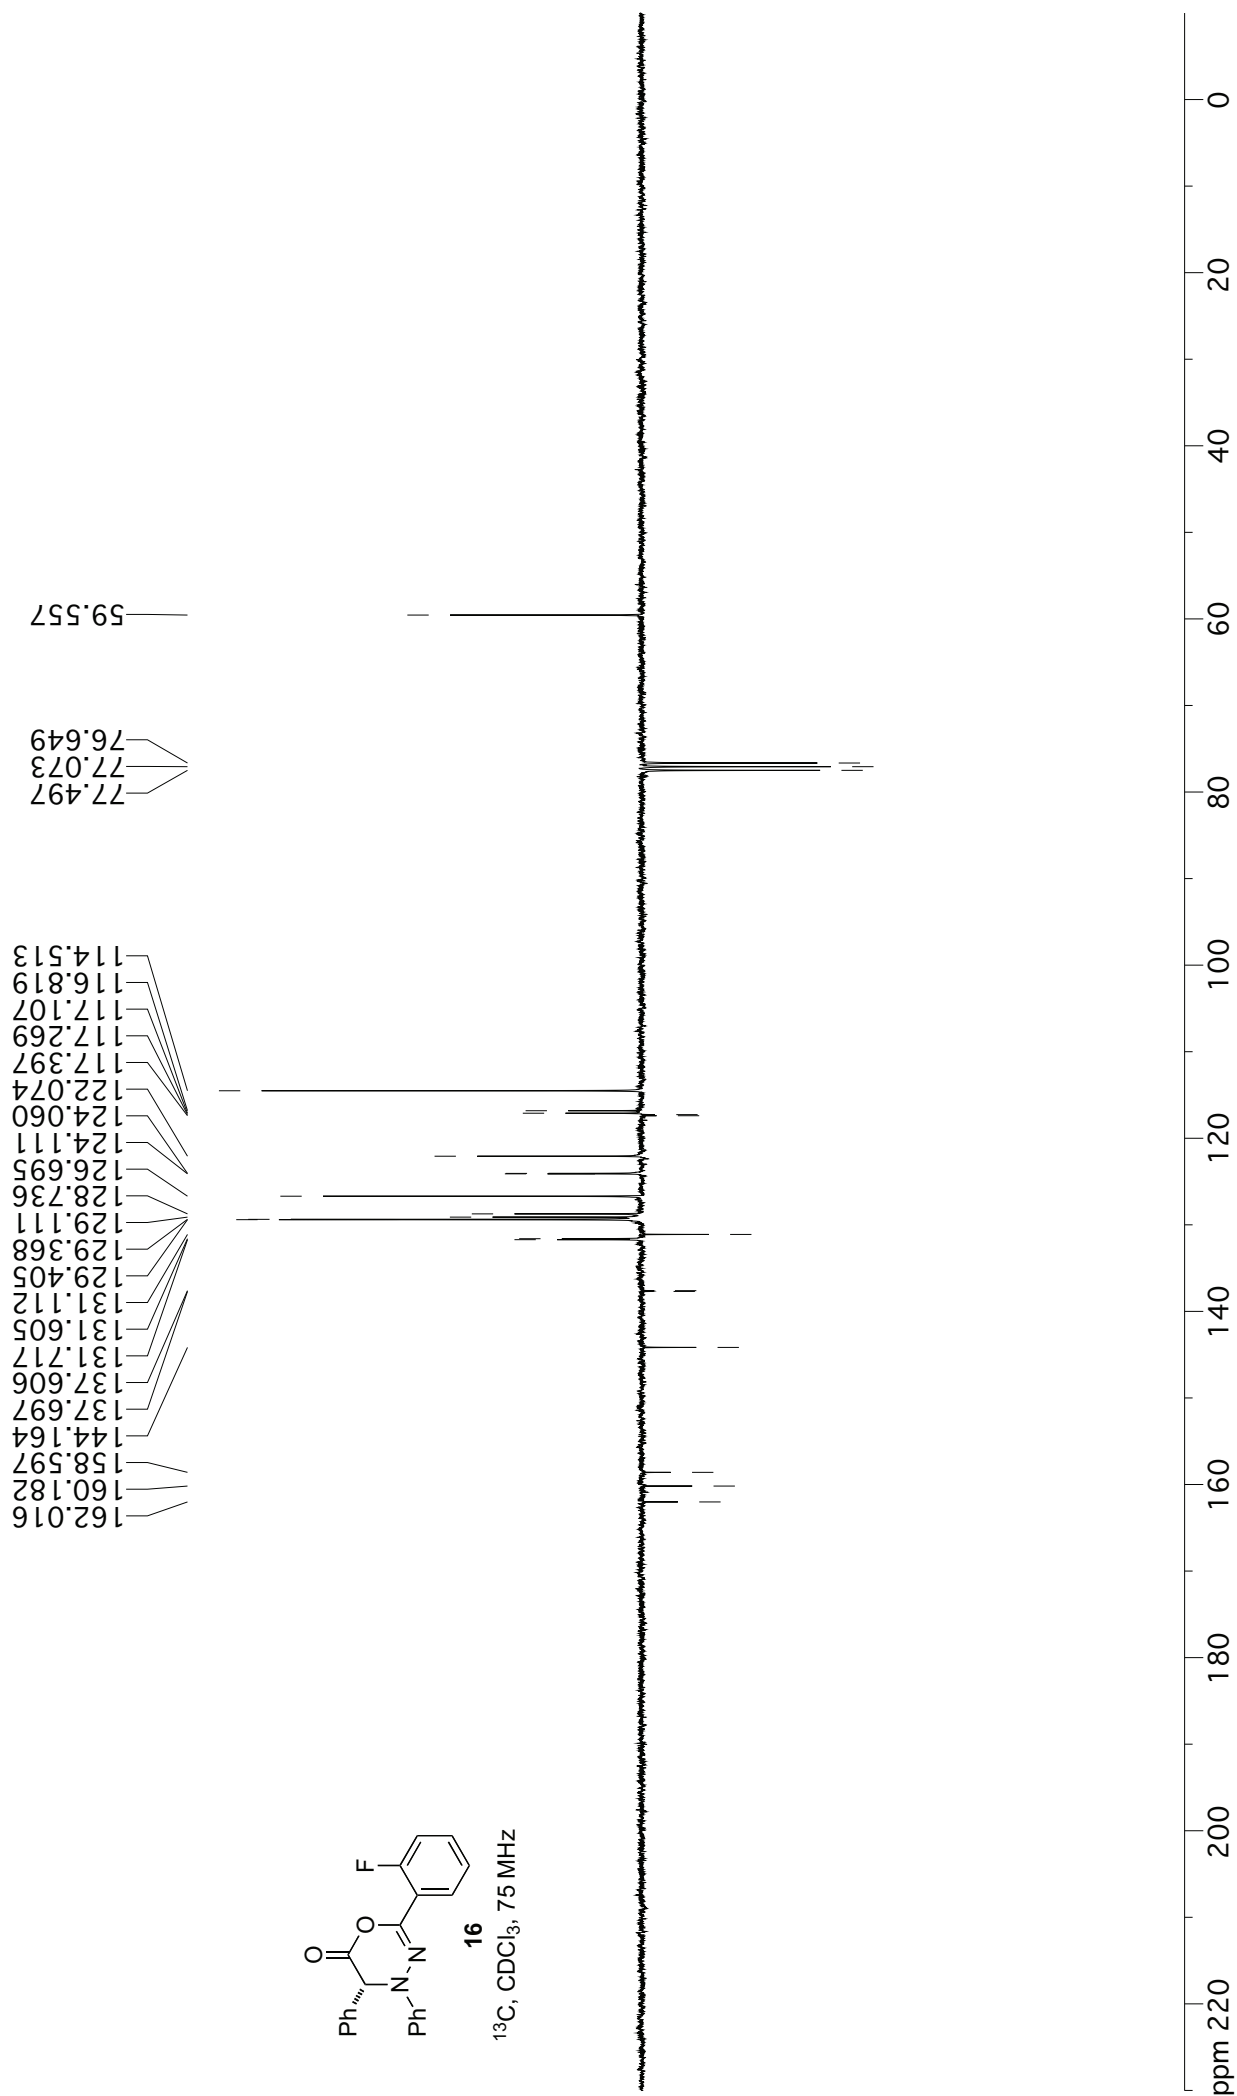

7.746  
7.738  
7.732  
7.716  
7.709  
7.701  
7.470  
7.462  
7.455  
7.439  
7.433  
7.425  
7.267  
7.260  
7.252  
7.236  
7.231  
7.220  
7.207  
7.195  
7.187  
7.161  
7.157  
7.150  
7.131  
7.128  
6.949  
6.945  
6.941  
6.921  
6.901  
6.897  
6.893  
5.948

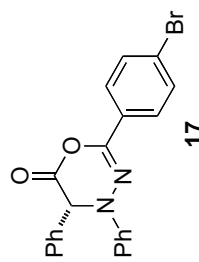

$^1\text{H}$ ,  $\text{CDCl}_3$ , 300 MHz

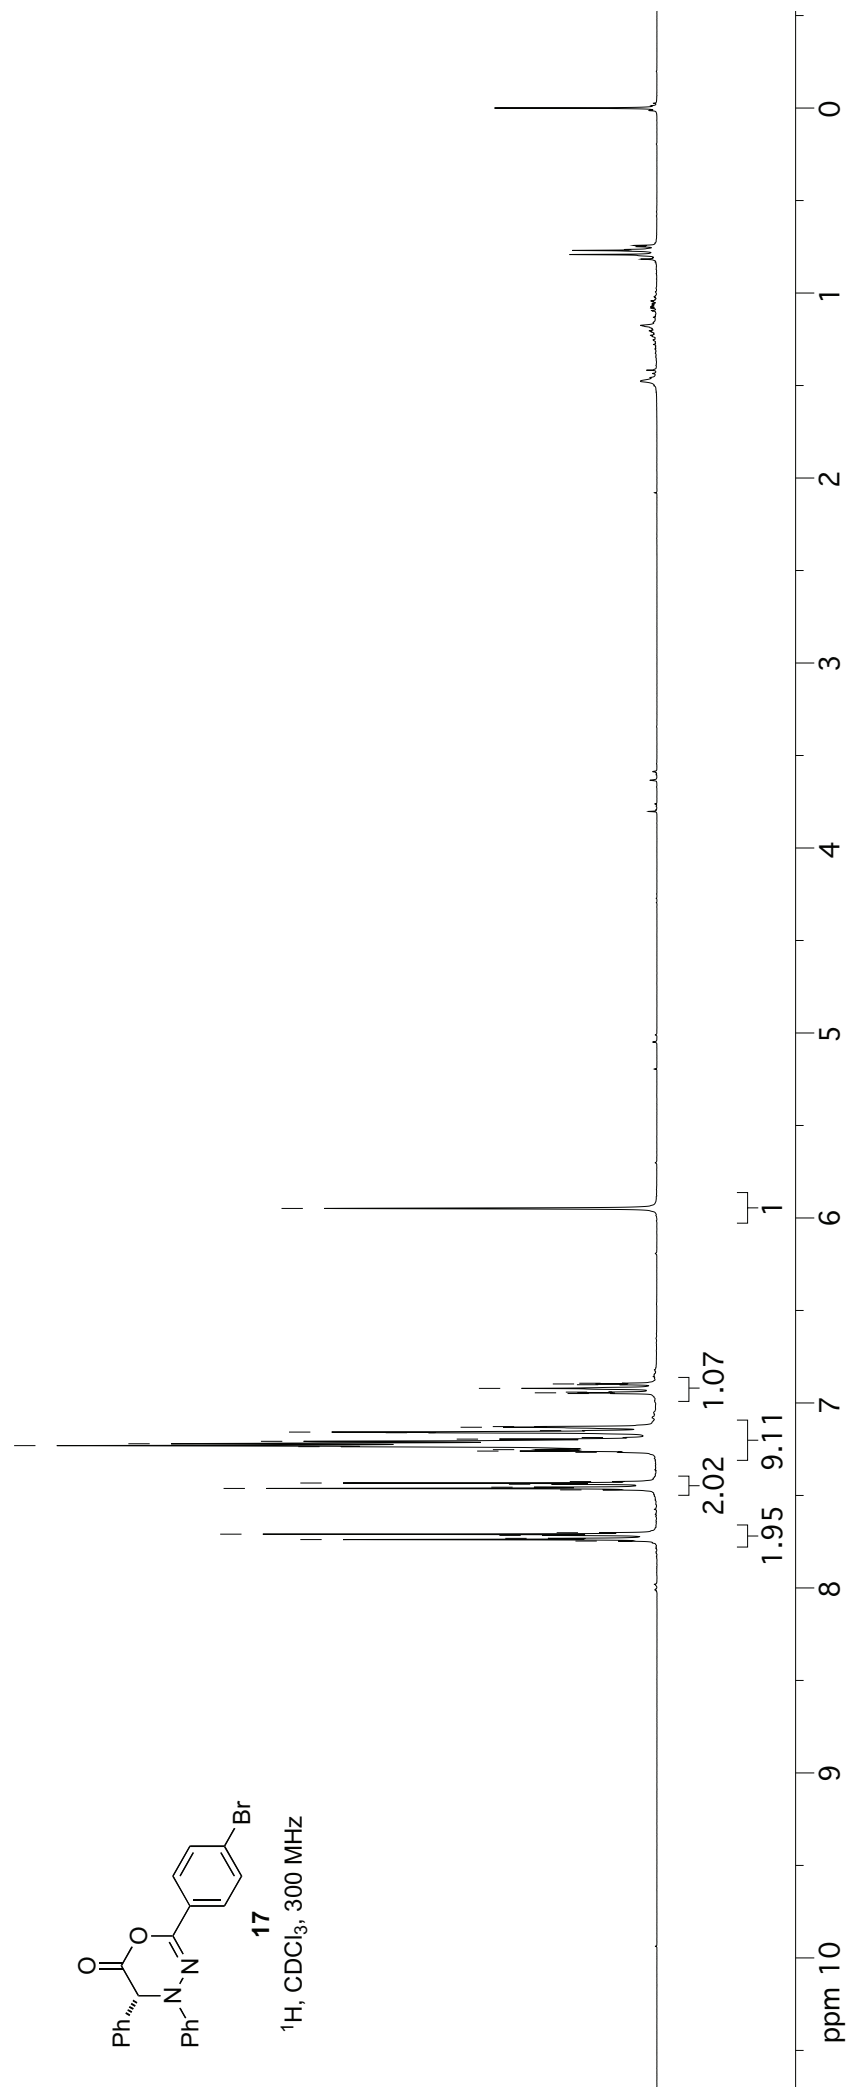

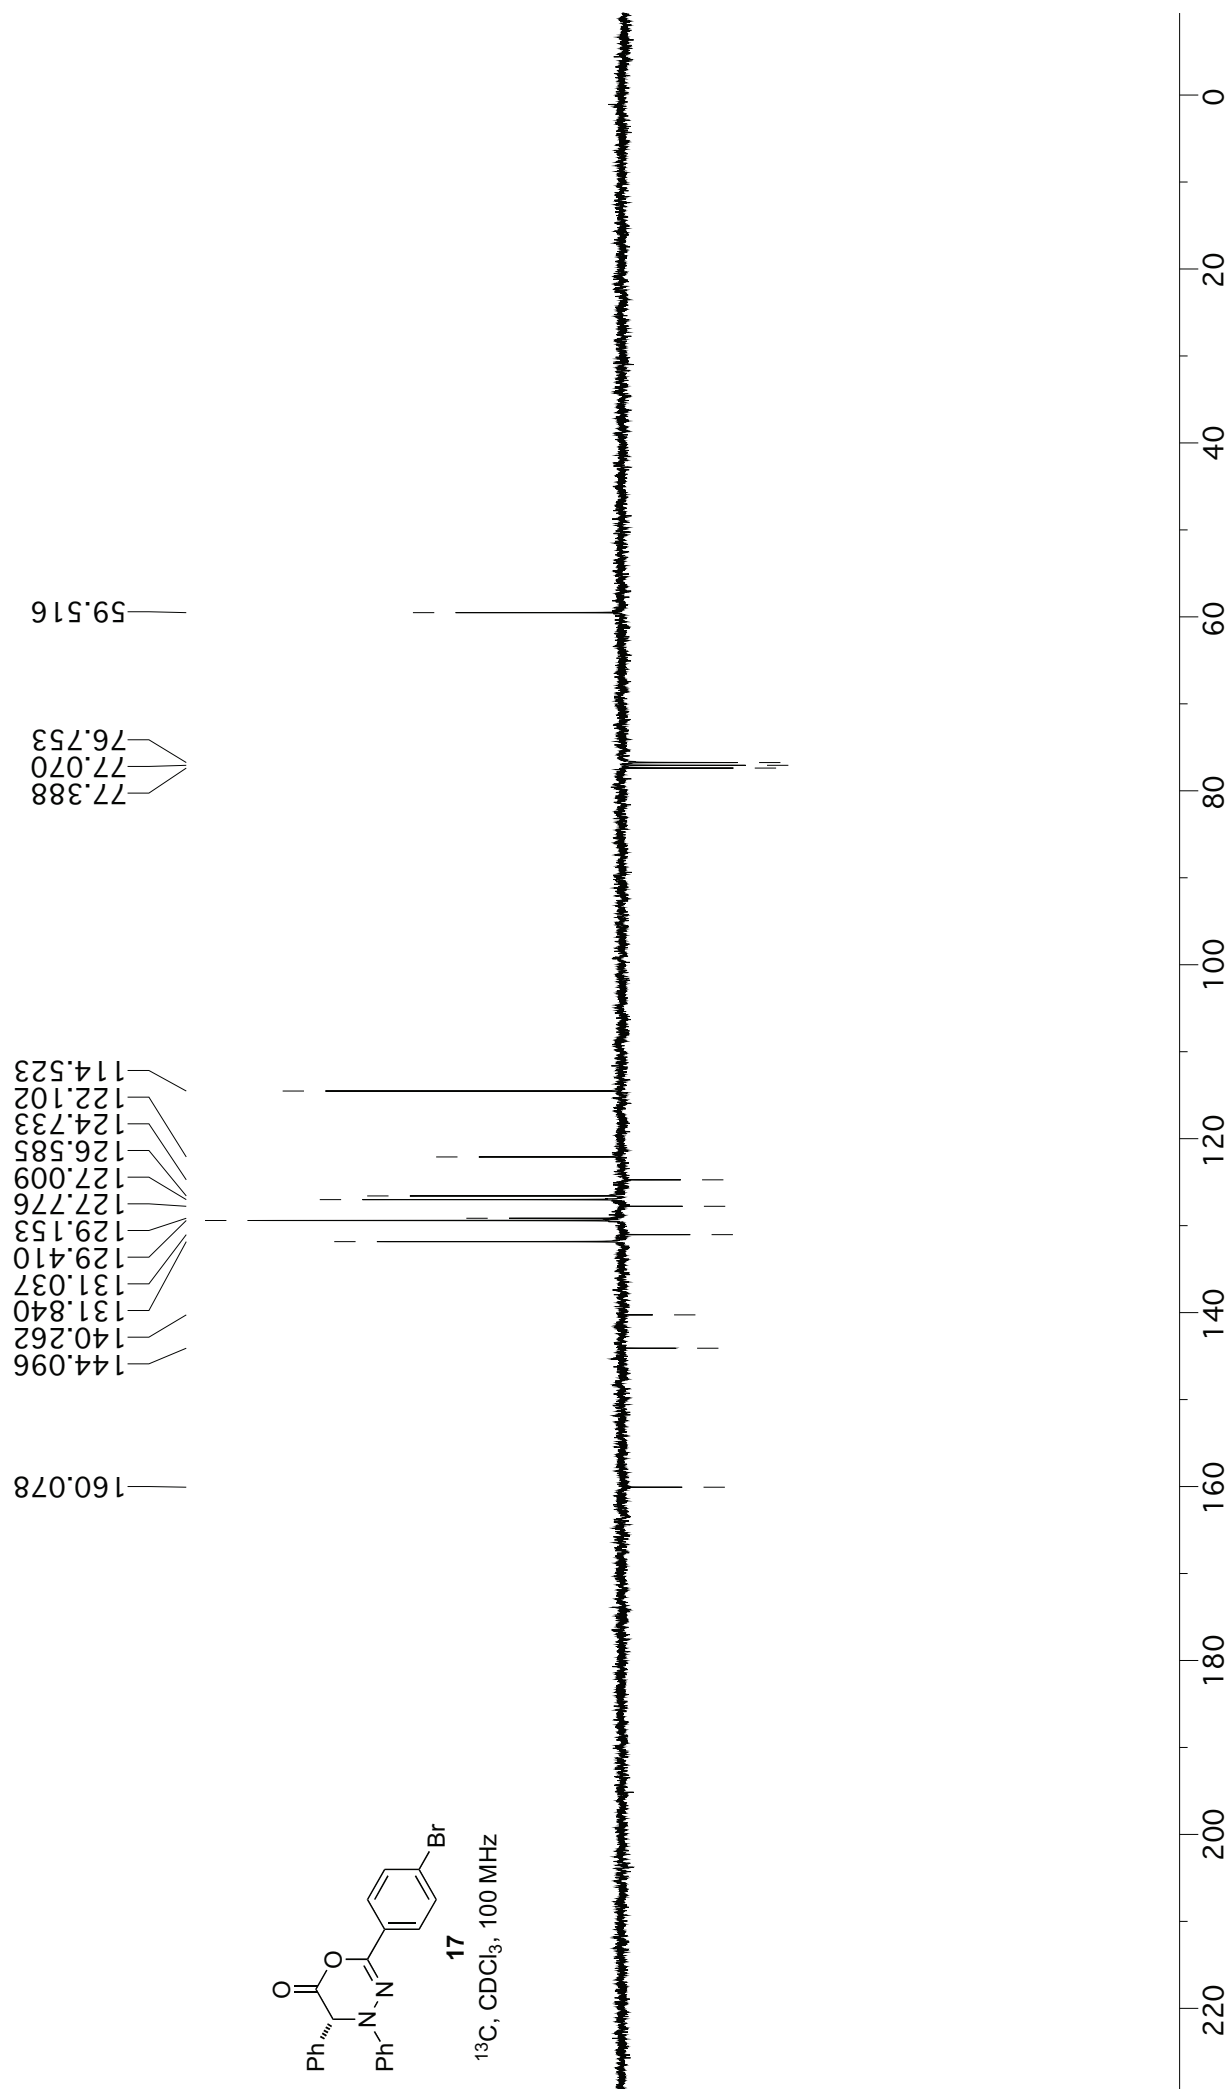

7.820  
7.812  
7.805  
7.789  
7.783  
7.775  
7.316  
7.308  
7.302  
7.285  
7.279  
7.271  
7.263  
7.256  
7.234  
7.224  
7.210  
7.199  
7.191  
7.164  
7.161  
7.134  
7.131  
6.950  
6.946  
6.943  
6.922  
6.903  
6.899  
6.895  
5.953

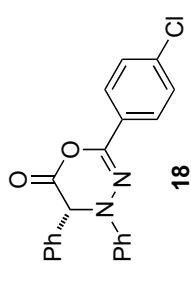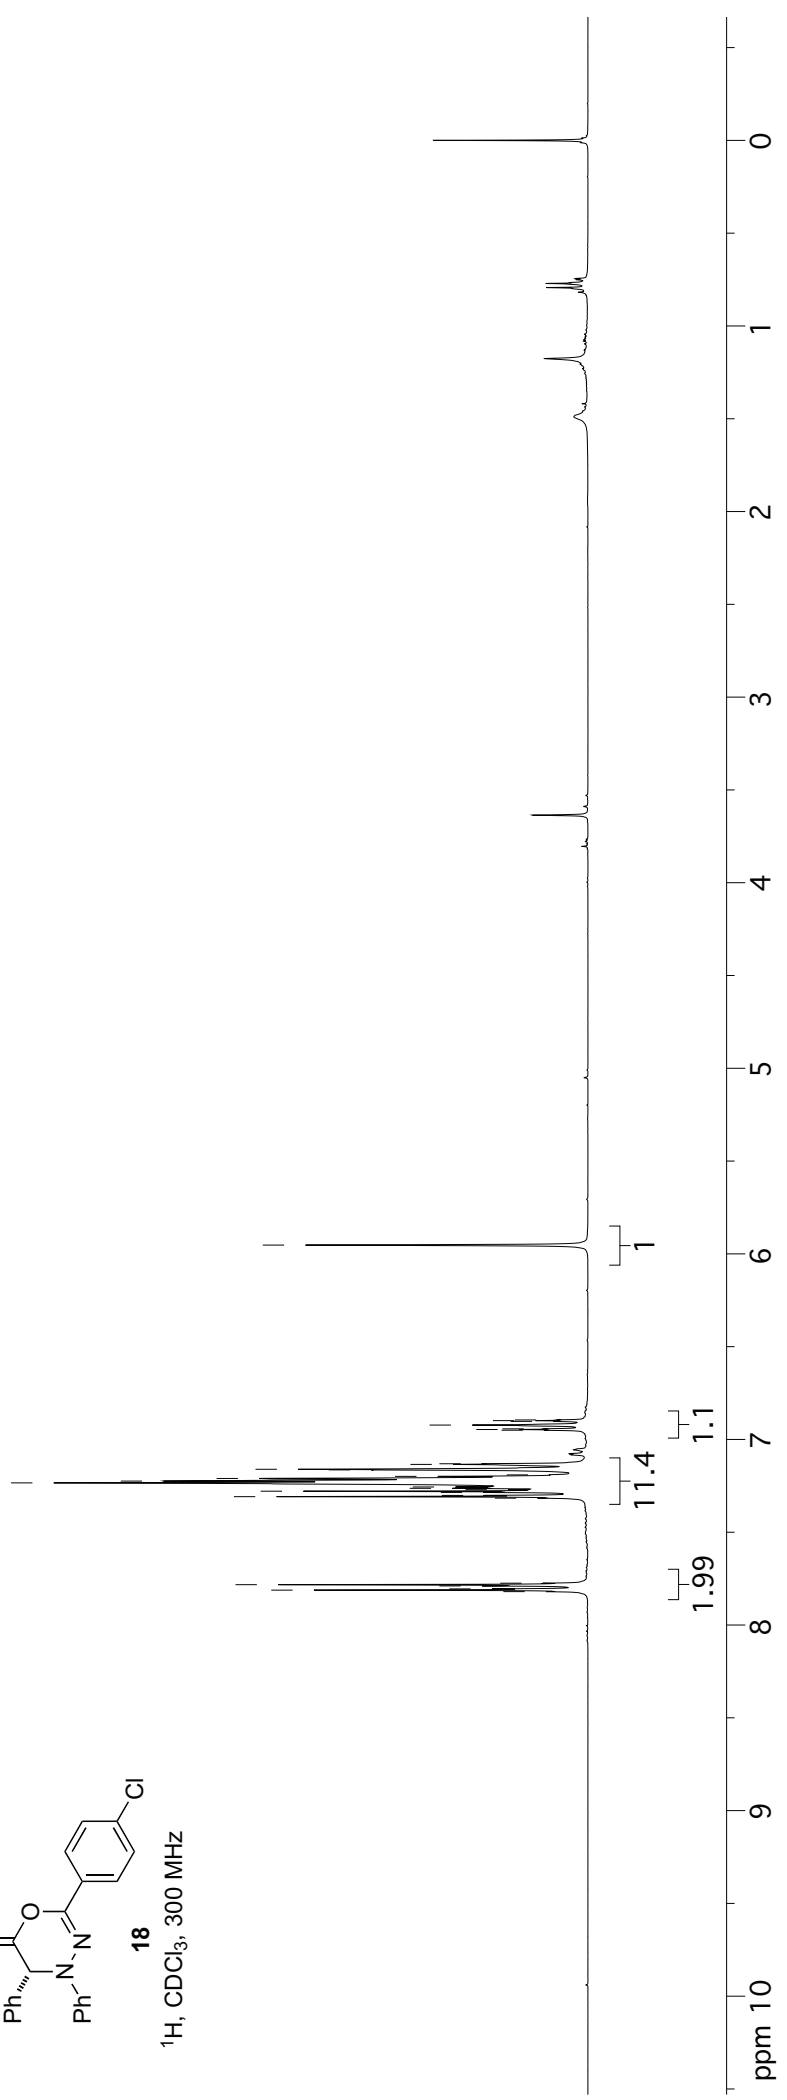

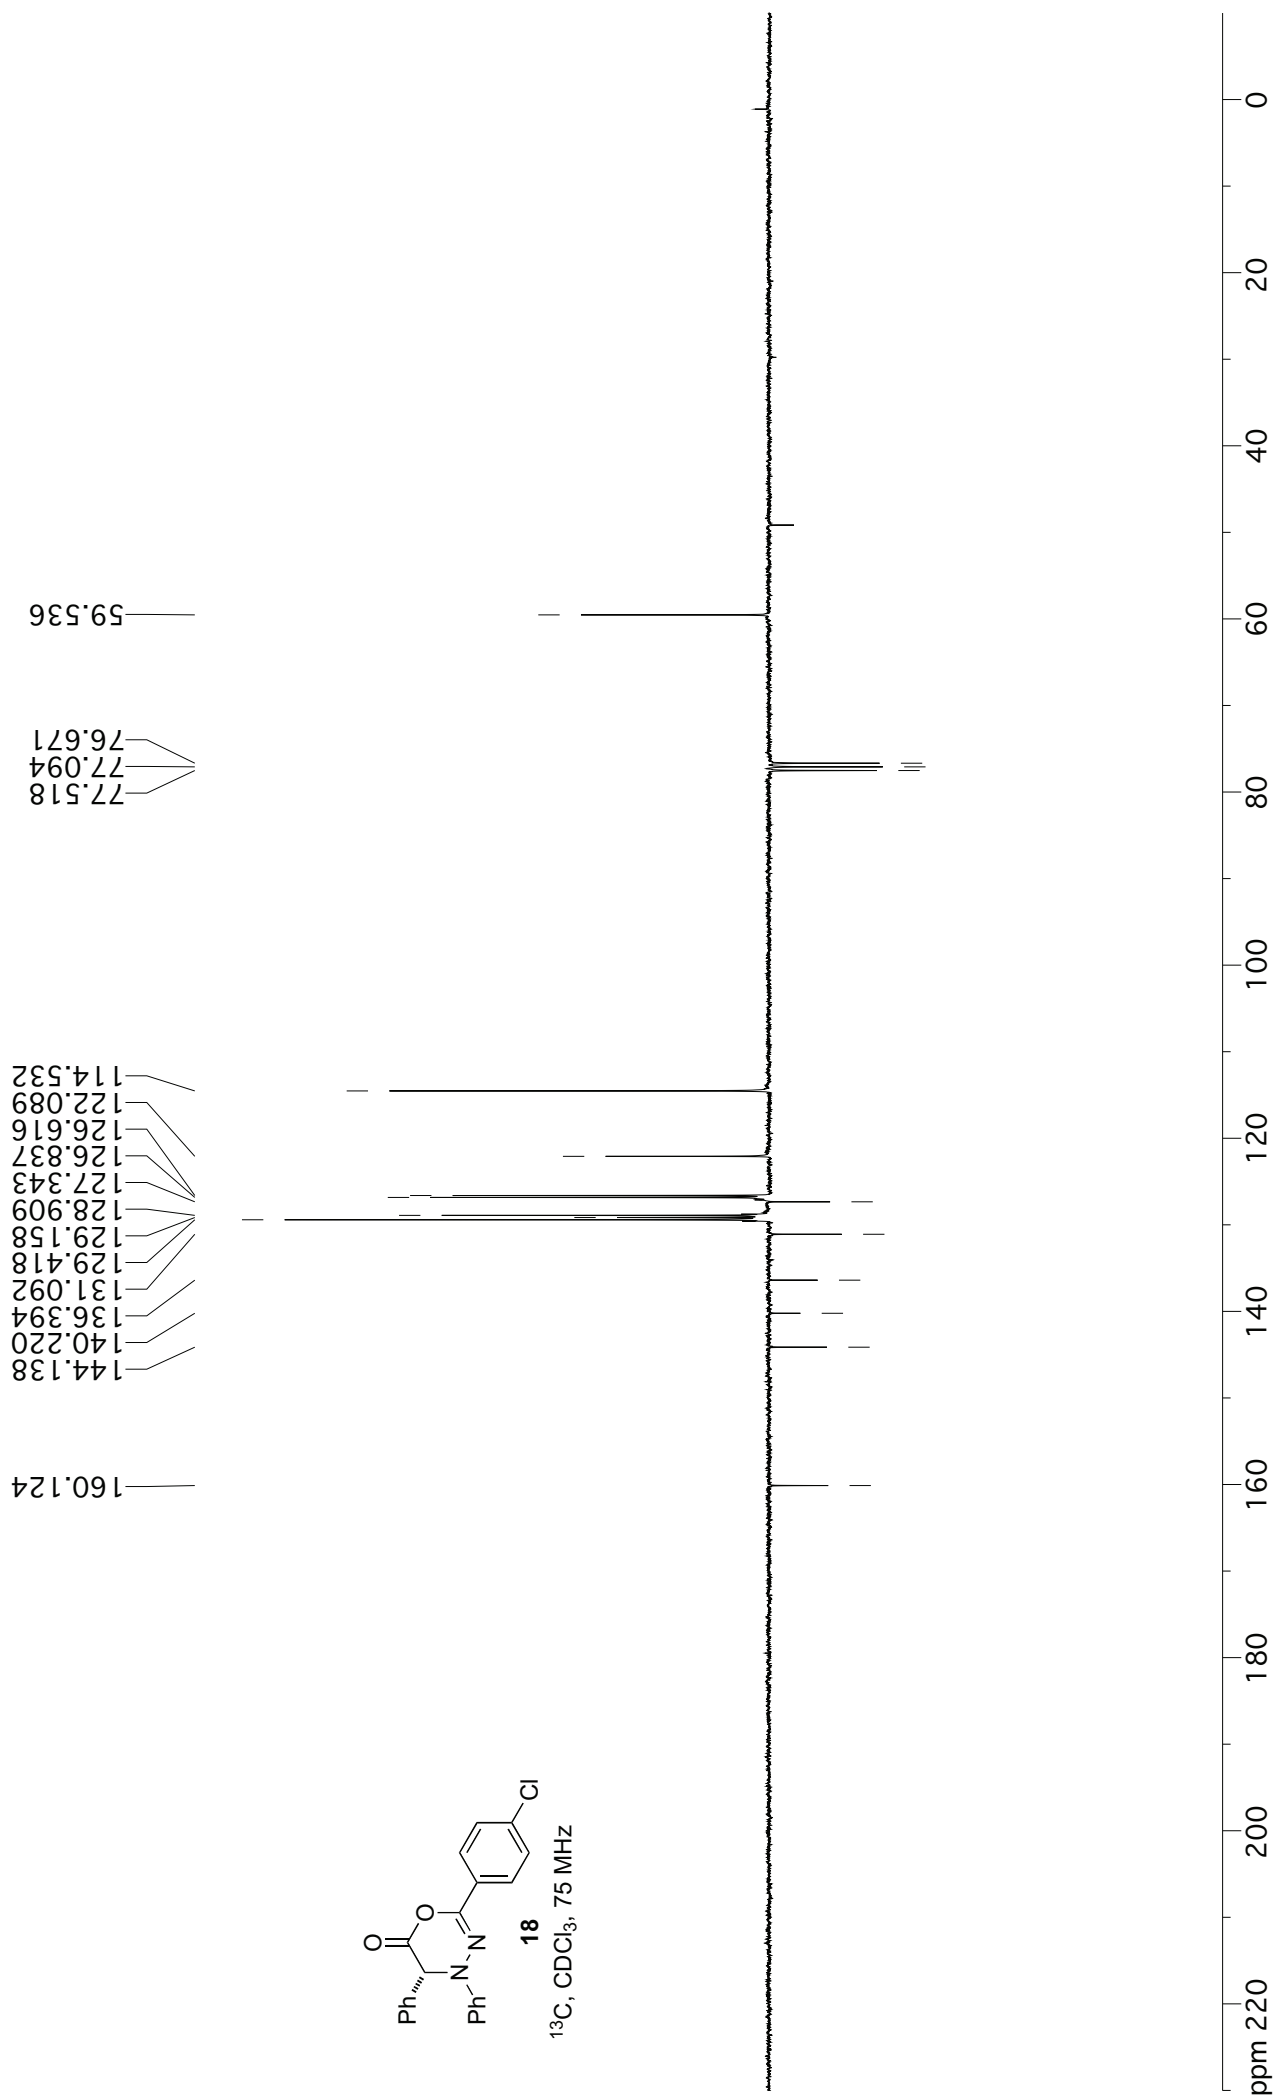





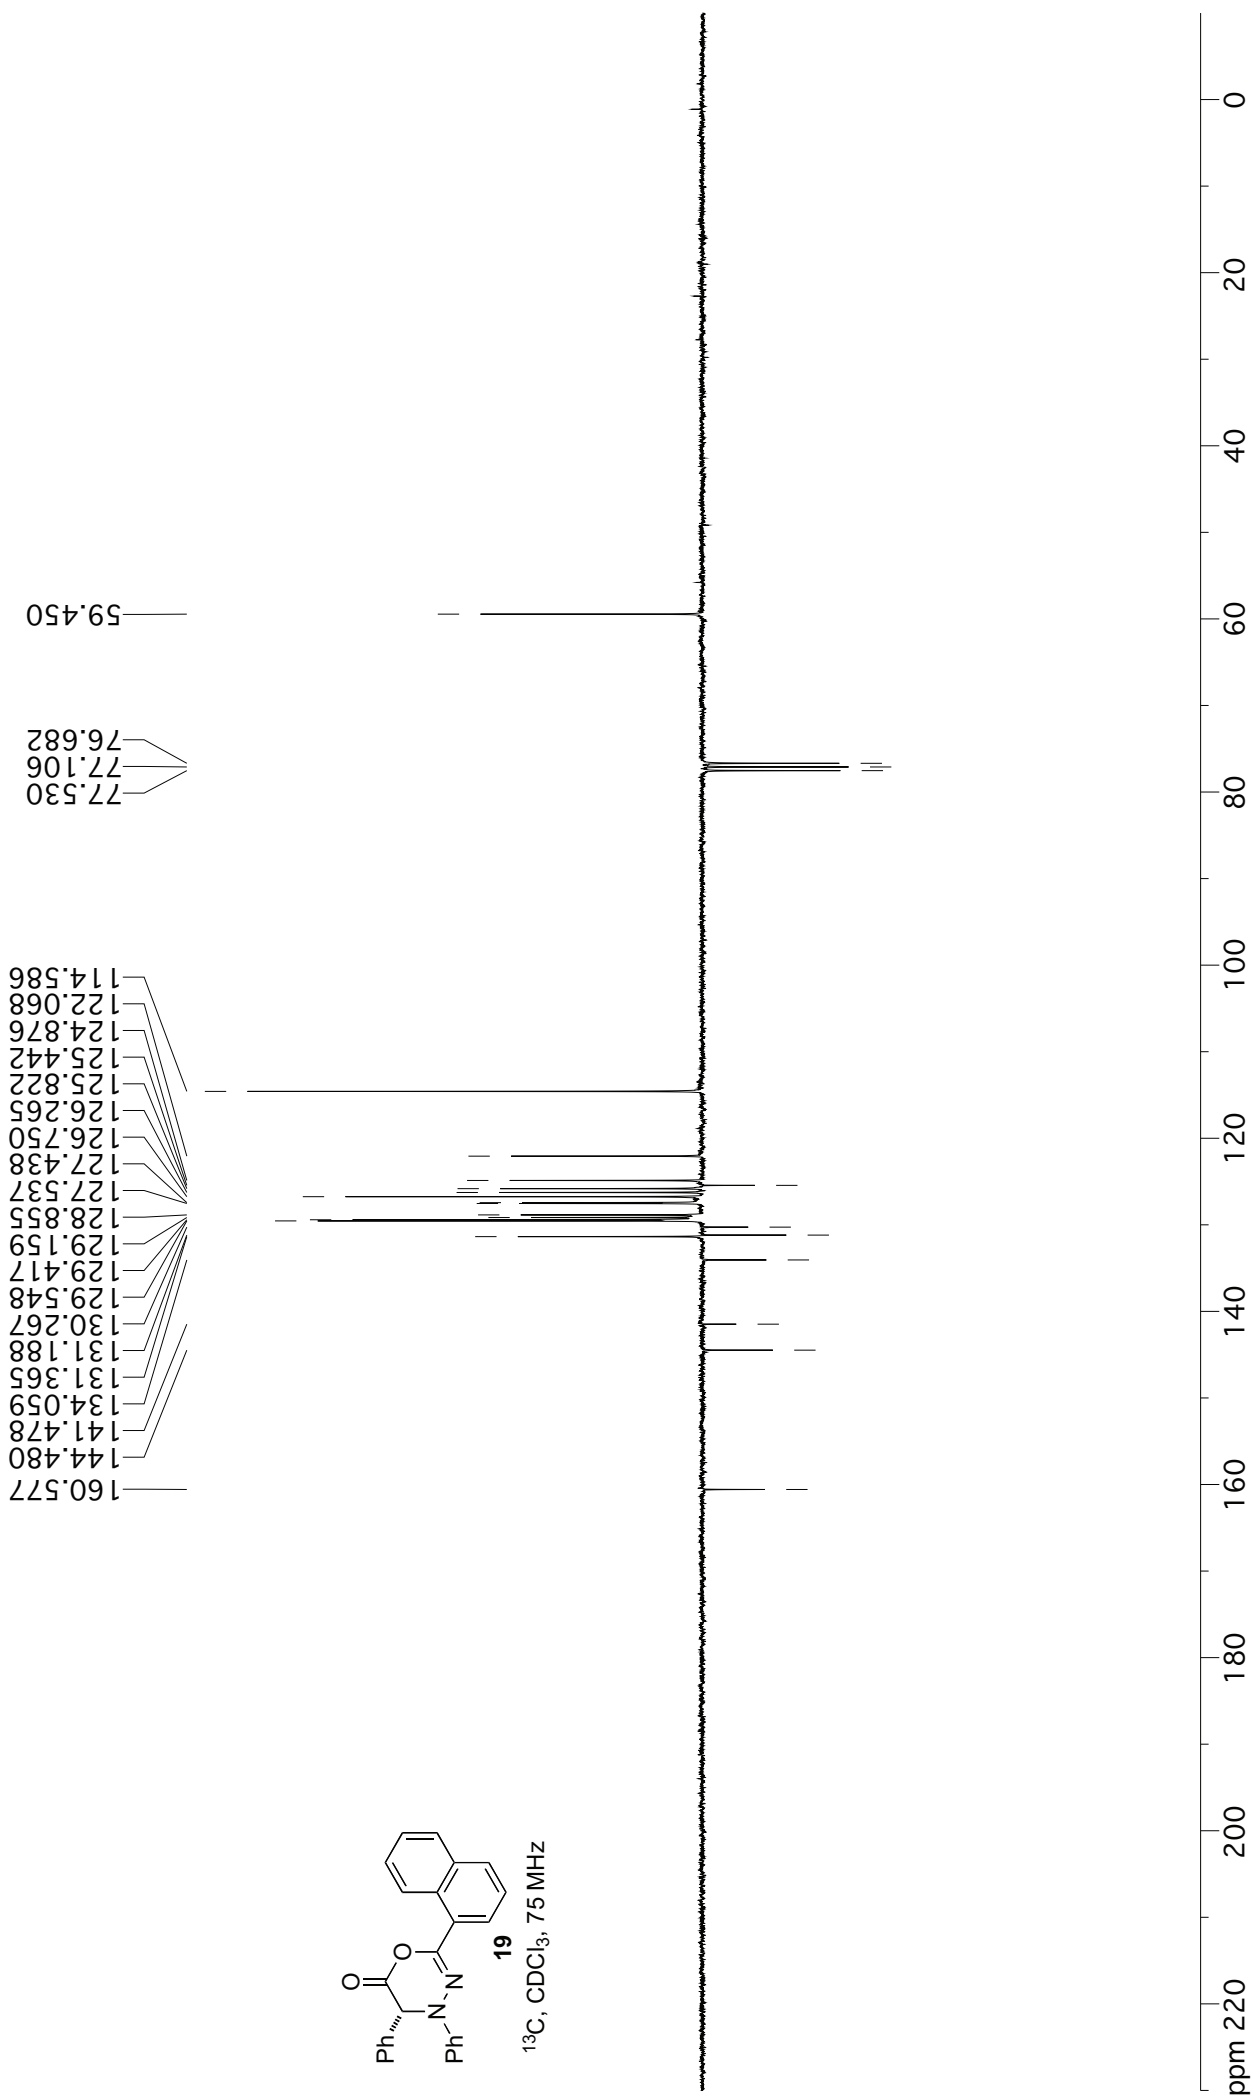

8.509  
7.980  
7.587  
7.555  
7.541  
7.526  
7.508  
7.495  
7.477  
7.457  
7.447  
7.431  
7.425  
7.421  
7.401  
7.386  
7.371  
7.358  
7.340  
7.324  
7.309  
7.281  
7.061  
7.046  
7.010  
6.997  
6.986  
6.984  
6.984  
5.929  
5.904  
5.892  
5.881  
5.871  
5.610  
5.323  
5.283  
5.260  
4.751  
4.741

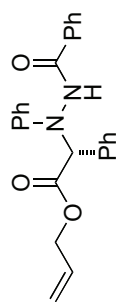

<sup>1</sup>H, CDCl<sub>3</sub>, 500 MHz

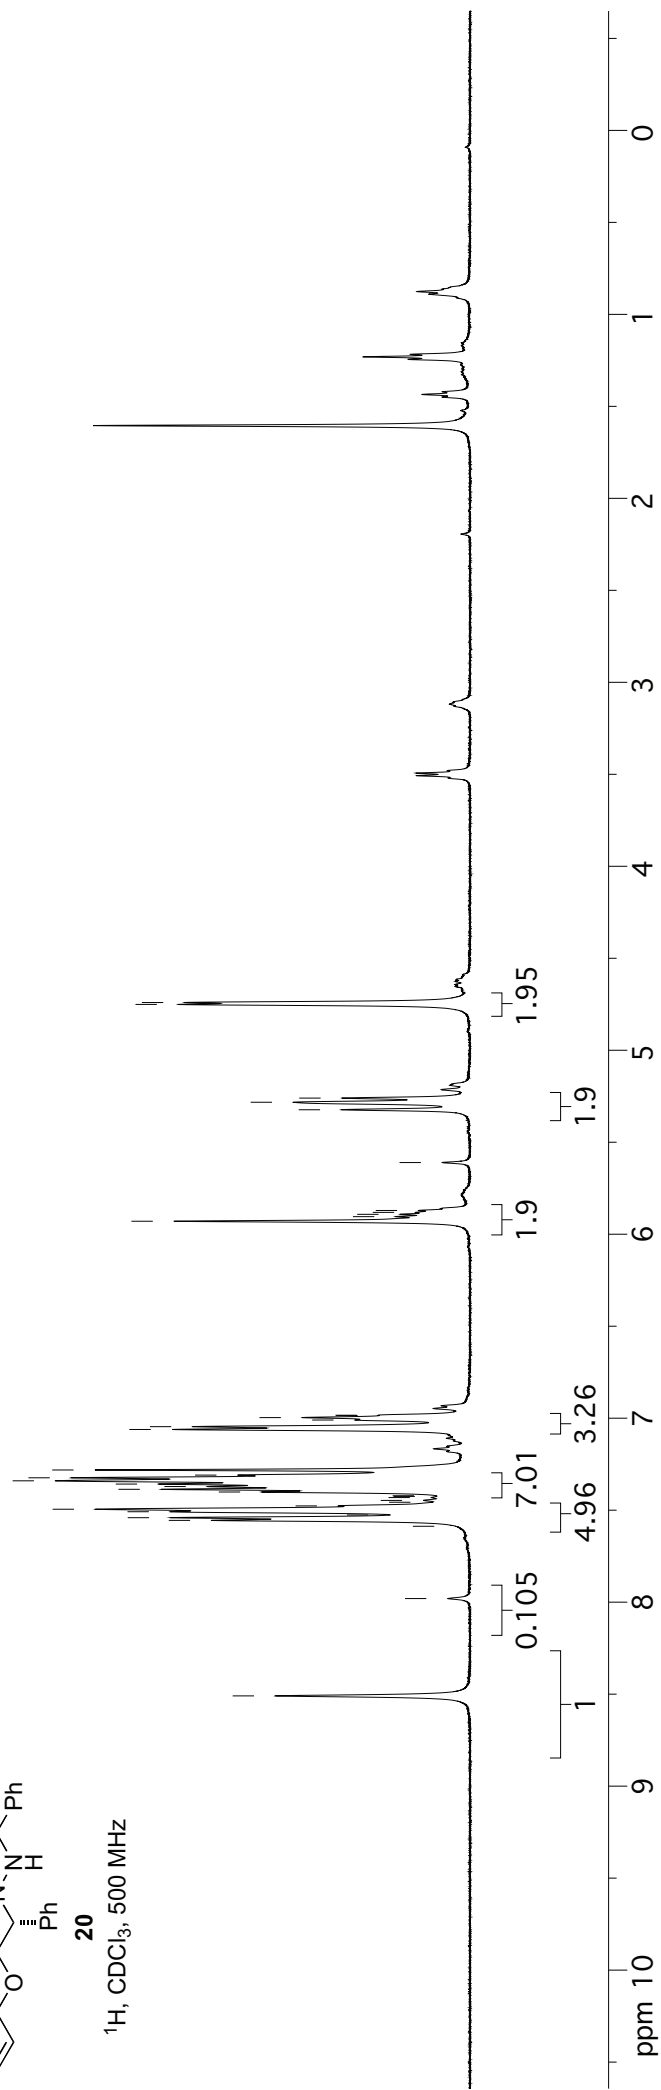

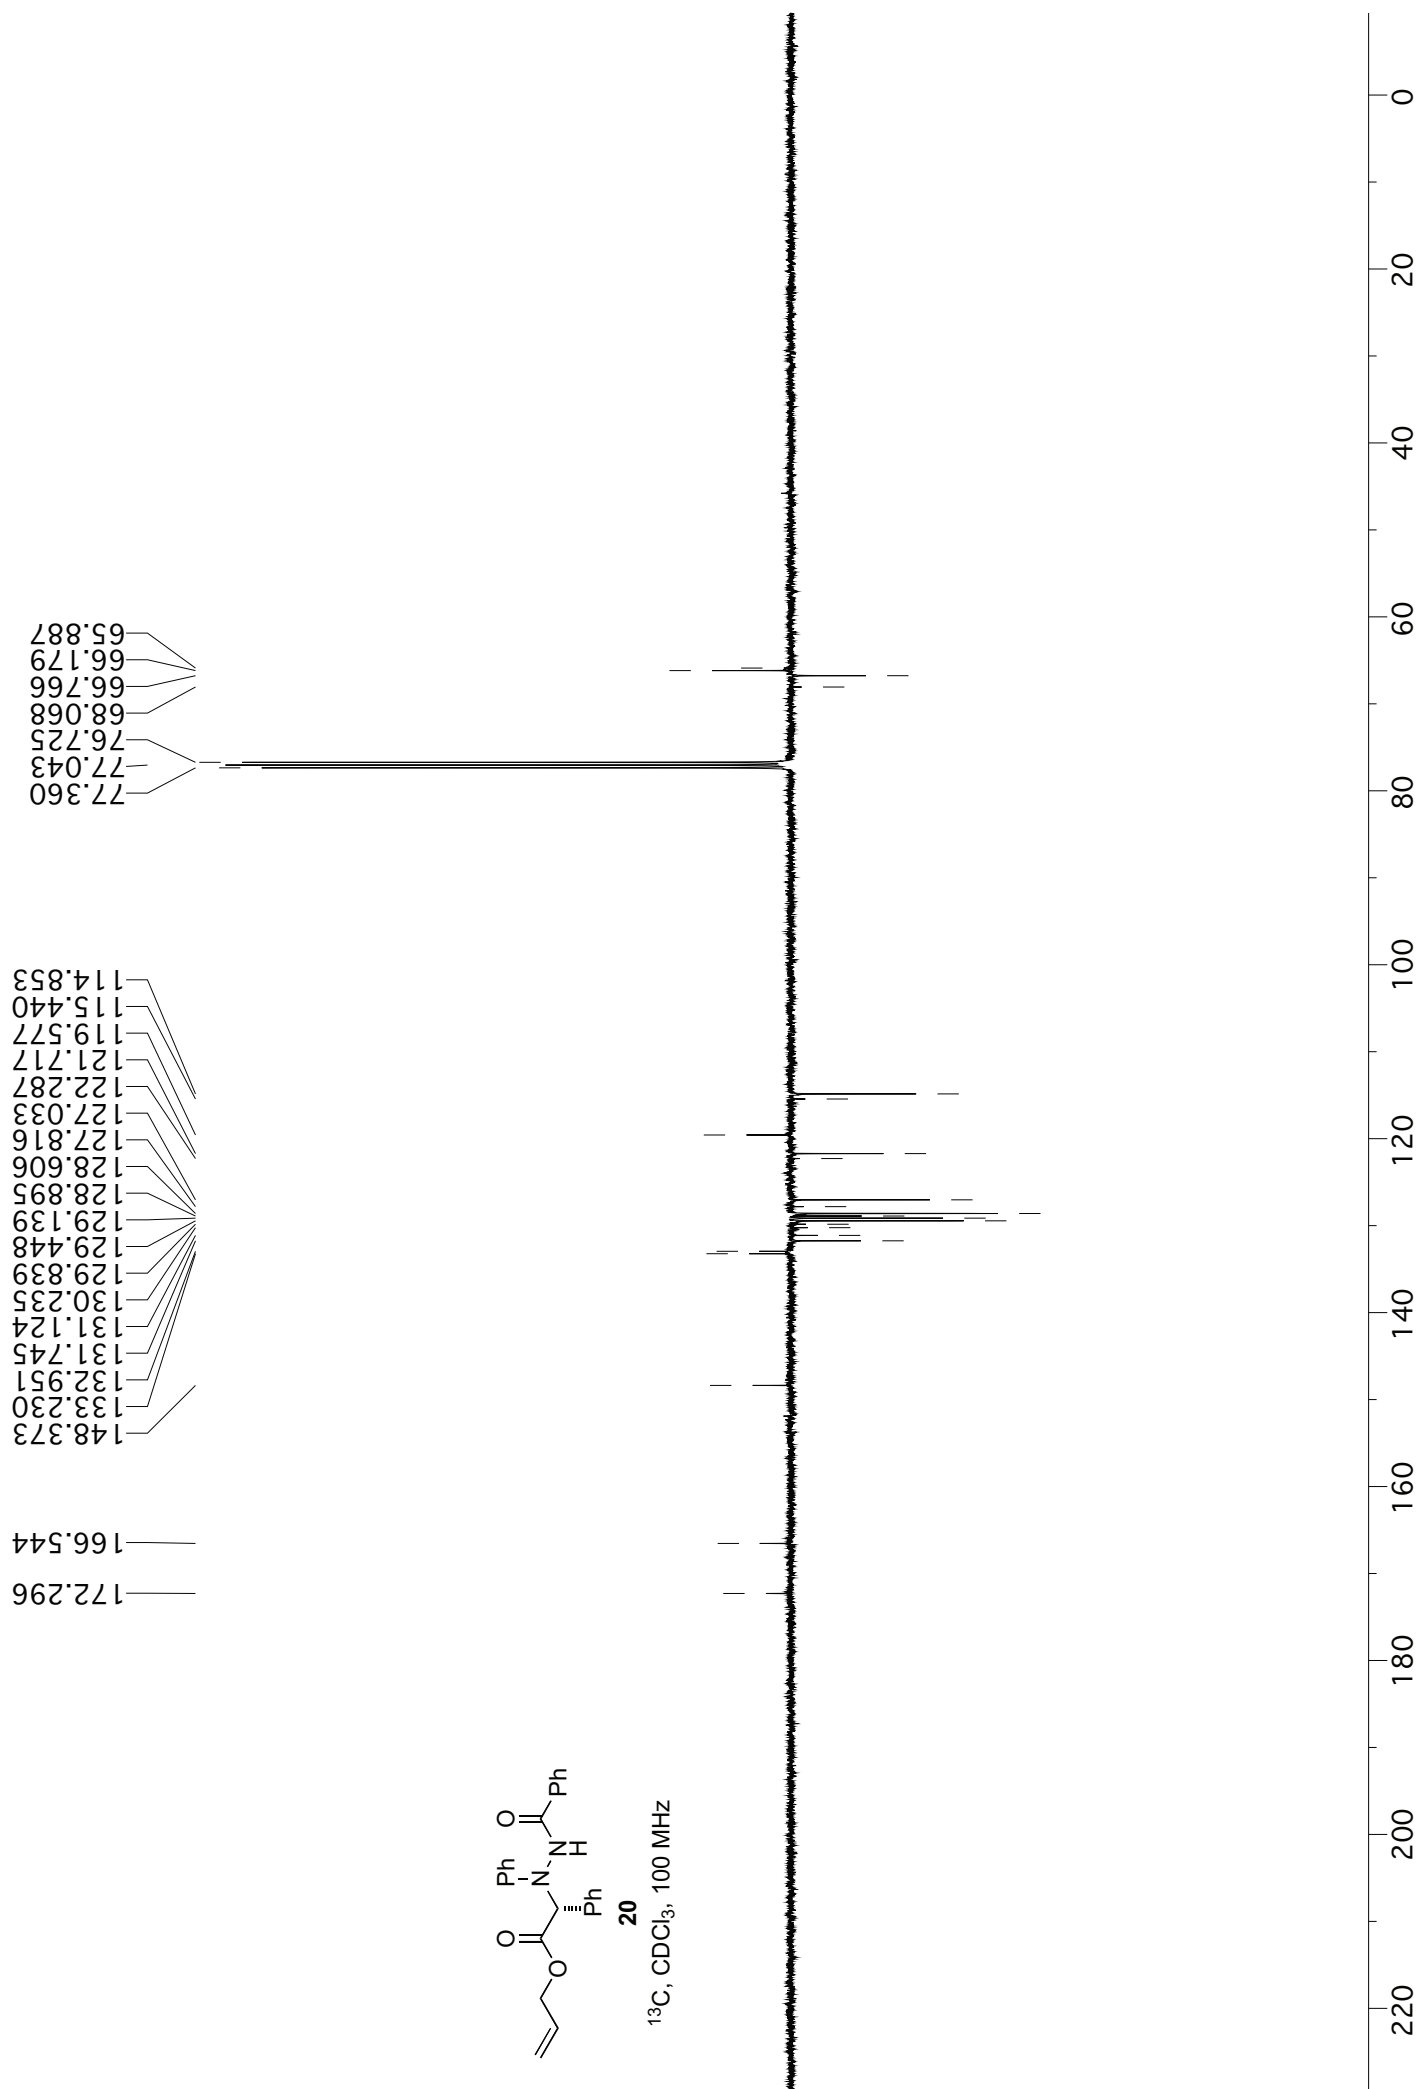

1.258  
1.239  
1.225  
1.210  
1.156  
1.143  
1.049  
1.036

4.154  
4.141  
4.127  
4.114  
4.029  
4.015  
4.002  
3.989  
3.987  
3.973  
3.960

5.285

7.589  
7.510  
7.495  
7.481  
7.352  
7.337  
7.321  
7.313  
7.298  
7.280  
7.214  
7.201  
6.970  
6.955  
6.941  
6.853  
6.840

9.380

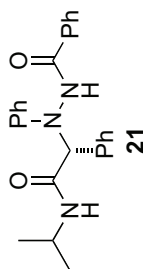

<sup>1</sup>H, CDCl<sub>3</sub>, 500 MHz

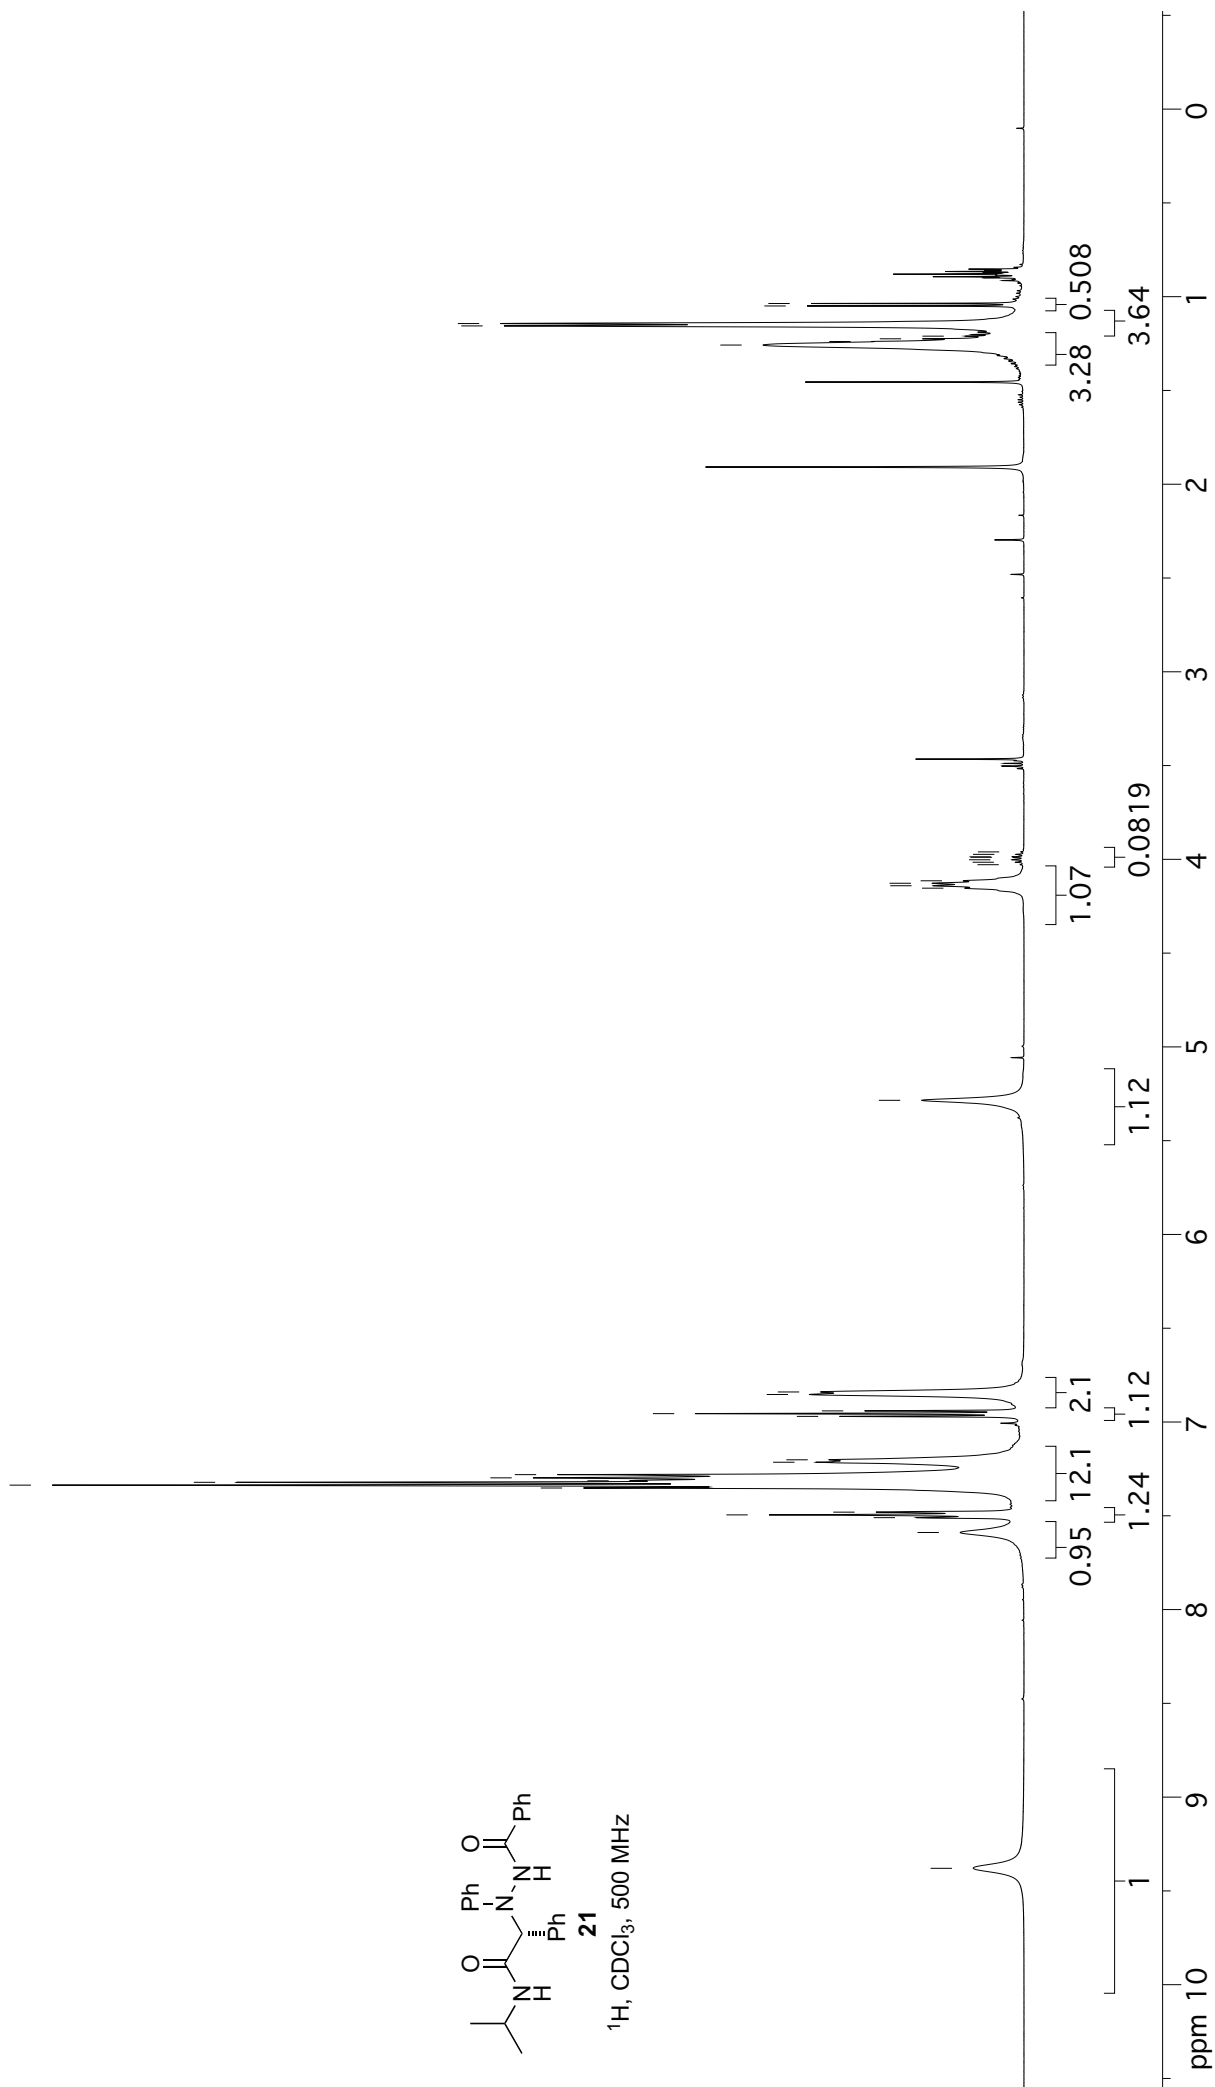

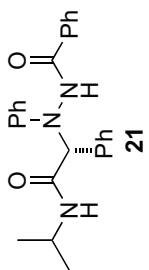

$^{13}\text{C}$ ,  $\text{CDCl}_3$ , 100 MHz

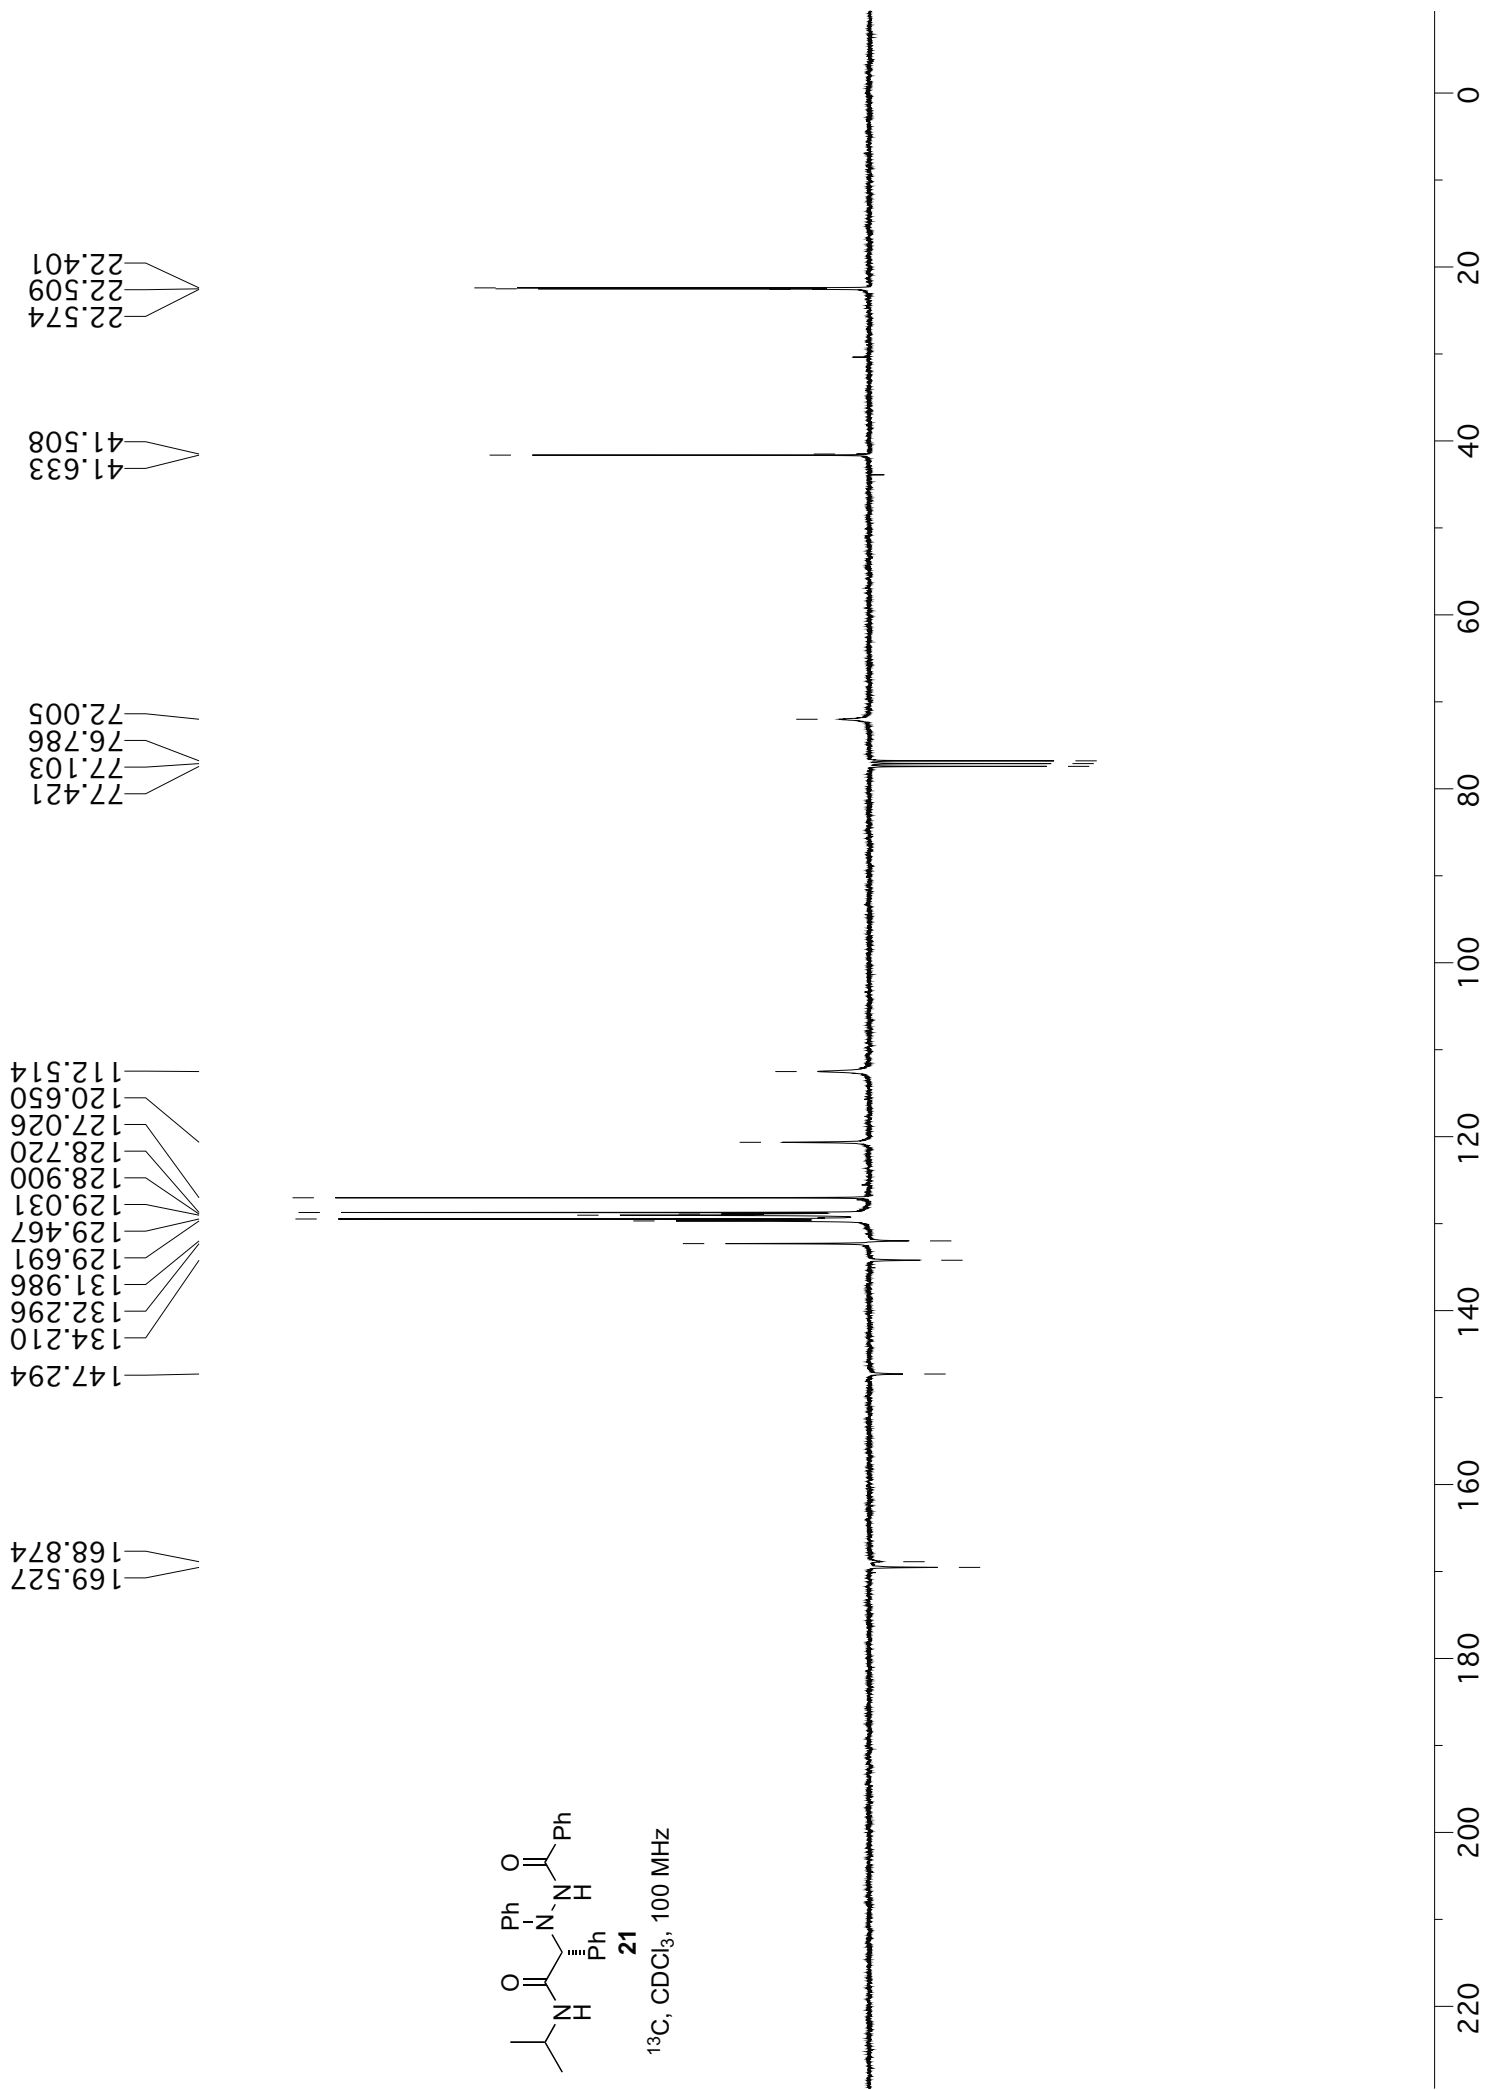

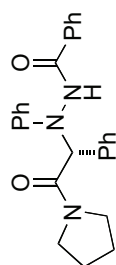

**22**

<sup>1</sup>H, CDCl<sub>3</sub>, 500 MHz

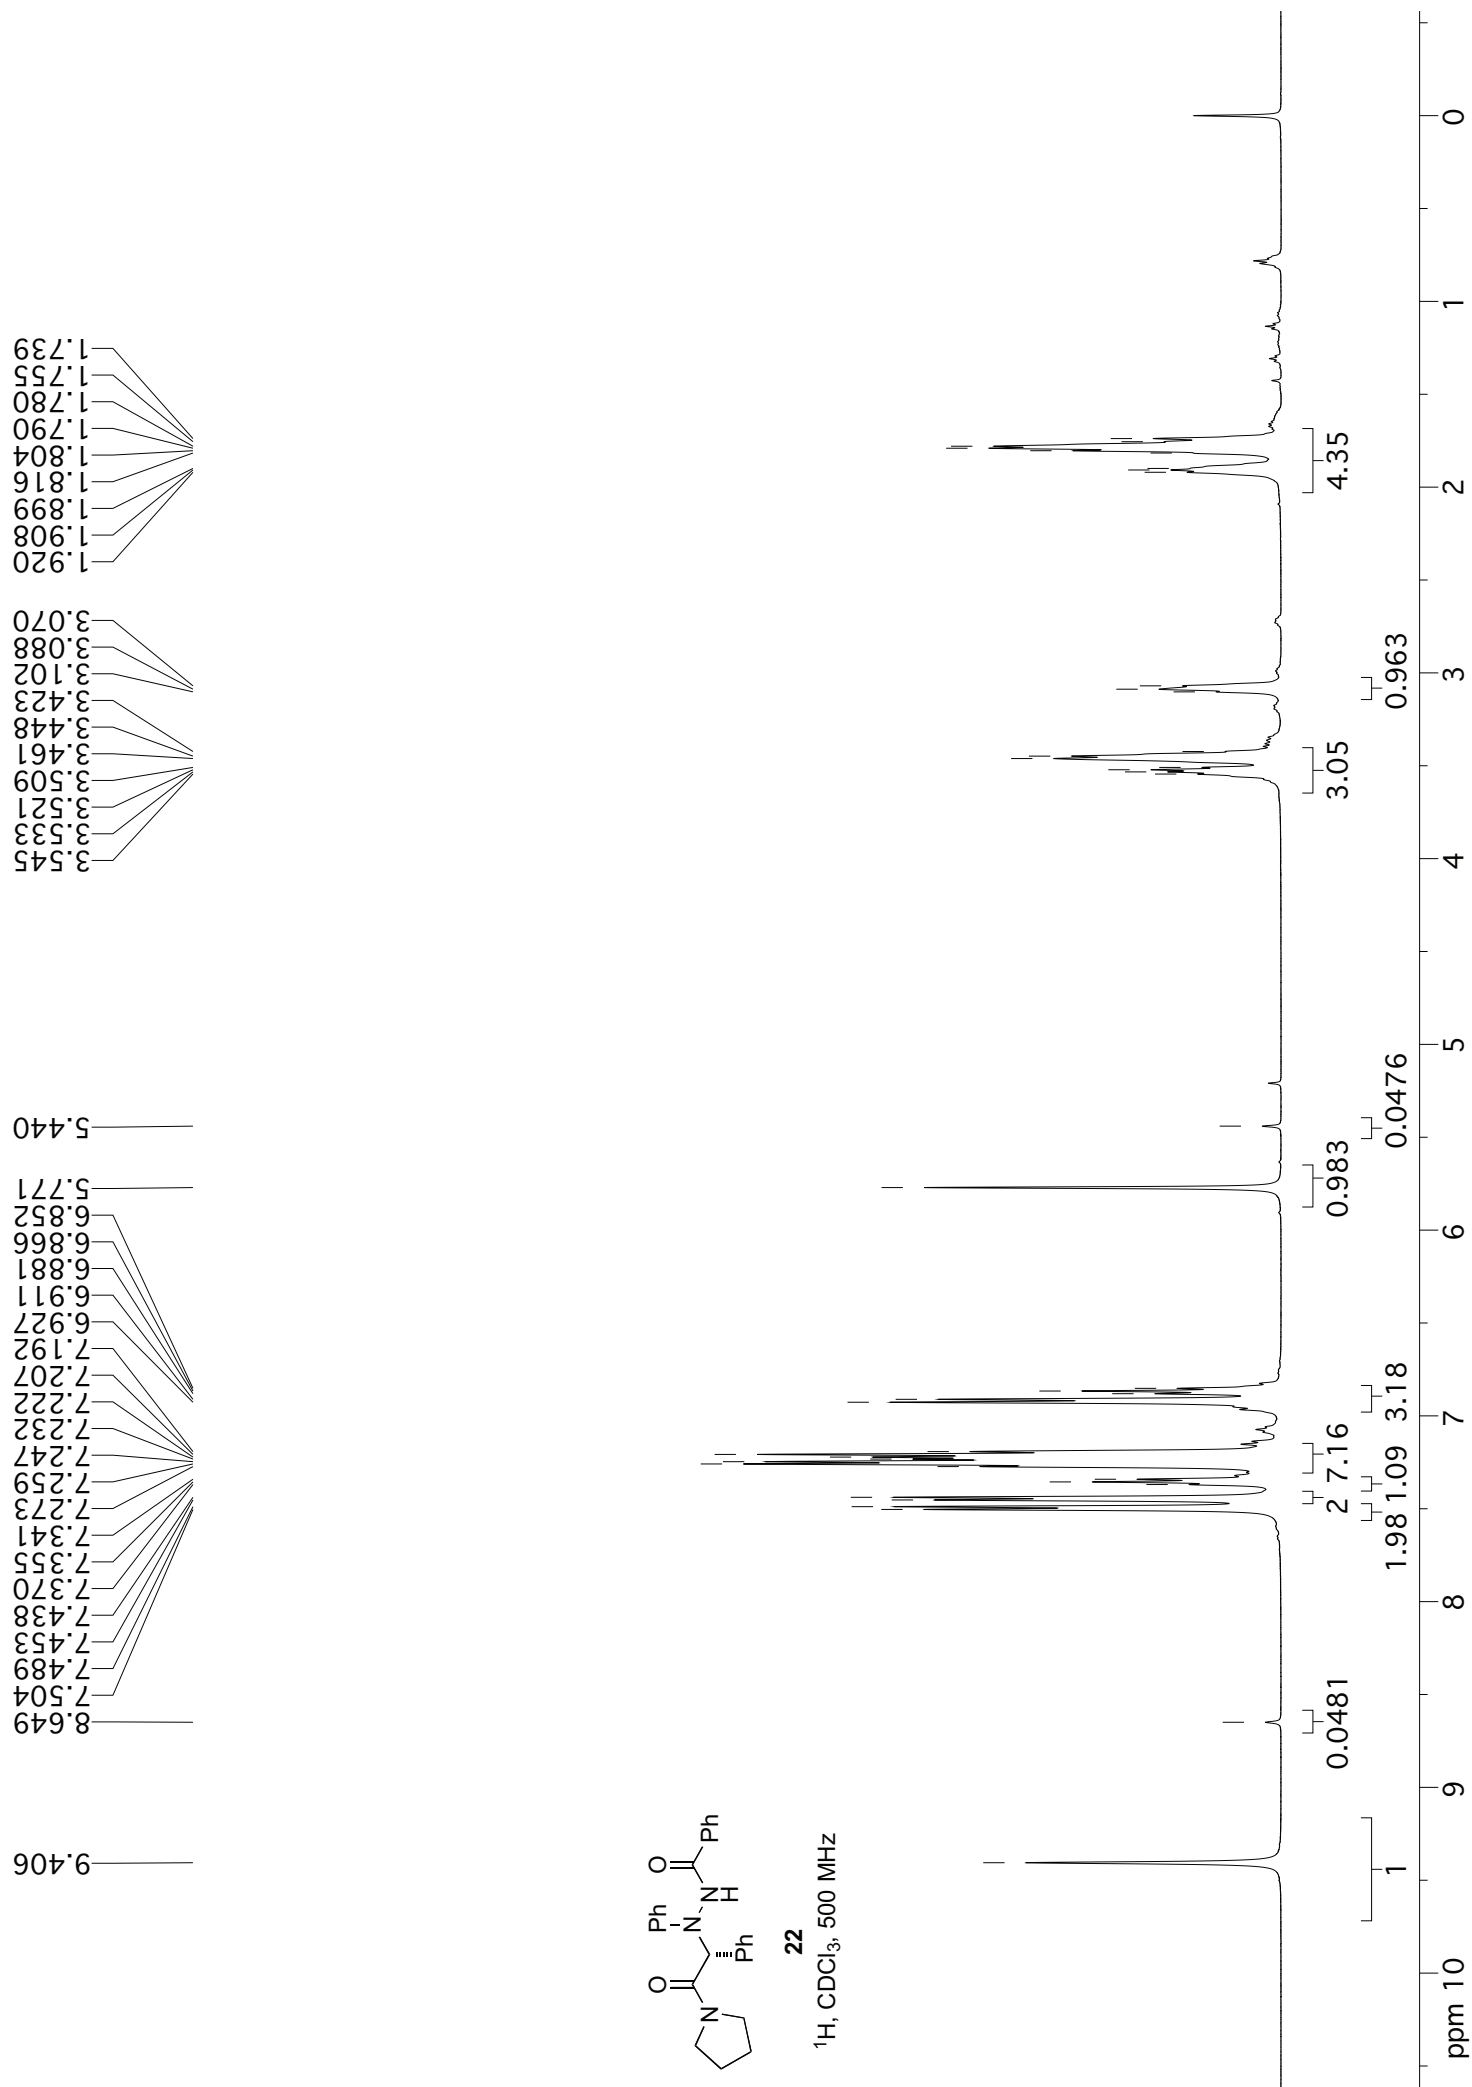

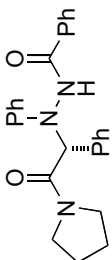

**22**

<sup>13</sup>C, CDCl<sub>3</sub>, 100 MHz

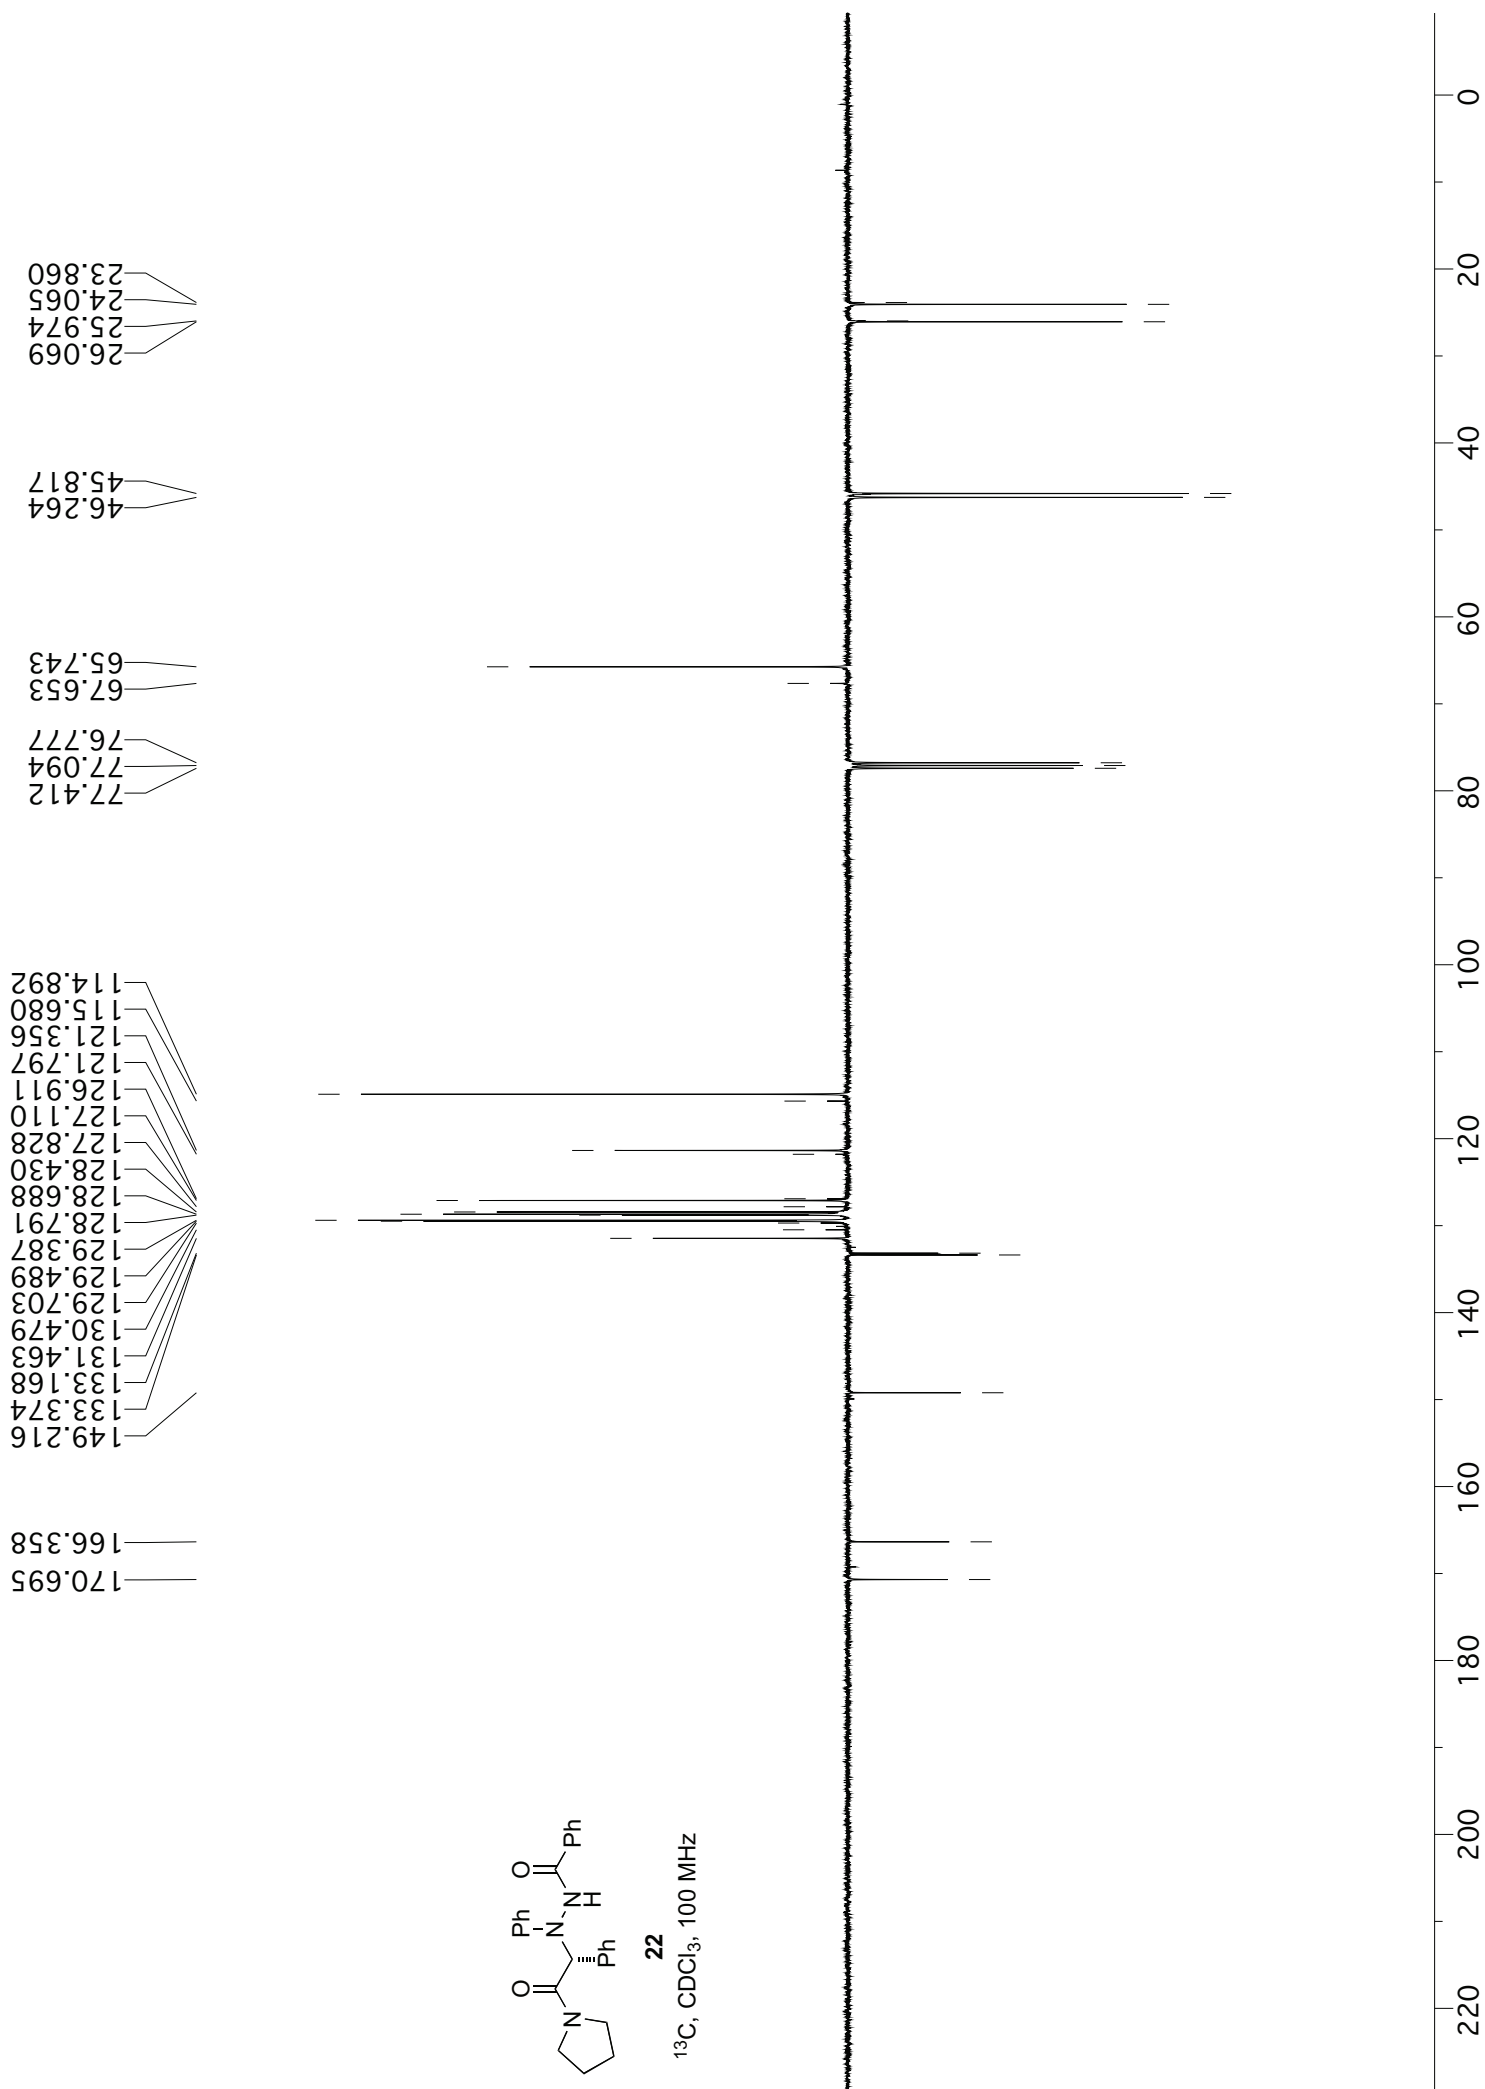



8.431  
7.854  
7.516  
7.509  
7.505  
7.500  
7.489  
7.482  
7.477  
7.423  
7.419  
7.414  
7.402  
7.394  
7.387  
7.374  
7.370  
7.365  
7.360  
7.335  
7.328  
7.317  
7.311  
7.295  
7.289  
7.278  
7.273  
7.267  
7.263  
7.240  
7.233  
7.223  
7.216  
7.211  
7.203  
7.193  
7.186  
7.176  
6.948  
6.945  
6.918  
6.916  
6.908  
6.905  
6.902  
6.881  
6.859  
6.856  
6.853  
6.788  
6.778  
6.771  
6.756  
6.749  
6.588  
6.581  
6.566  
6.559  
5.751  
5.450  
3.707  
3.657  
3.601

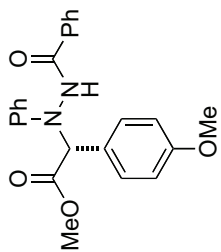

$^1\text{H}$ ,  $\text{CDCl}_3$ , 300 MHz

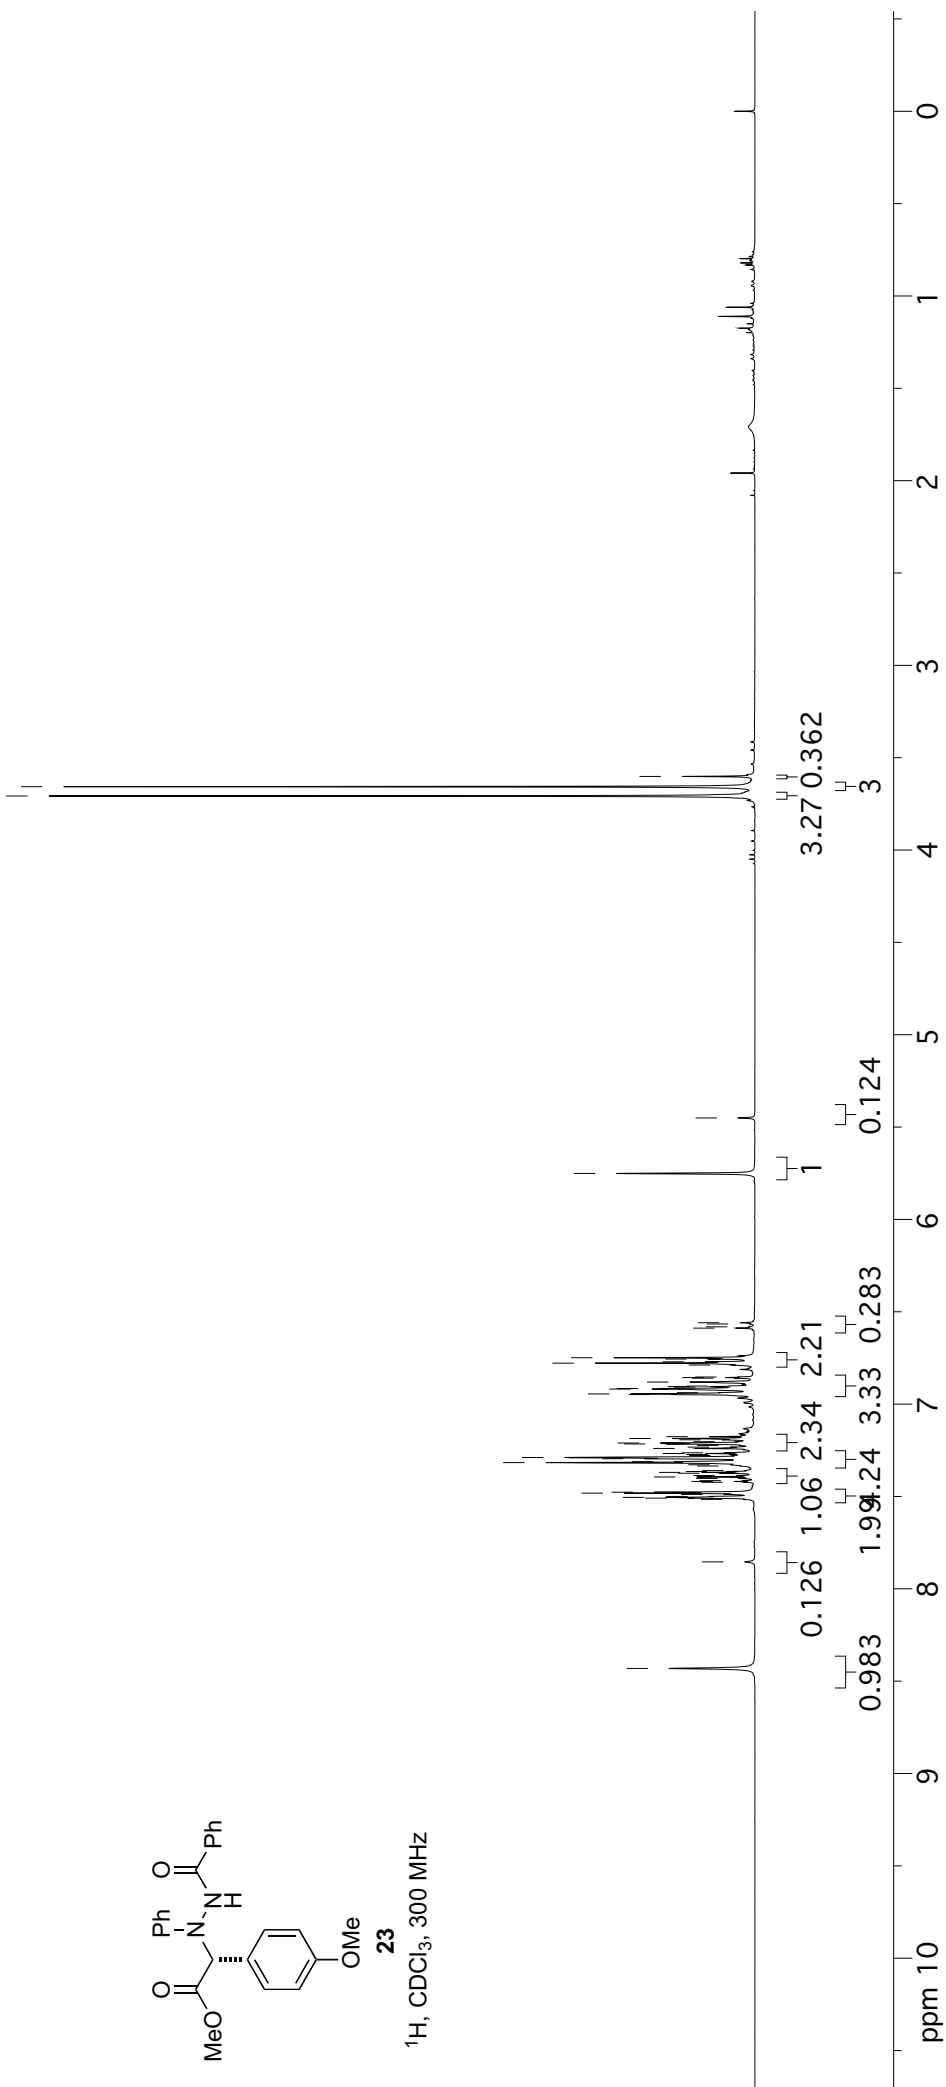

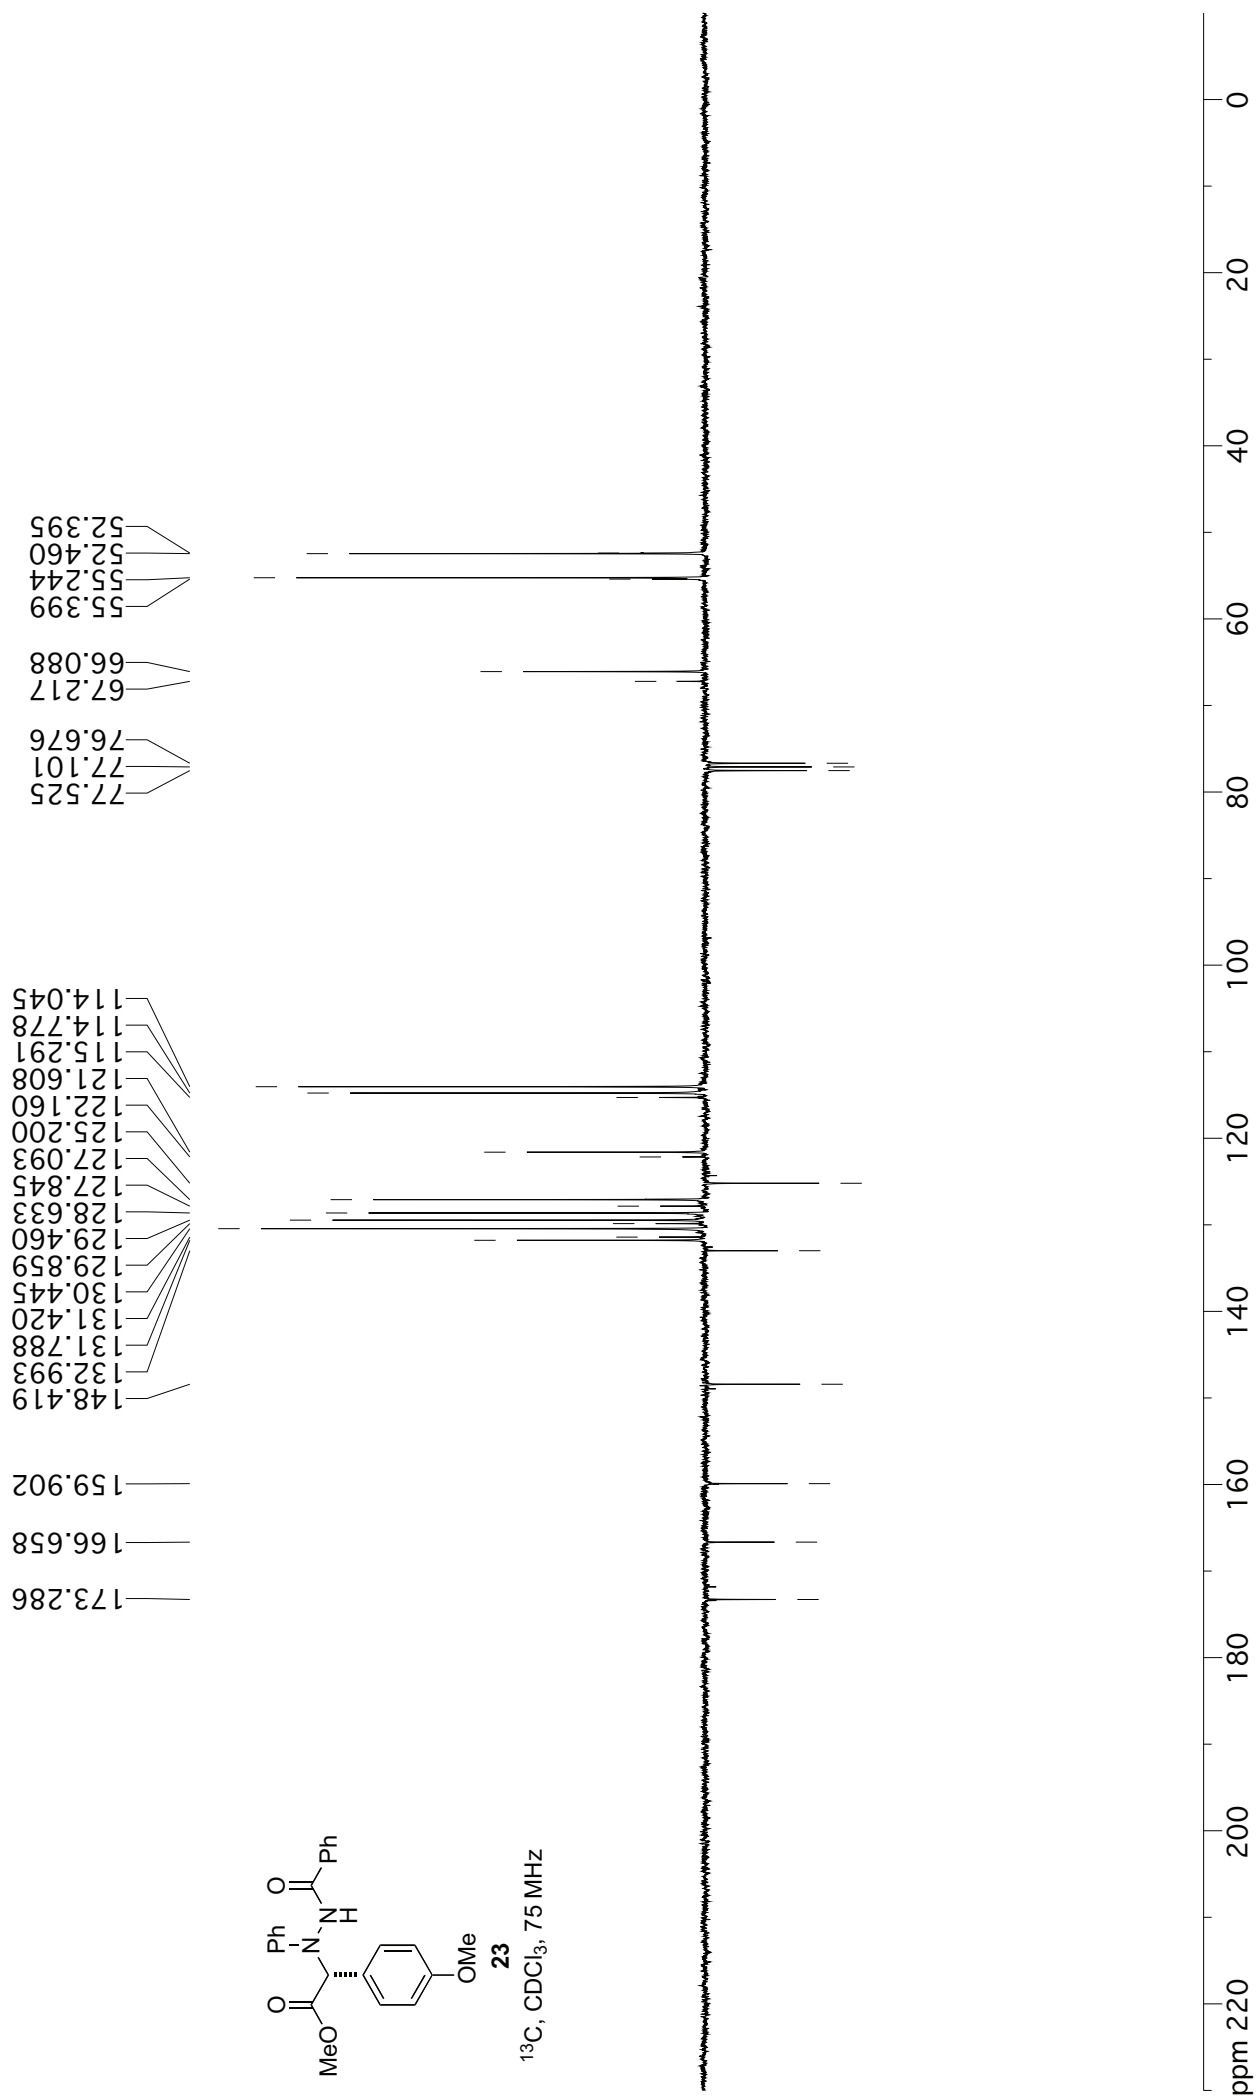

8.468  
7.886  
7.515  
7.502  
7.497  
7.494  
7.422  
7.419  
7.416  
7.406  
7.401  
7.396  
7.385  
7.382  
7.379  
7.379  
7.329  
7.319  
7.316  
7.300  
7.282  
7.279  
7.276  
7.233  
7.228  
7.215  
7.211  
7.206  
7.202  
7.193  
7.189  
7.182  
7.176  
7.172  
7.163  
7.160  
6.951  
6.939  
6.919  
6.918  
6.911  
6.905  
6.887  
6.868  
6.576  
6.572  
6.563  
6.560  
5.827  
5.561  
3.724  
3.591

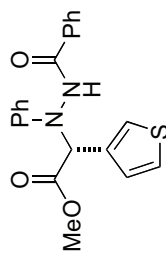

<sup>1</sup>H, CDCl<sub>3</sub>, 400 MHz

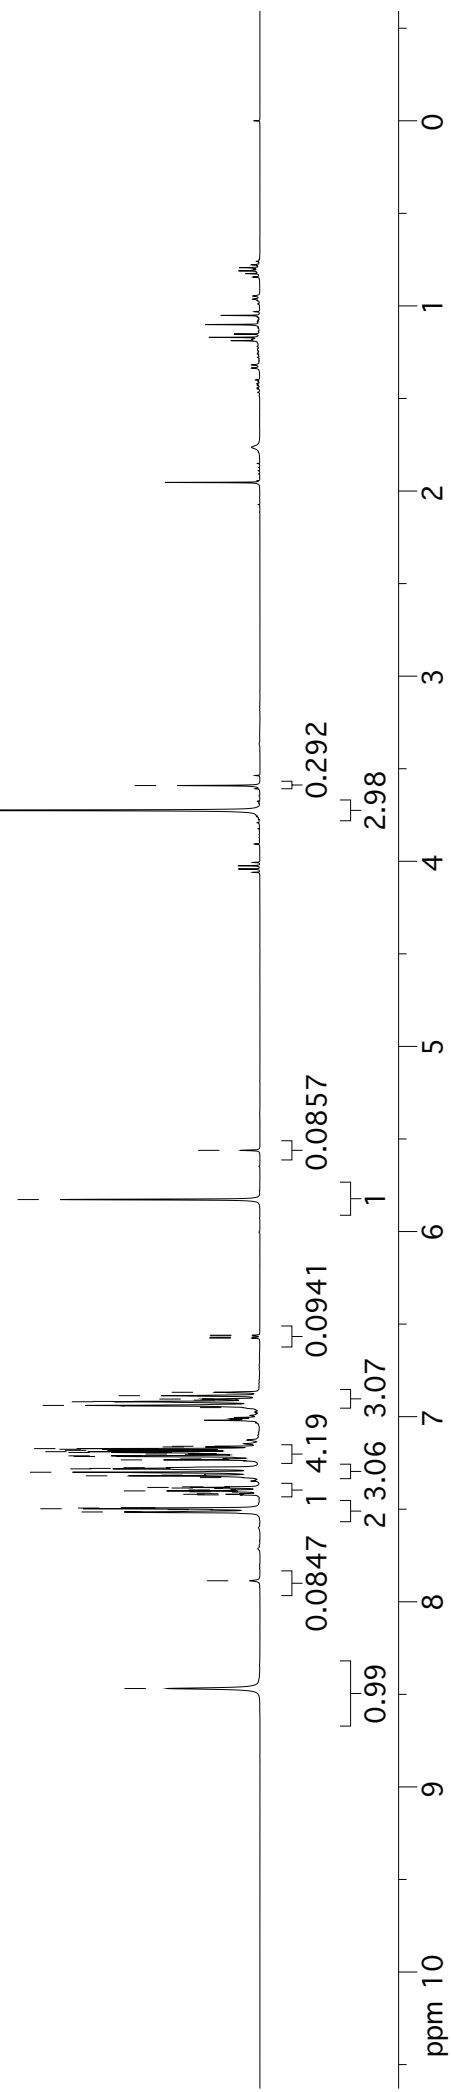

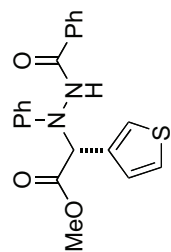

**24**

$^{13}\text{C}$ ,  $\text{CDCl}_3$ , 75 MHz

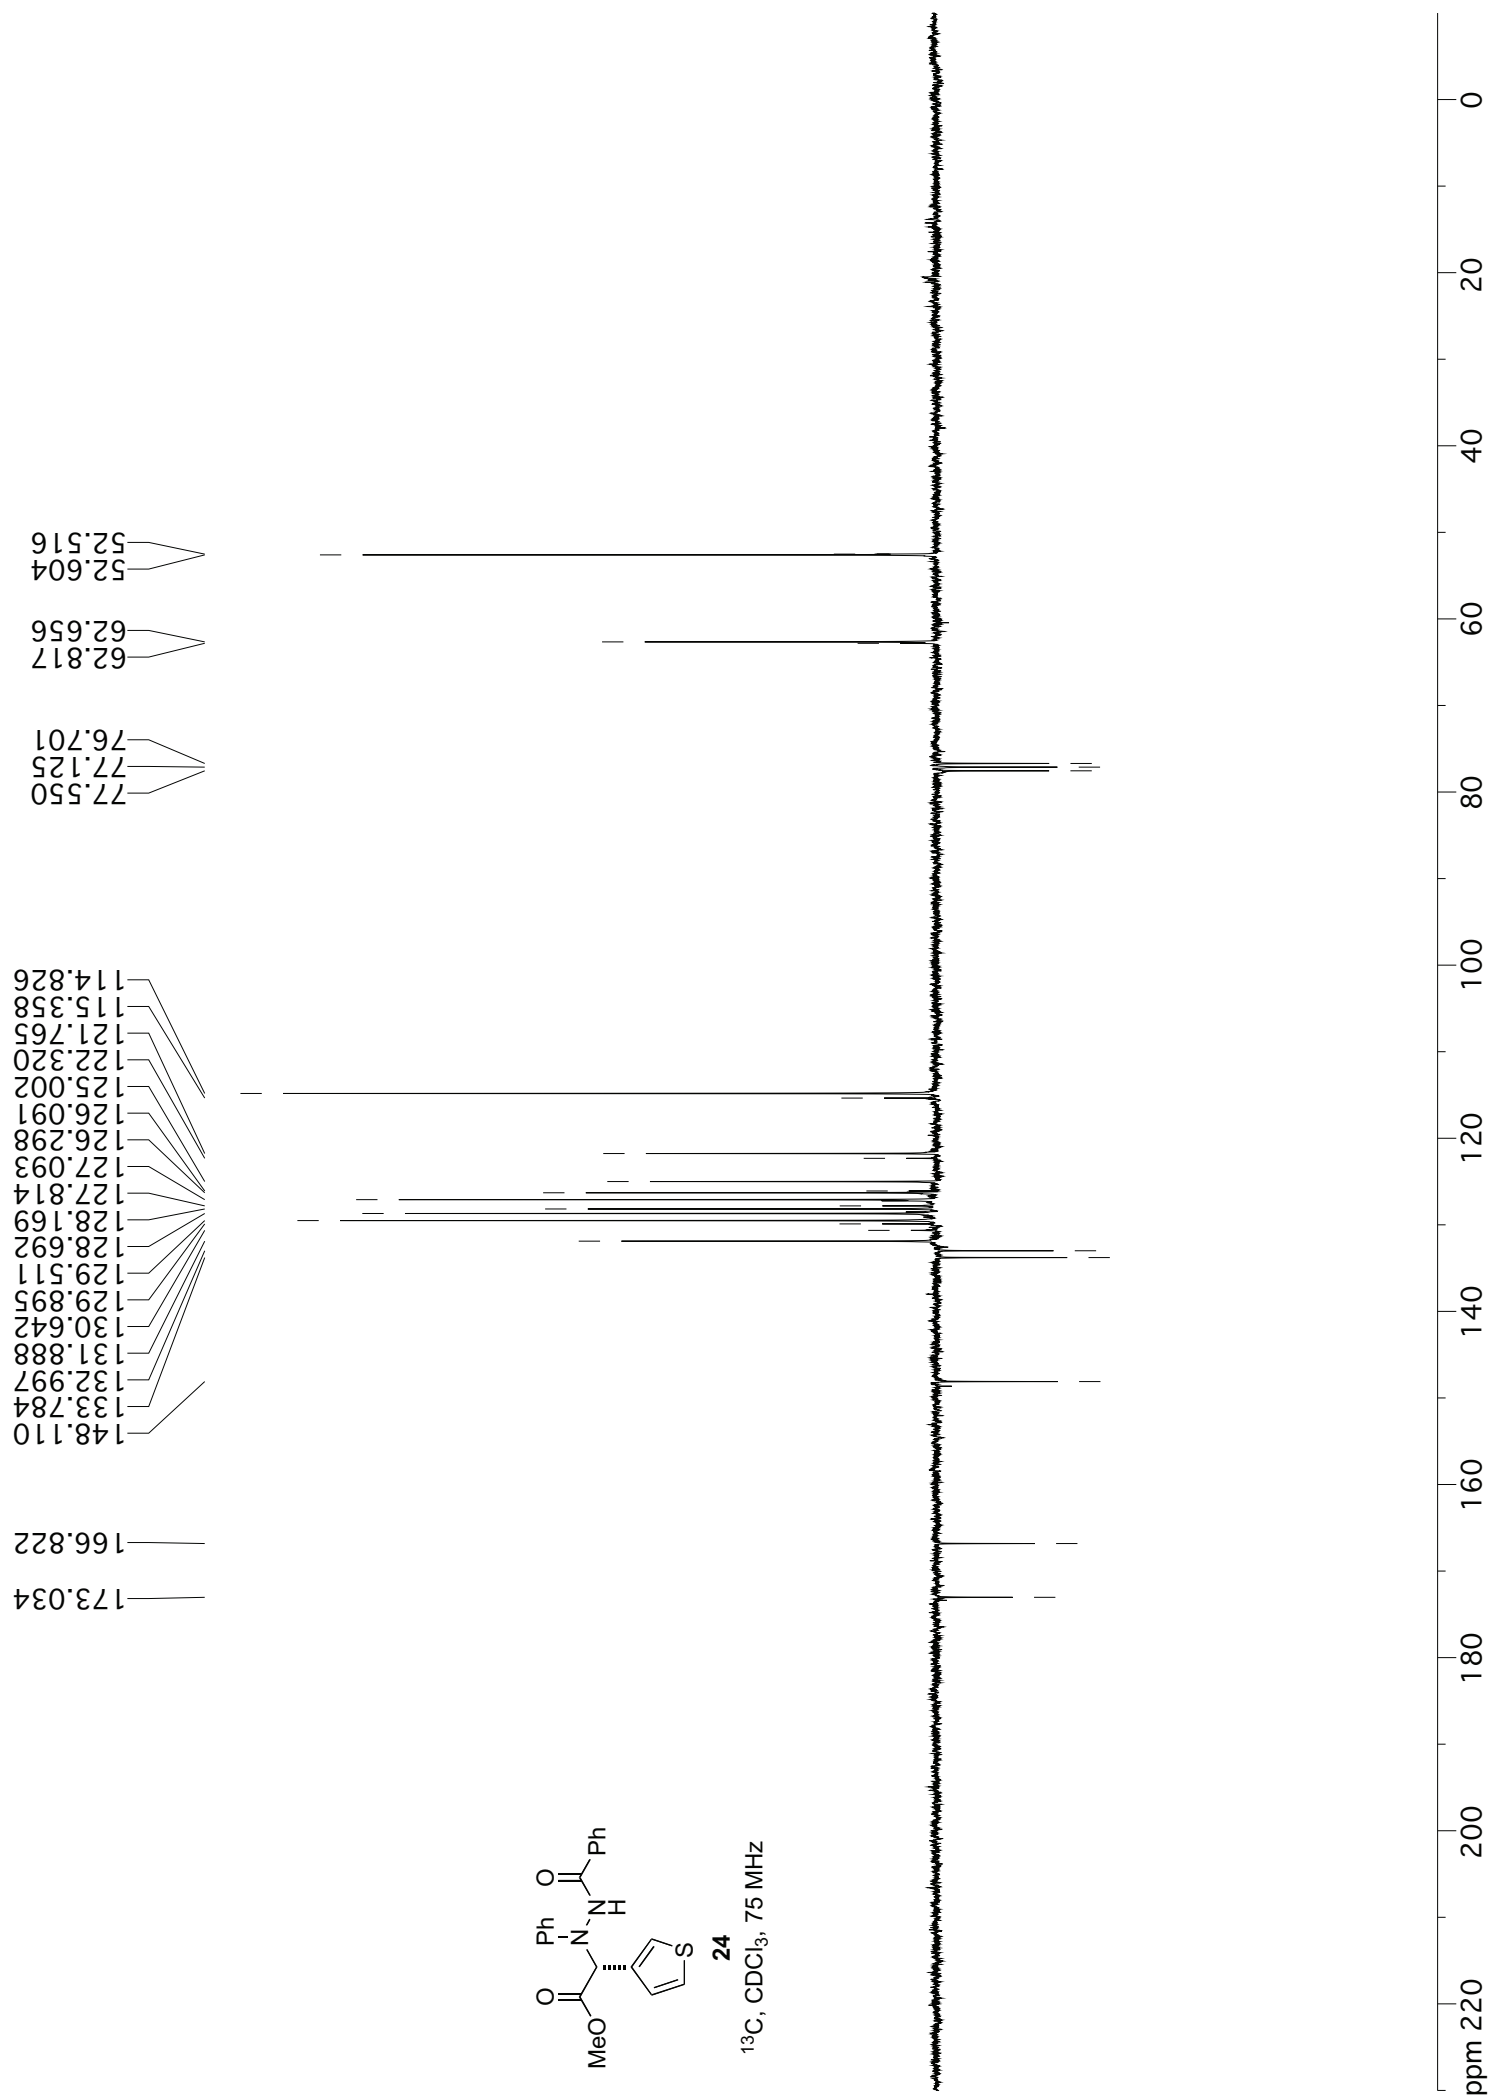

8.400  
7.842  
7.394  
7.390  
7.385  
7.377  
7.372  
7.361  
7.357  
7.265  
7.259  
7.254  
7.250  
7.243  
7.239  
7.236  
7.233  
7.229  
7.225  
7.222  
7.217  
7.214  
7.211  
7.206  
7.204  
7.197  
7.192  
7.187  
7.089  
7.069  
6.946  
6.943  
6.938  
6.926  
6.923  
6.921  
6.915  
6.902  
6.900  
6.882  
6.866  
6.863  
6.861  
6.798  
6.782  
6.777  
6.762  
6.741  
5.804  
5.511  
3.725  
3.611  
2.278  
2.182

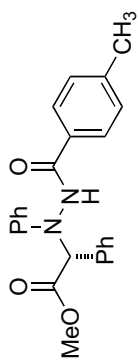

**25**

<sup>1</sup>H, CDCl<sub>3</sub>, 400 MHz

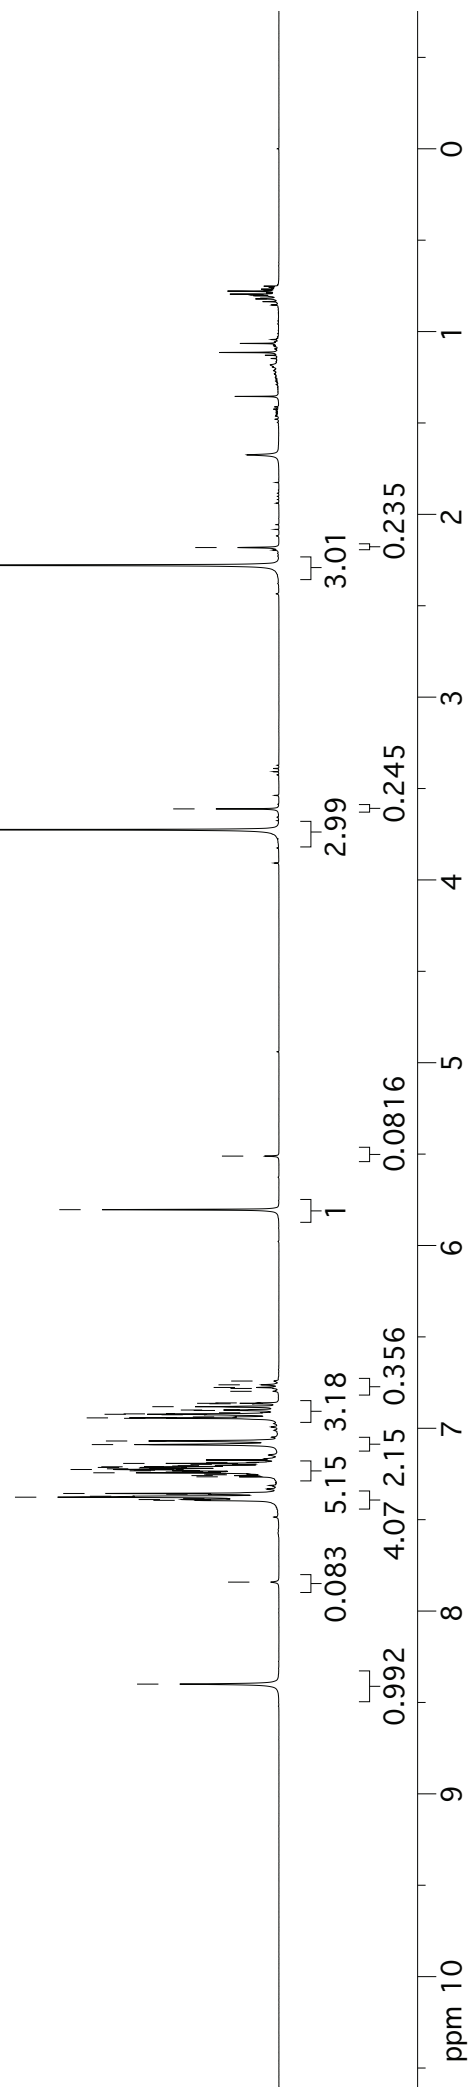

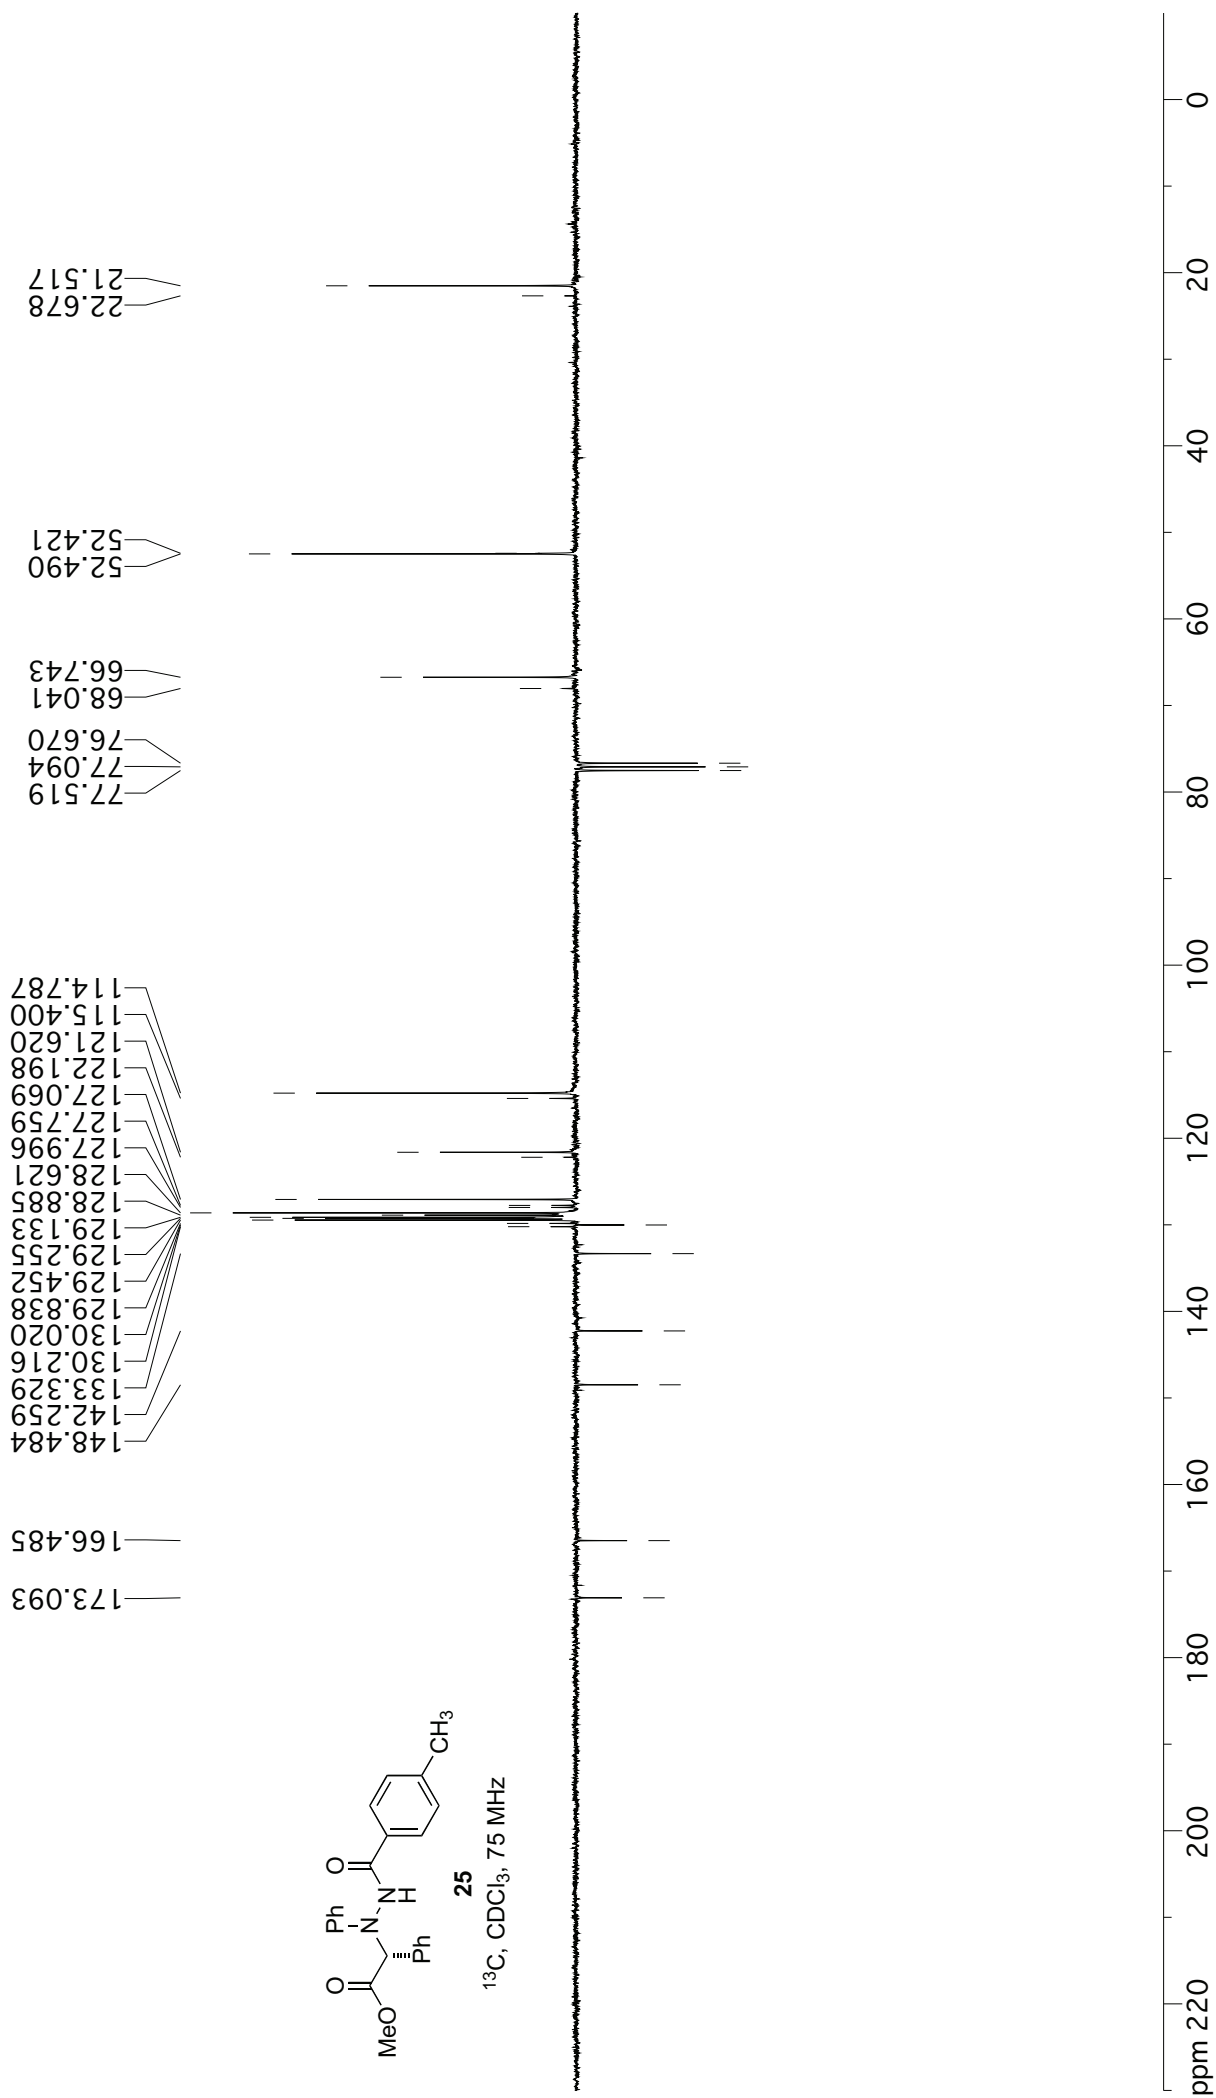

8.671  
7.816  
7.380  
7.370  
7.366  
7.354  
7.348  
7.337  
7.262  
7.243  
7.239  
7.231  
7.224  
7.214  
7.208  
7.192  
7.185  
7.176  
7.150  
7.139  
6.962  
6.959  
6.933  
6.929  
6.916  
6.914  
6.887  
6.863  
6.368  
6.362  
6.357  
6.351  
6.148  
6.143  
6.137  
6.131  
5.767  
5.650  
3.720  
3.652

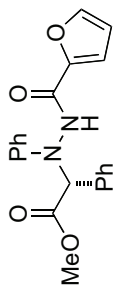

<sup>1</sup>H, CDCl<sub>3</sub>, 300 MHz

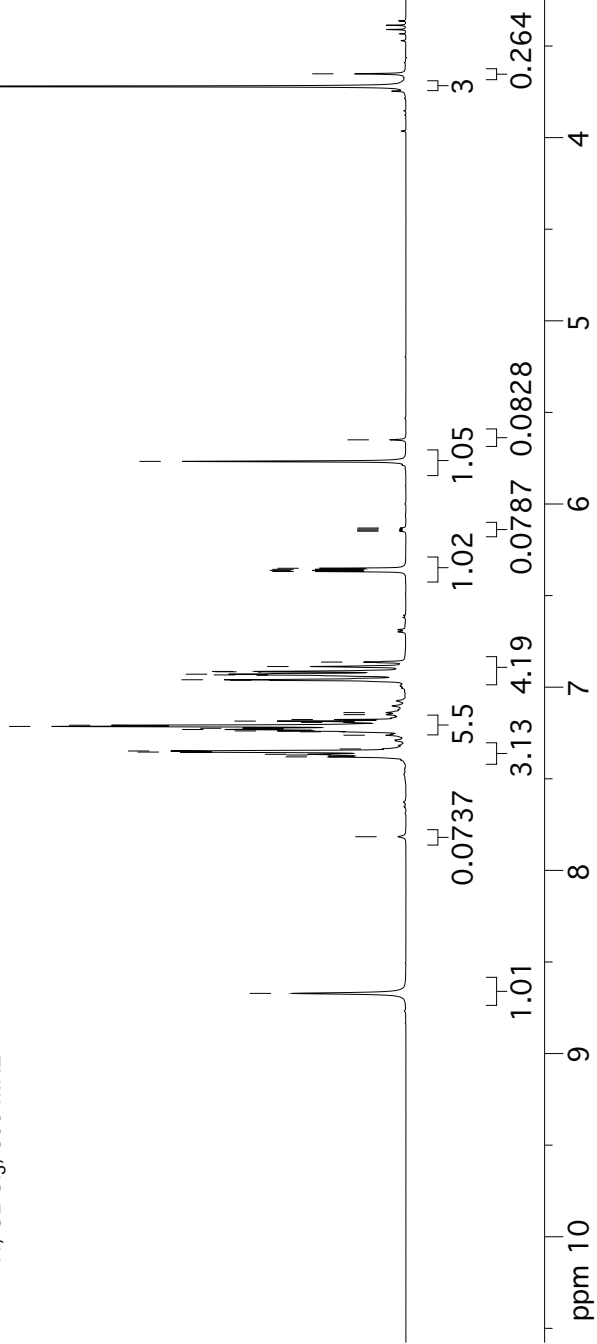

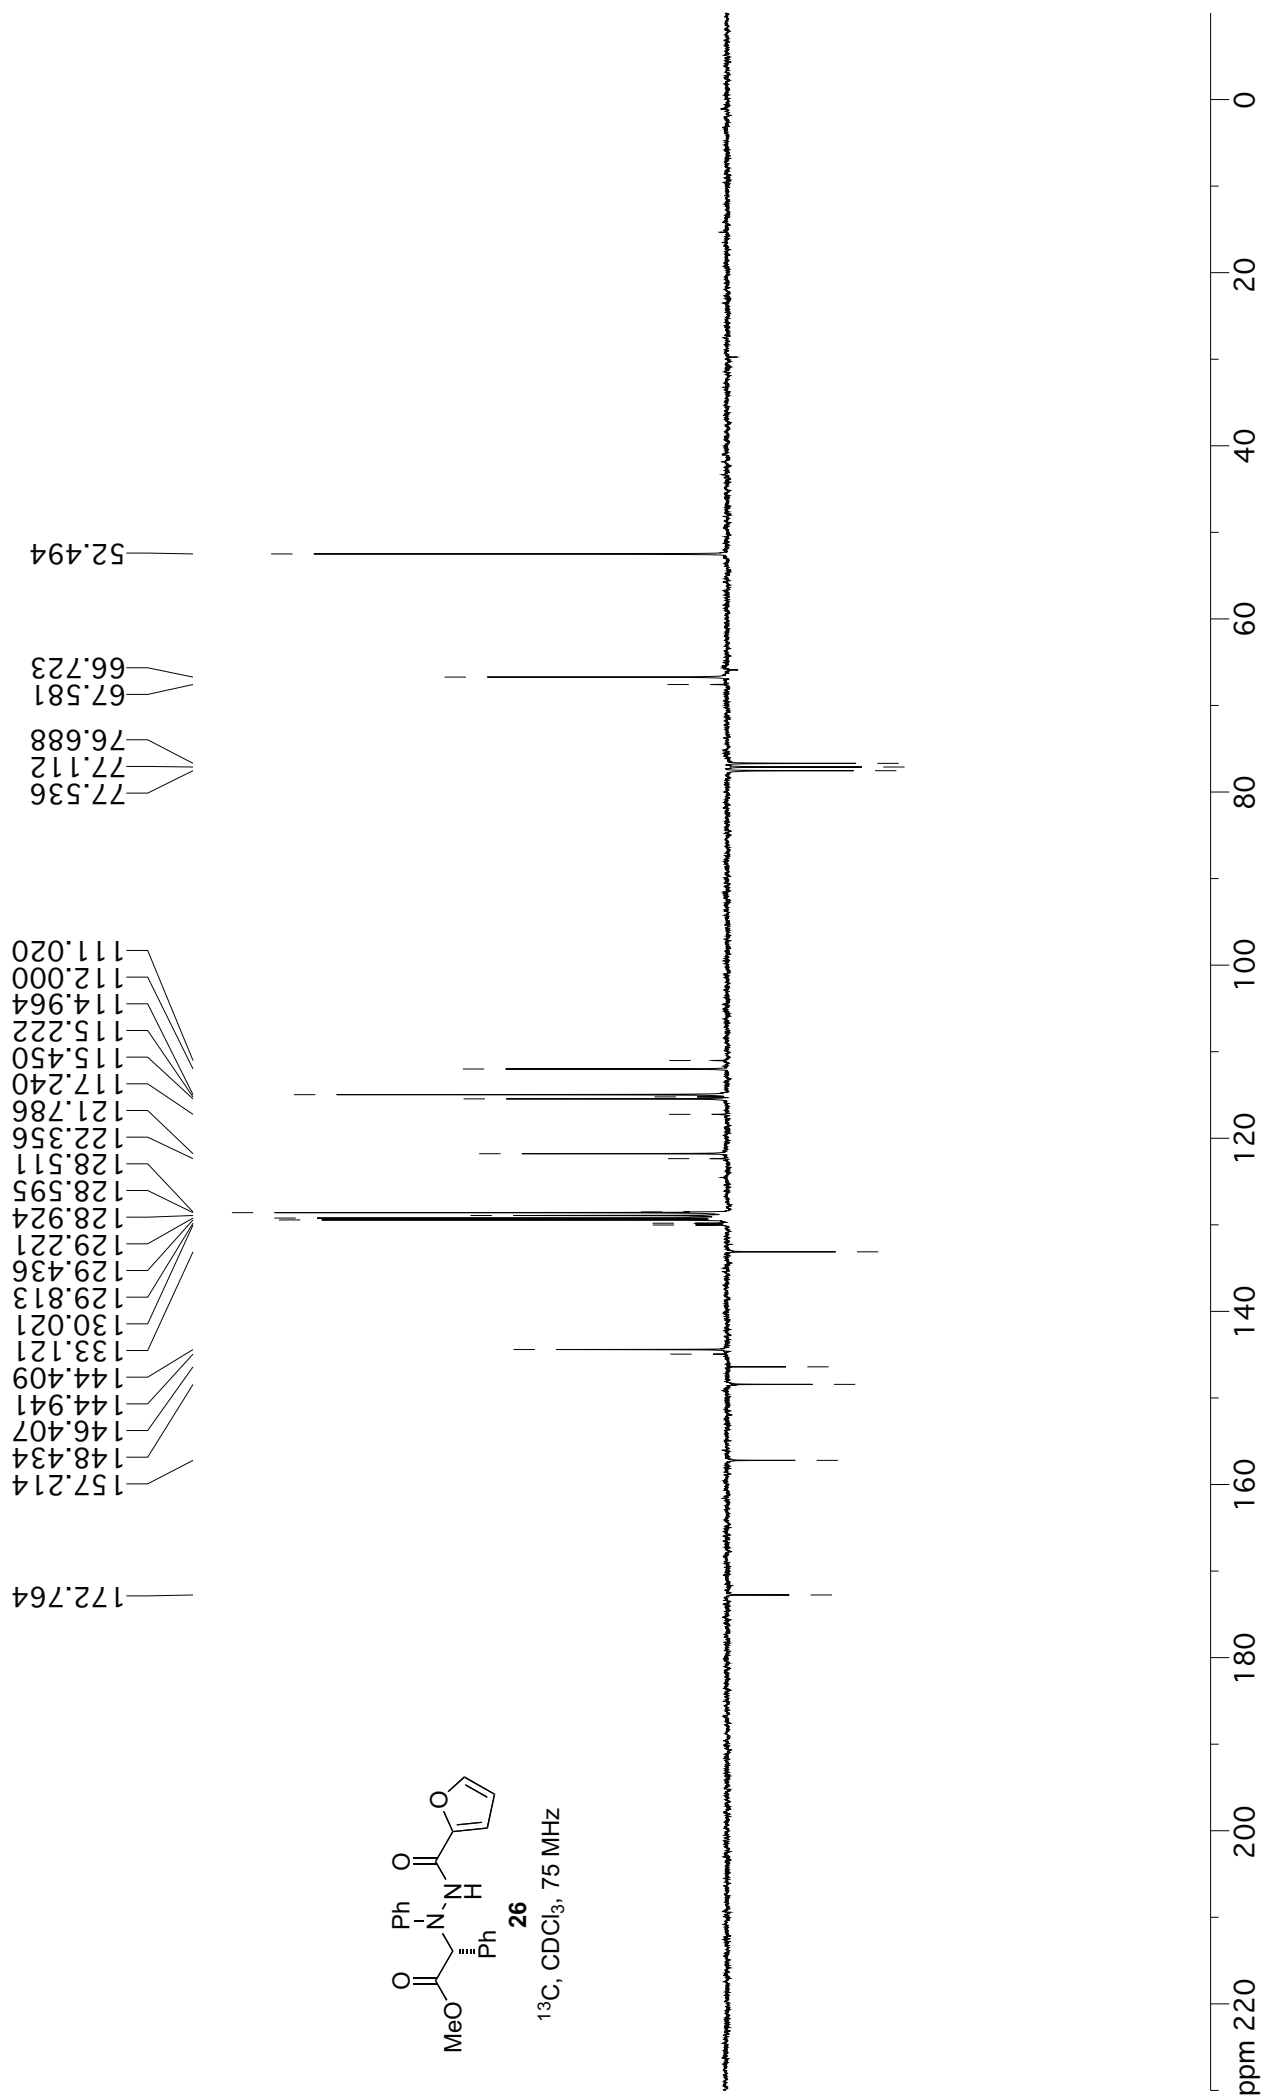



8.622  
8.156  
8.125  
8.119  
8.103  
8.096  
7.800  
7.793  
7.777  
7.770  
7.584  
7.577  
7.561  
7.554  
7.391  
7.383  
7.367  
7.362  
7.357  
7.350  
7.338  
7.278  
7.272  
7.266  
7.259  
7.248  
7.242  
7.238  
7.230  
7.221  
7.213  
6.954  
6.950  
6.927  
6.925  
6.913  
6.906  
5.806  
5.459

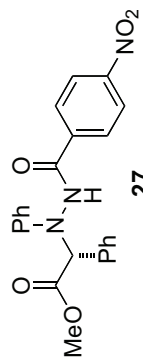

<sup>1</sup>H, CDCl<sub>3</sub>, 300 MHz

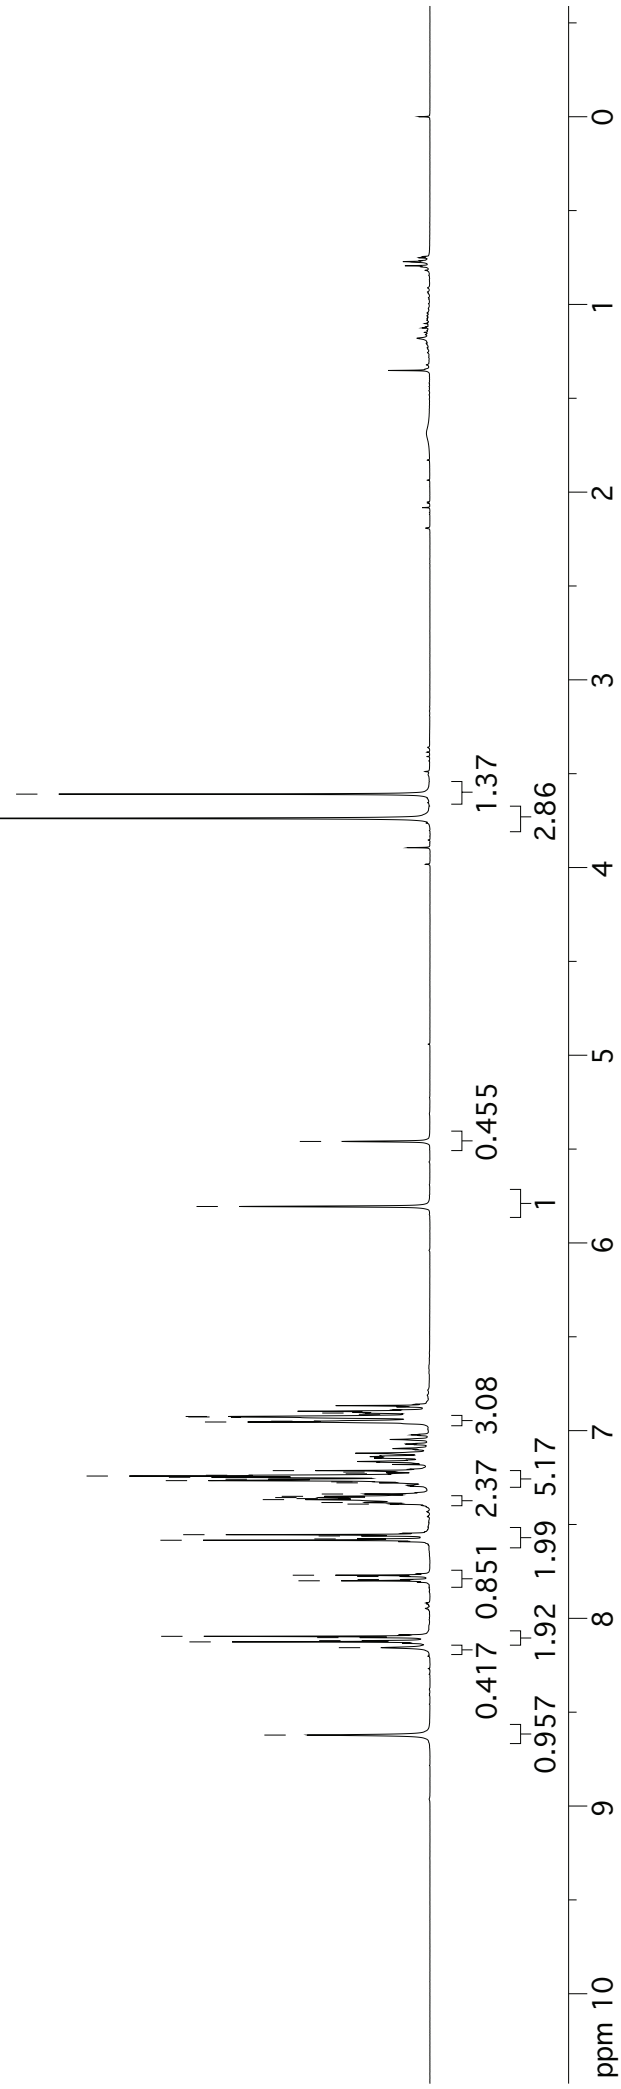

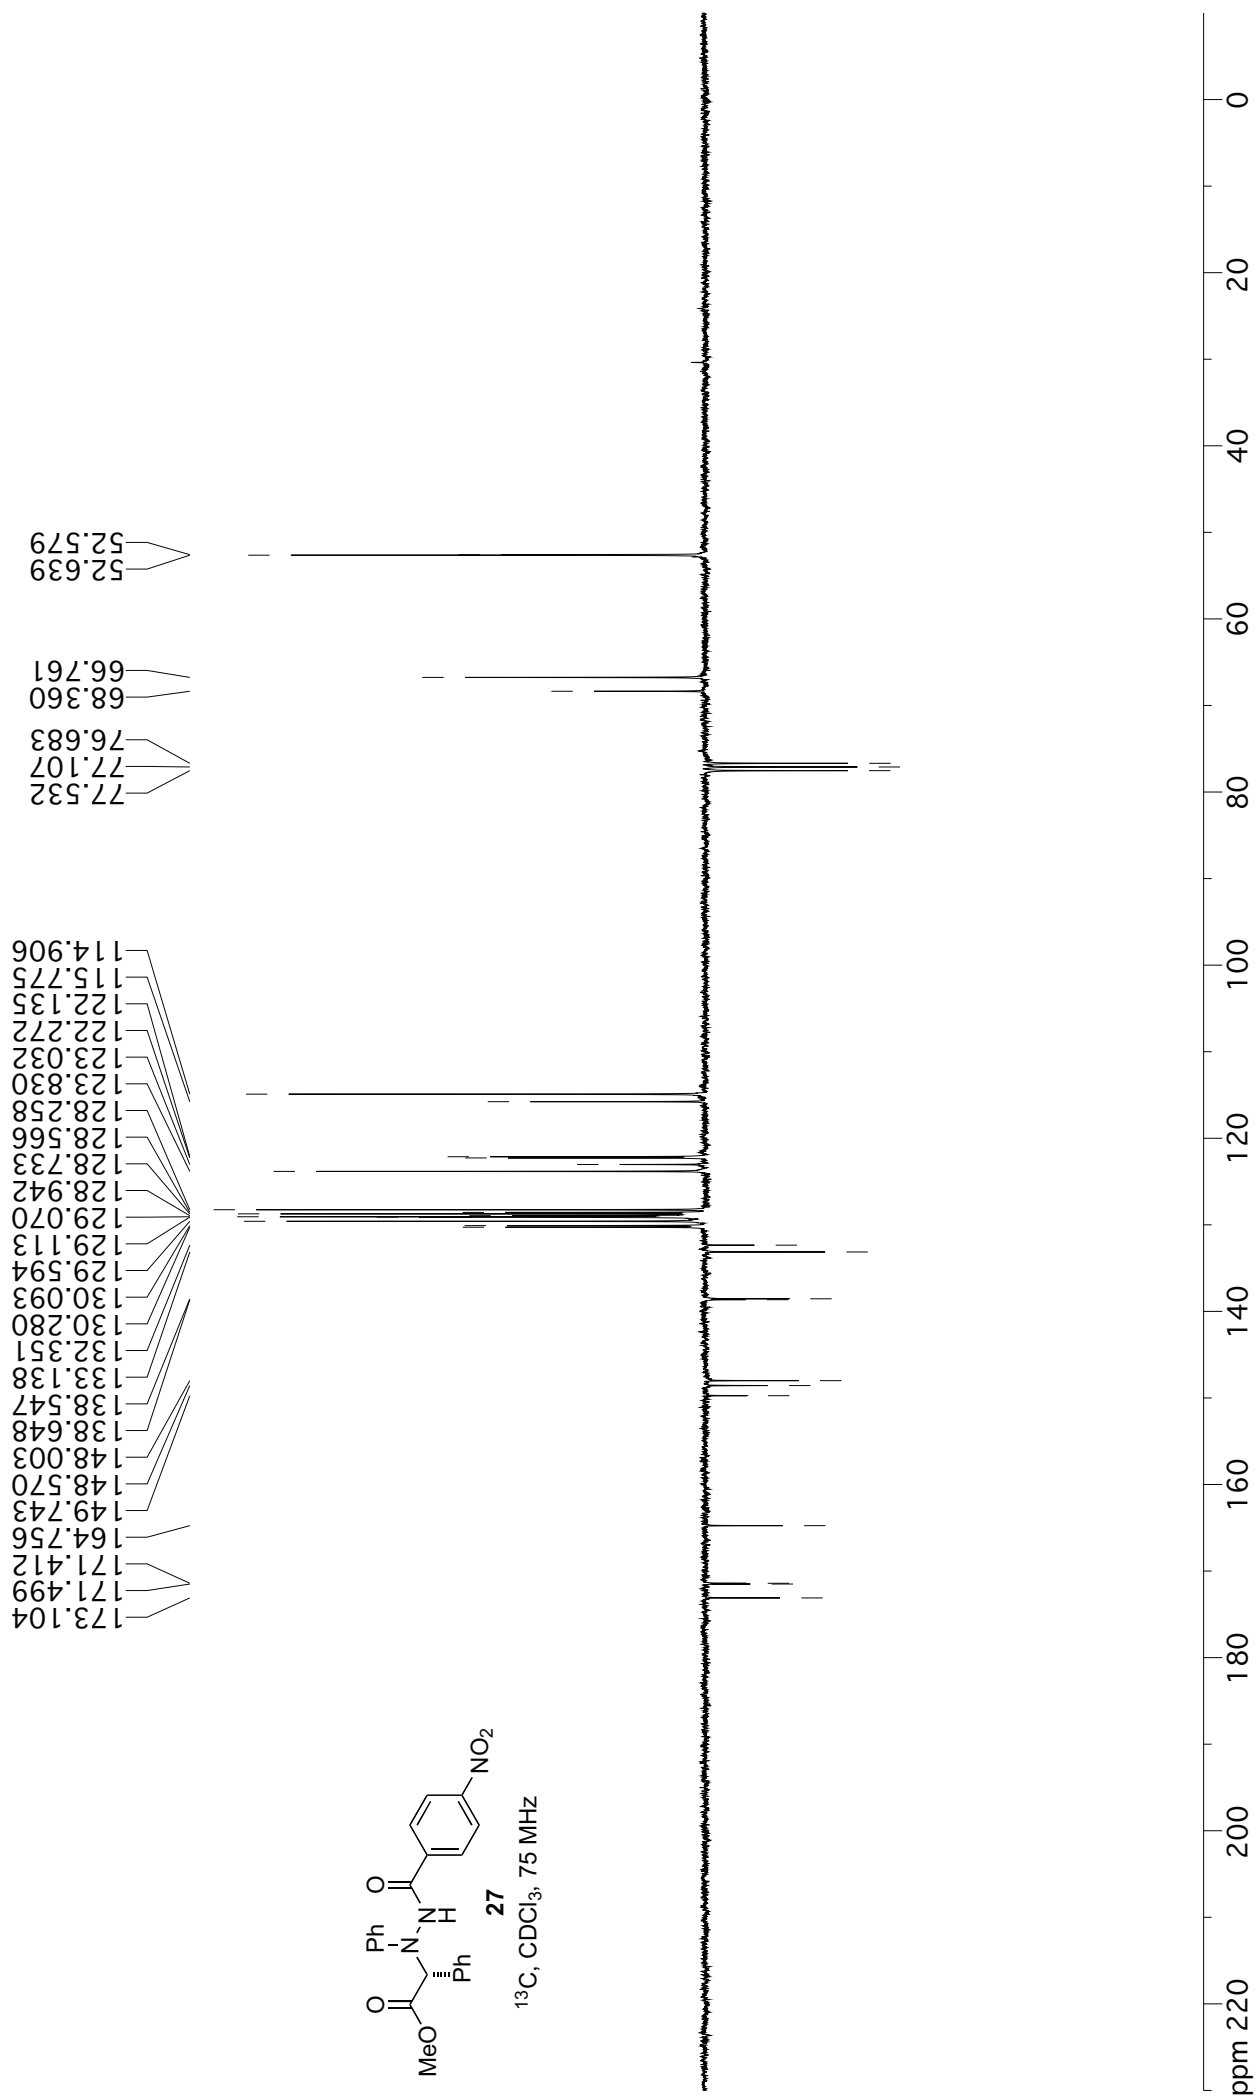

8.499  
8.175  
8.131  
8.125  
8.120  
8.108  
8.103  
8.097  
7.819  
7.814  
7.809  
7.796  
7.792  
7.786  
7.581  
7.575  
7.570  
7.558  
7.553  
7.547  
7.397  
7.392  
7.378  
7.375  
7.361  
7.356  
7.273  
7.268  
7.255  
7.252  
7.238  
7.233  
7.227  
7.213  
7.210  
7.200  
7.196  
7.194  
7.191  
7.188  
7.180  
7.176  
7.167  
7.165  
7.159  
7.155  
7.142  
7.138  
7.124  
7.119  
7.073  
7.062  
7.054  
7.044  
7.035  
7.027  
7.021  
7.015  
6.999  
6.996  
6.983  
6.978  
6.974  
6.957  
6.937  
6.935  
6.914  
6.896  
6.851  
6.845  
6.840  
6.828  
6.823  
6.818  
6.761  
6.756  
6.752  
6.748  
6.739  
5.910  
5.636  
3.728  
3.601  
2.533  
1.685

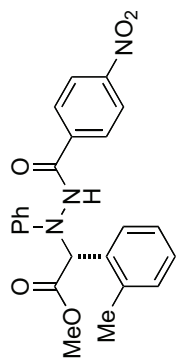

<sup>1</sup>H, CDCl<sub>3</sub>, 400 MHz

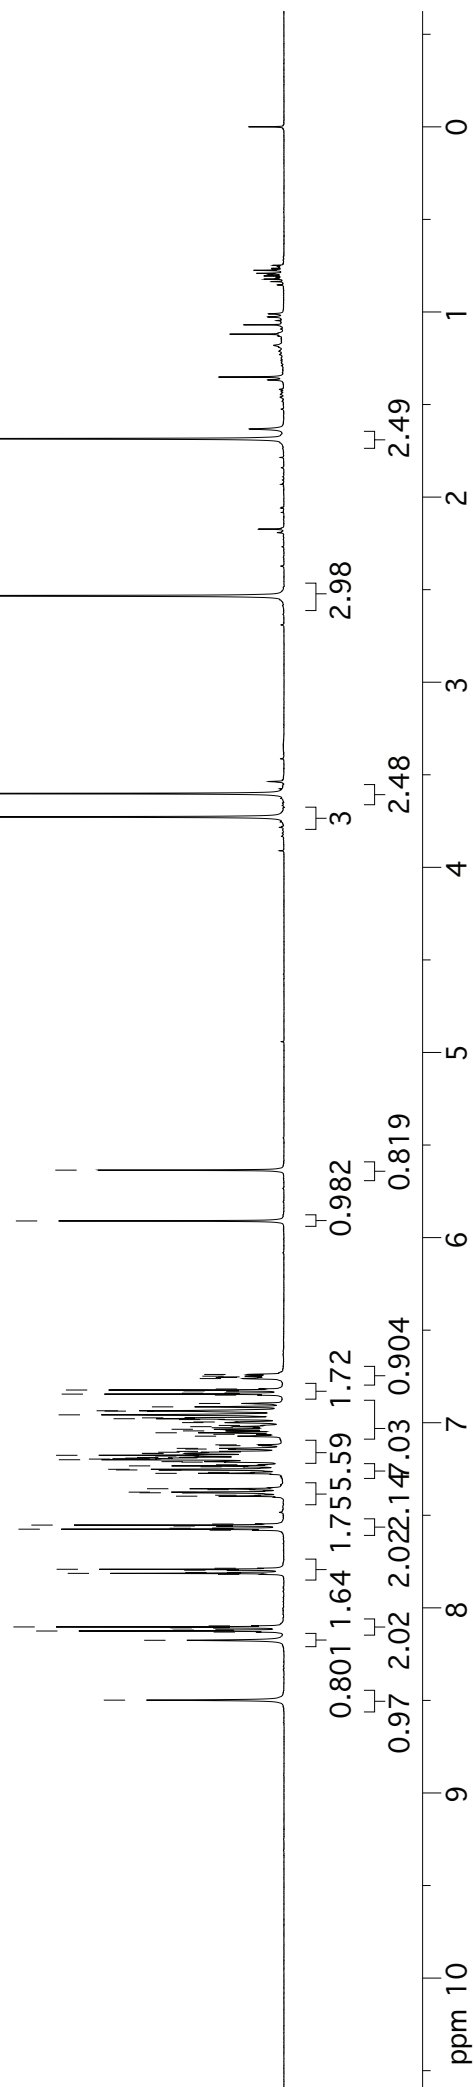

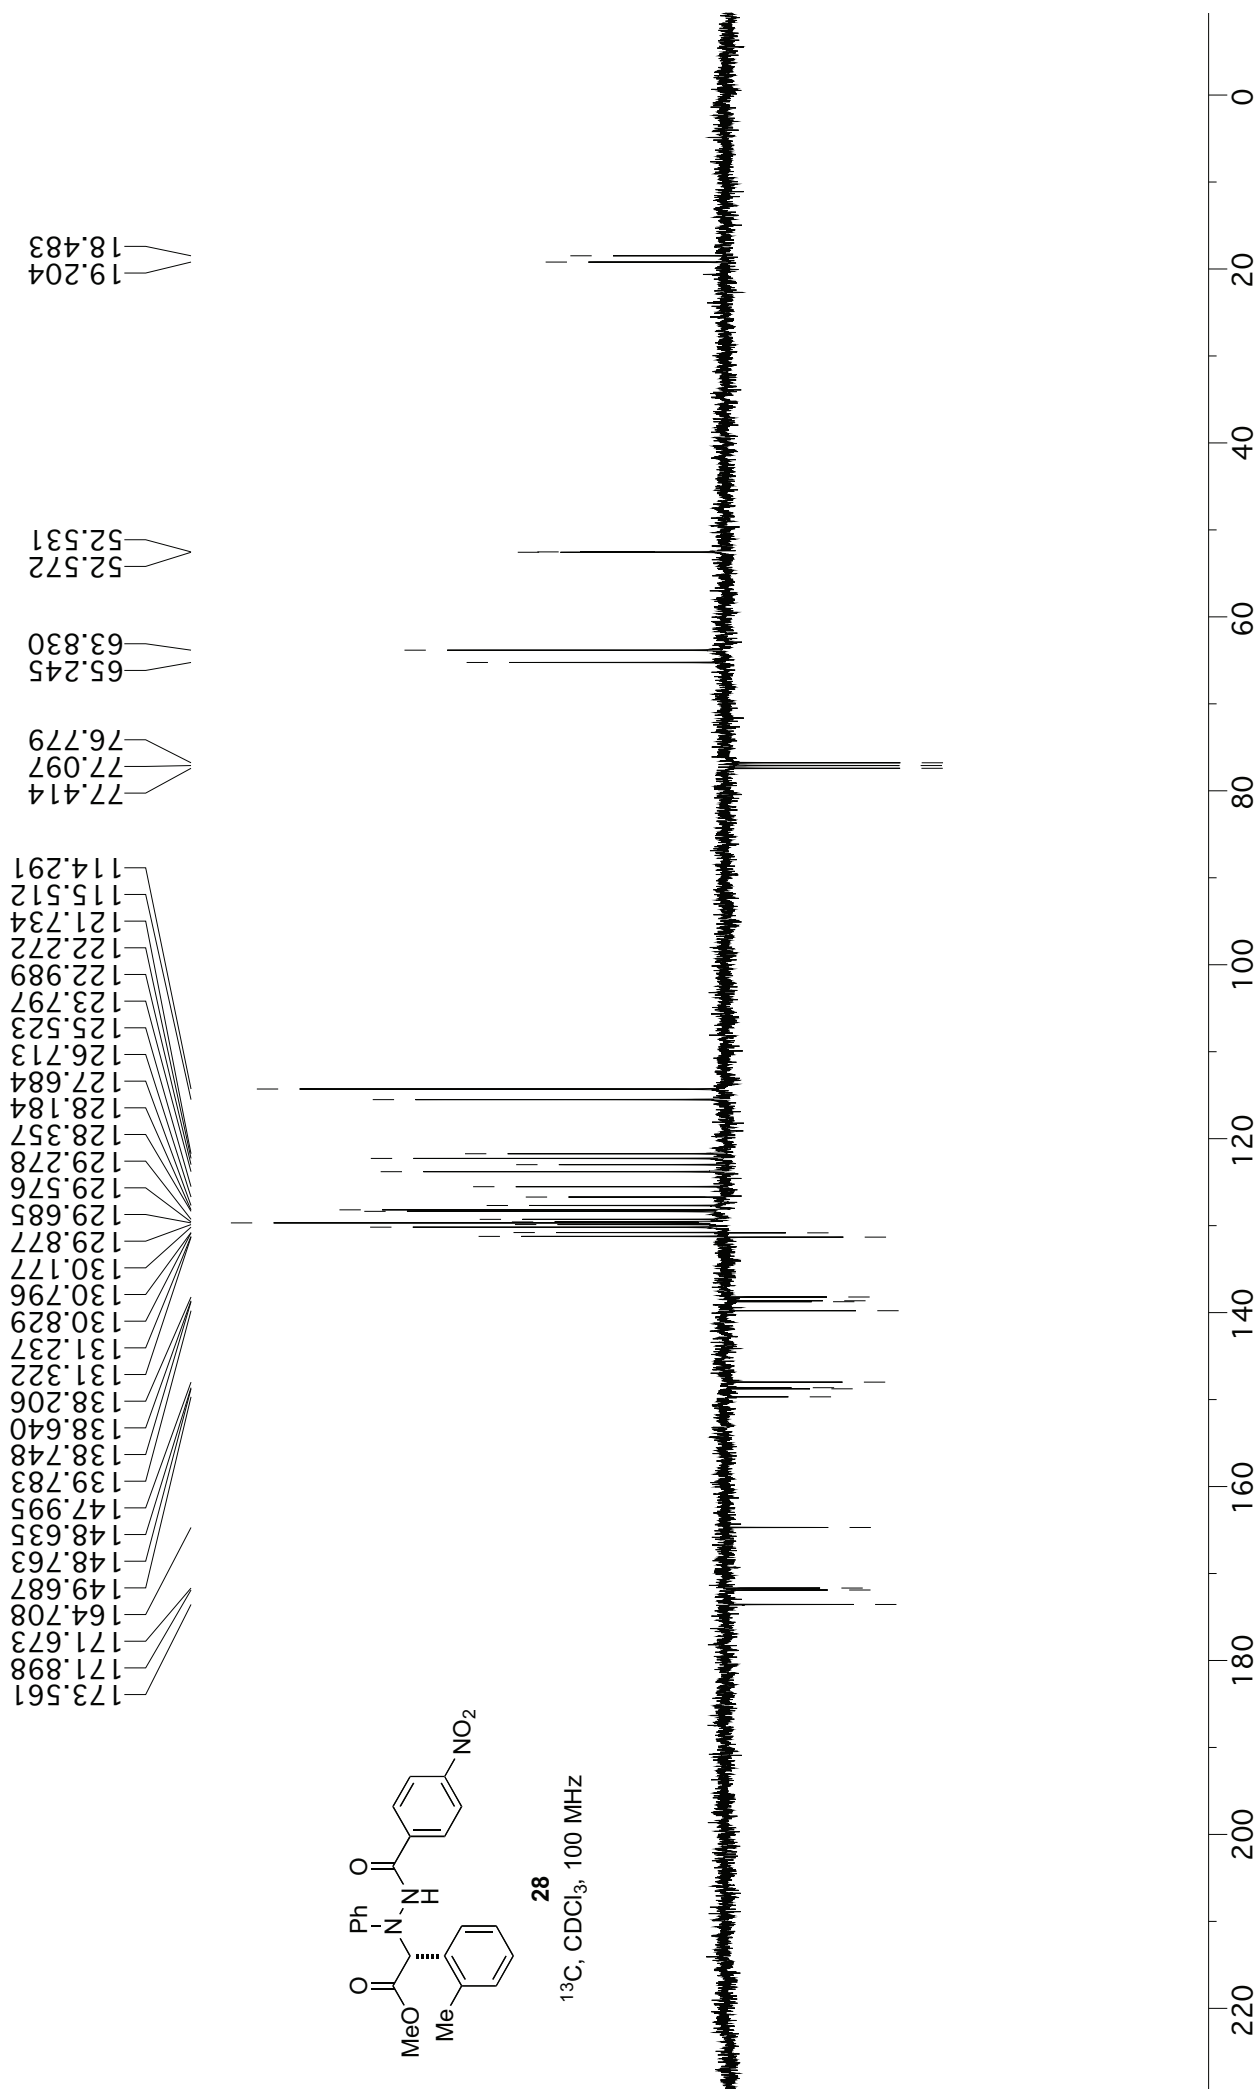

8.570  
8.195  
8.173  
8.158  
8.069  
8.065  
8.052  
8.047  
8.042  
7.793  
7.772  
7.747  
7.741  
7.744  
7.469  
7.460  
7.451  
7.441  
7.438  
7.433  
7.424  
7.420  
7.413  
7.321  
7.311  
7.301  
7.299  
7.293  
7.271  
7.261  
7.248  
7.243  
7.225  
7.193  
7.191  
7.172  
7.155  
7.116  
7.097  
7.079  
7.049  
7.029  
7.000  
6.997  
6.982  
6.979  
6.975  
6.961  
6.958  
6.559  
6.554  
6.549  
6.537  
6.532  
6.527  
6.520  
6.295  
3.758  
3.660

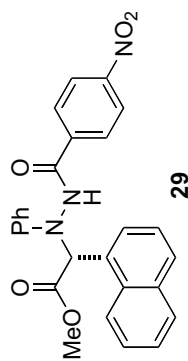

<sup>1</sup>H, CDCl<sub>3</sub>, 400 MHz

0.837  
3

0.6599 1.037 3.107 1.28 0.289

0.286 0.892 1.644 0.302 0.38 1.95 1.01

ppm 10

9

8

7

6

5

4

3

2

1

0

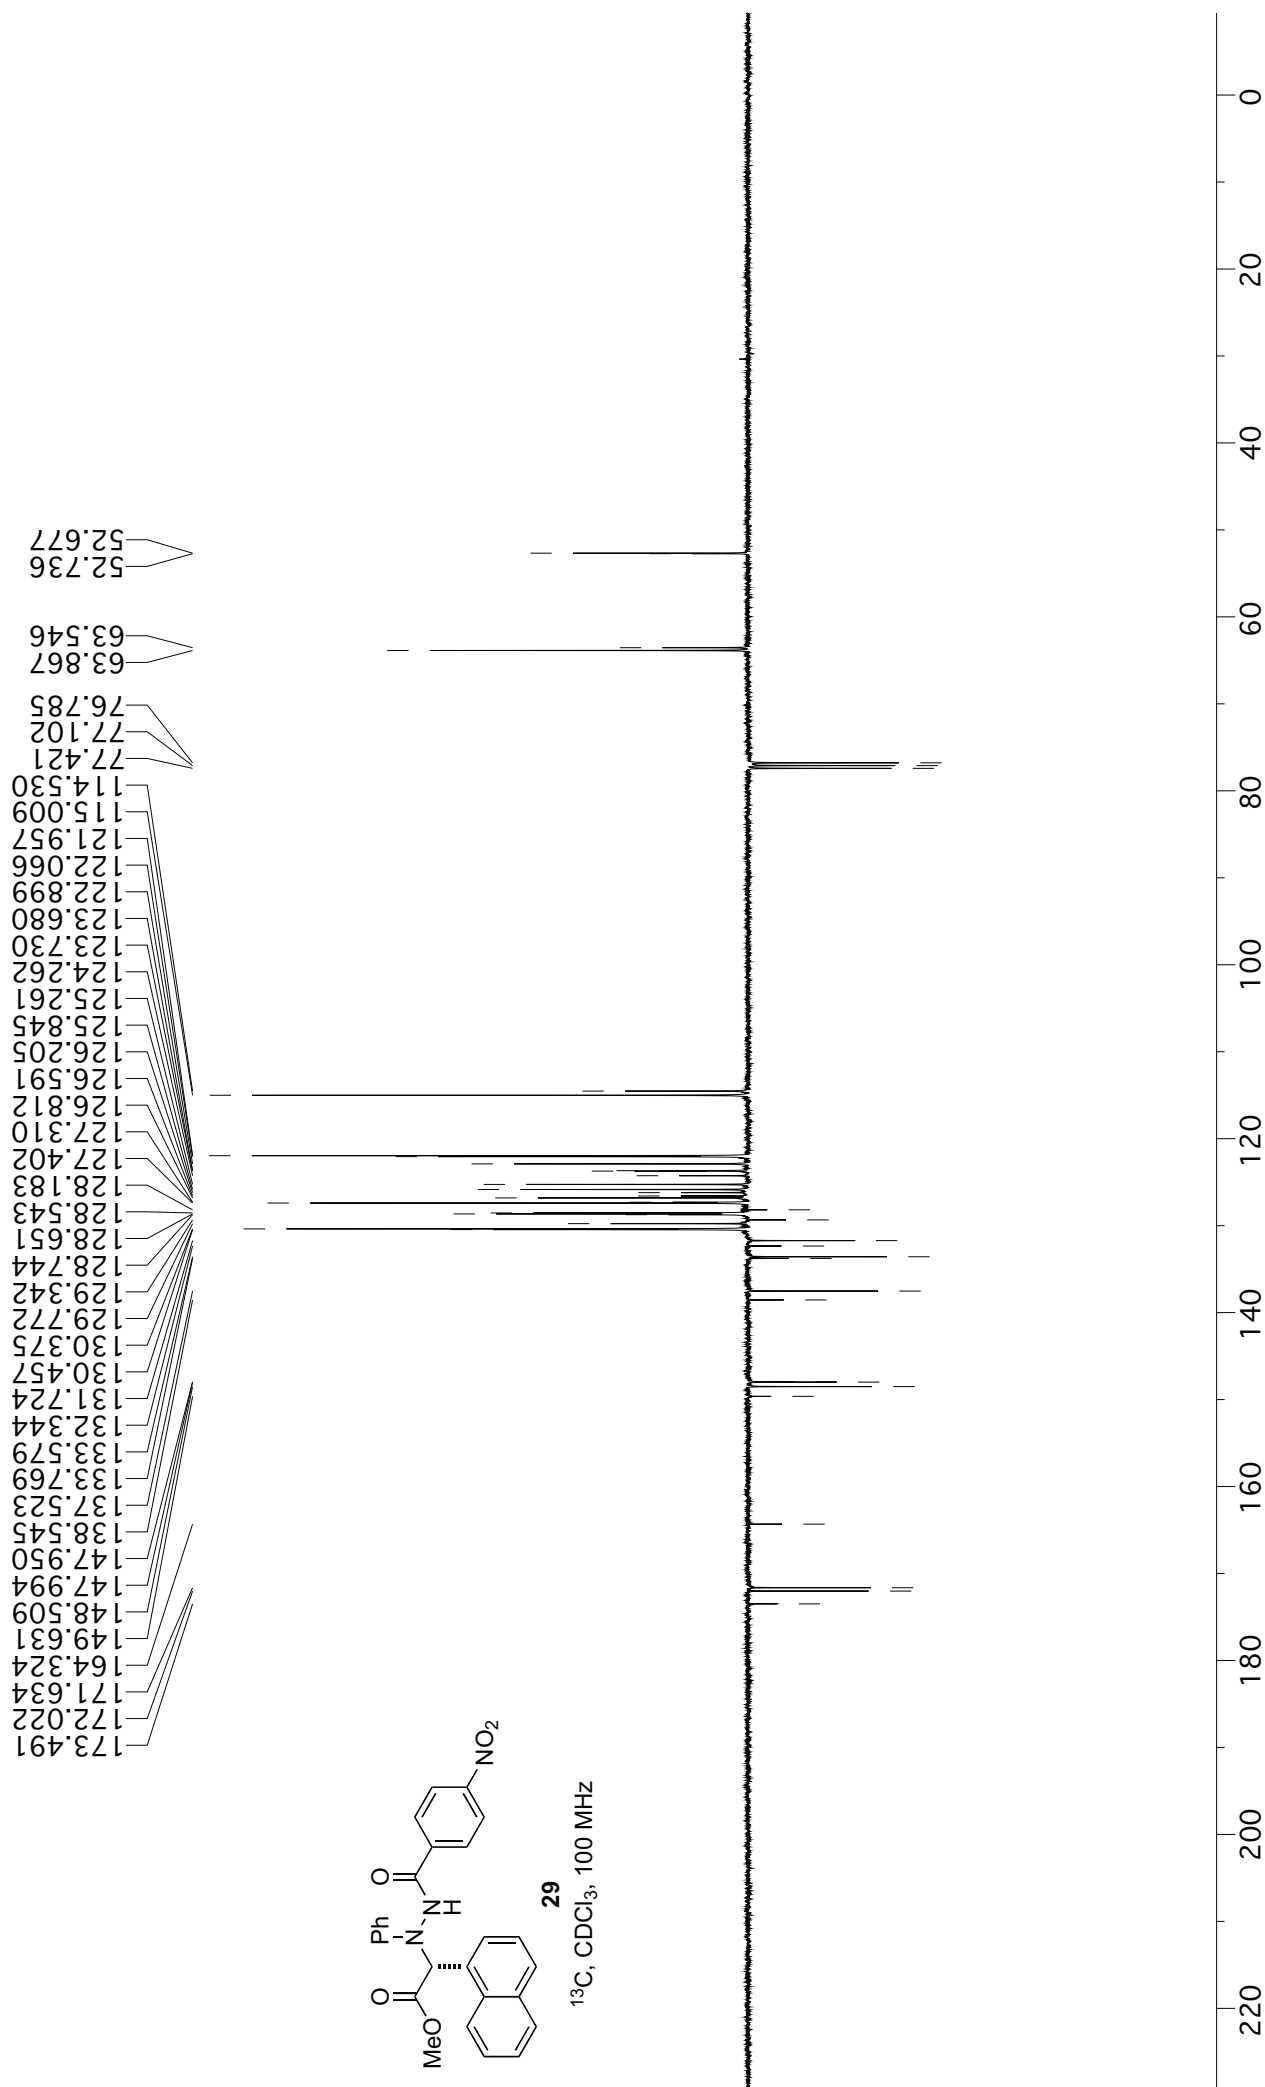

8.713  
8.165  
8.146  
8.141  
8.136  
8.124  
8.119  
8.113  
7.811  
7.806  
7.801  
7.788  
7.783  
7.613  
7.608  
7.603  
7.591  
7.586  
7.580  
7.522  
7.408  
7.389  
7.386  
7.367  
7.362  
7.342  
7.279  
7.273  
7.268  
7.254  
7.251  
7.238  
7.233  
7.228  
7.182  
7.172  
7.153  
7.101  
7.083  
7.064  
7.054  
7.034  
6.971  
6.969  
6.952  
6.950  
6.930  
6.920  
6.915  
6.902  
6.897  
5.832  
5.515  
3.768  
3.645

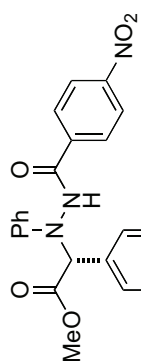

<sup>1</sup>H, CDCl<sub>3</sub>, 400 MHz

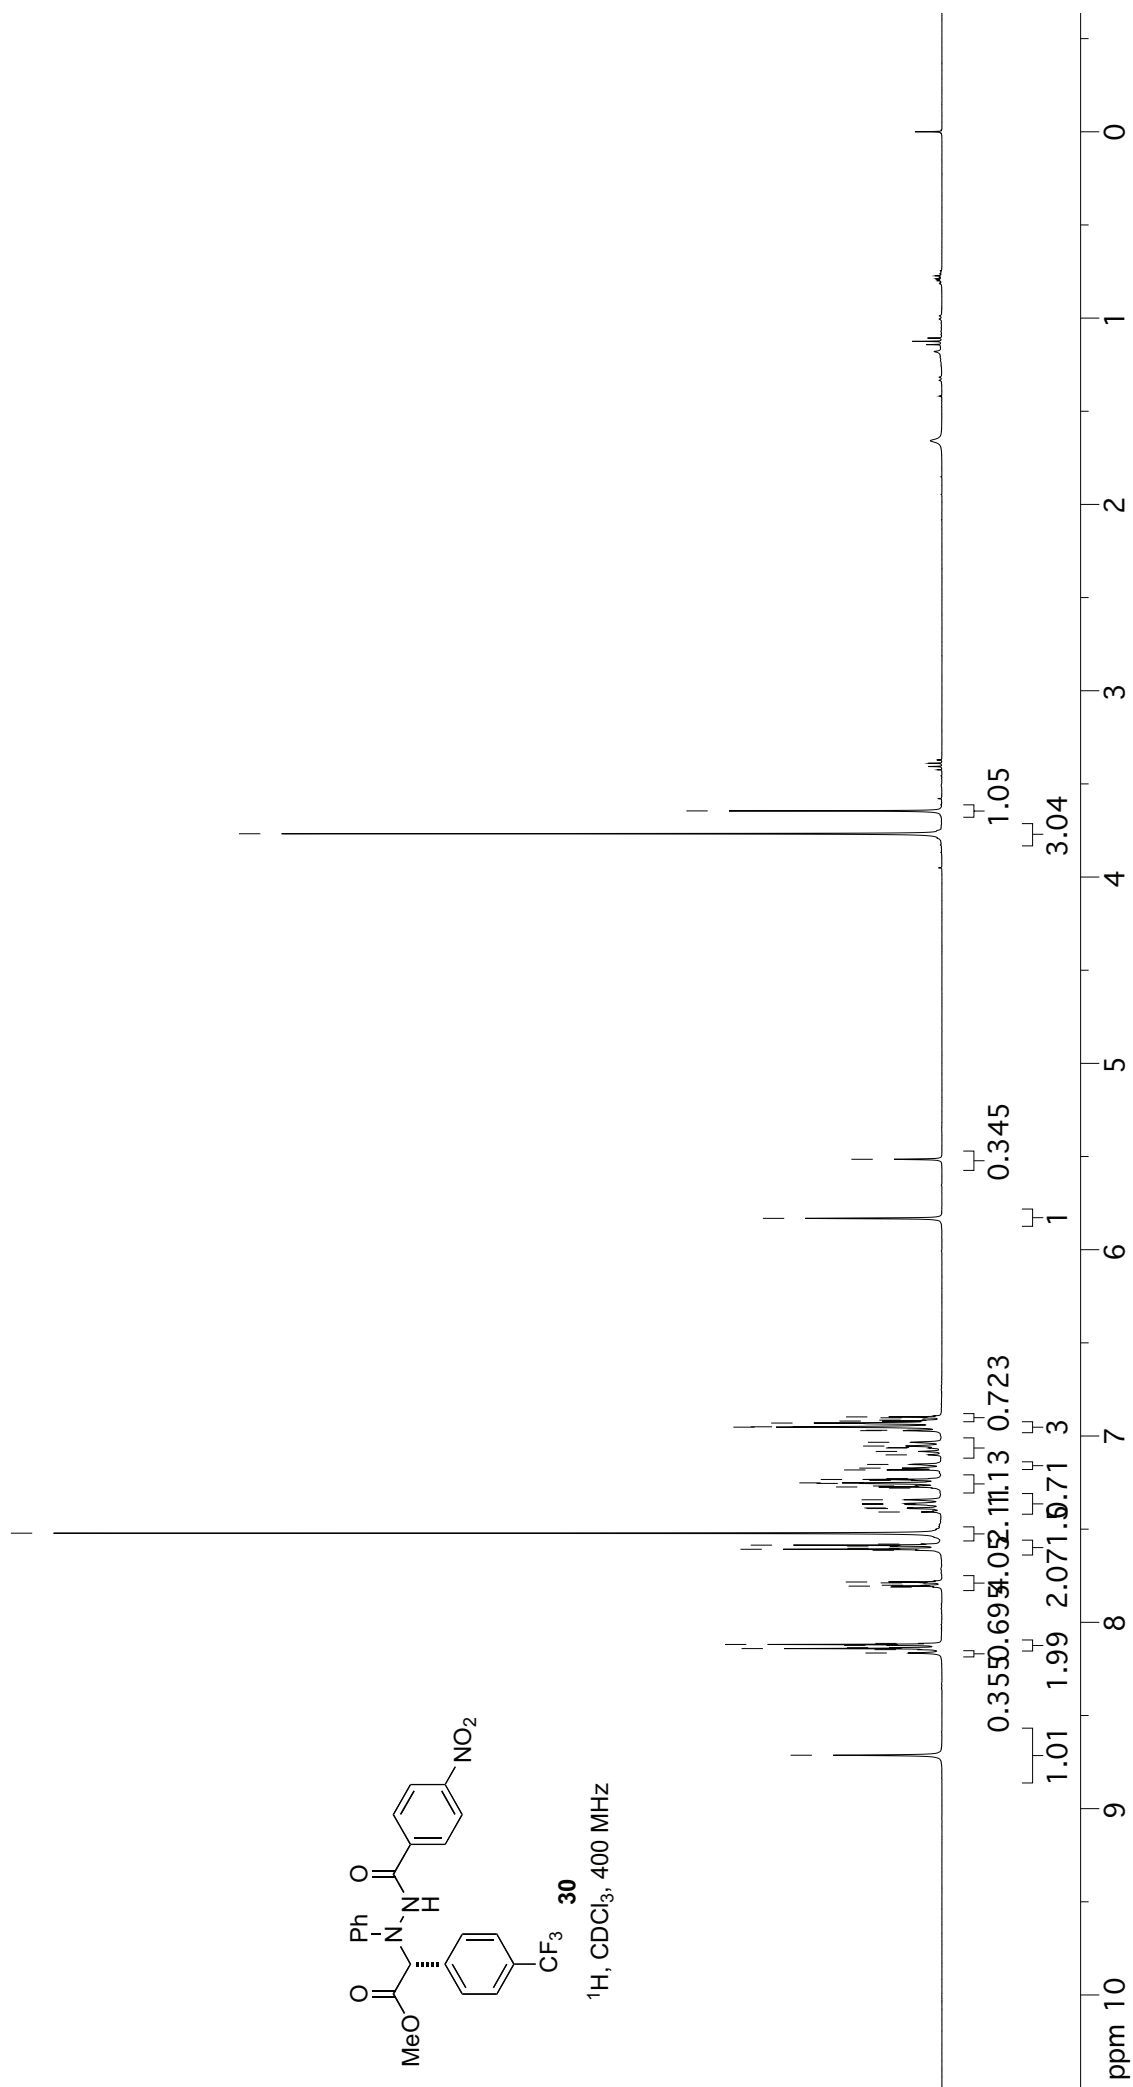

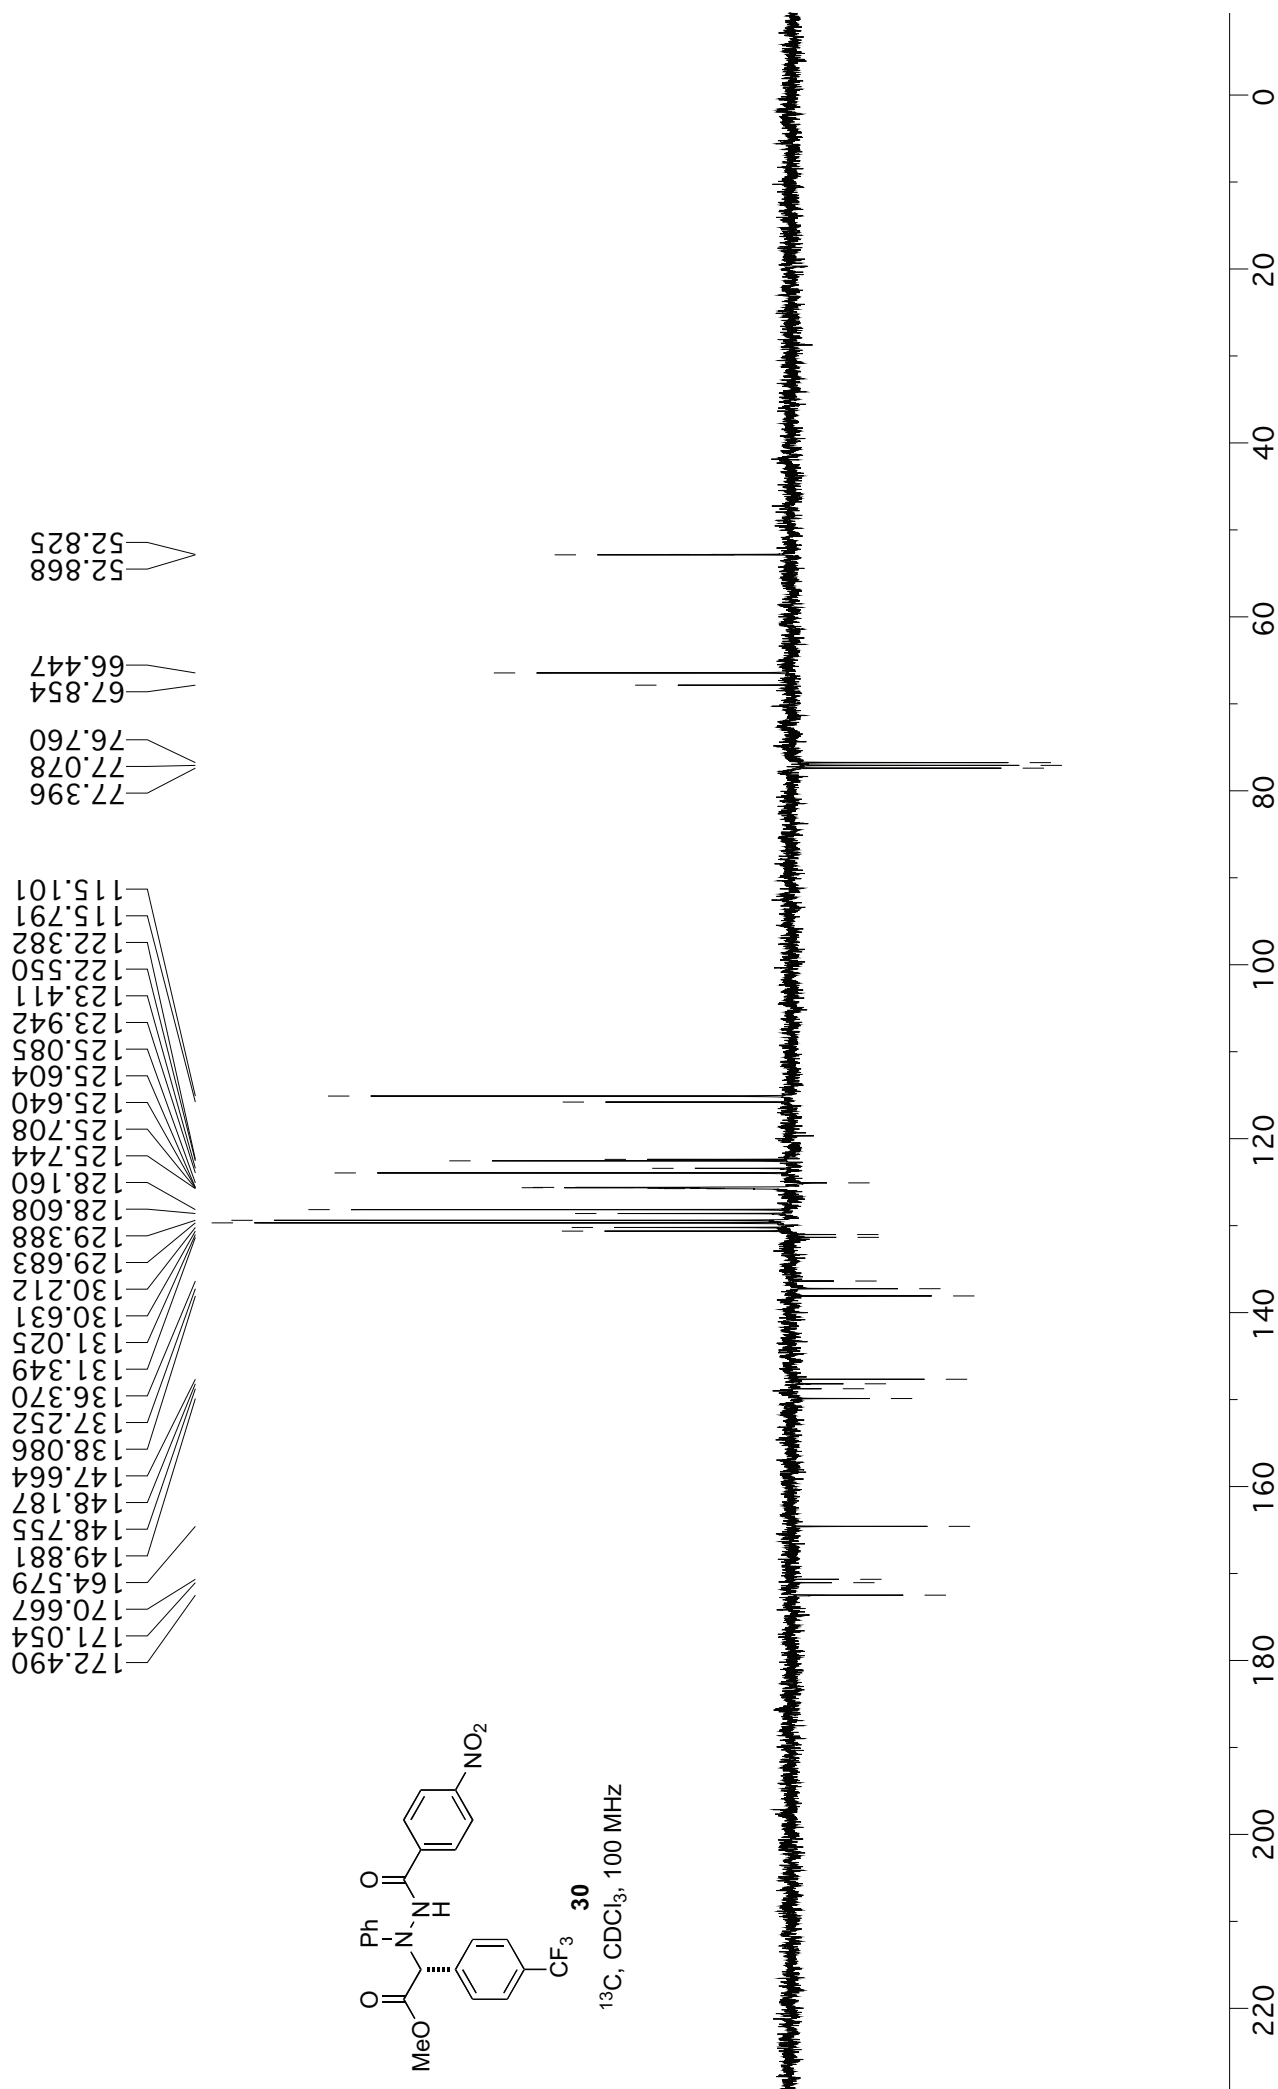



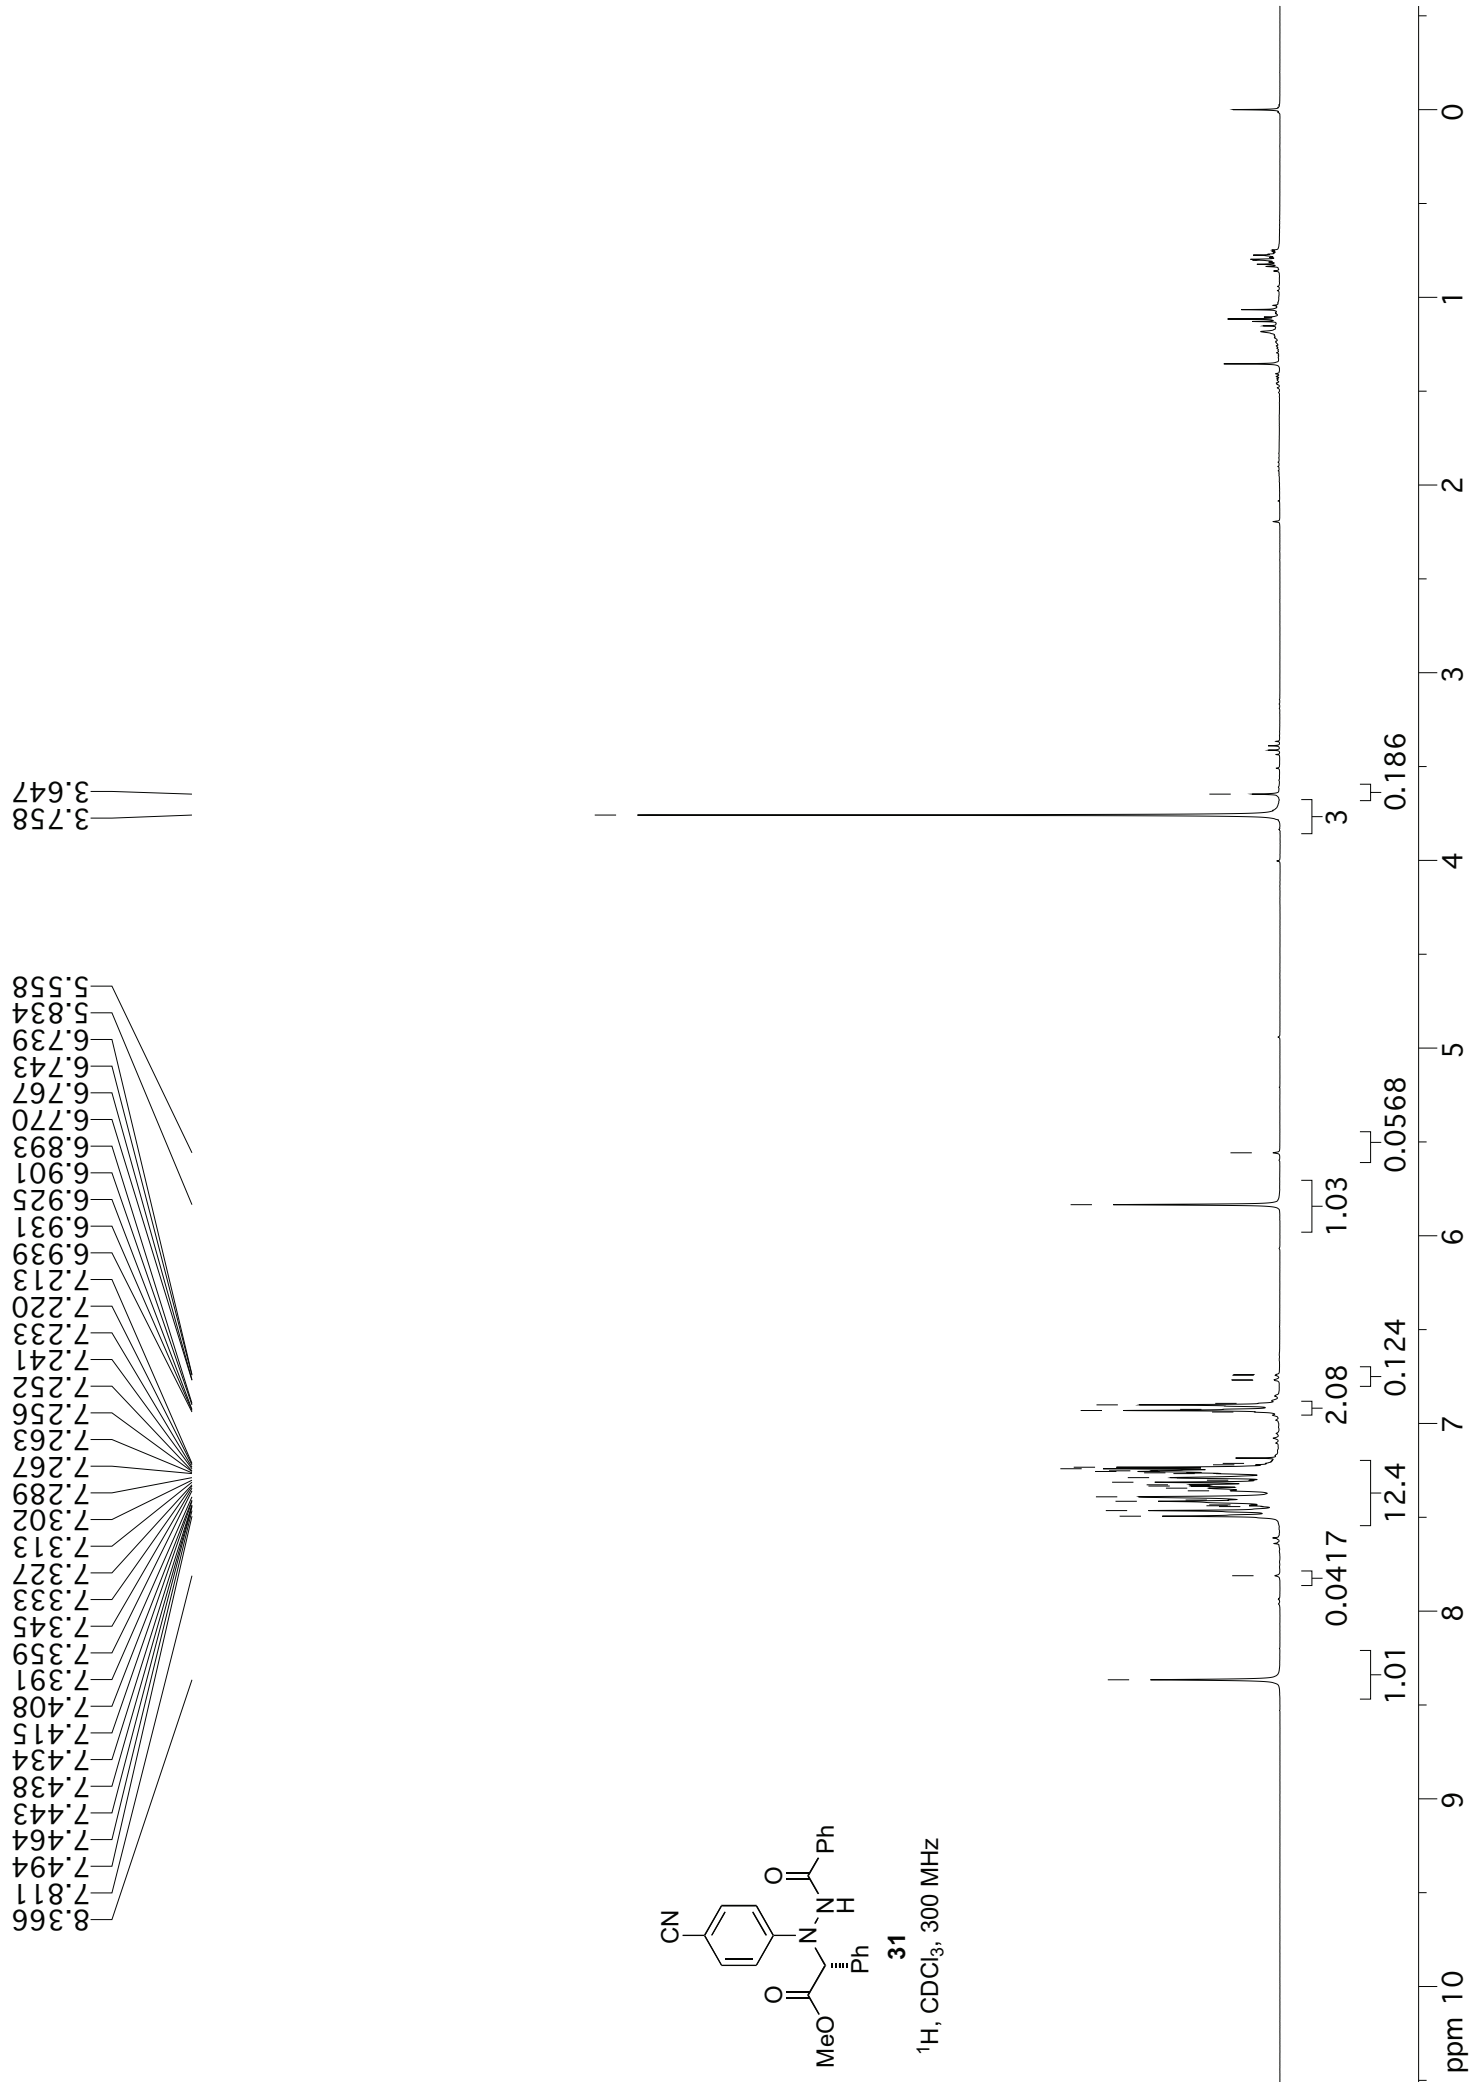

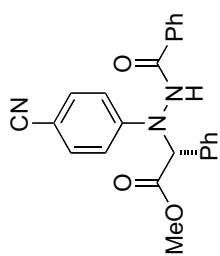

**31**

<sup>13</sup>C, CDCl<sub>3</sub>, 75 MHz

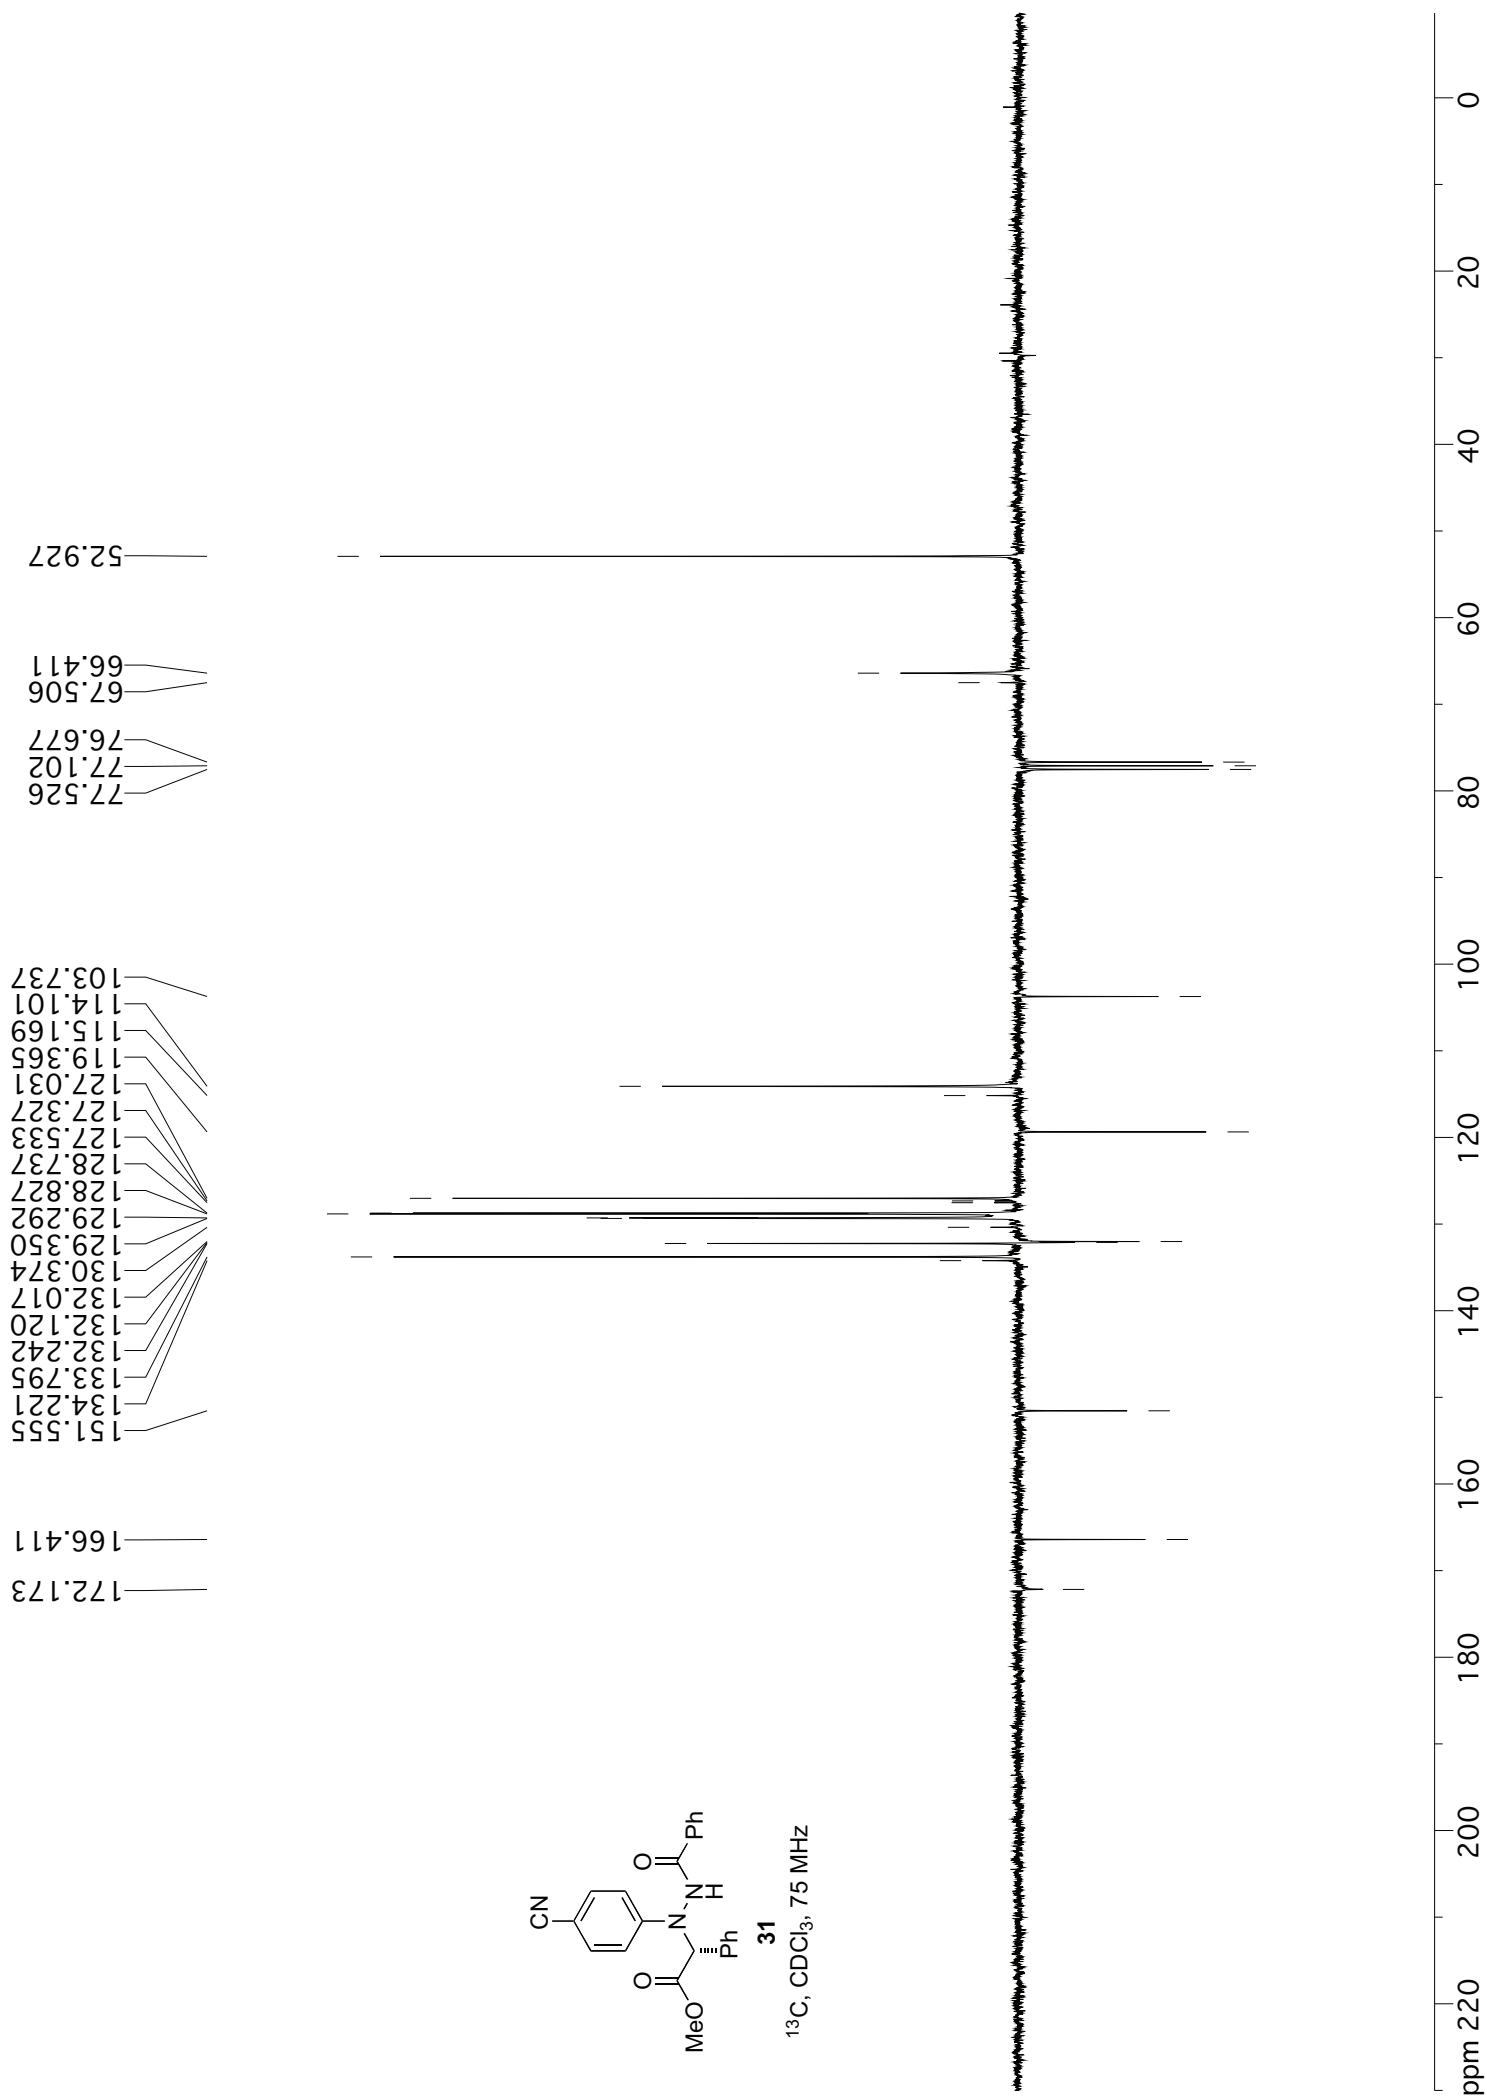

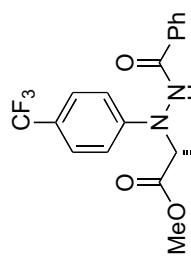

**32**  
<sup>1</sup>H, CDCl<sub>3</sub>, 300 MHz

8.673  
8.041  
7.579  
7.550  
7.536  
7.510  
7.497  
7.489  
7.468  
7.383  
7.357  
7.341  
7.331  
7.323  
7.088  
7.060  
5.967  
5.703  
3.823  
3.716

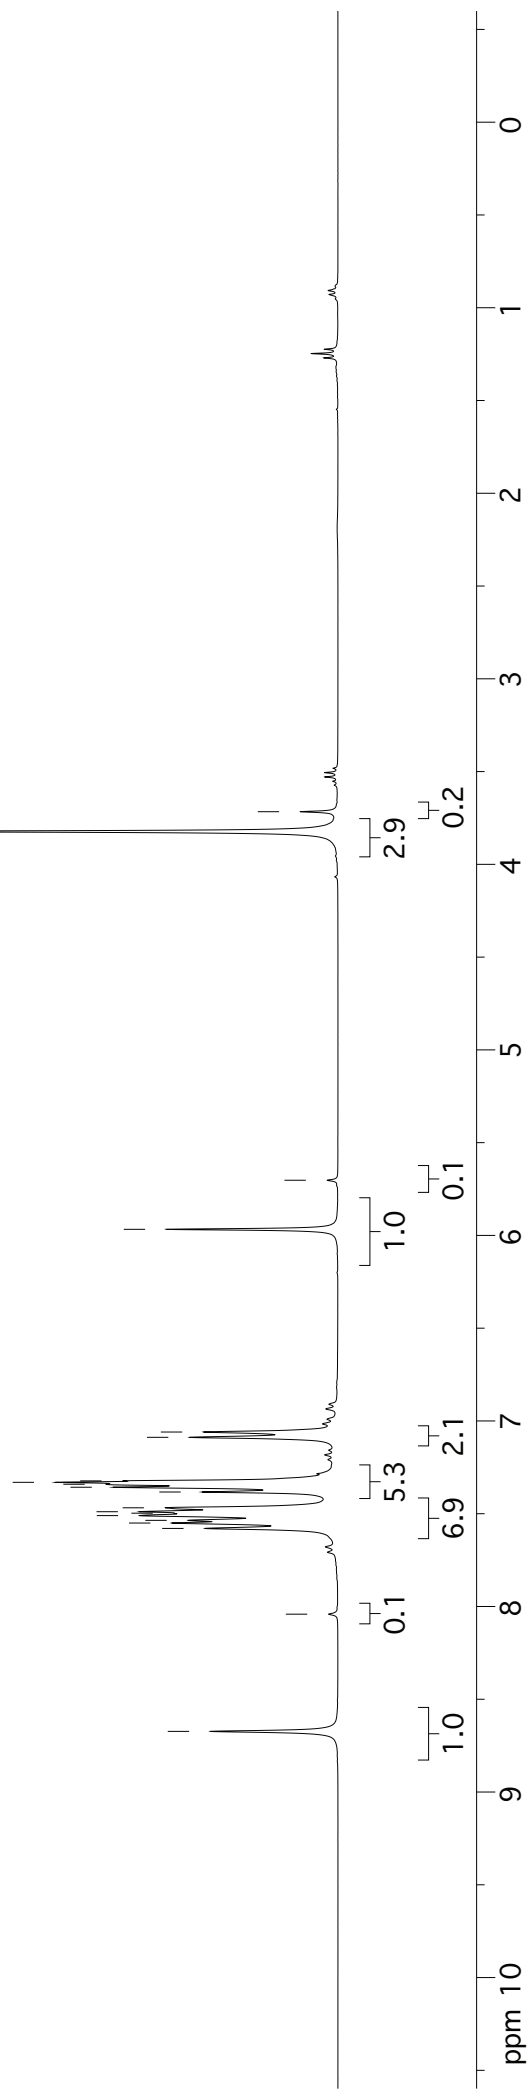

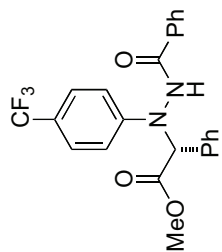

$^{13}\text{C}$ ,  $\text{CDCl}_3$ , 75 MHz

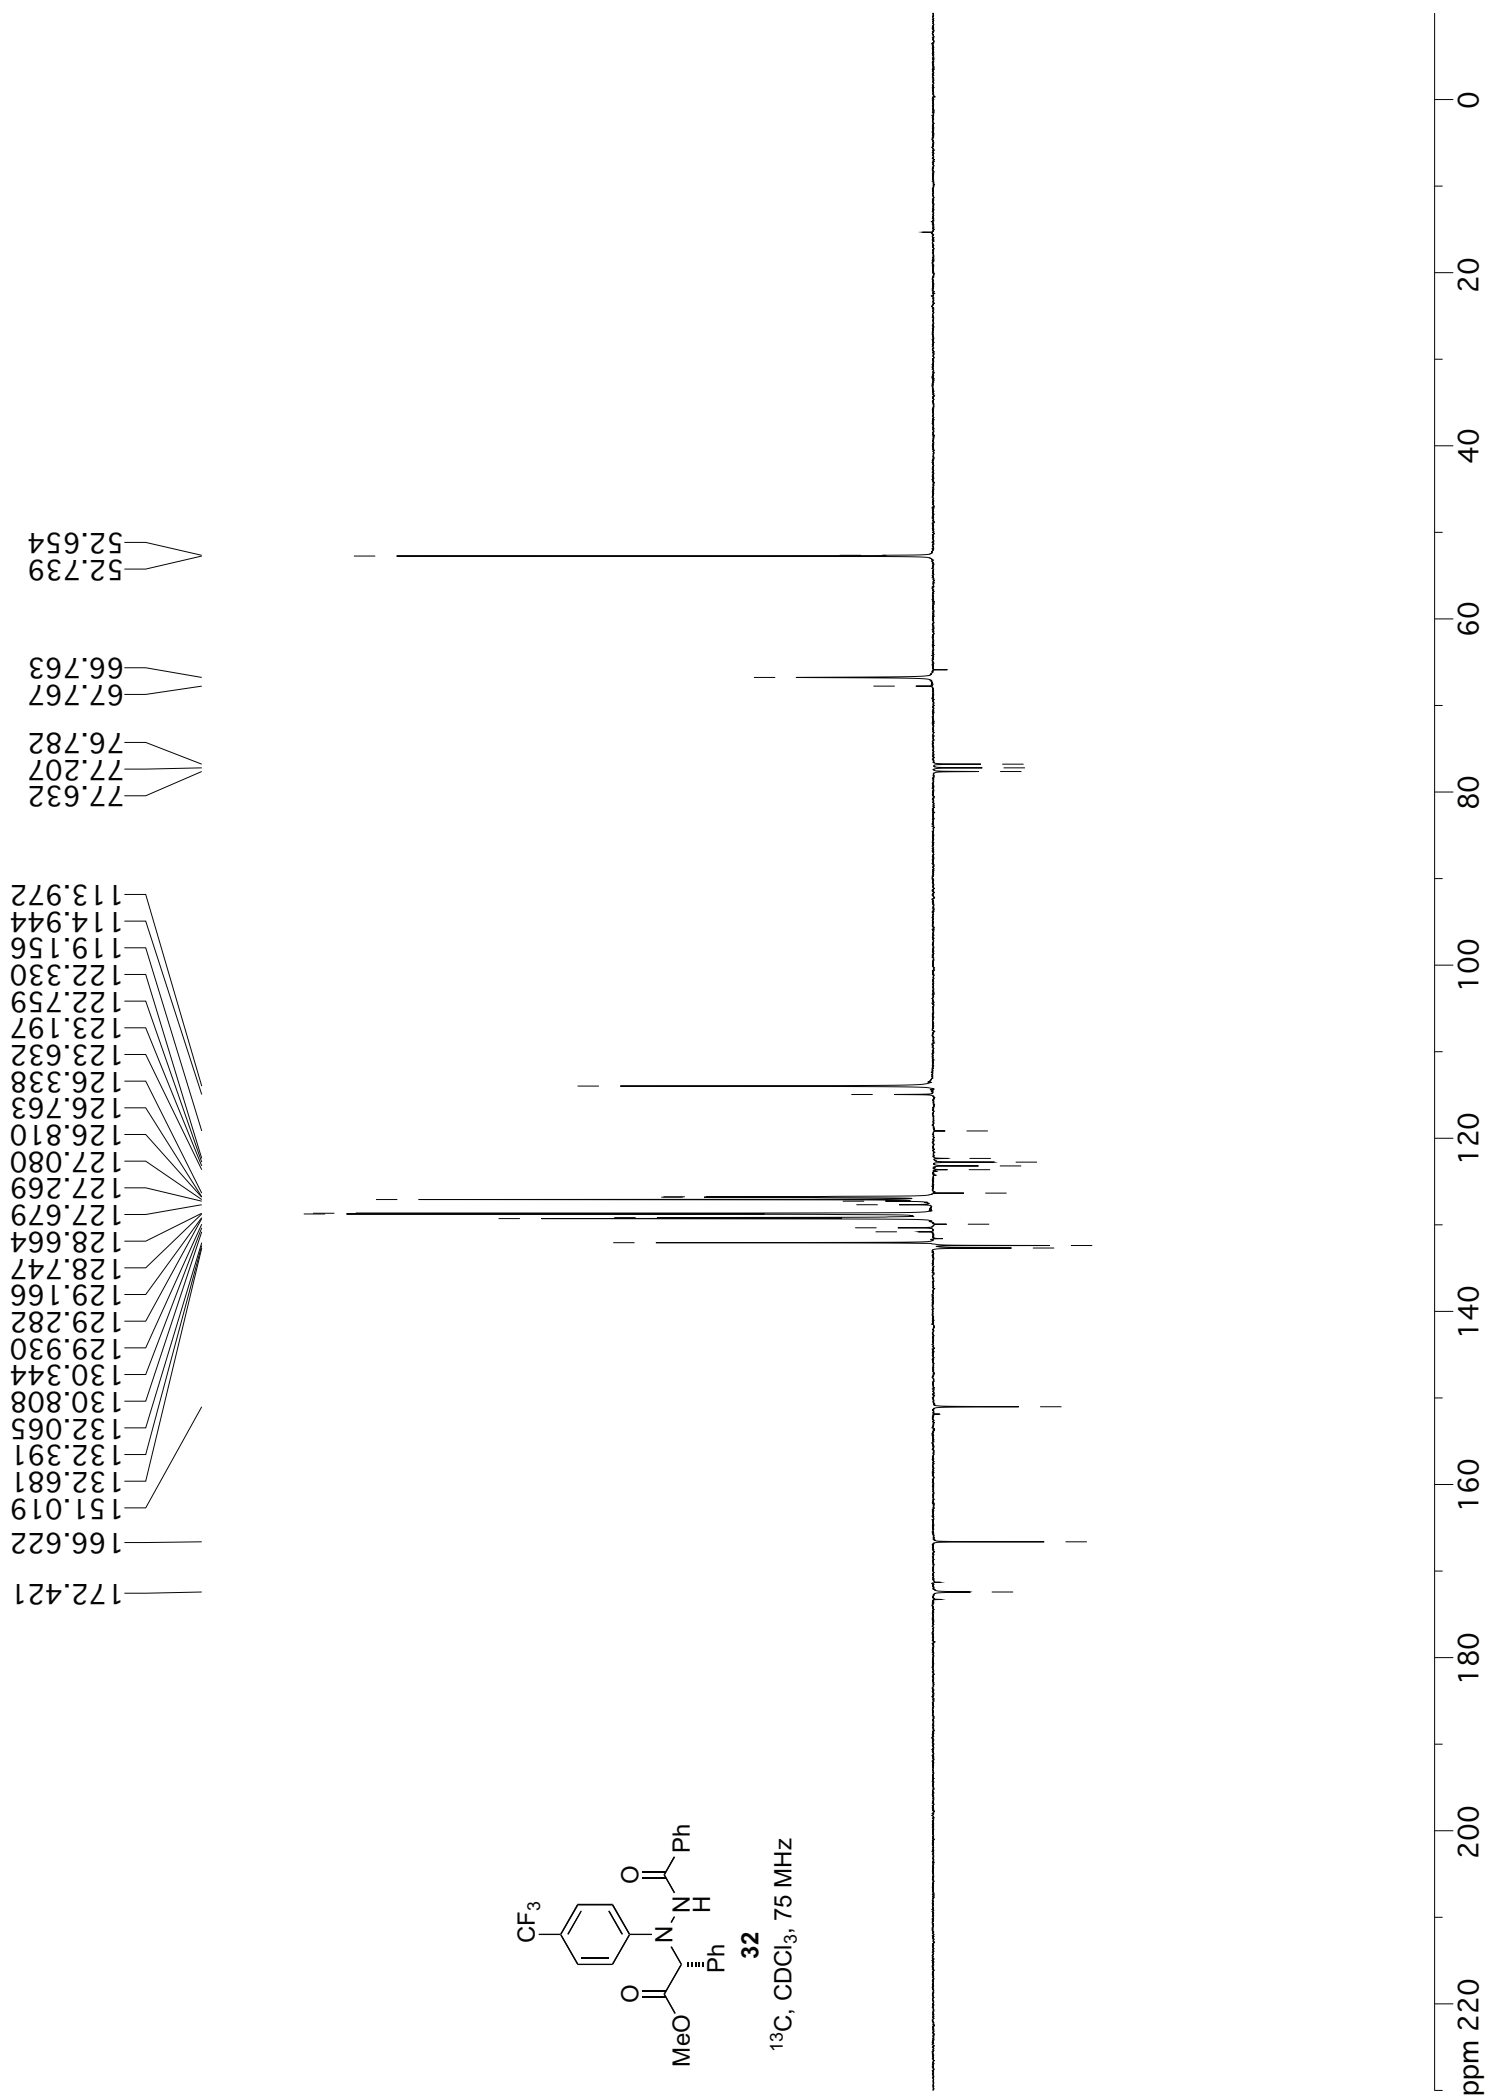

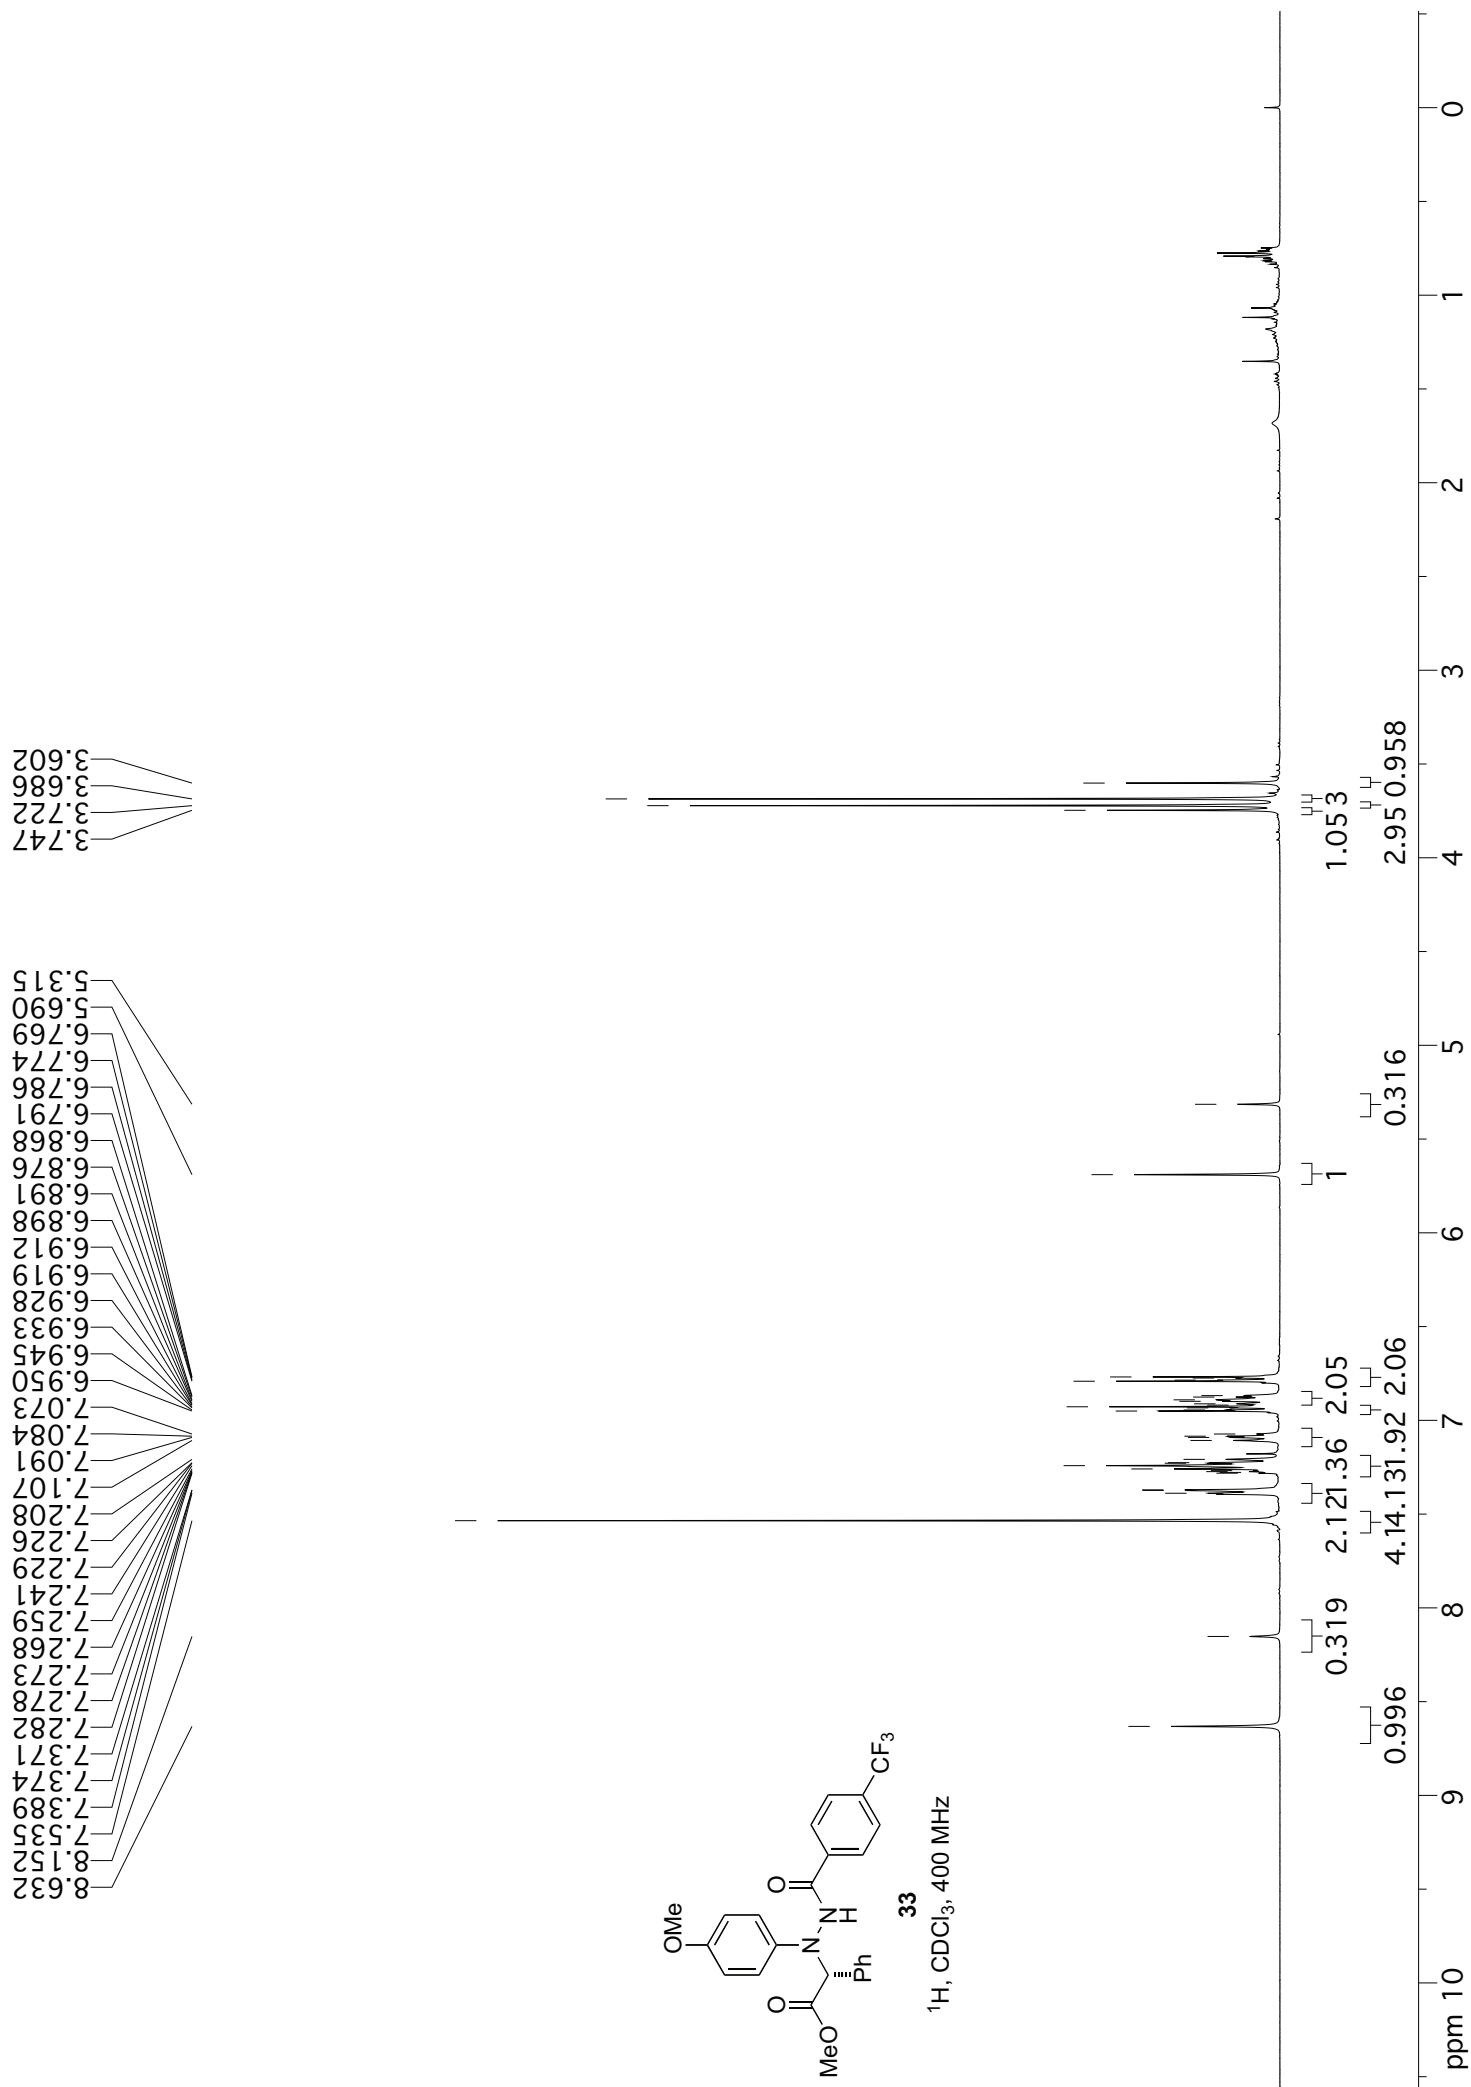

173.252  
172.250  
171.635  
165.268  
158.915  
155.211  
142.376  
142.038  
136.430  
136.247  
133.510  
133.222  
132.575  
131.675  
130.017  
128.957  
128.888  
128.754  
128.679  
128.060  
127.500  
125.676  
125.639  
125.604  
125.569  
123.976  
123.938  
117.739  
117.297  
115.082  
114.720

77.386  
77.069  
76.750  
69.330  
67.696

55.552  
52.478  
52.380

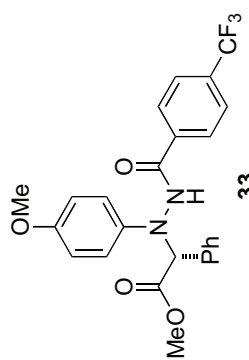

<sup>13</sup>C, CDCl<sub>3</sub>, 100 MHz

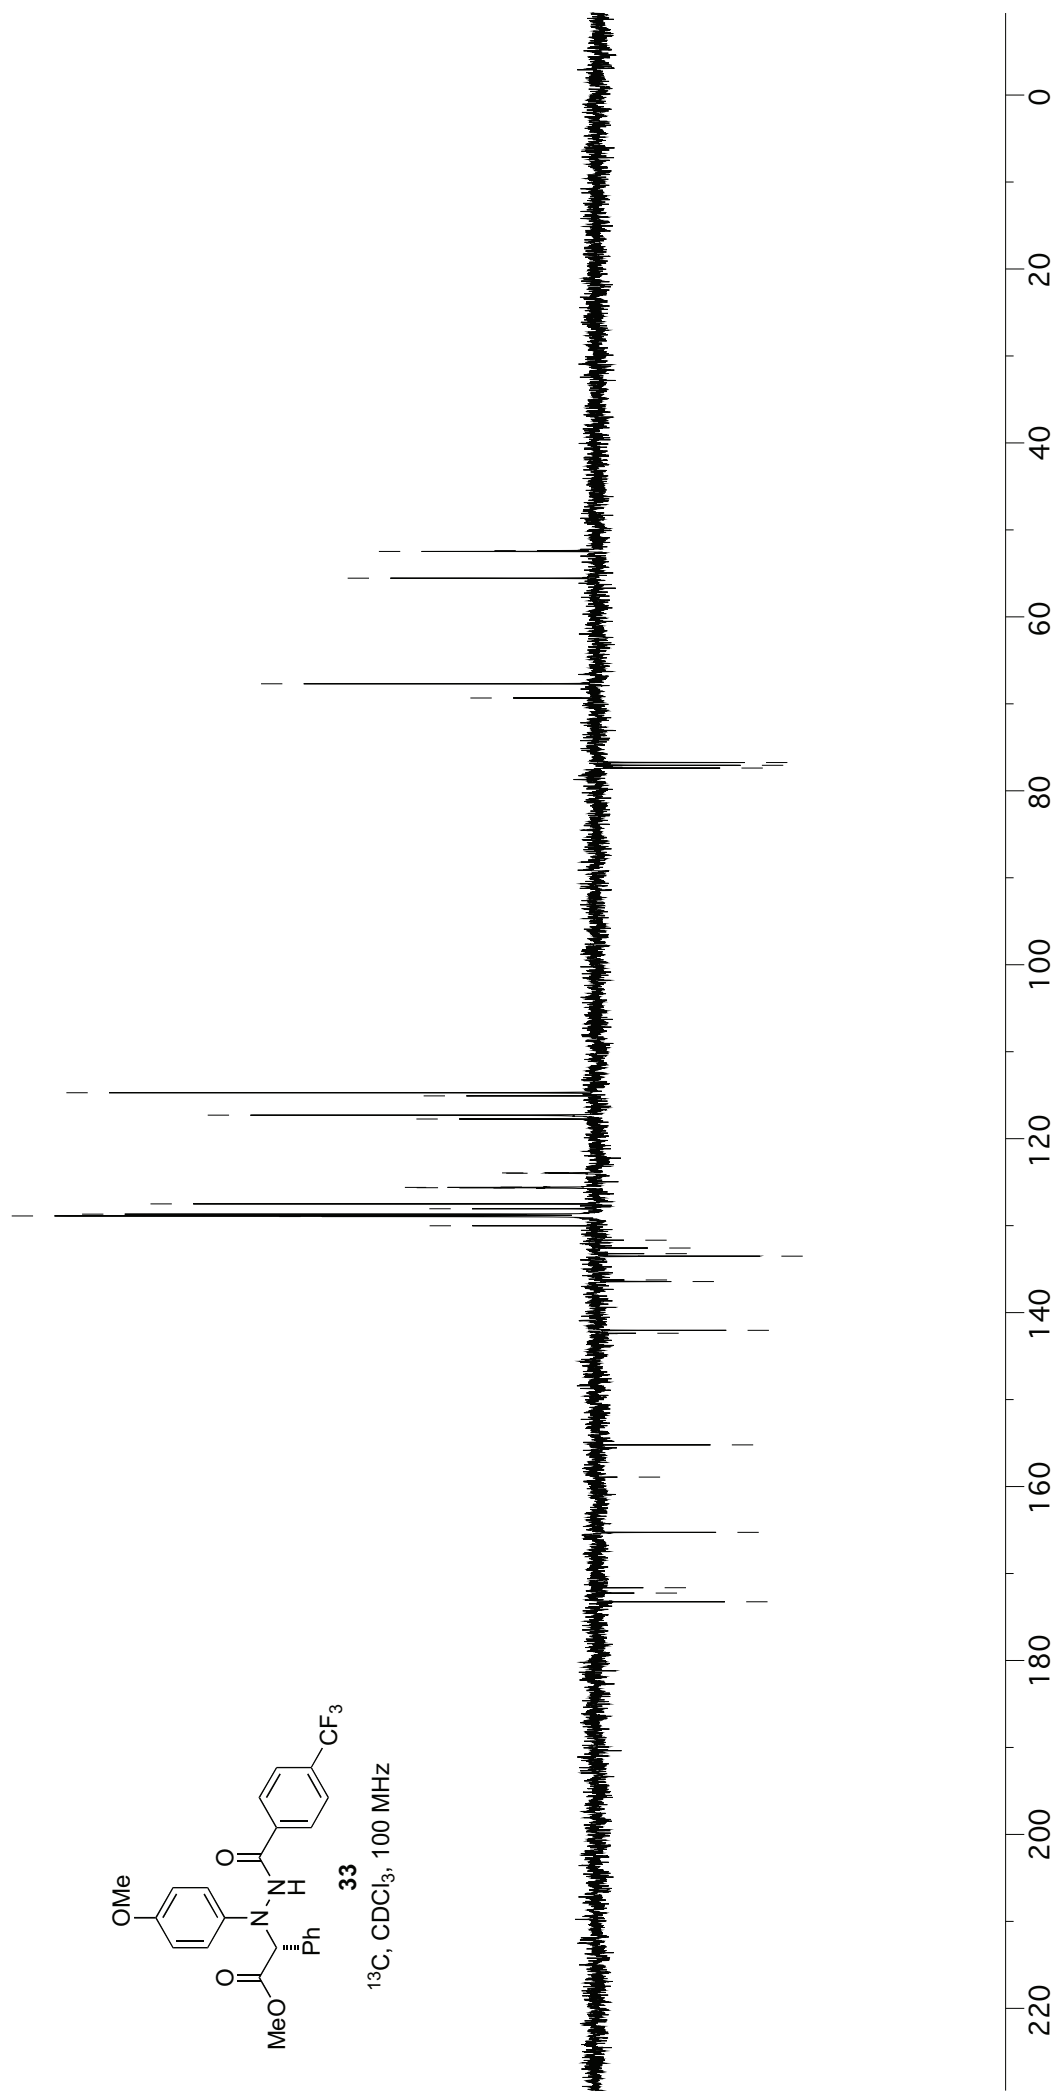

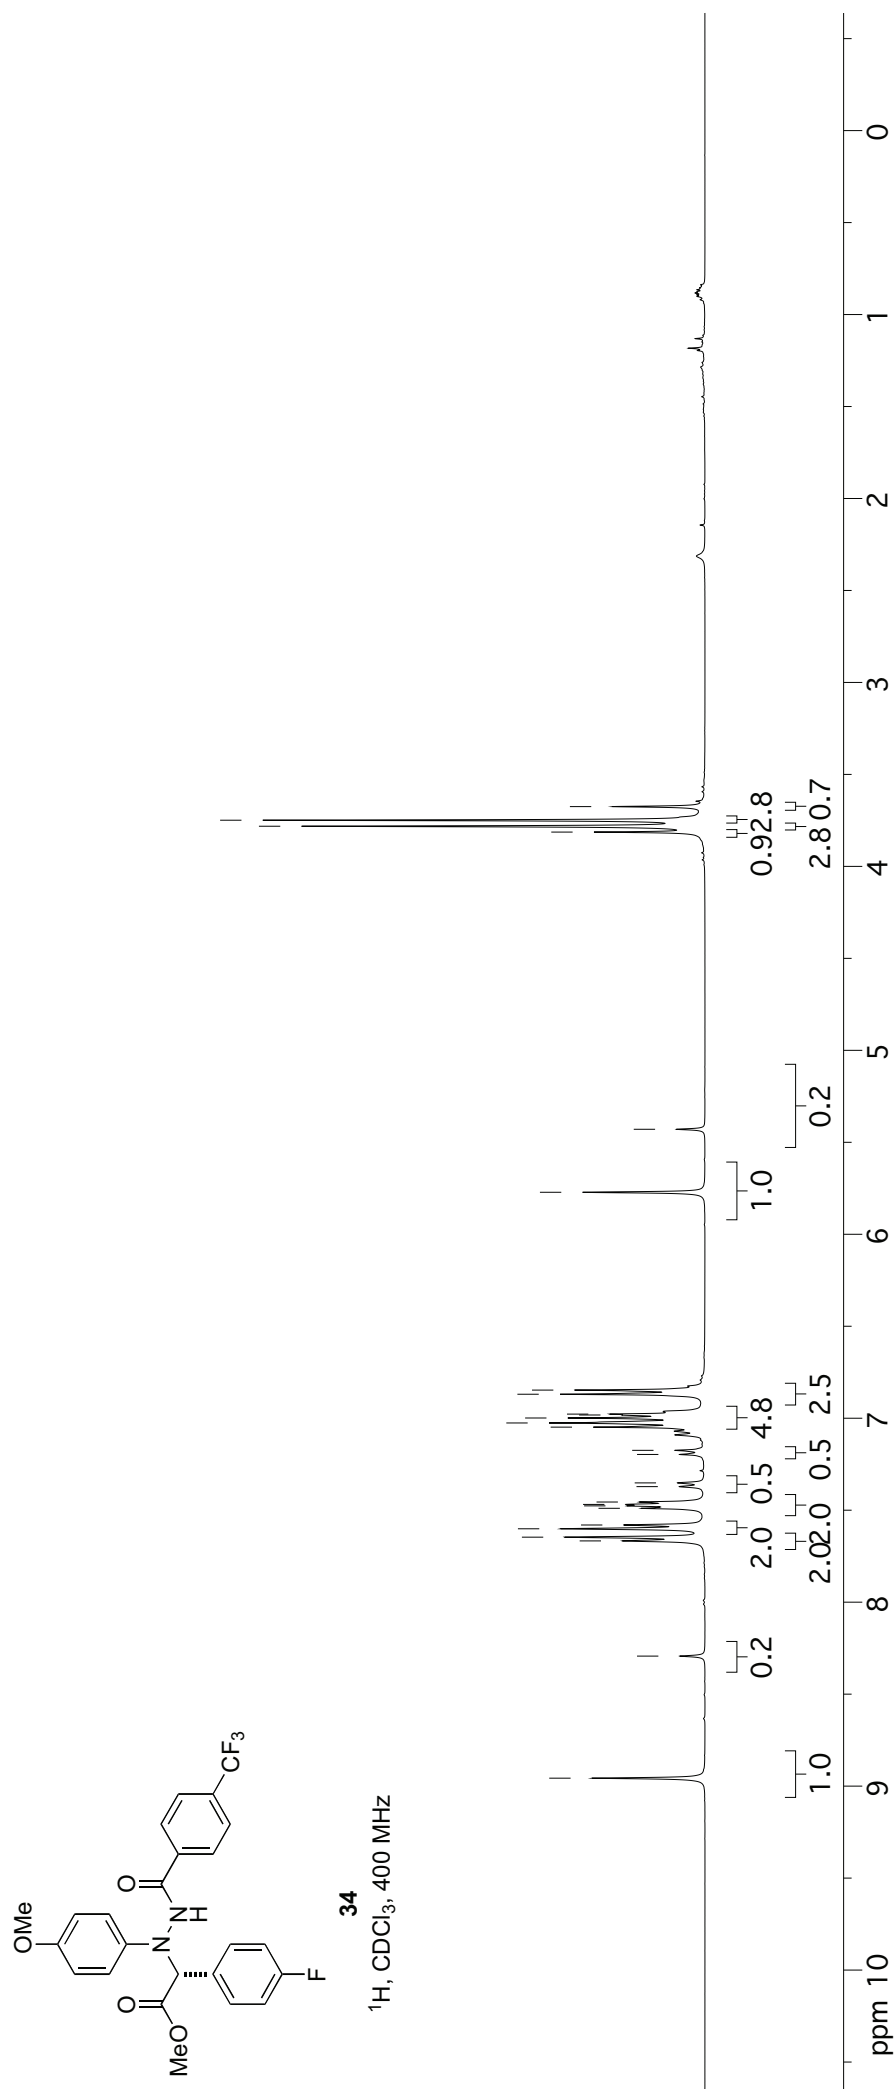

172.904  
172.010  
171.457  
165.379  
164.559  
164.493  
161.253  
161.202  
155.671  
155.313  
142.131  
141.887  
136.243  
136.165  
134.034  
133.601  
133.168  
132.733  
131.910  
131.797  
130.898  
130.787  
129.652  
129.610  
129.037  
128.699  
128.657  
128.188  
127.554  
125.634  
125.586  
125.540  
125.425  
124.058  
124.011  
121.814  
118.203  
117.747  
117.584  
115.802  
115.740  
115.513  
115.453  
115.124  
114.685  
77.626  
77.201  
76.774  
68.468  
67.108  
55.495  
55.447  
52.521  
52.407

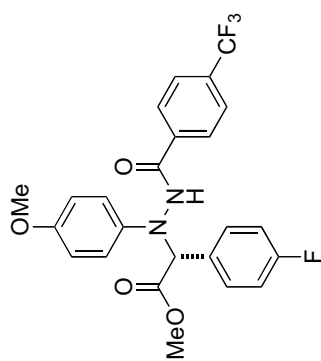

**34**

$^{13}\text{C}$ ,  $\text{CDCl}_3$ , 75 MHz

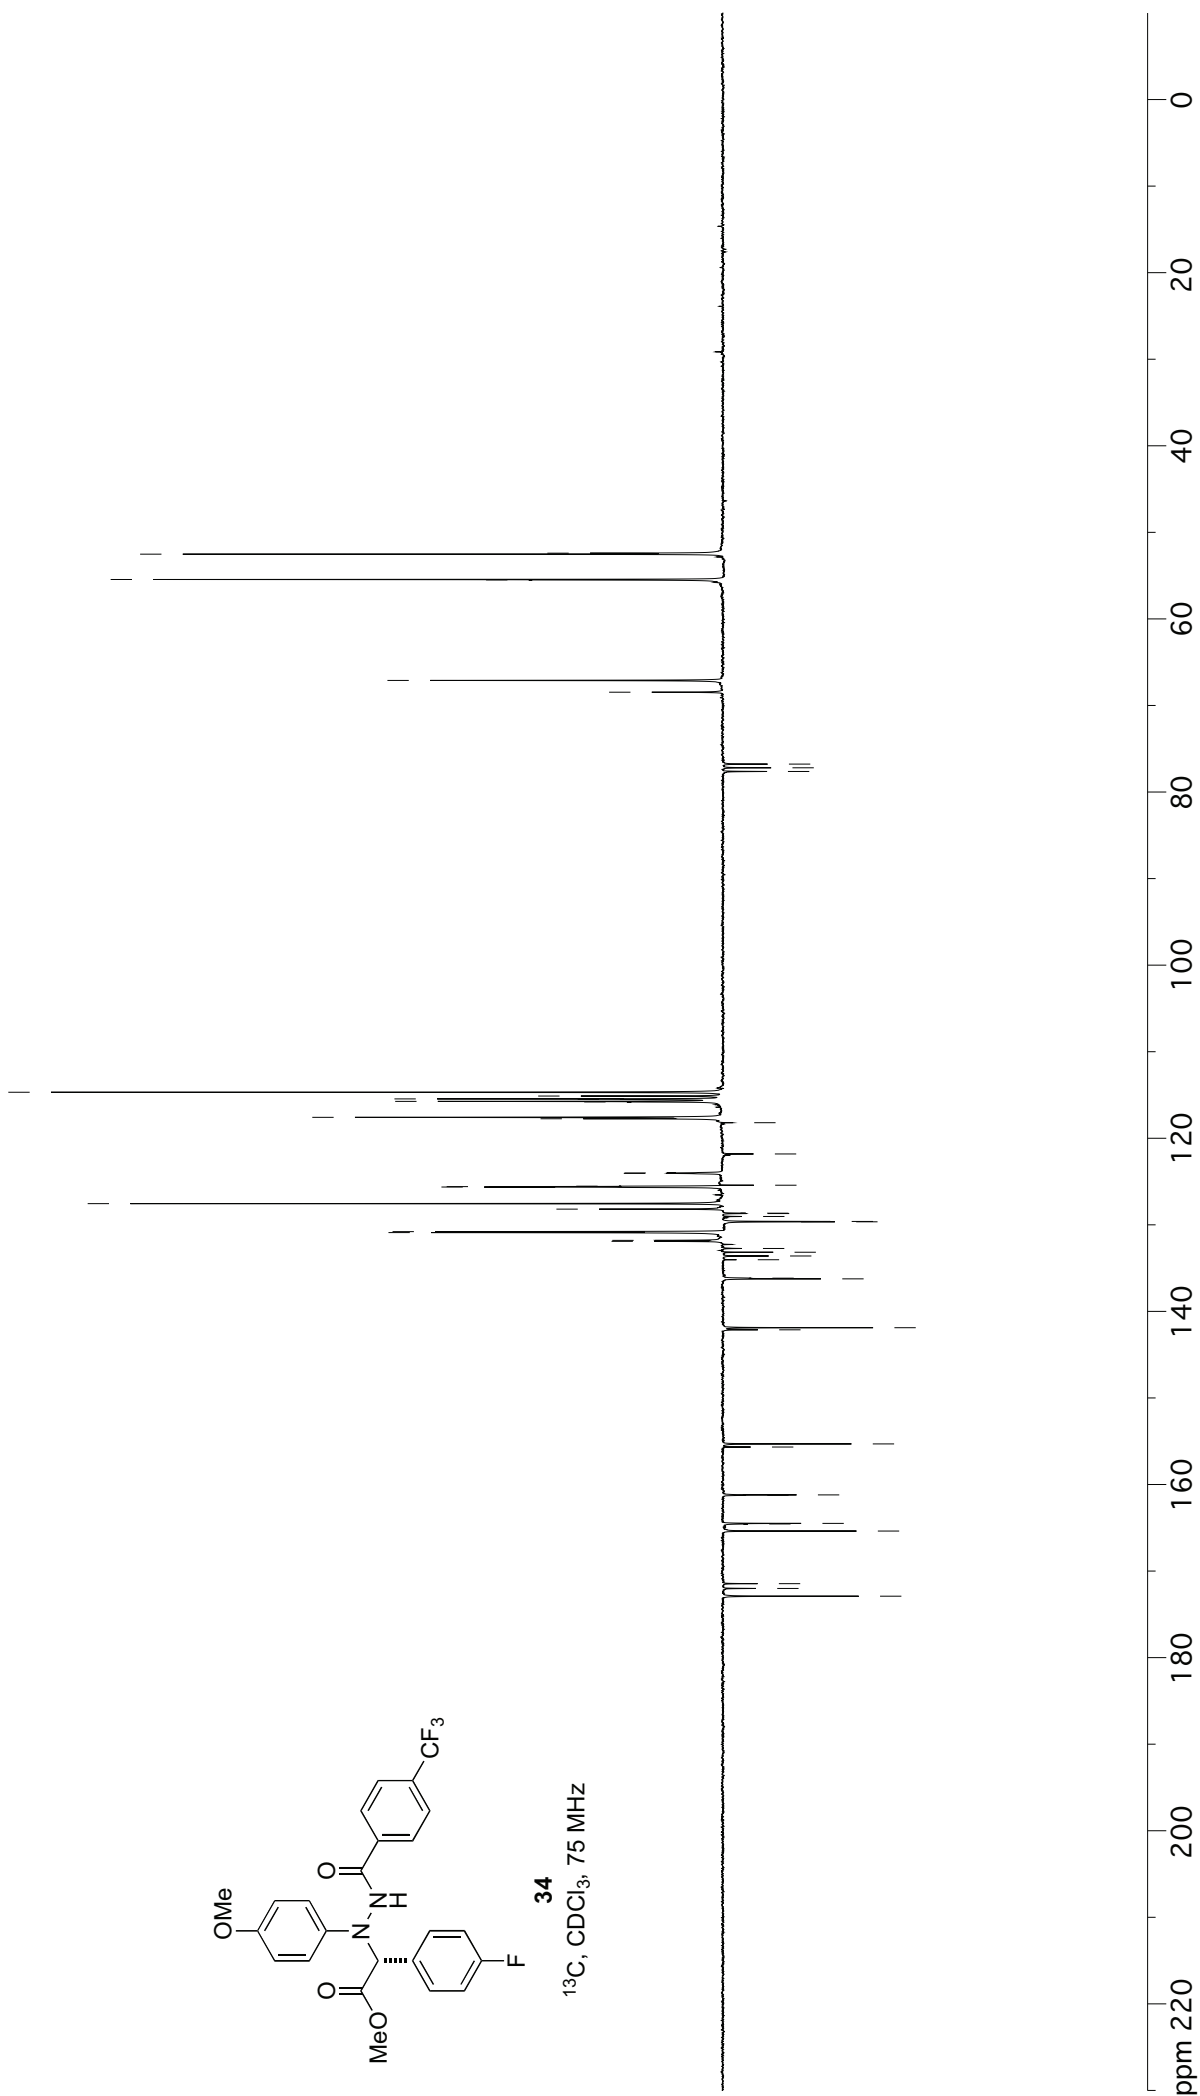



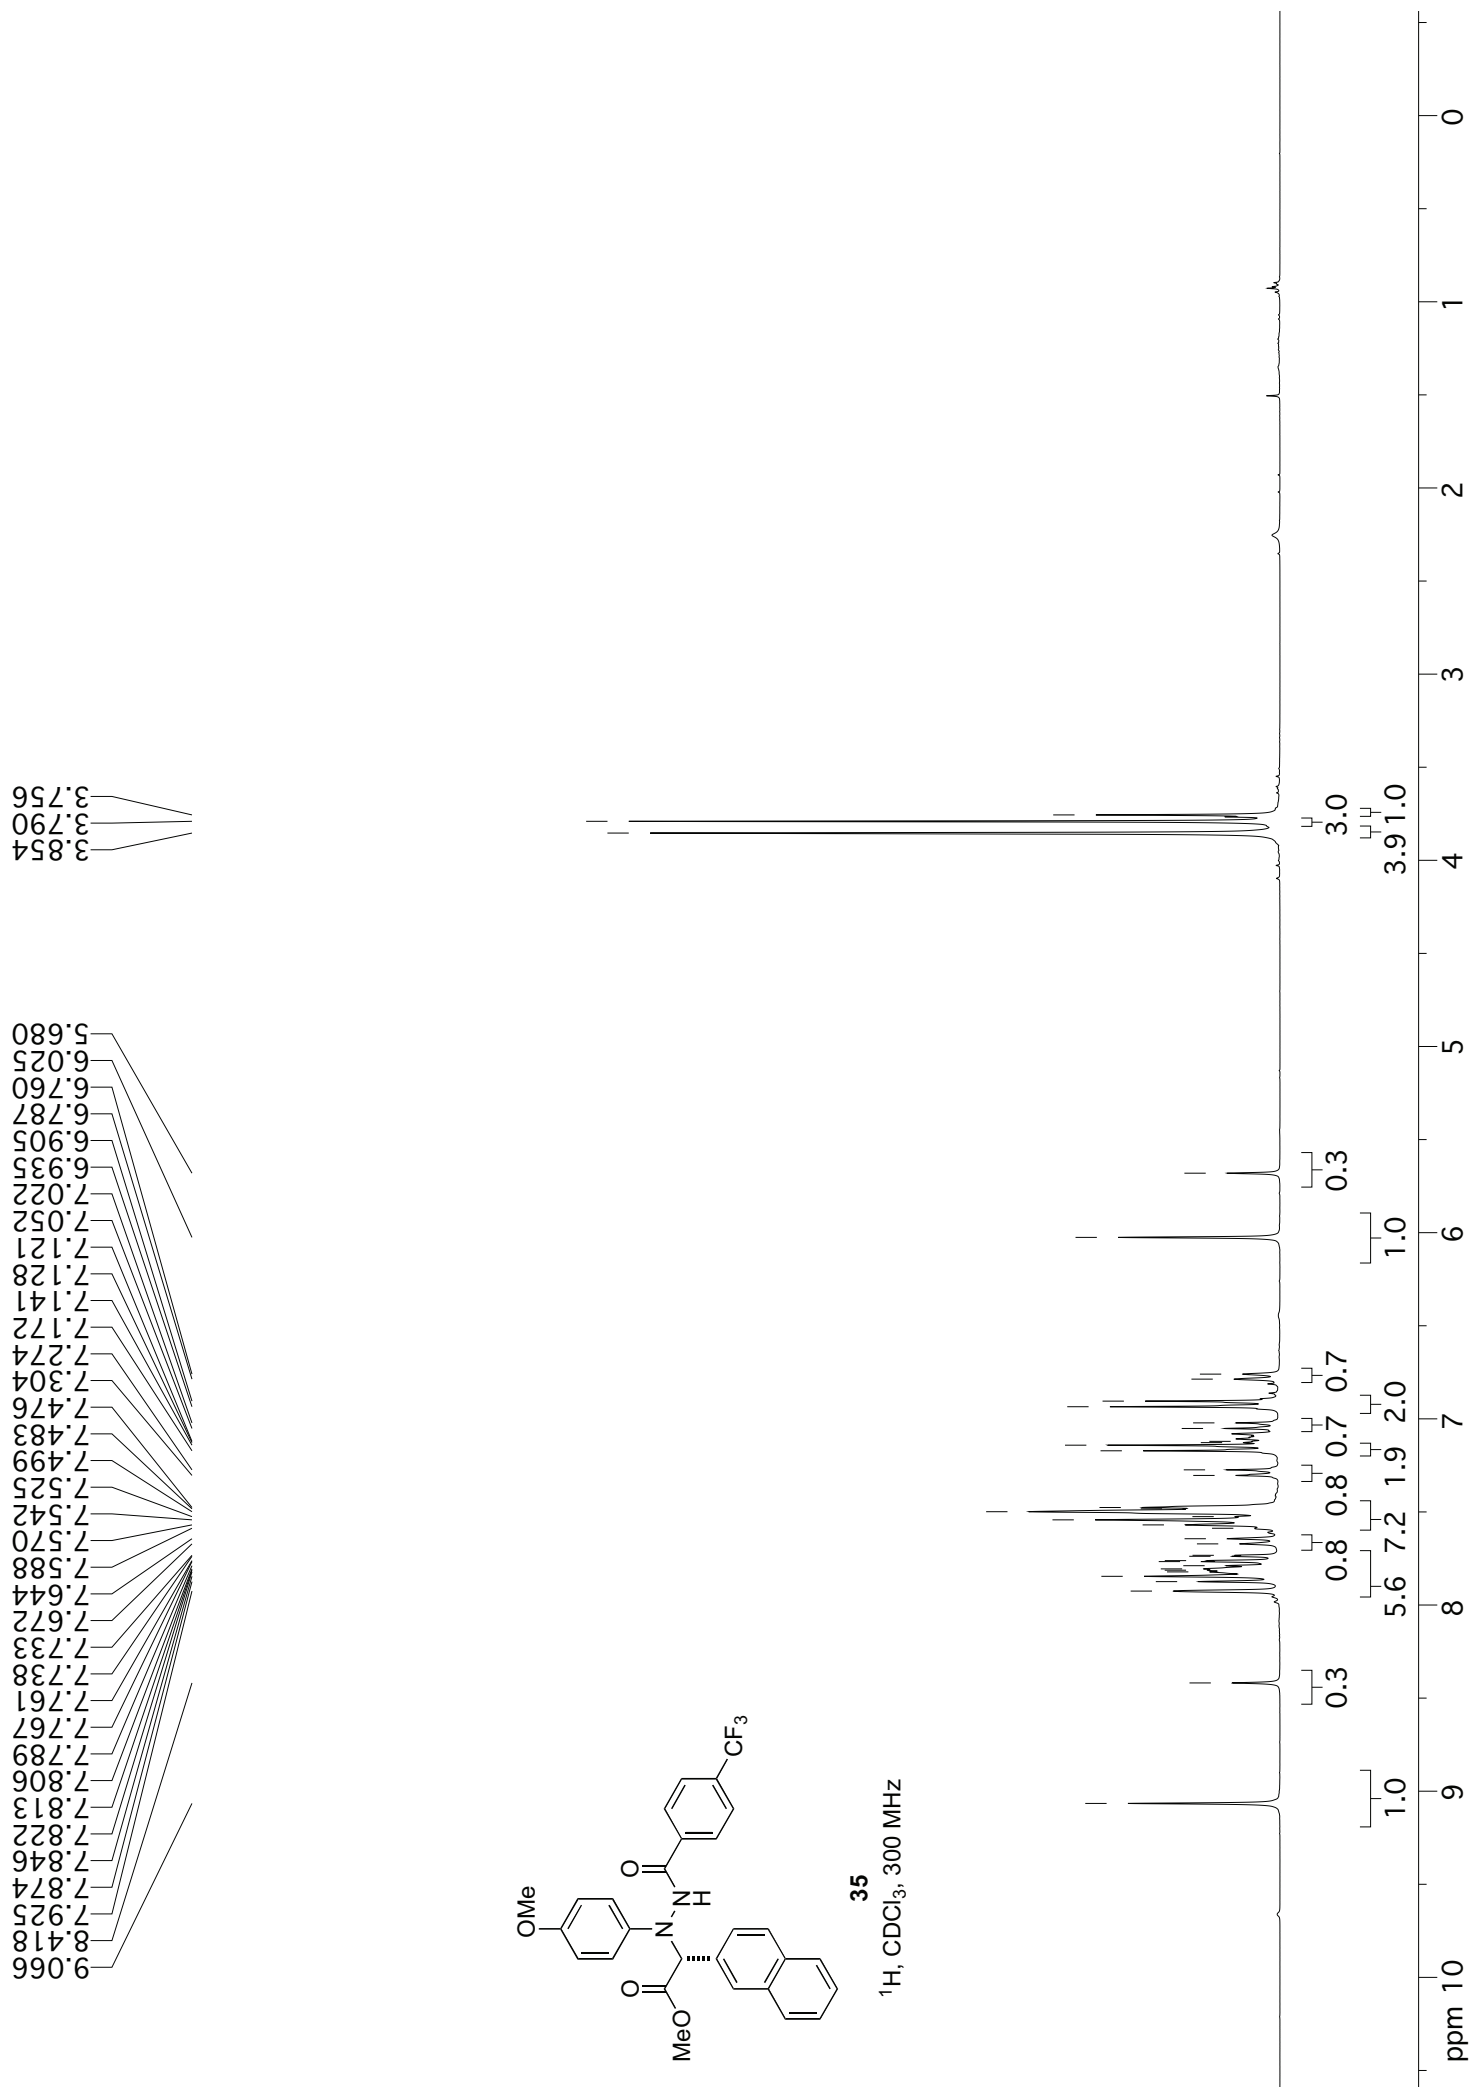

173.119  
172.093  
171.676  
165.536  
155.591  
155.336  
142.394  
142.155  
136.359  
135.987  
133.393  
133.314  
133.080  
133.000  
131.340  
130.070  
129.925  
128.612  
128.447  
128.176  
128.076  
127.927  
127.779  
127.510  
127.185  
126.761  
126.706  
126.631  
126.524  
125.507  
125.459  
125.410  
123.800  
123.753  
117.753  
117.628  
115.186  
114.737  
77.683  
77.258  
76.832  
69.240  
68.073  
55.577  
55.511  
52.577  
52.457

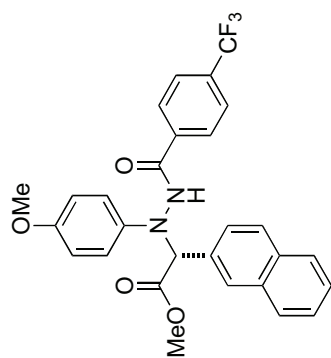

**35**  
 $^{13}\text{C}$ ,  $\text{CDCl}_3$ , 75 MHz

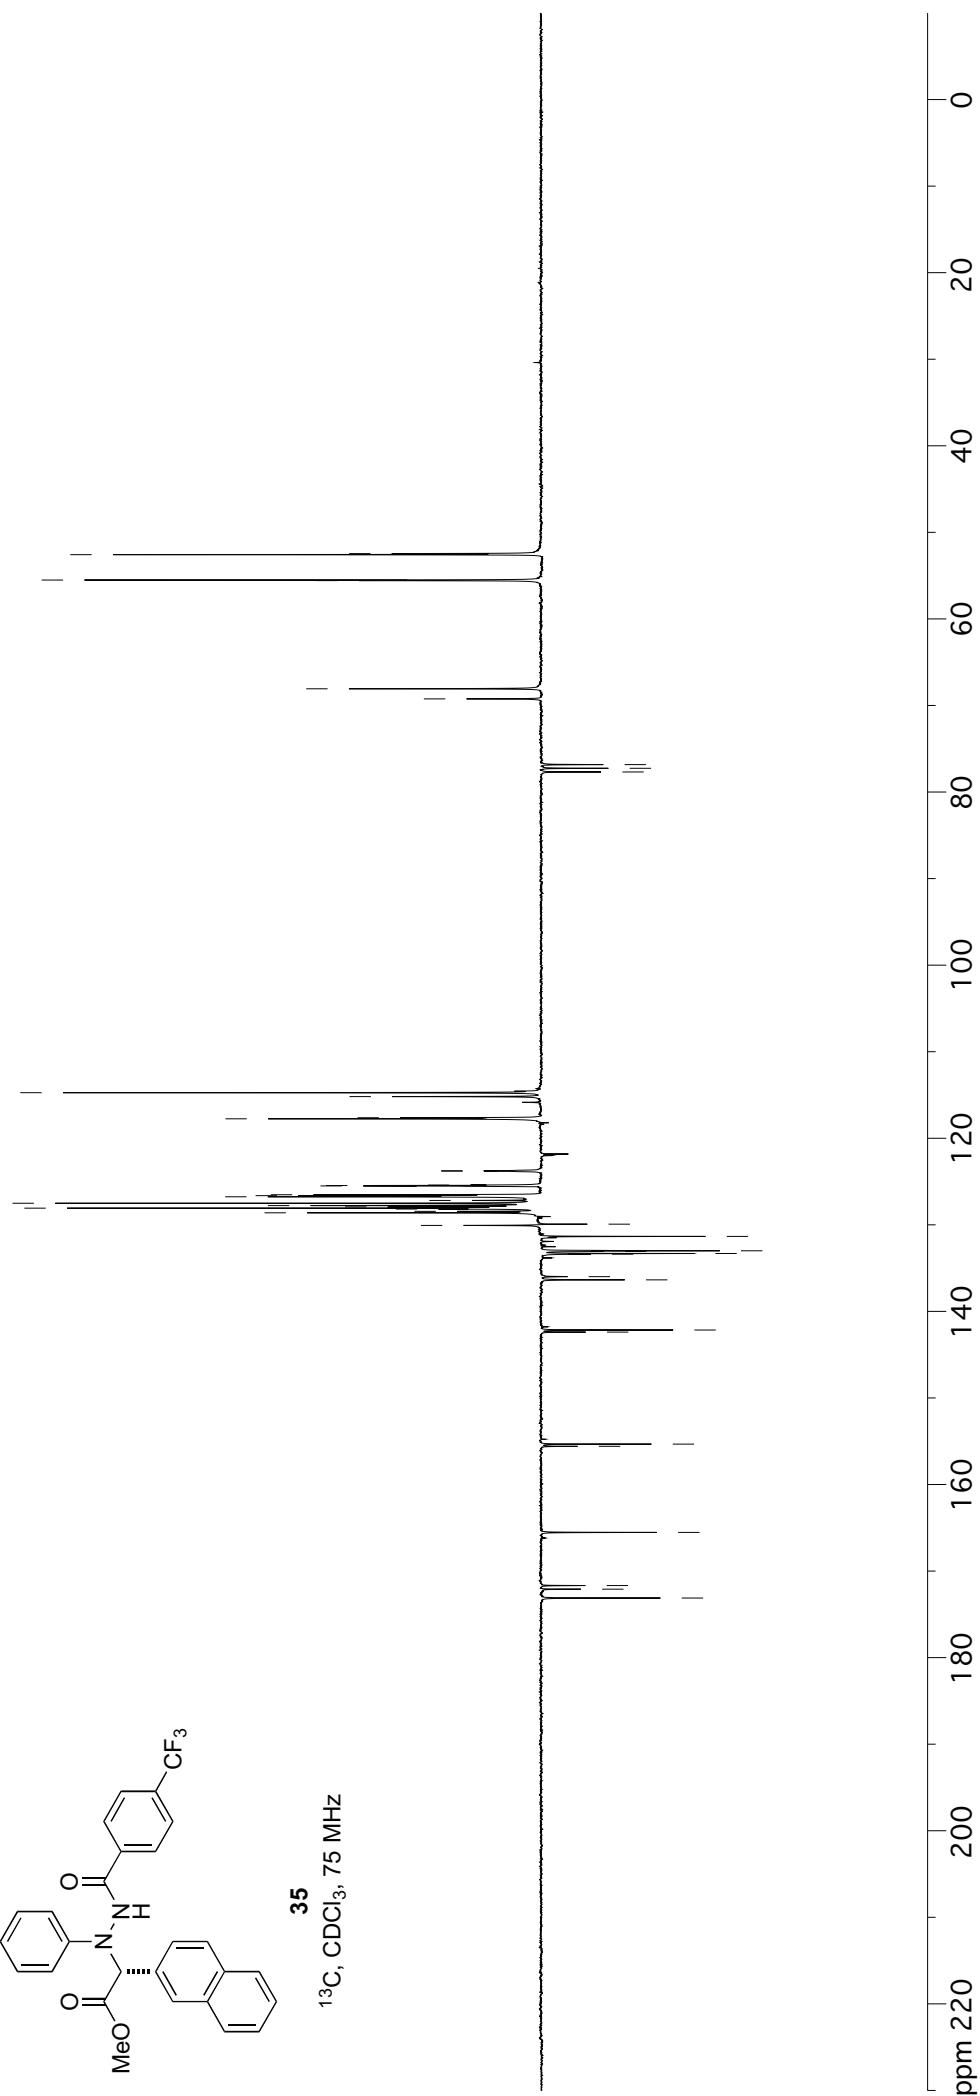

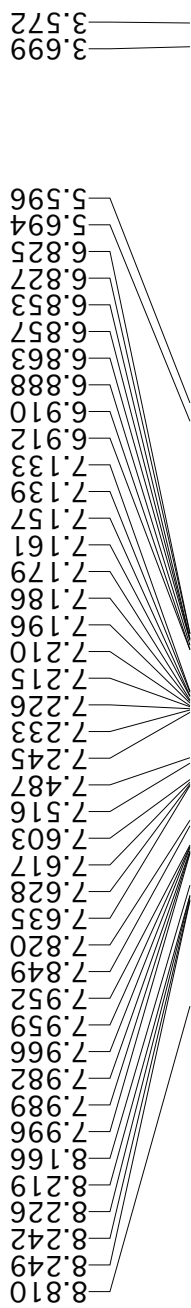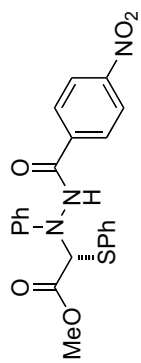

**36**

<sup>1</sup>H, CDCl<sub>3</sub>, 300 MHz

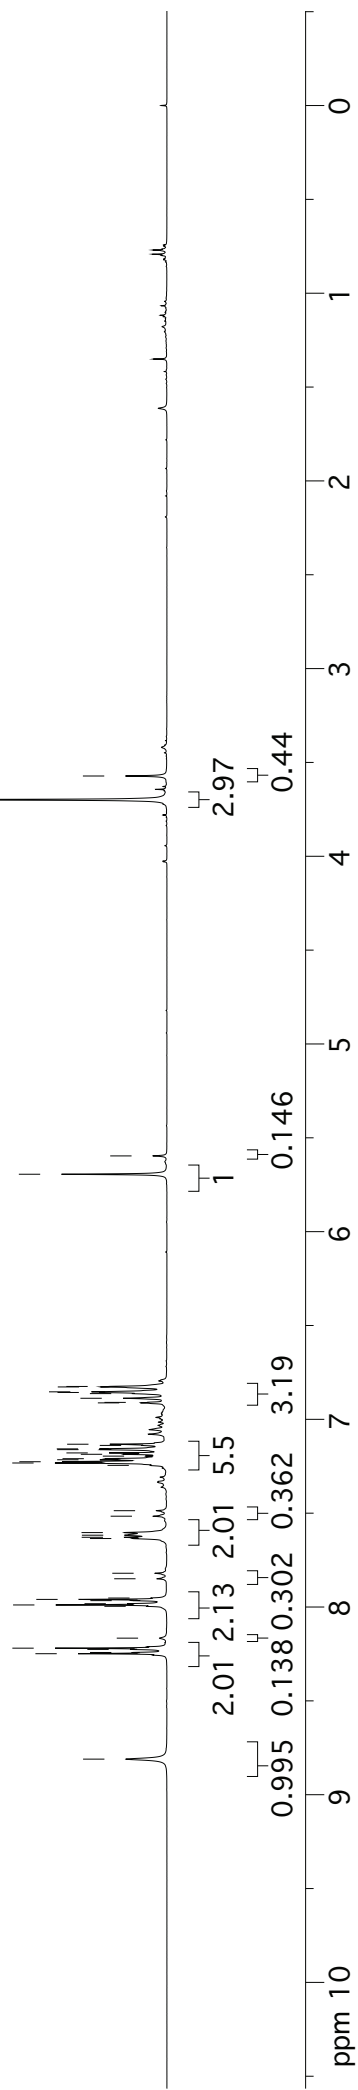

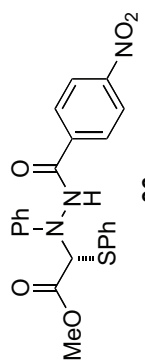

$^{13}\text{C}$ ,  $\text{CDCl}_3$ , 100 MHz

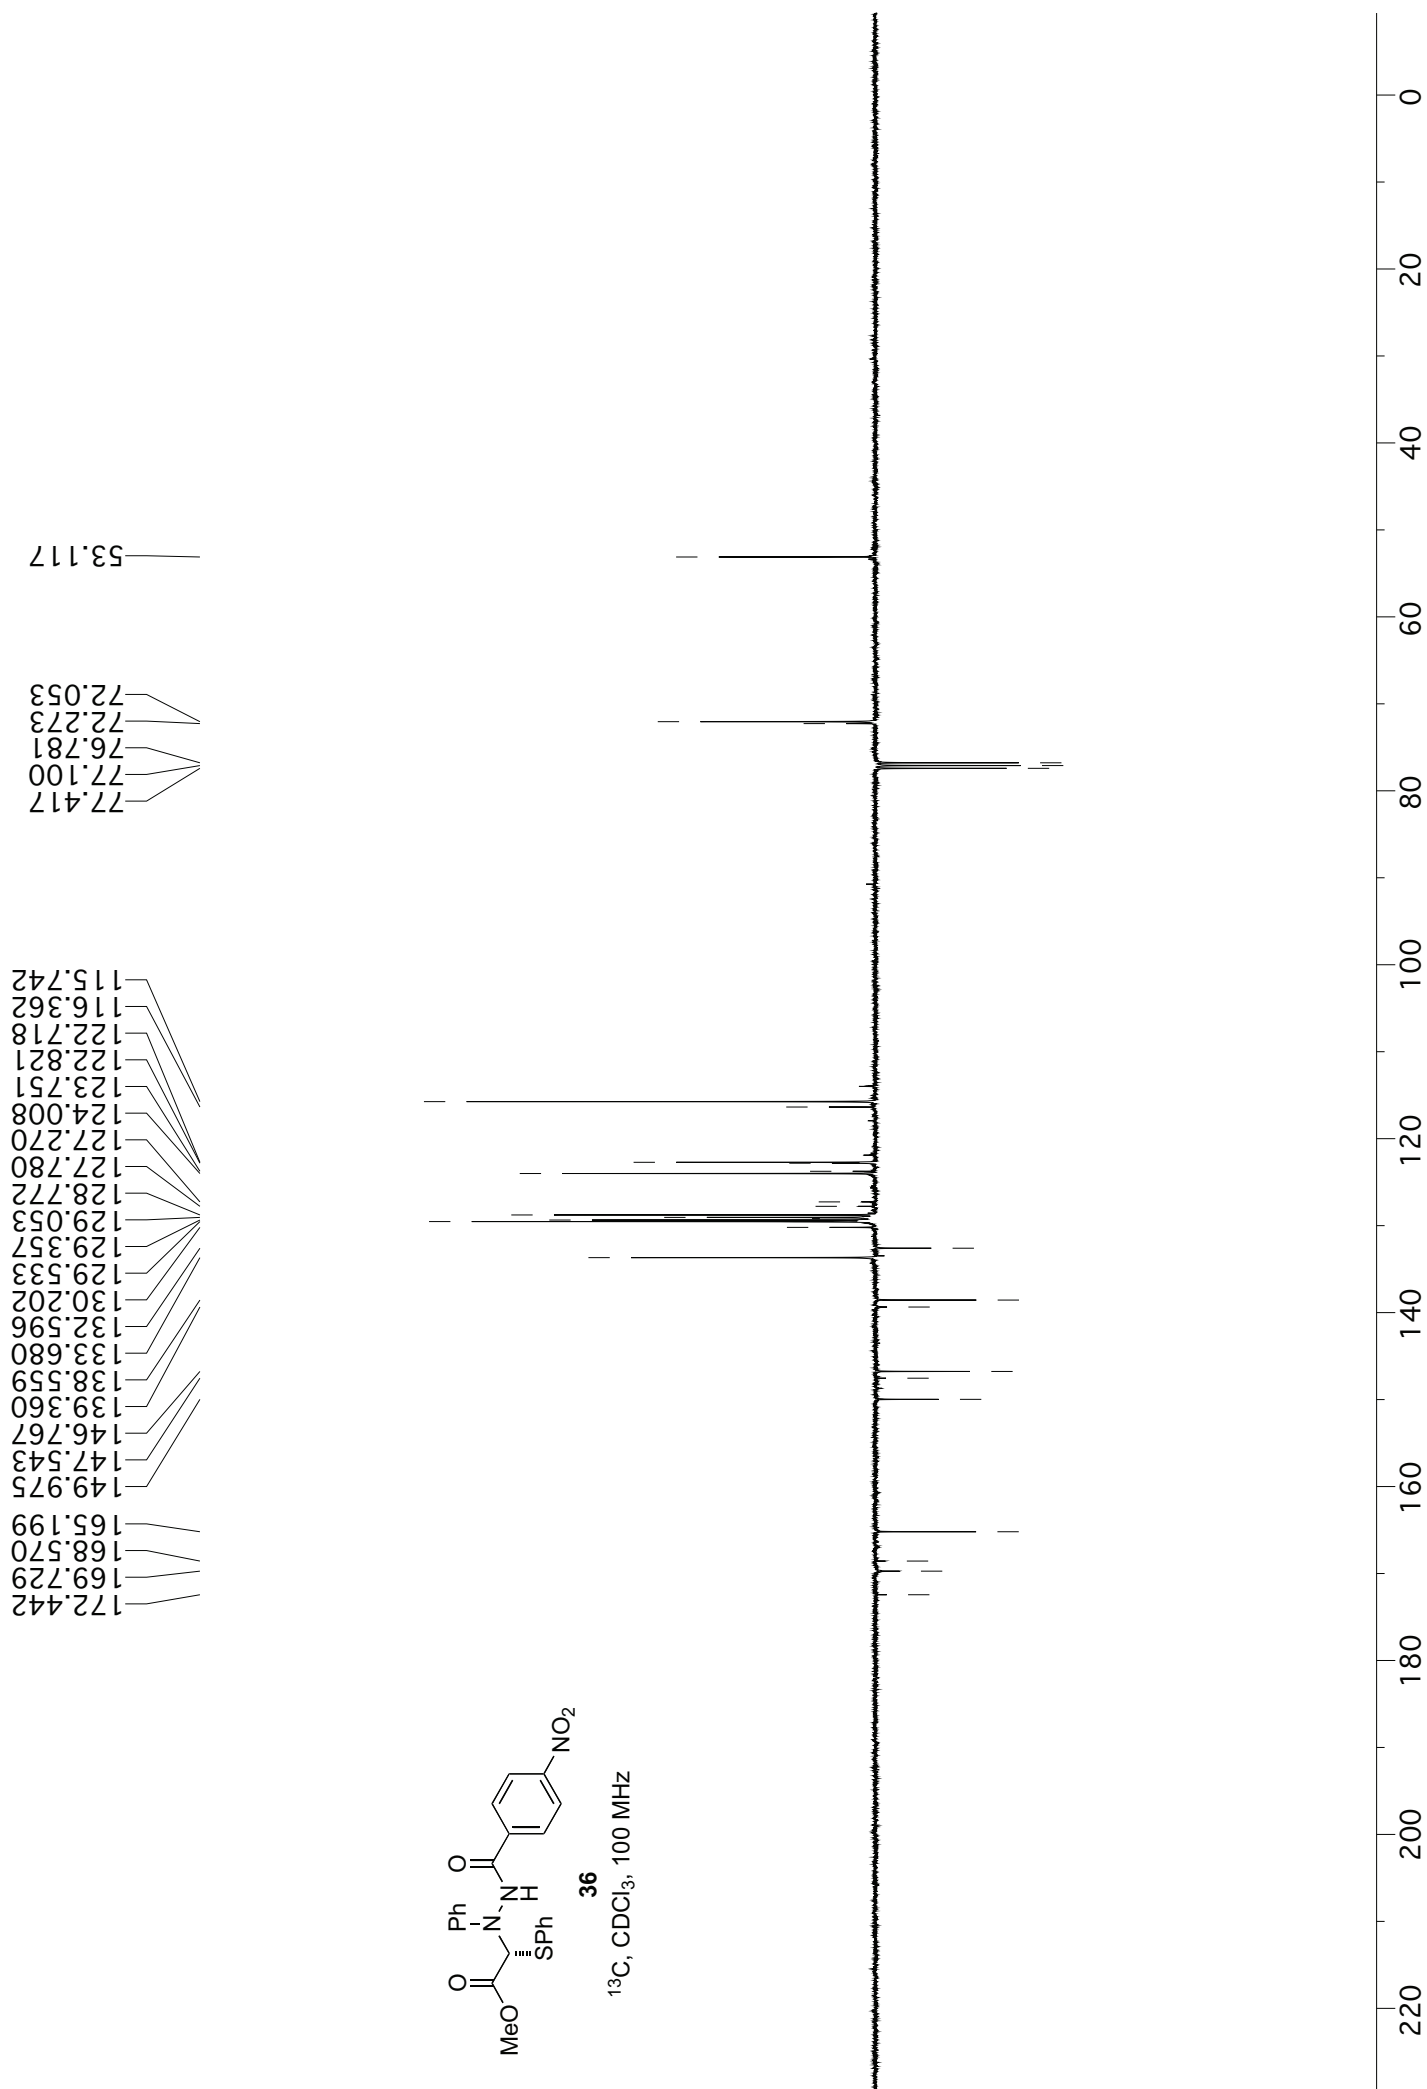



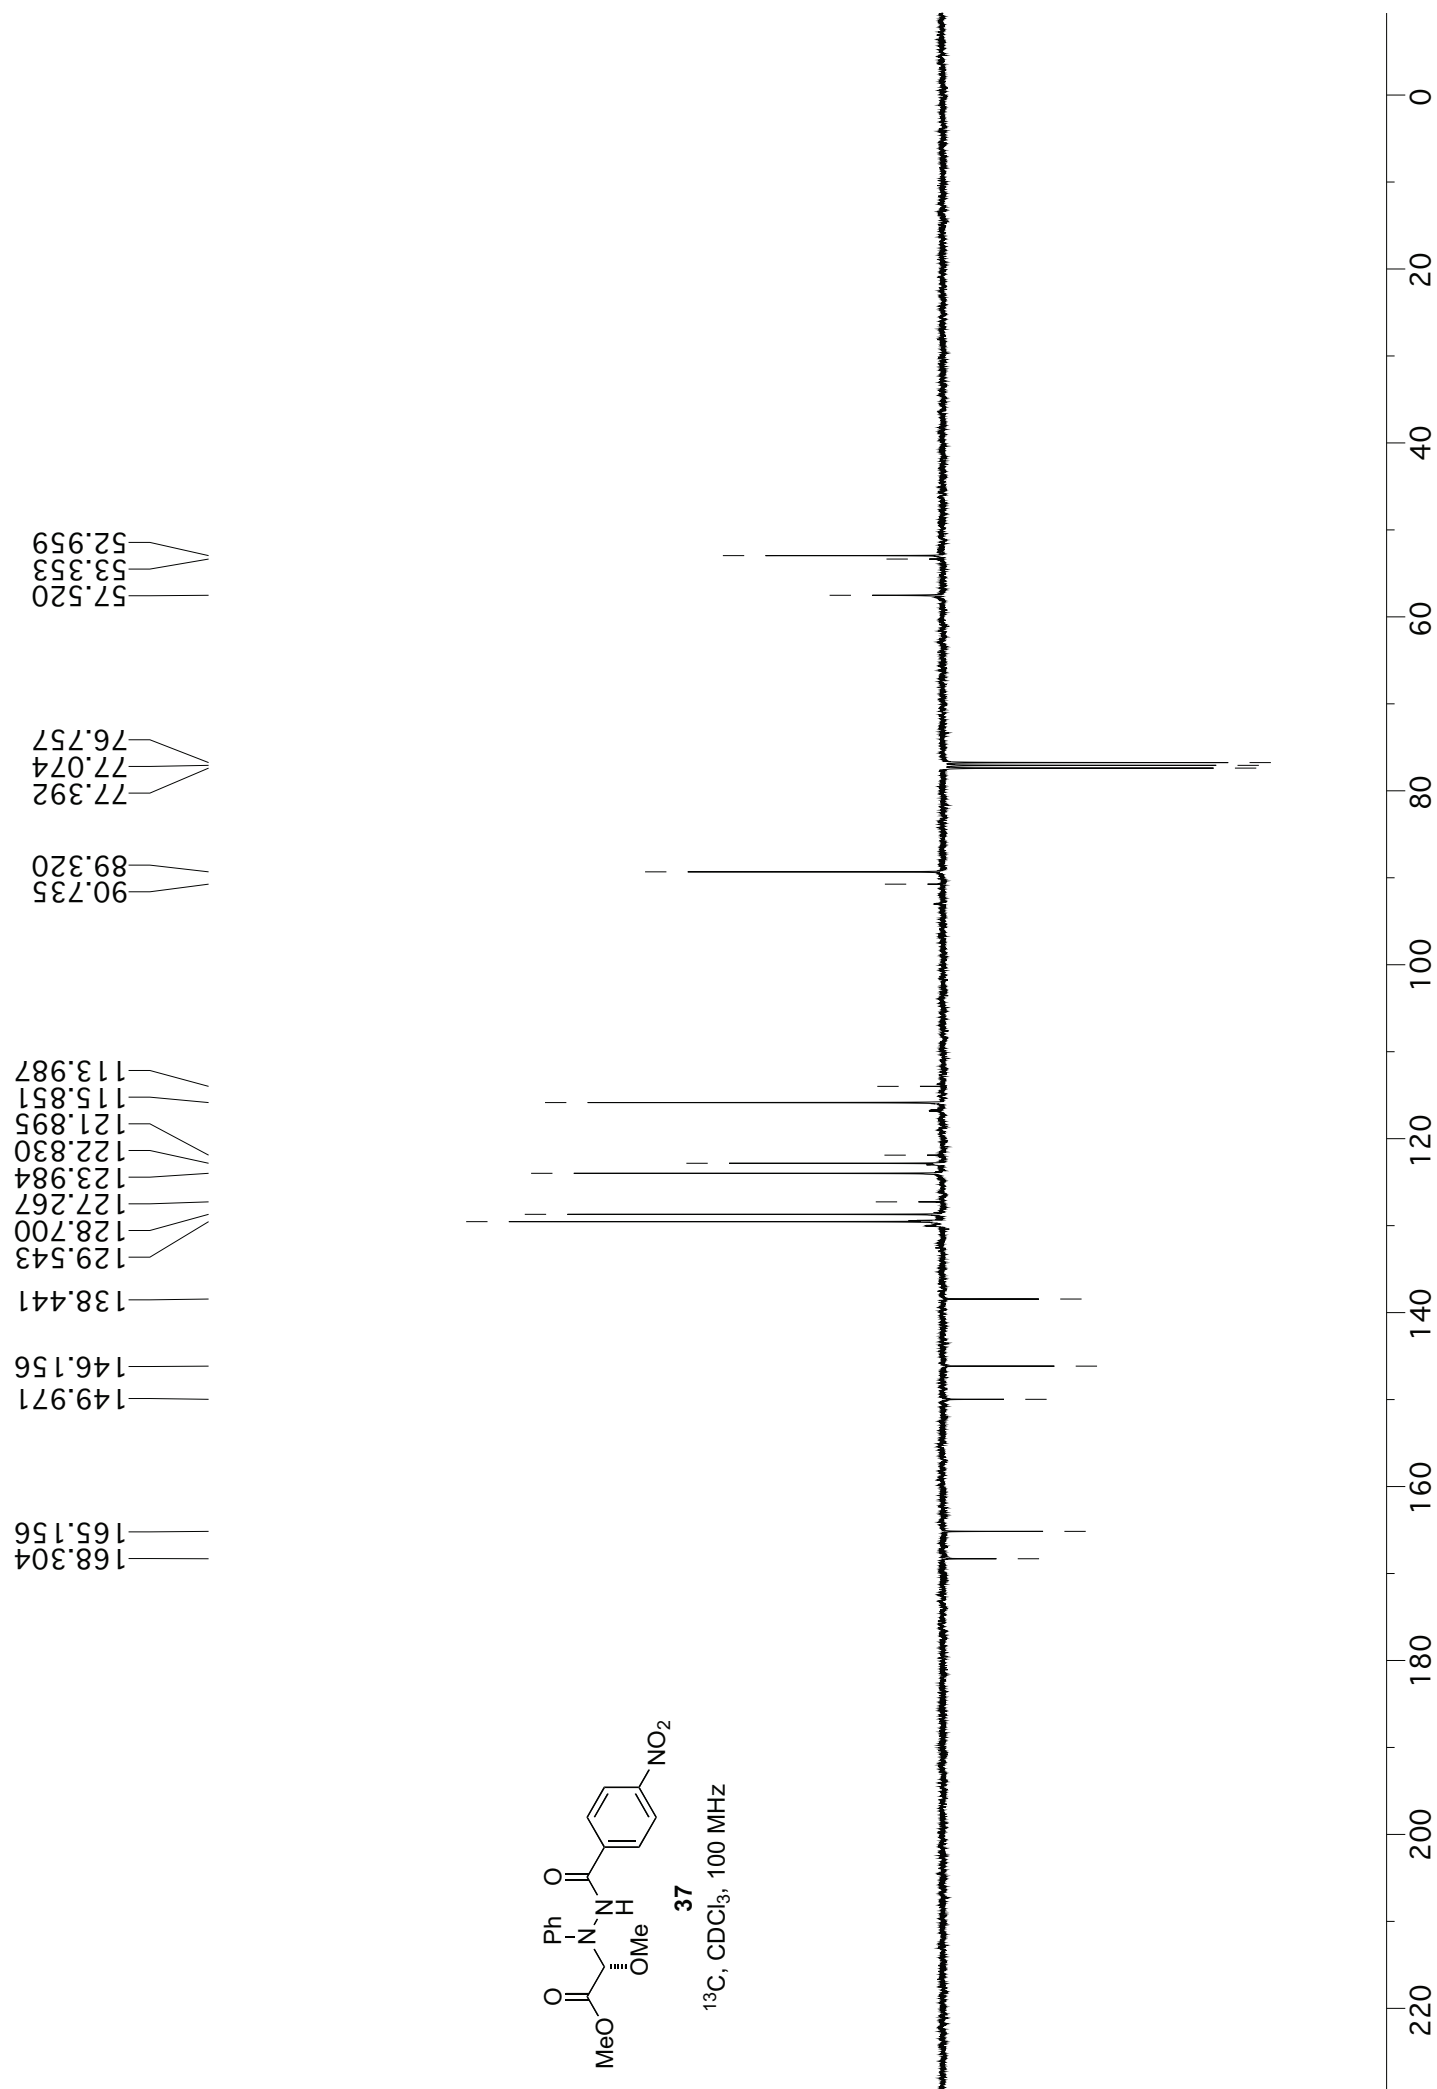

8.859  
8.289  
8.284  
8.272  
8.267  
8.261  
8.197  
8.020  
8.015  
8.010  
7.997  
7.992  
7.987  
7.859  
7.854  
7.841  
7.836  
7.433  
7.411  
7.262  
7.258  
7.244  
7.242  
7.238  
7.229  
7.221  
7.216  
7.211  
7.206  
7.197  
7.193  
7.189  
7.185  
7.179  
7.176  
7.171  
7.165  
7.162  
6.915  
6.913  
6.897  
6.881  
6.878  
6.876  
6.860  
6.857  
6.852  
6.840  
6.838  
6.835  
6.829  
4.724  
4.709  
4.703  
4.688  
3.524  
3.468  
3.410  
3.394  
3.376  
3.360  
3.123  
3.102  
3.089  
3.068

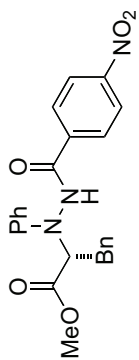

<sup>1</sup>H, CDCl<sub>3</sub>, 400 MHz

0.889 0.142 0.218 7.07  
1.8 1.9 0.284 2.98  
2.70.937  
0.306 0.917

ppm 10 9 8 7 6 5 4 3 2 1 0

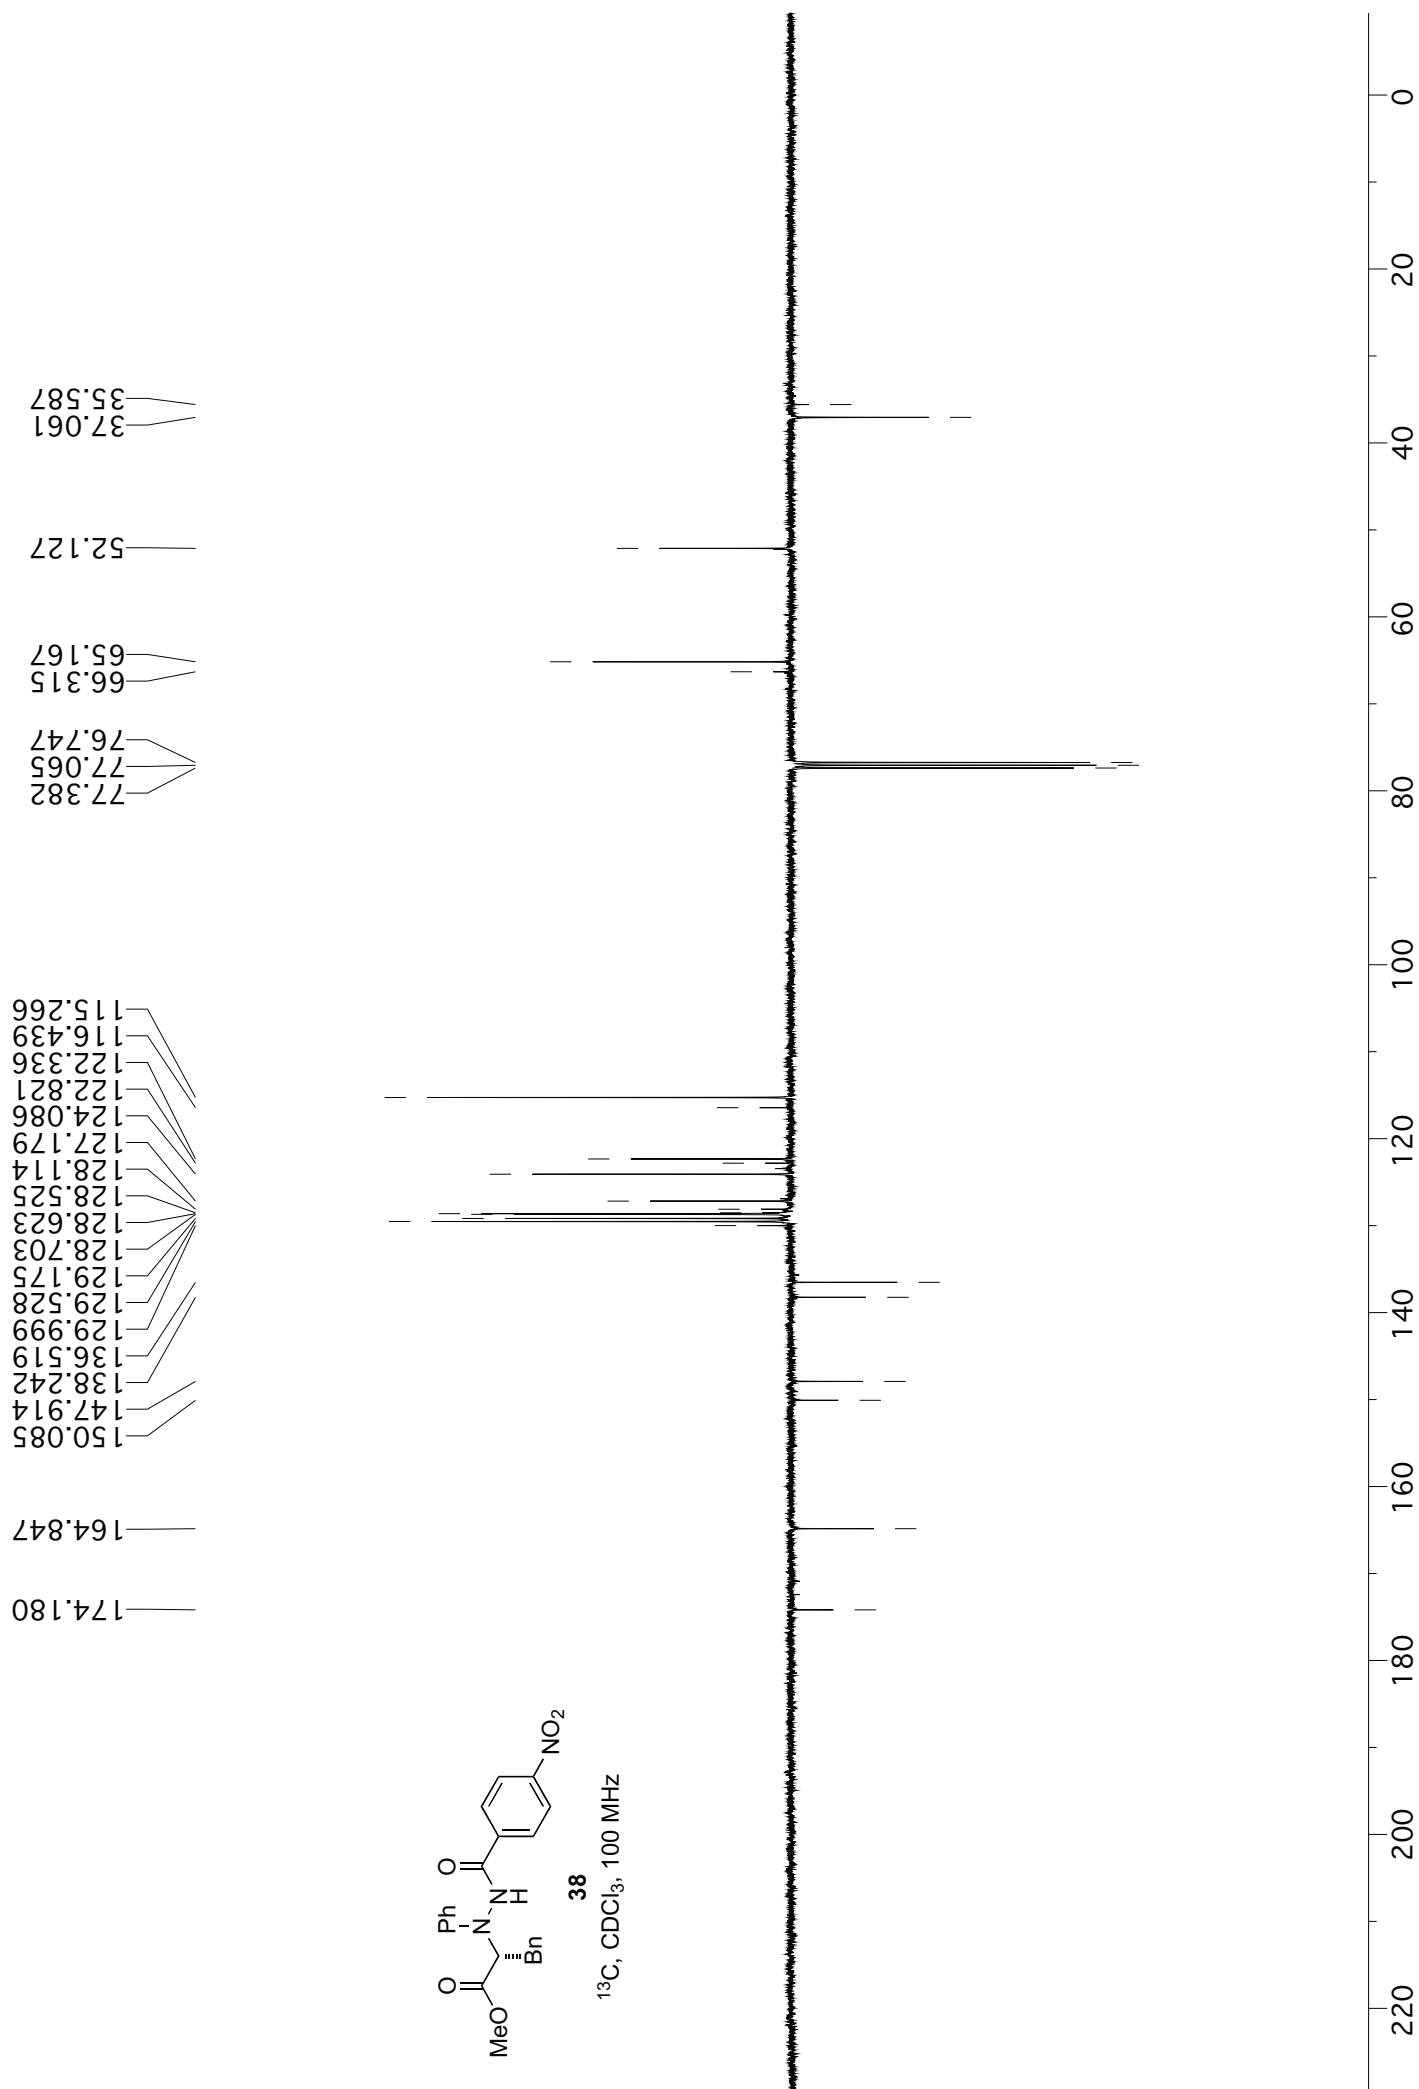



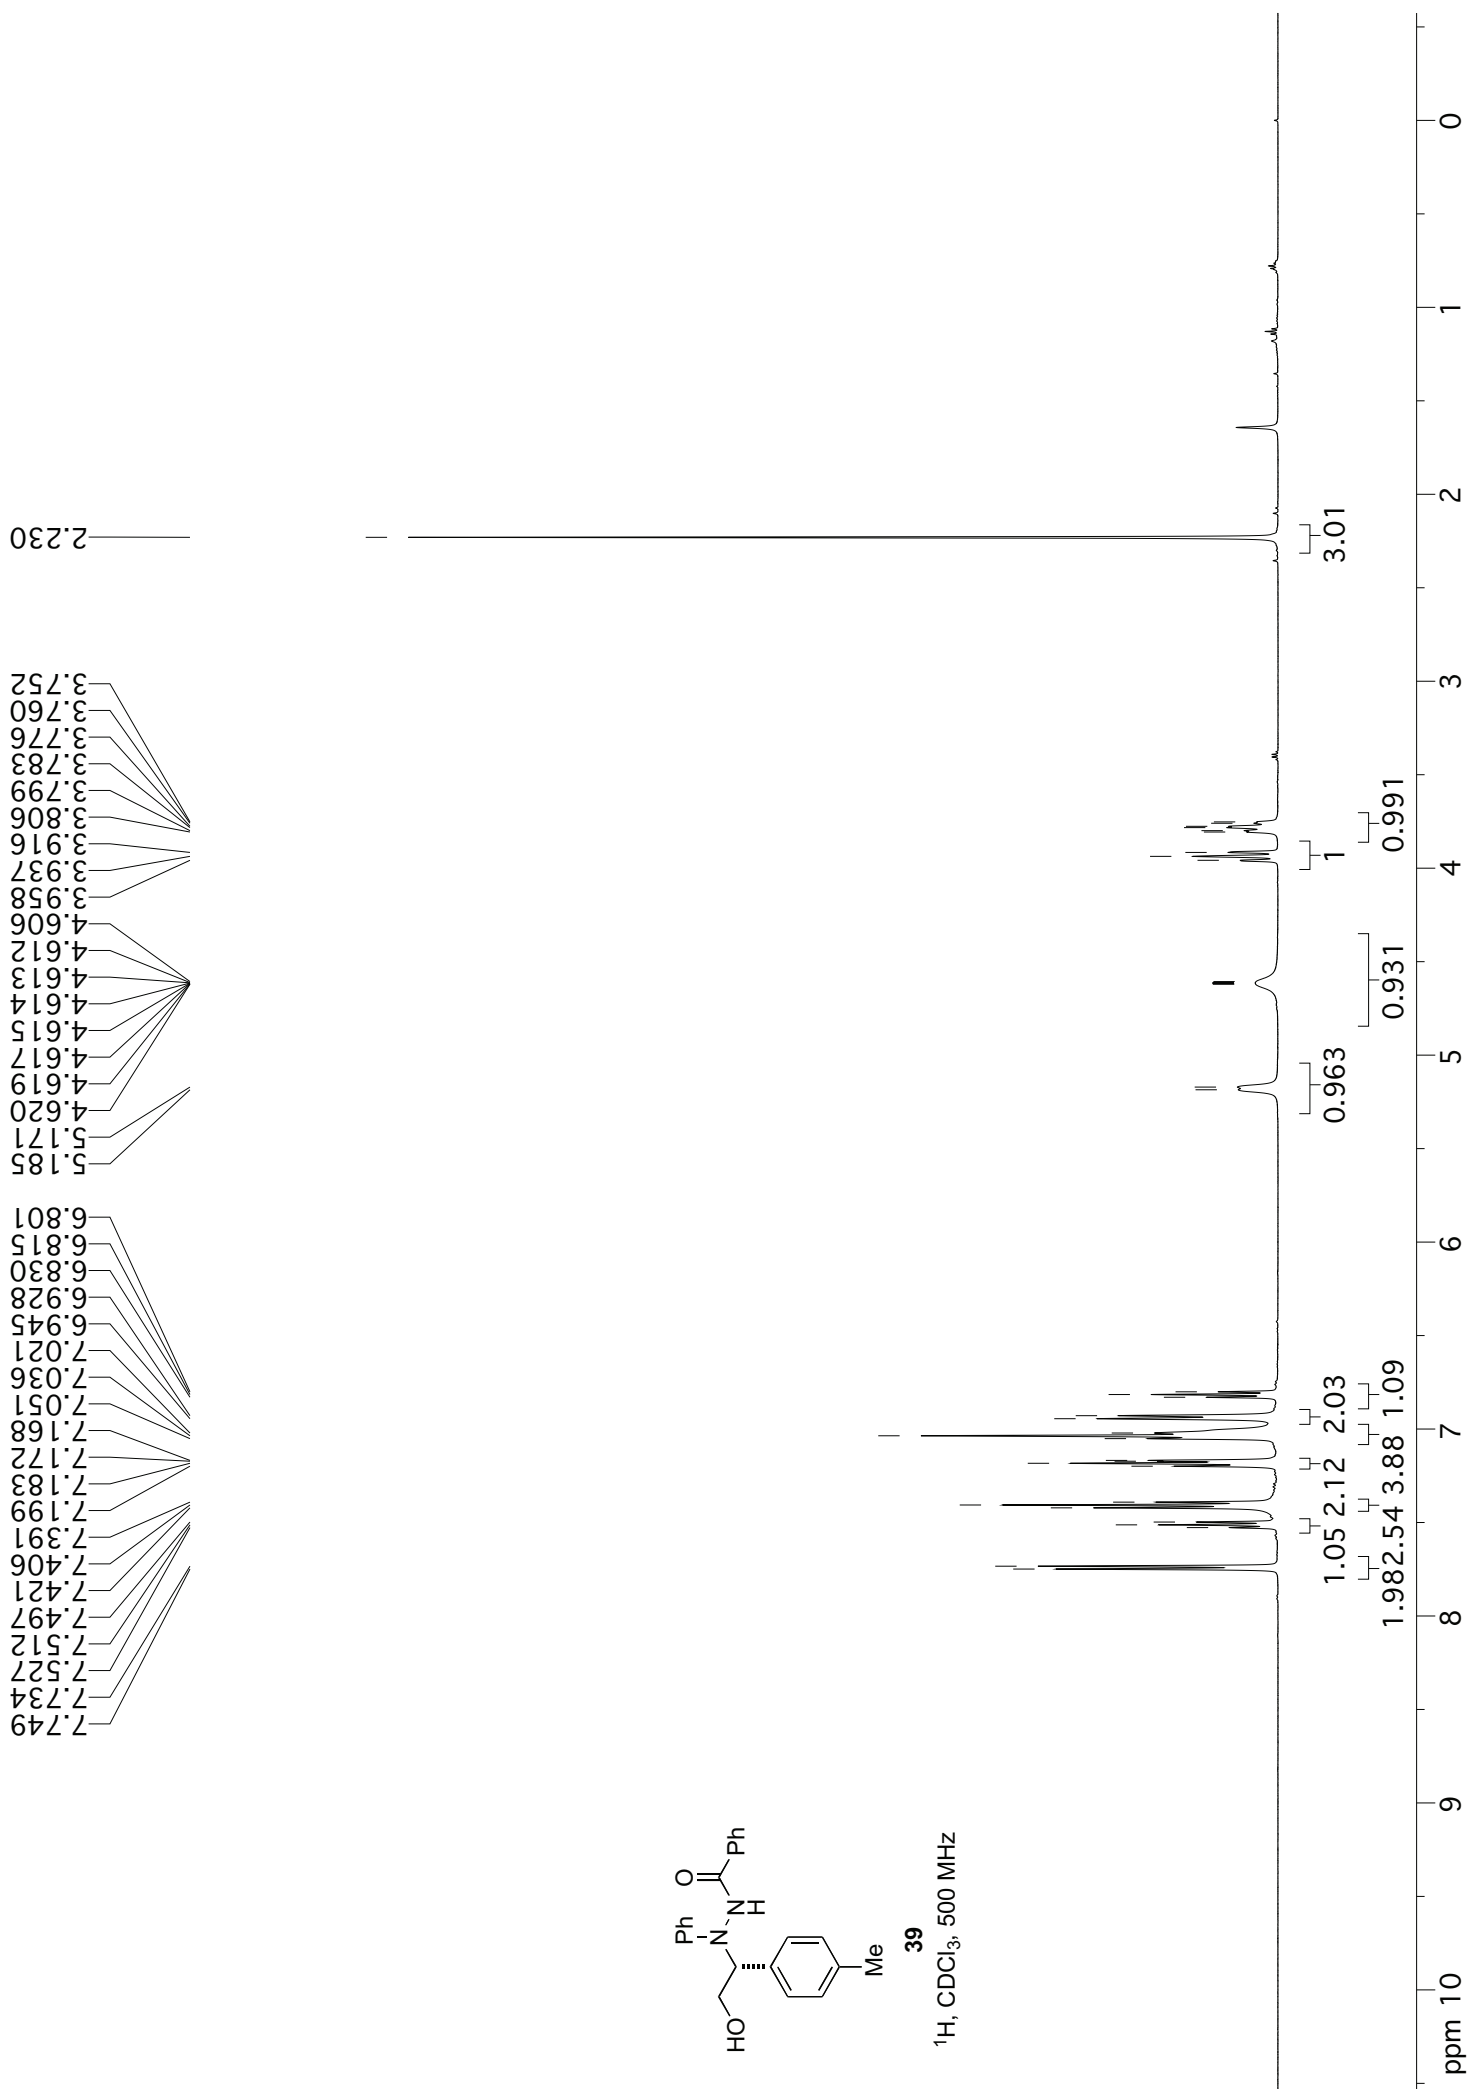

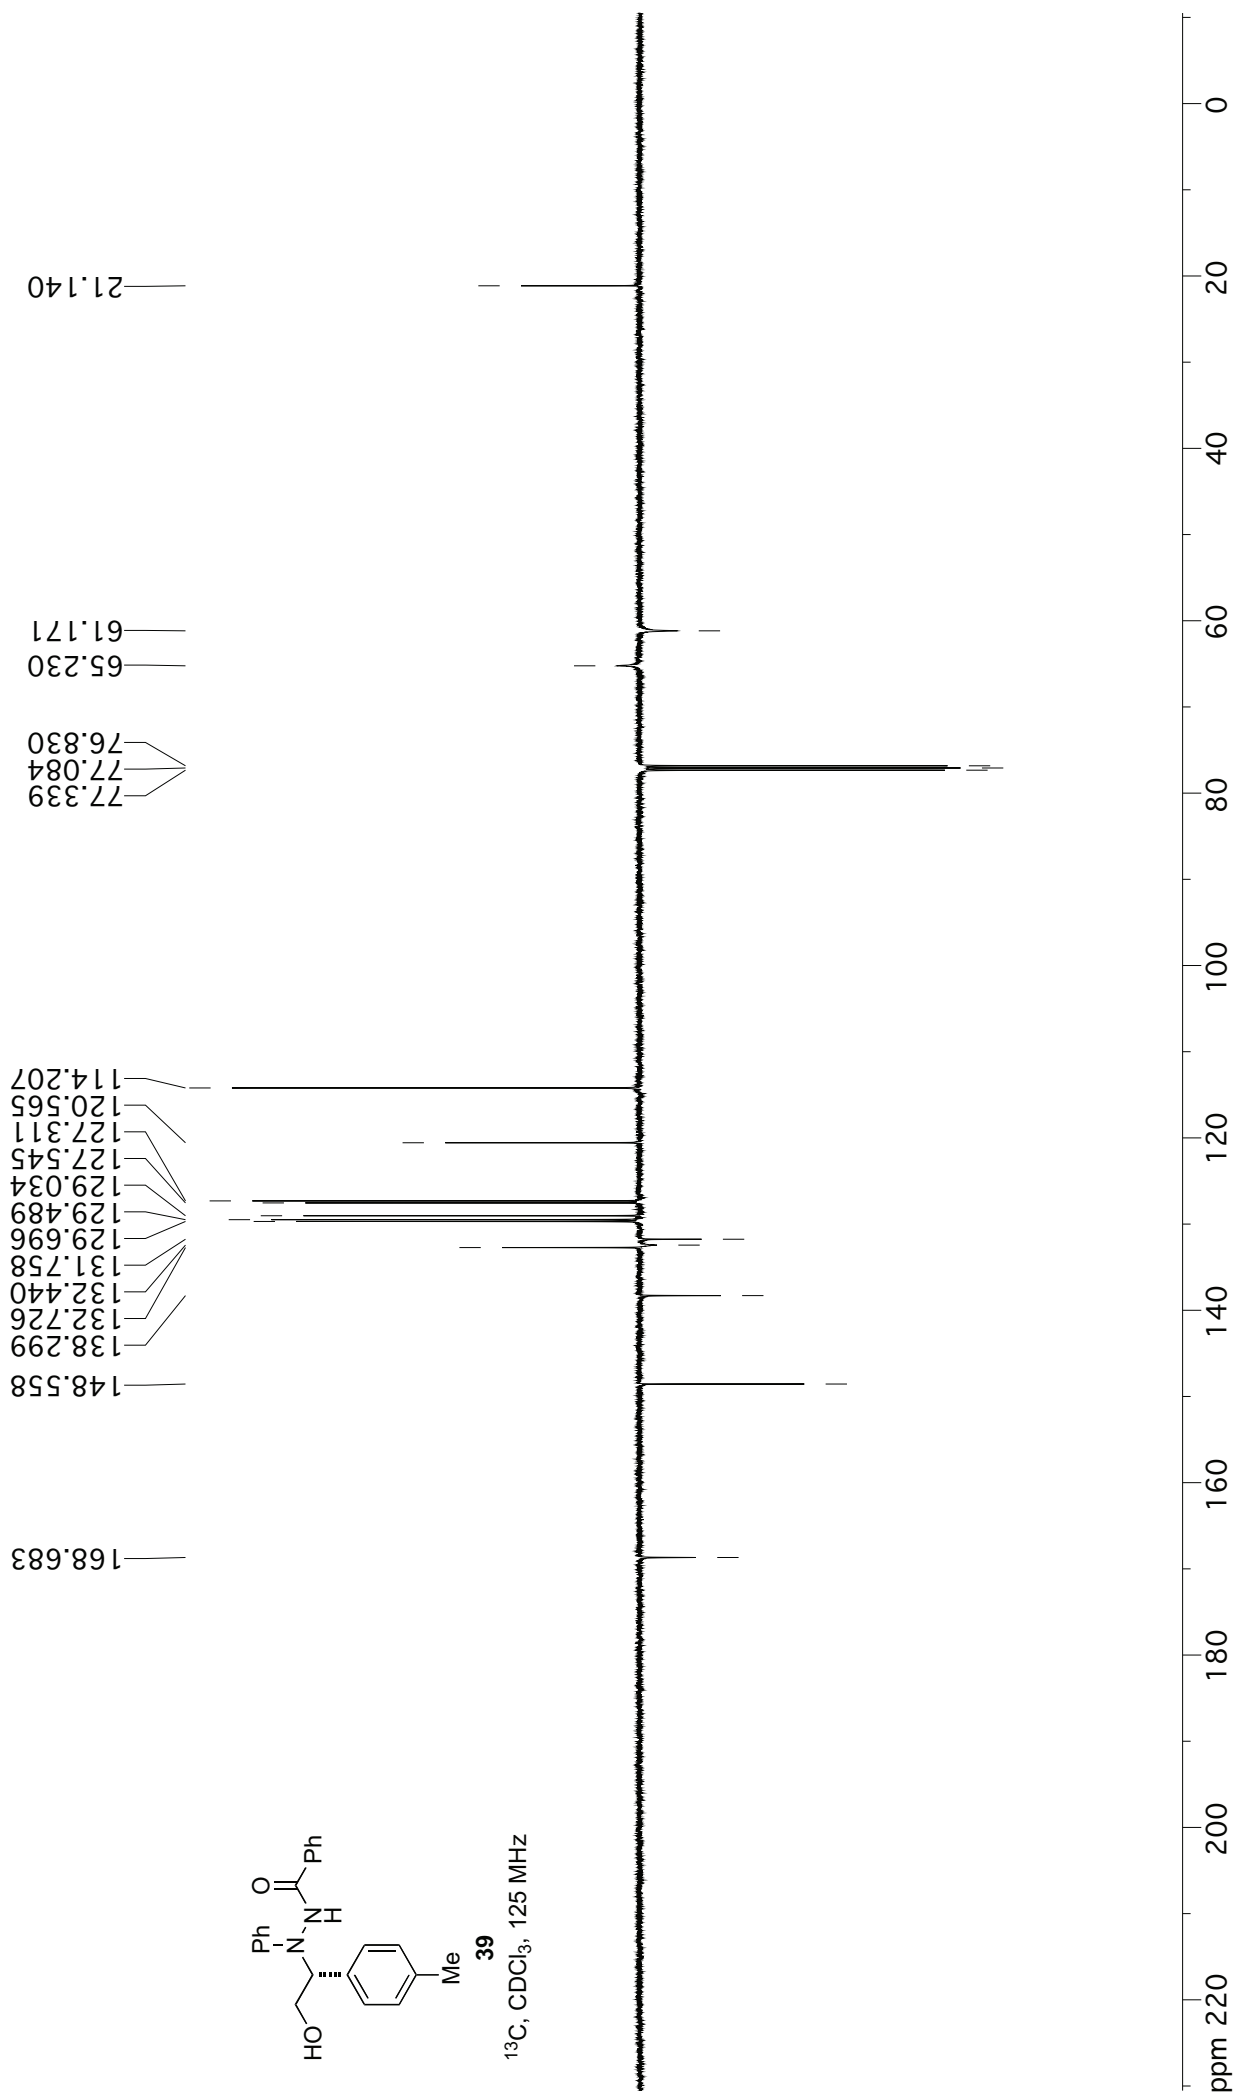

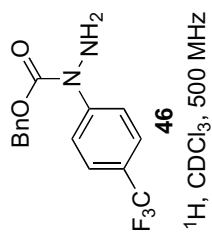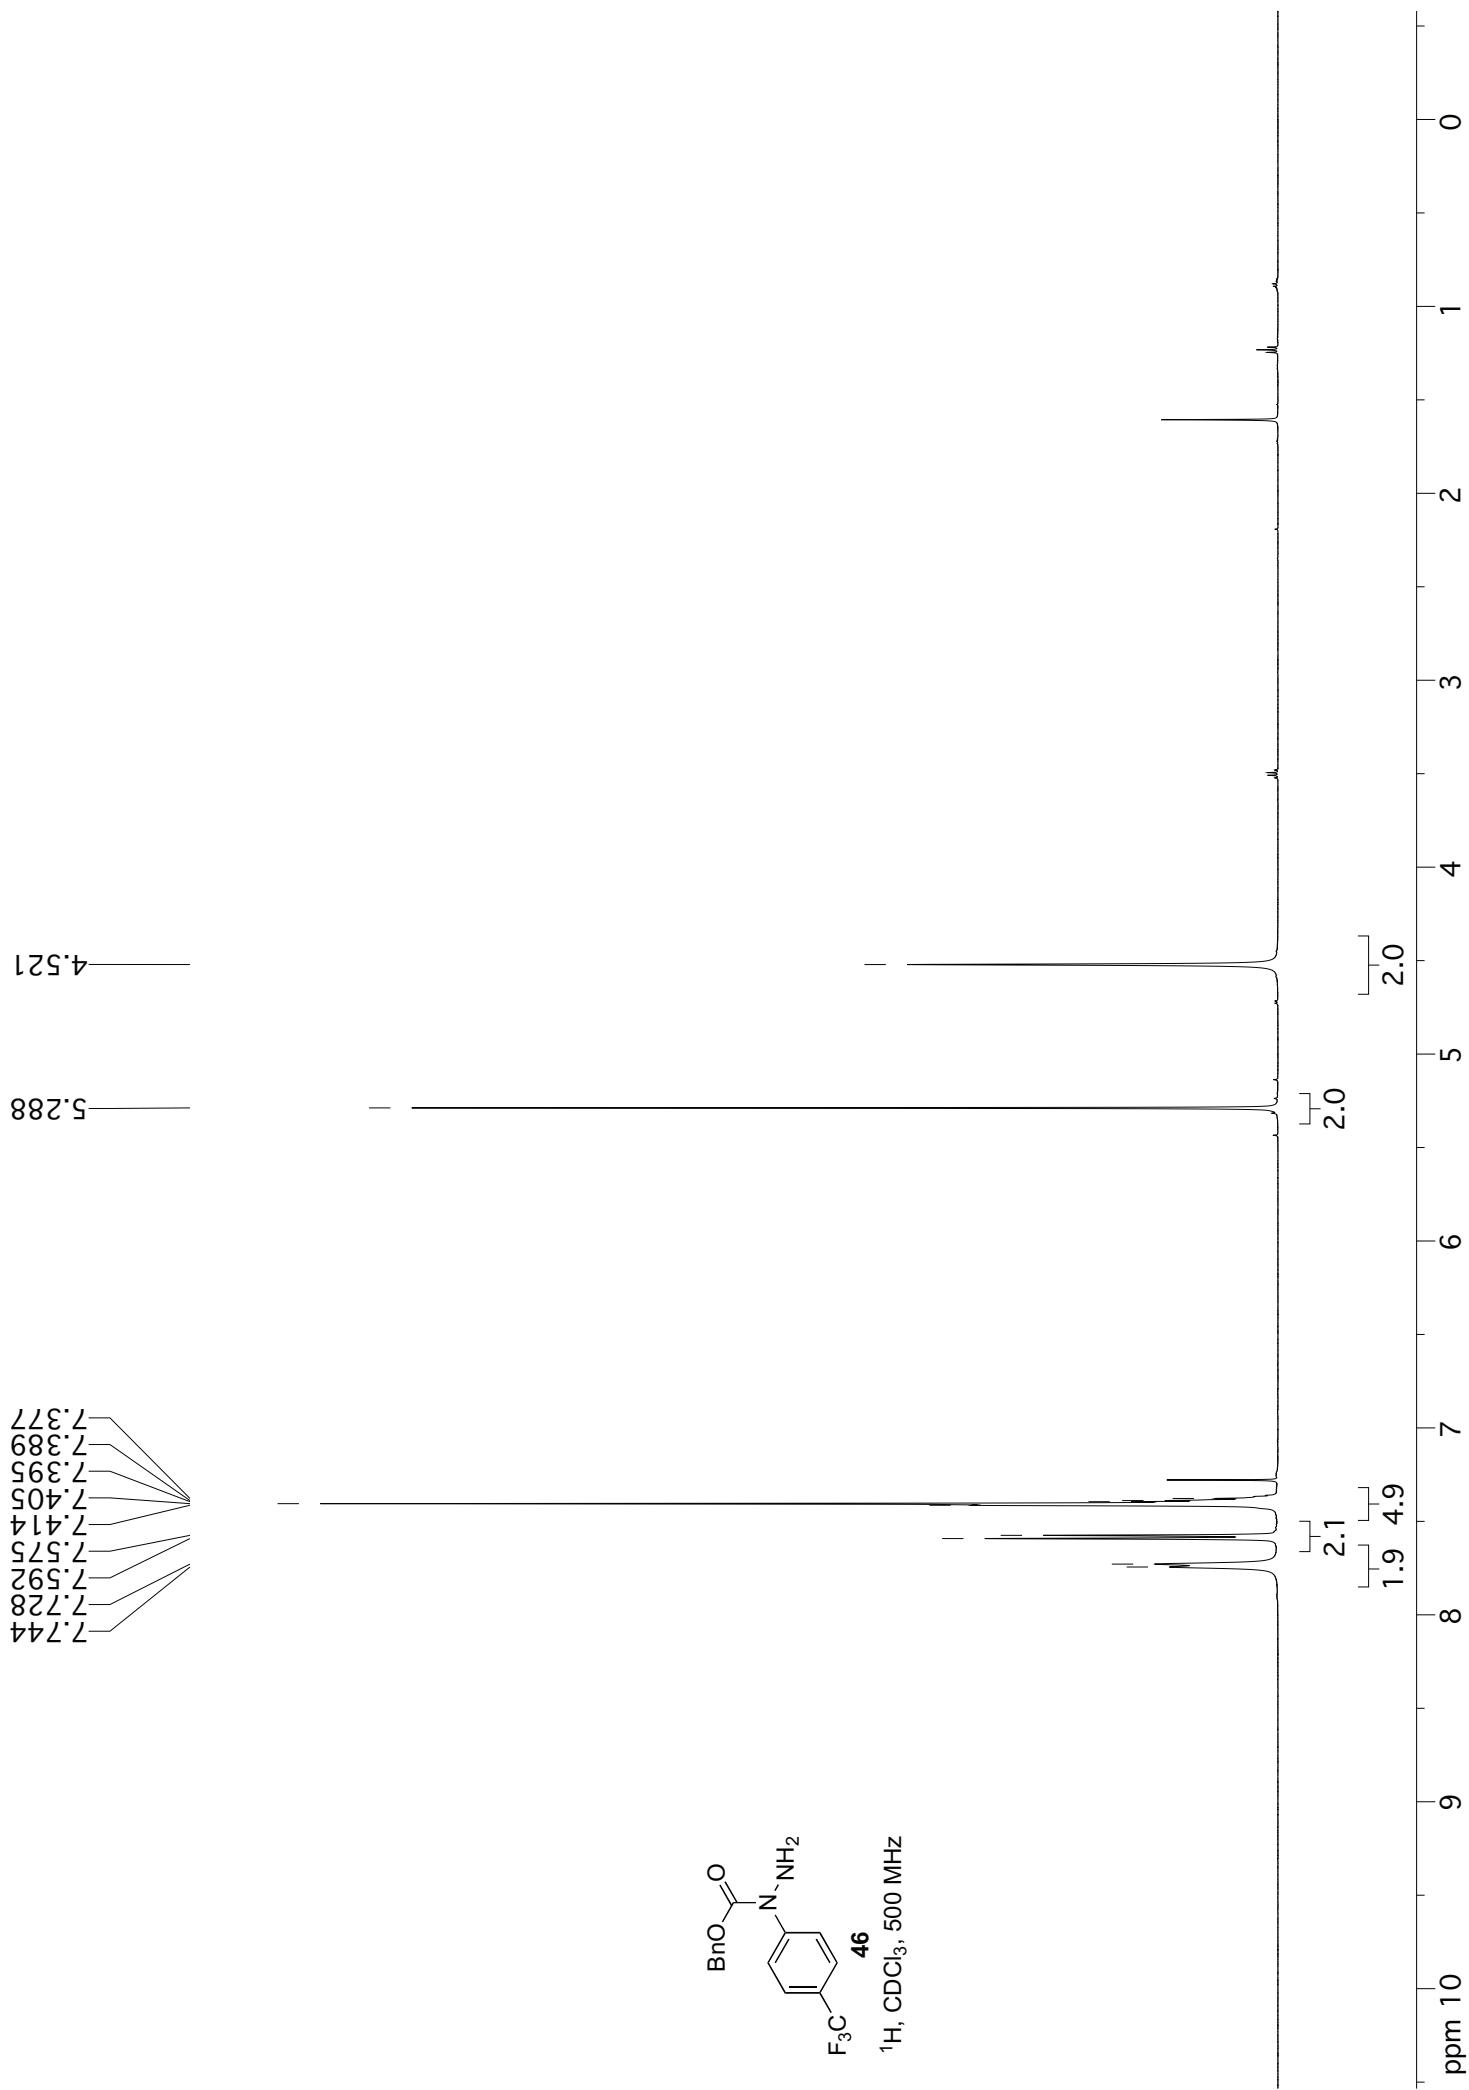

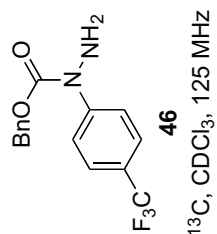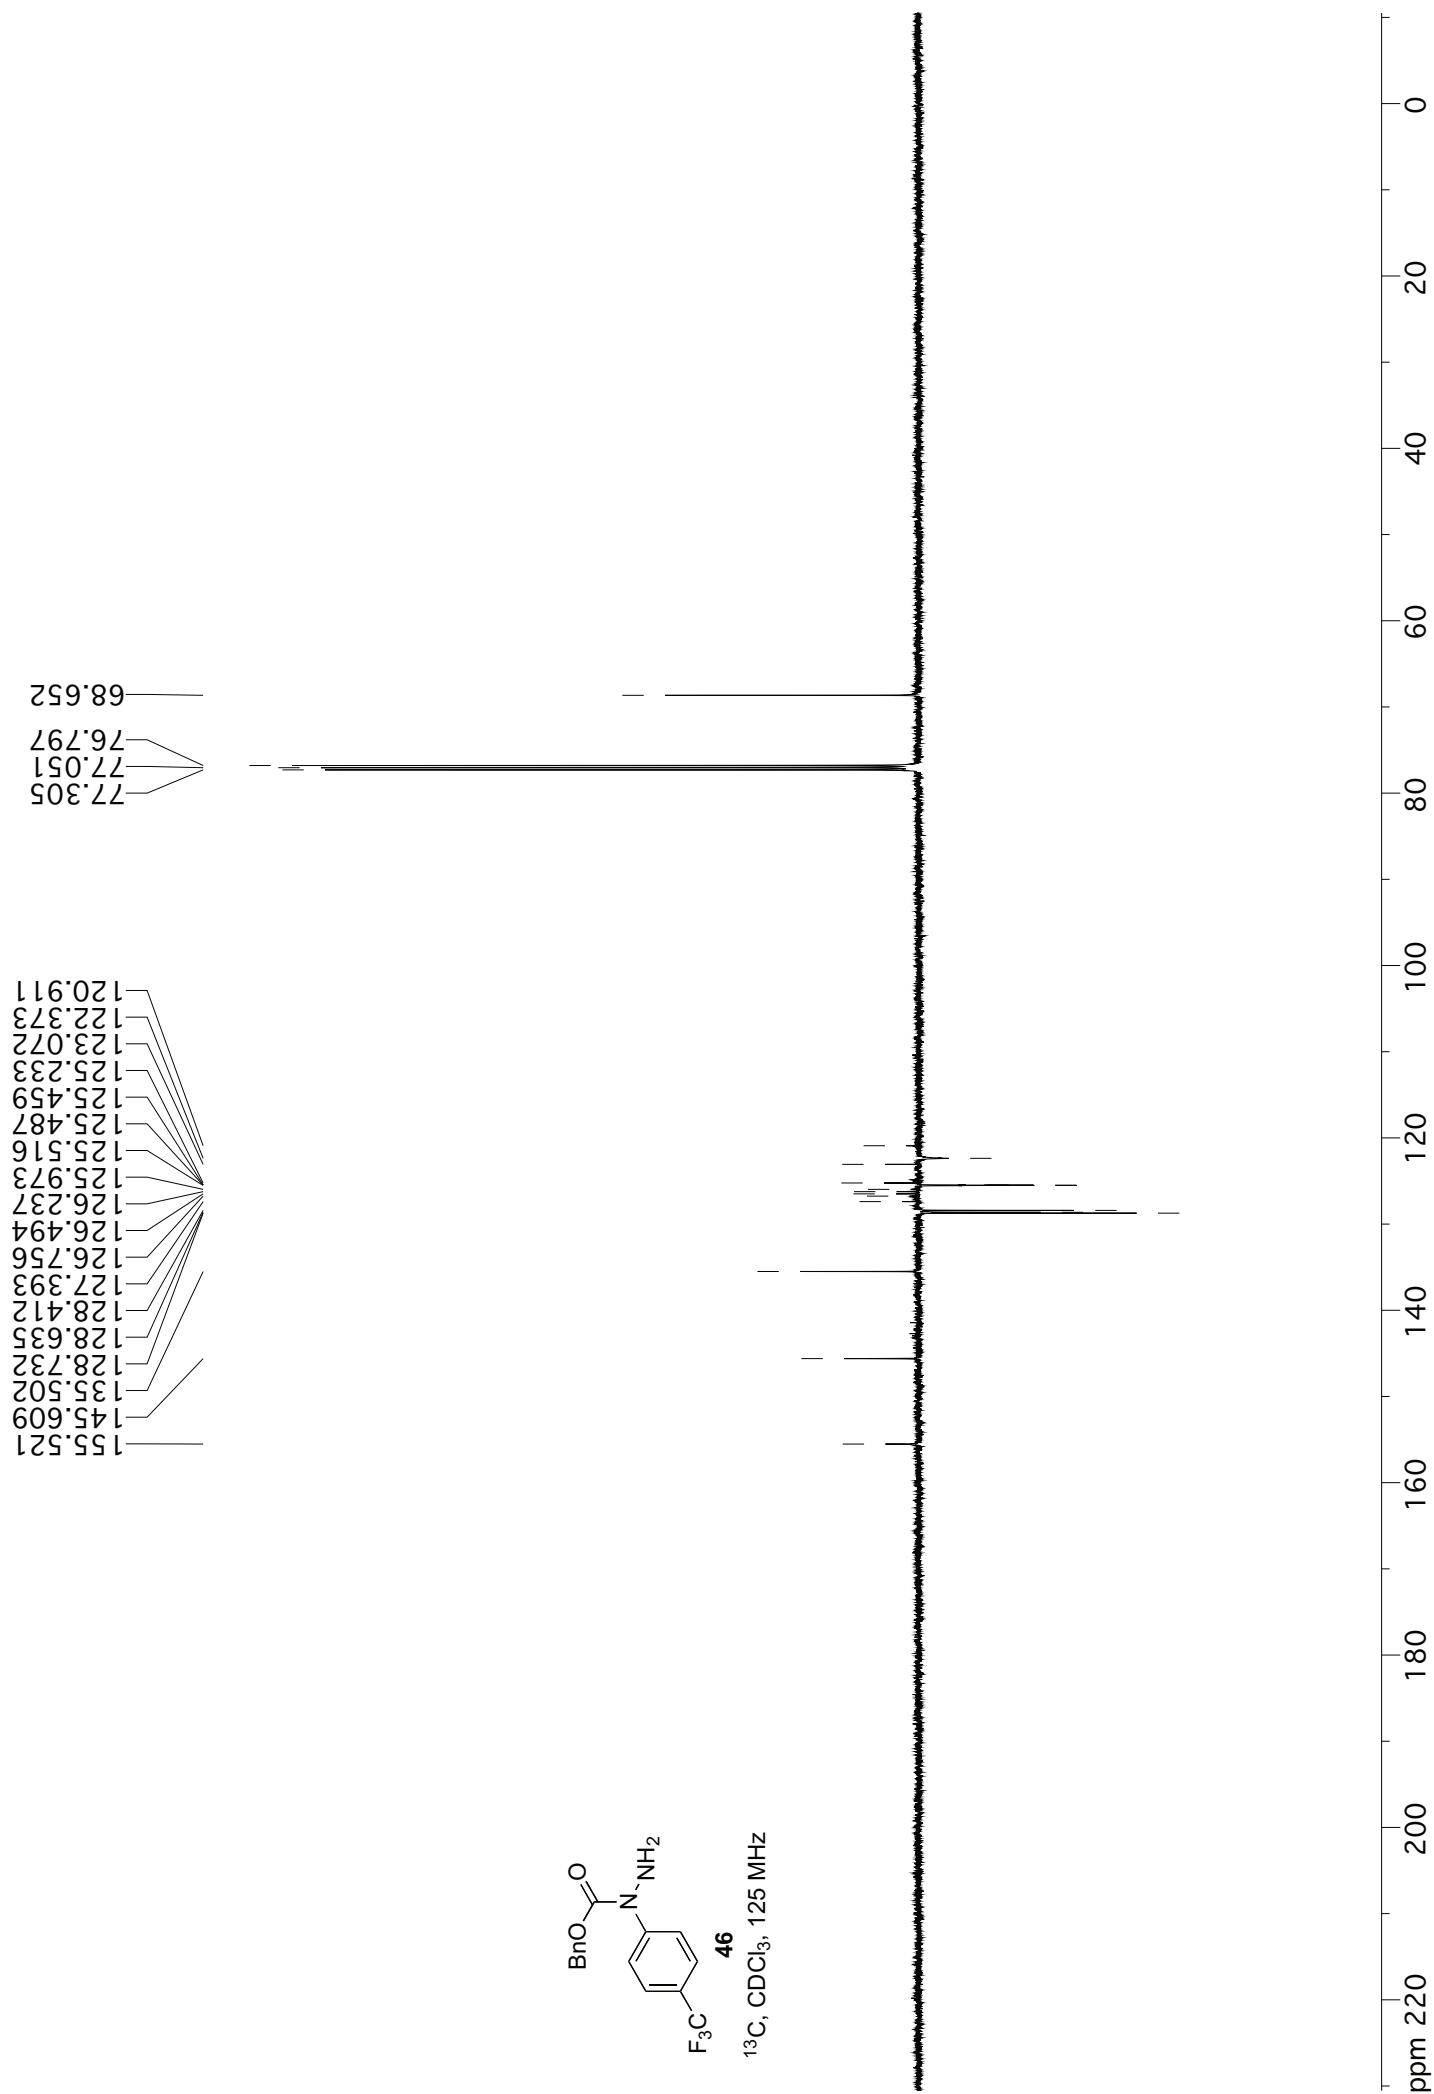

7.736  
7.732  
7.710  
7.647  
7.639  
7.634  
7.615  
7.607  
7.602  
7.550  
7.531  
7.523  
7.504  
7.497  
7.478  
7.354  
7.351  
7.345  
7.342  
7.325  
7.323  
7.317  
7.297  
7.295  
7.289  
7.286  
7.217  
7.210  
7.192  
7.188  
7.164  
6.884  
6.881  
6.855  
6.852  
6.841  
6.838  
6.813  
6.789  
4.875

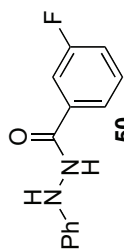

<sup>1</sup>H, CD<sub>3</sub>OD, 300 MHz

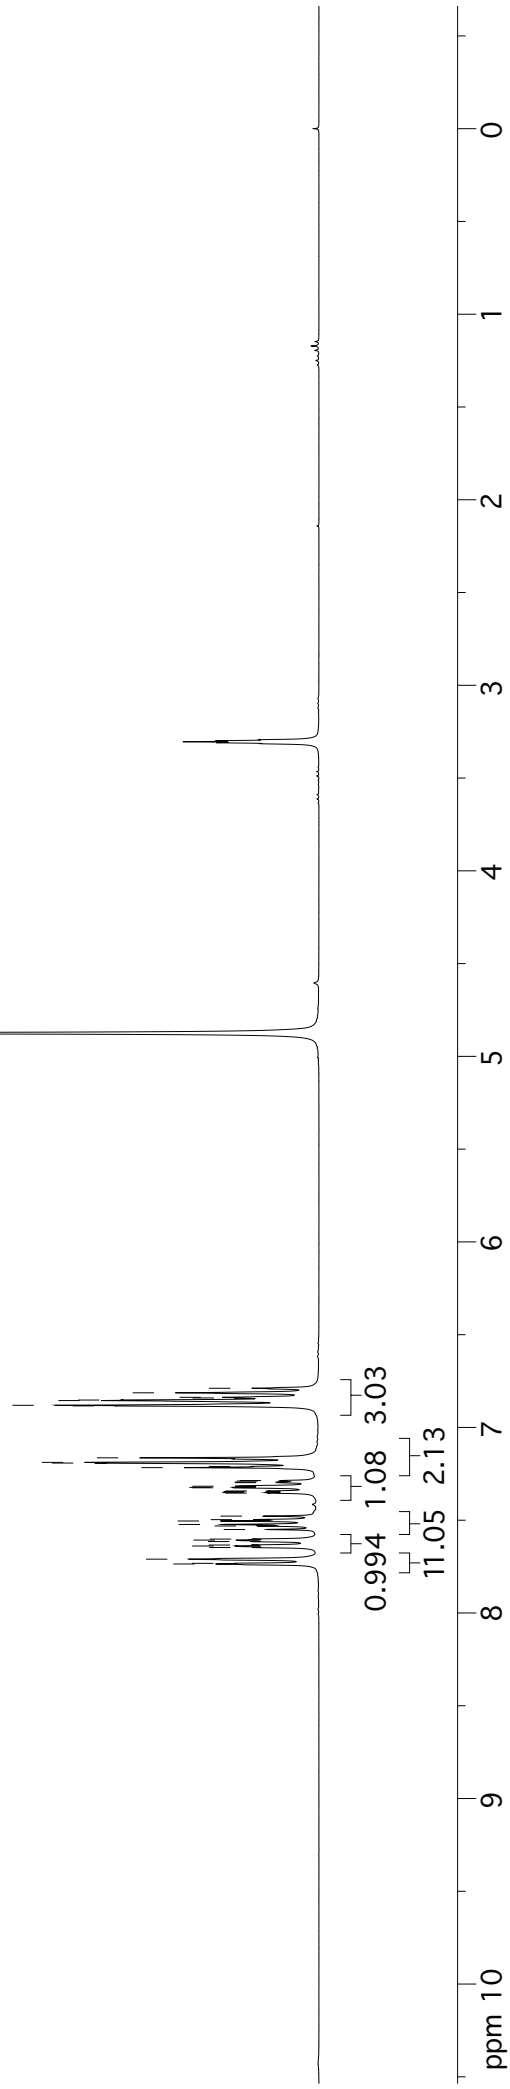

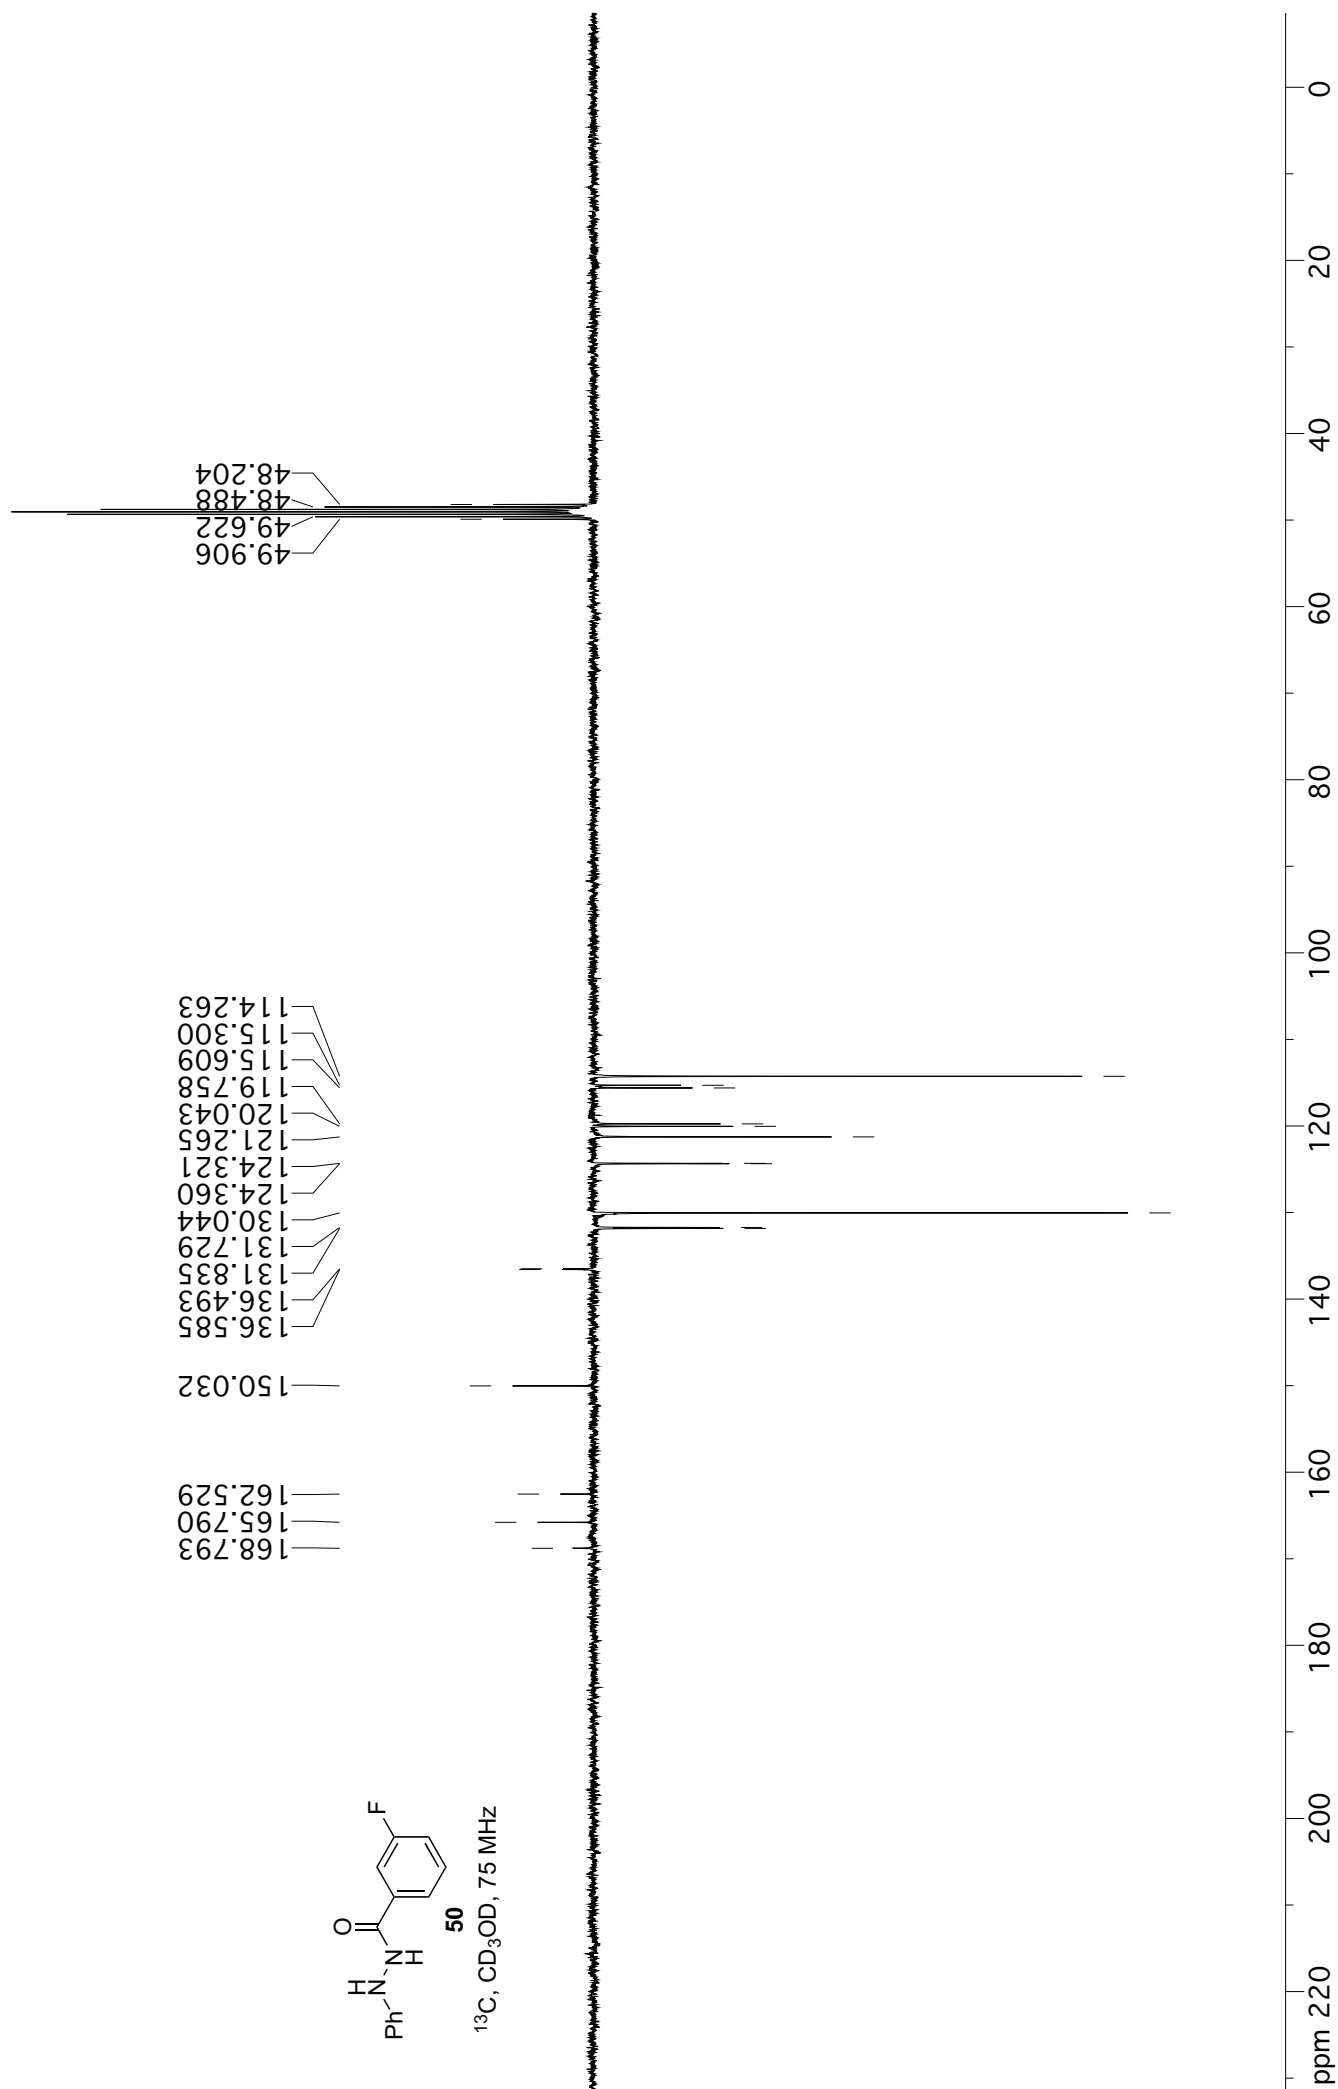

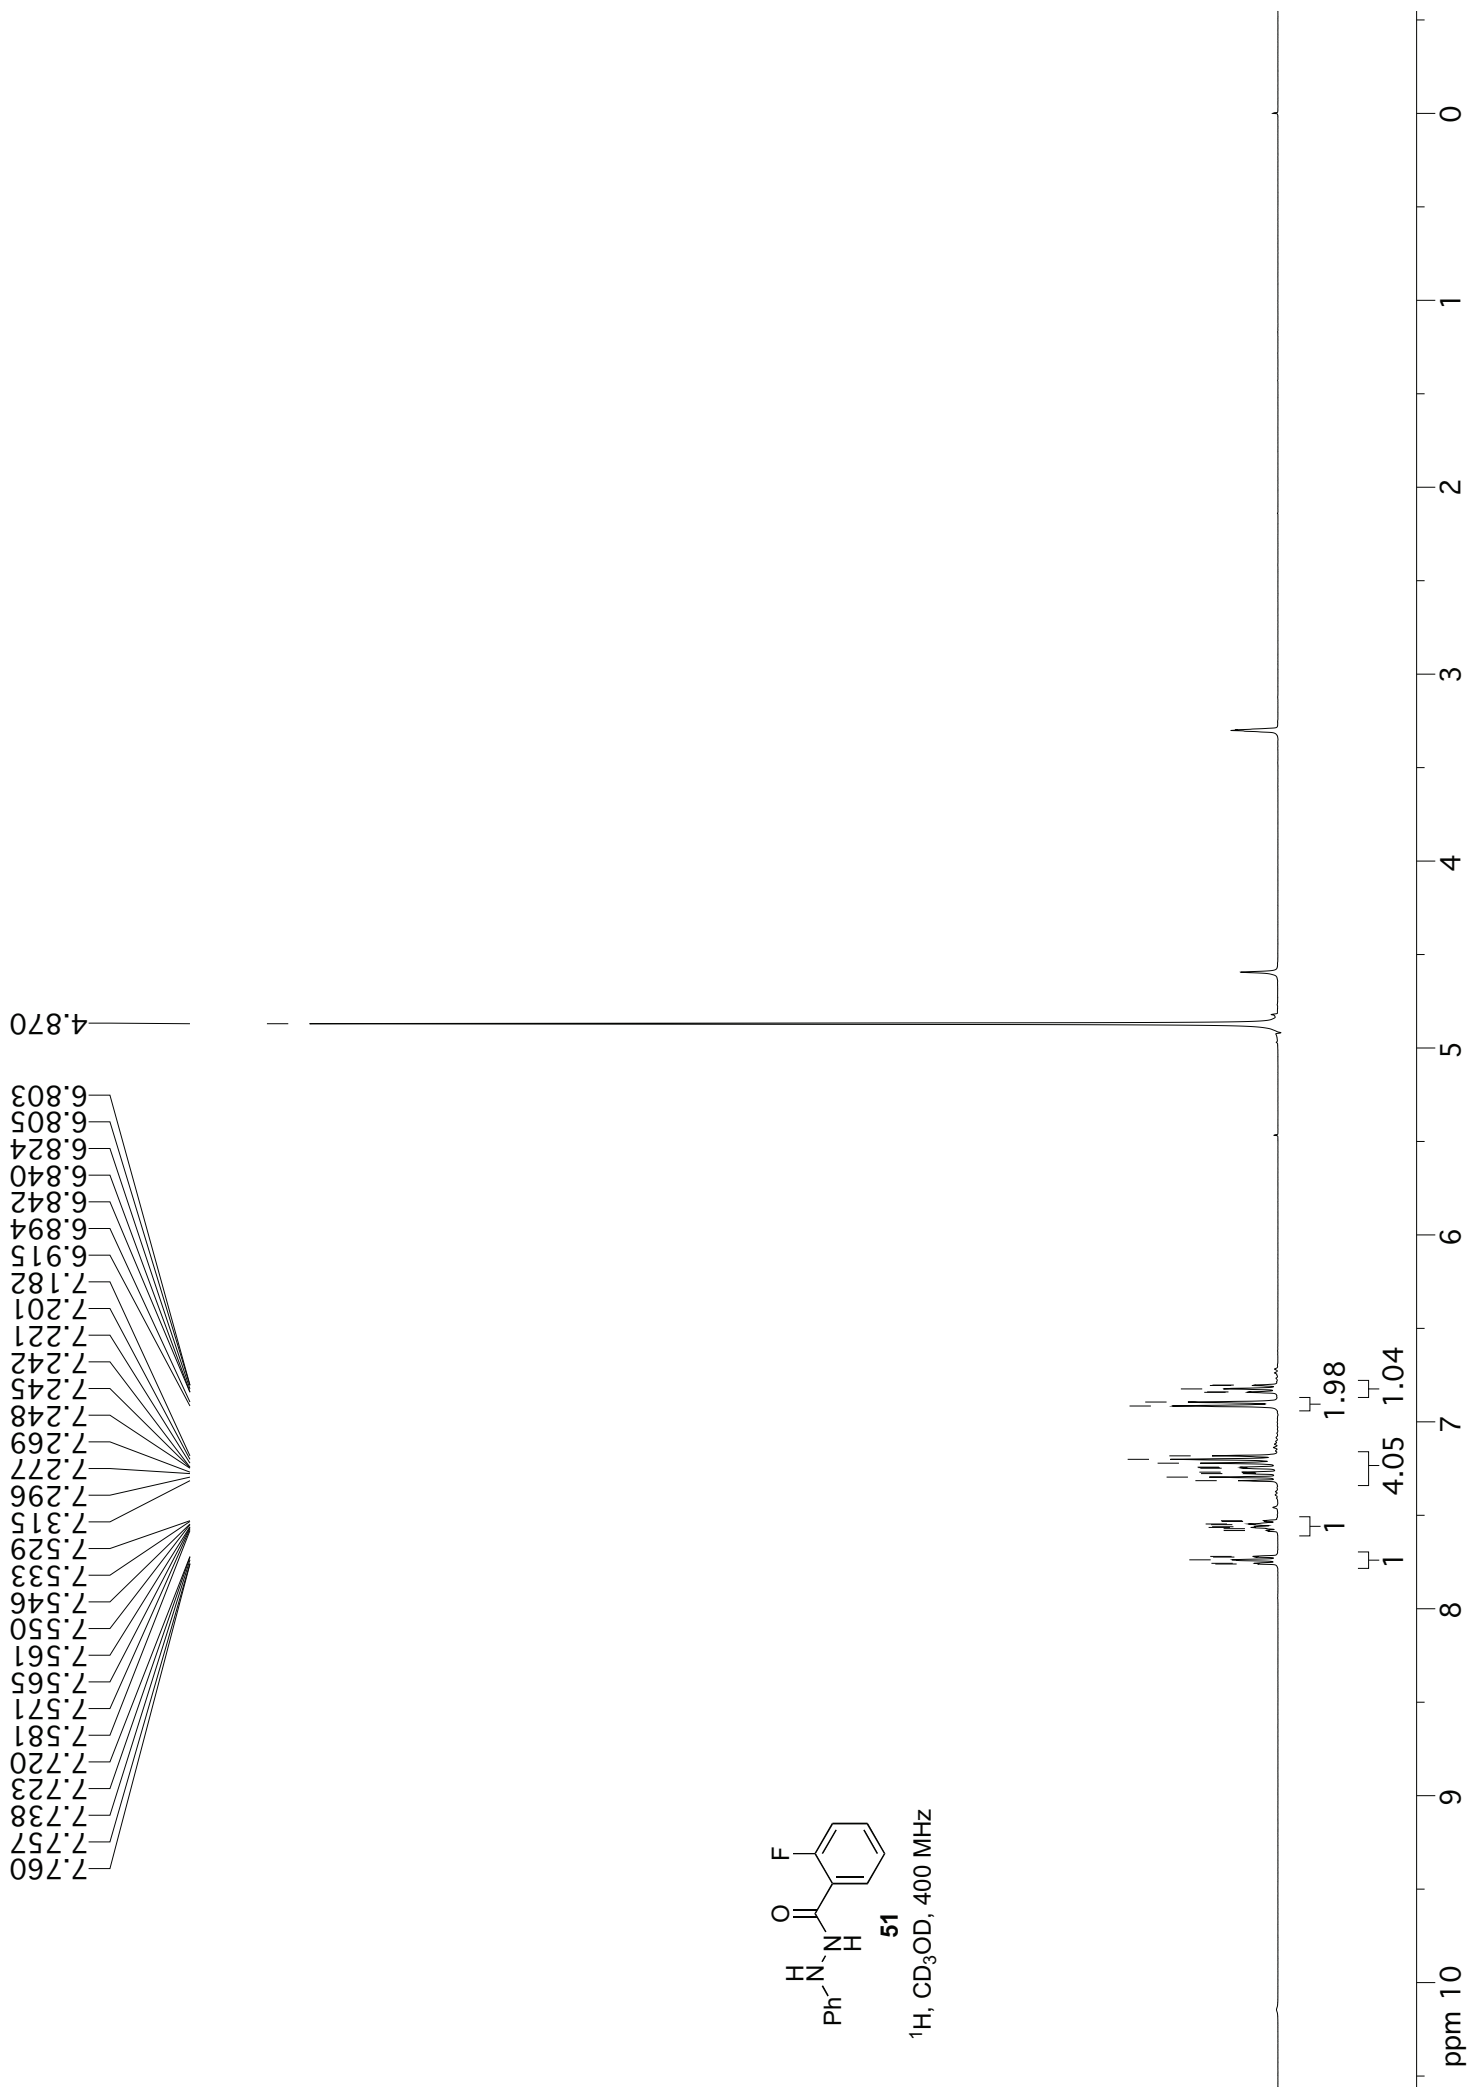

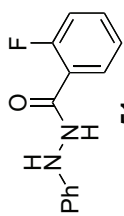

$^{13}\text{C}$ ,  $\text{CD}_3\text{OD}$ , 75 MHz

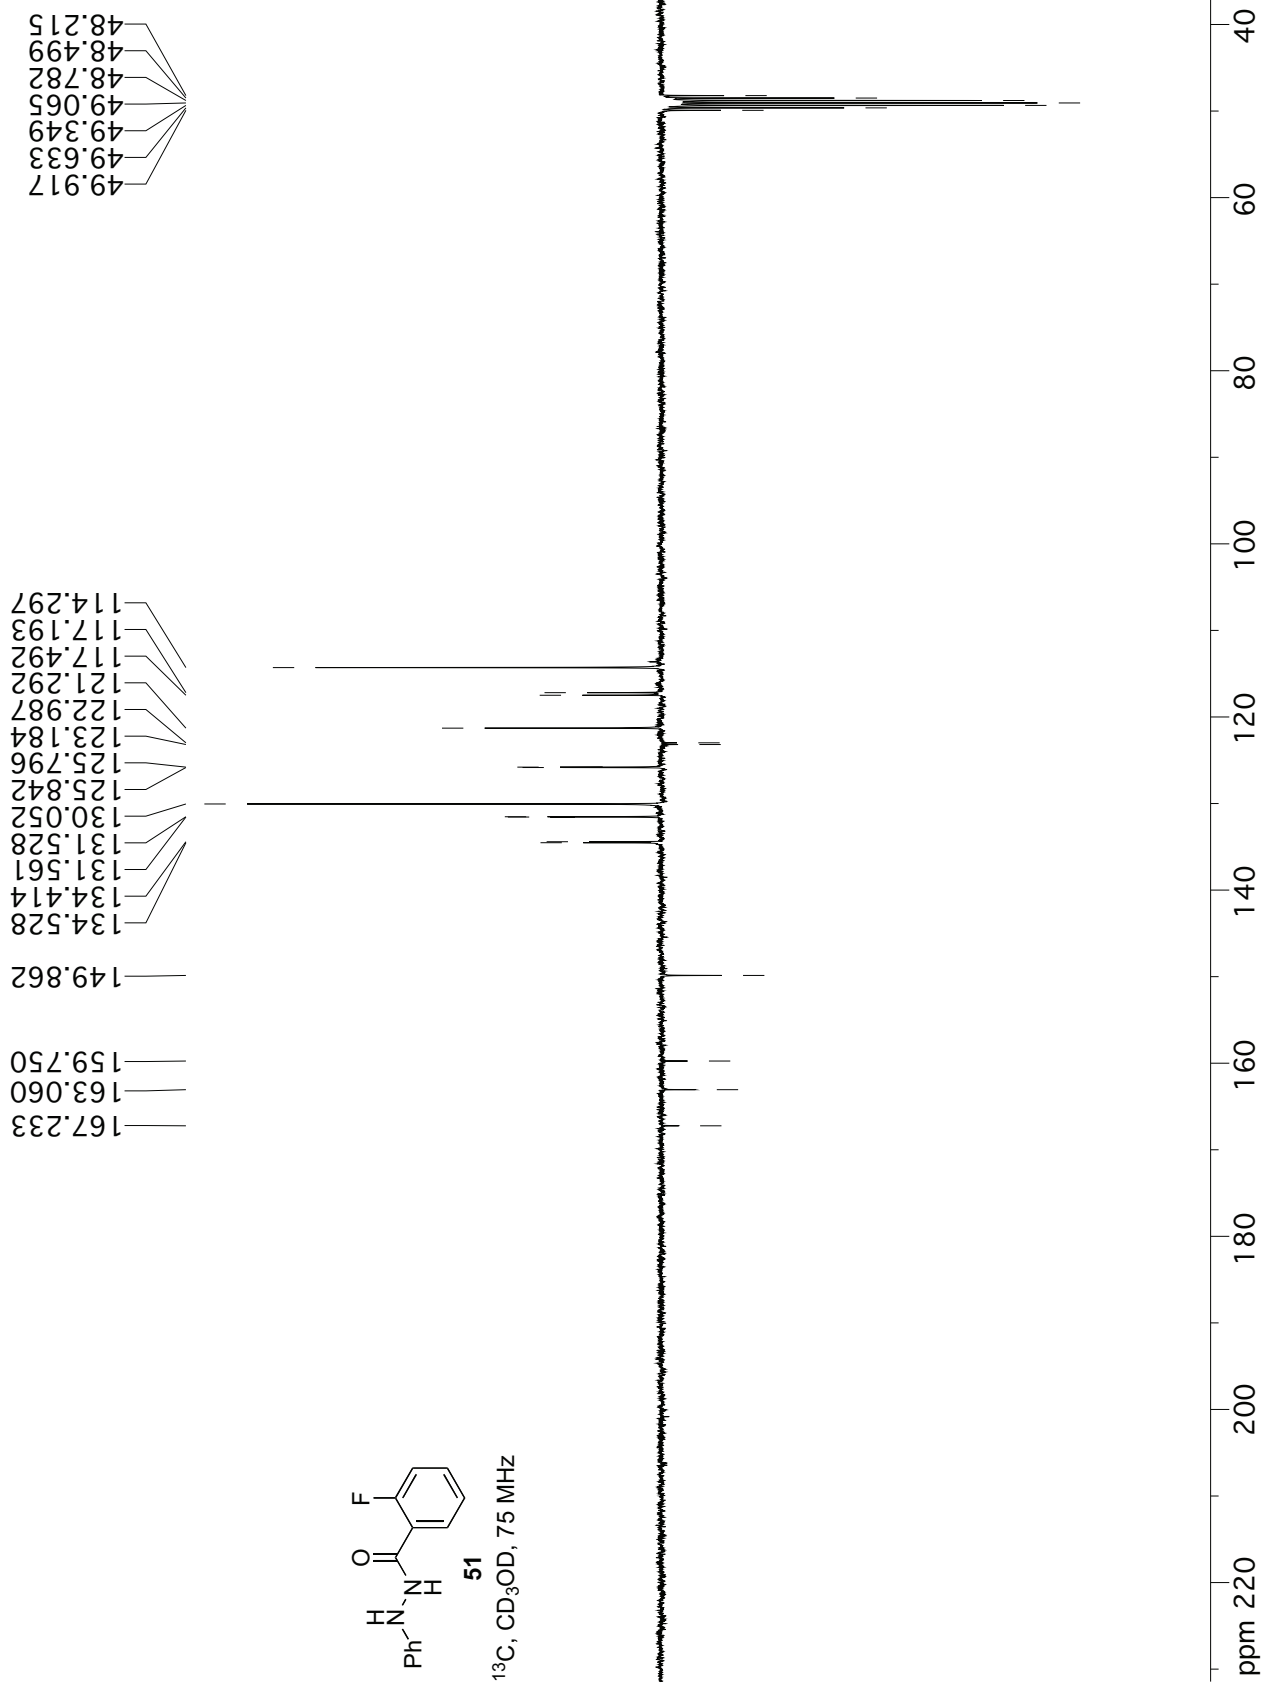



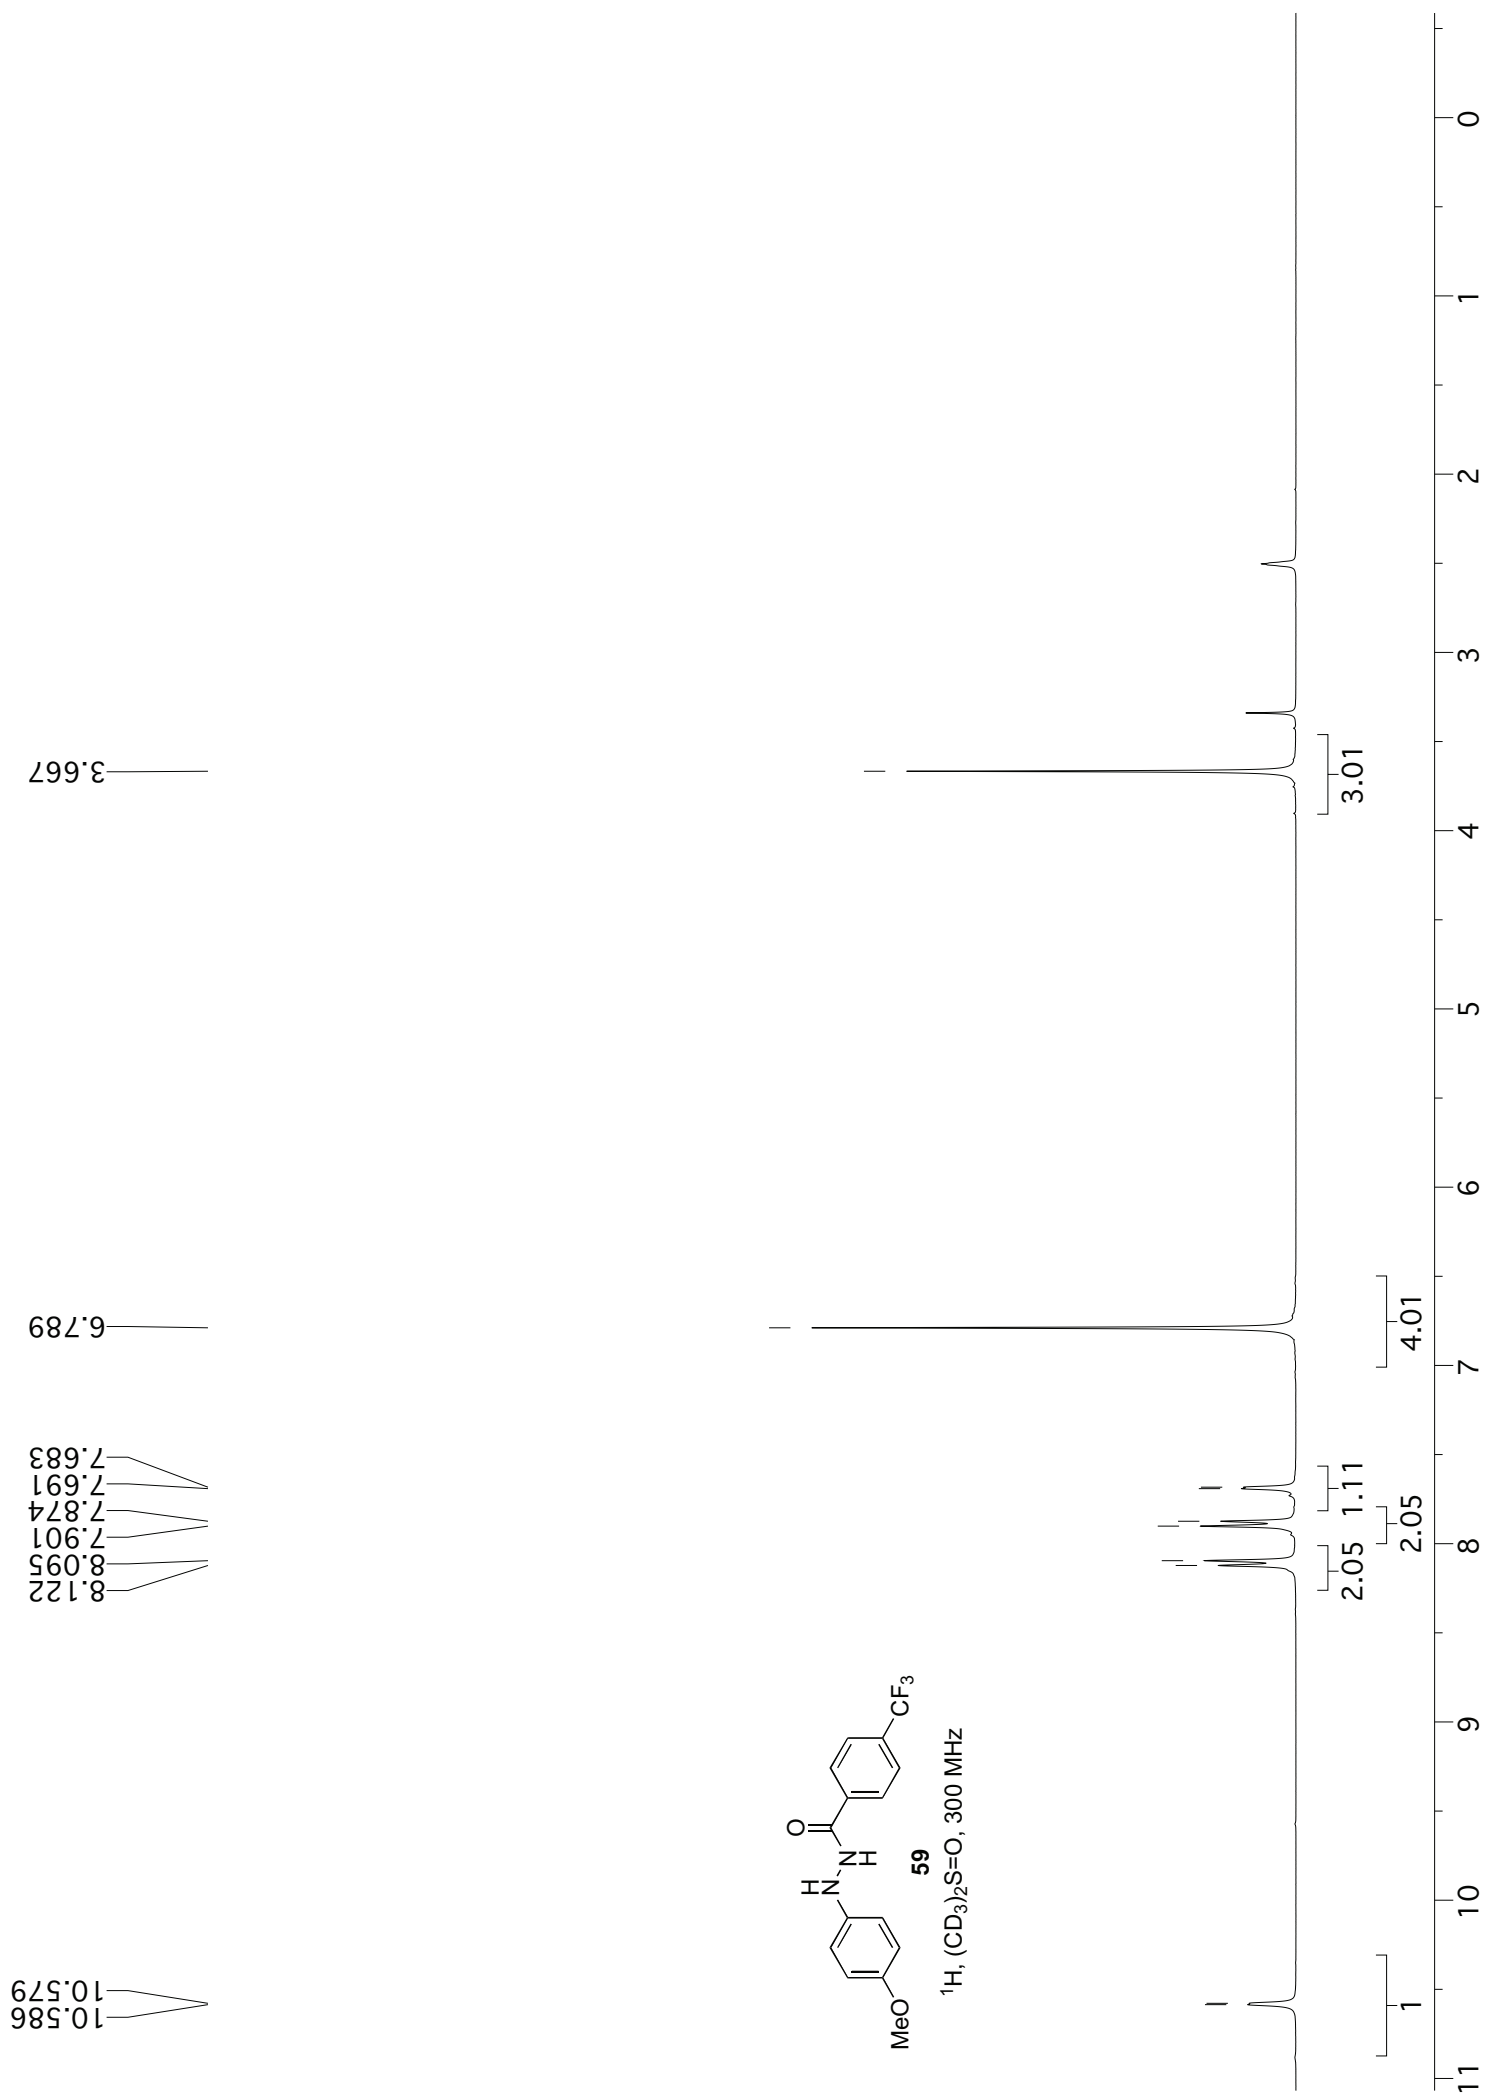

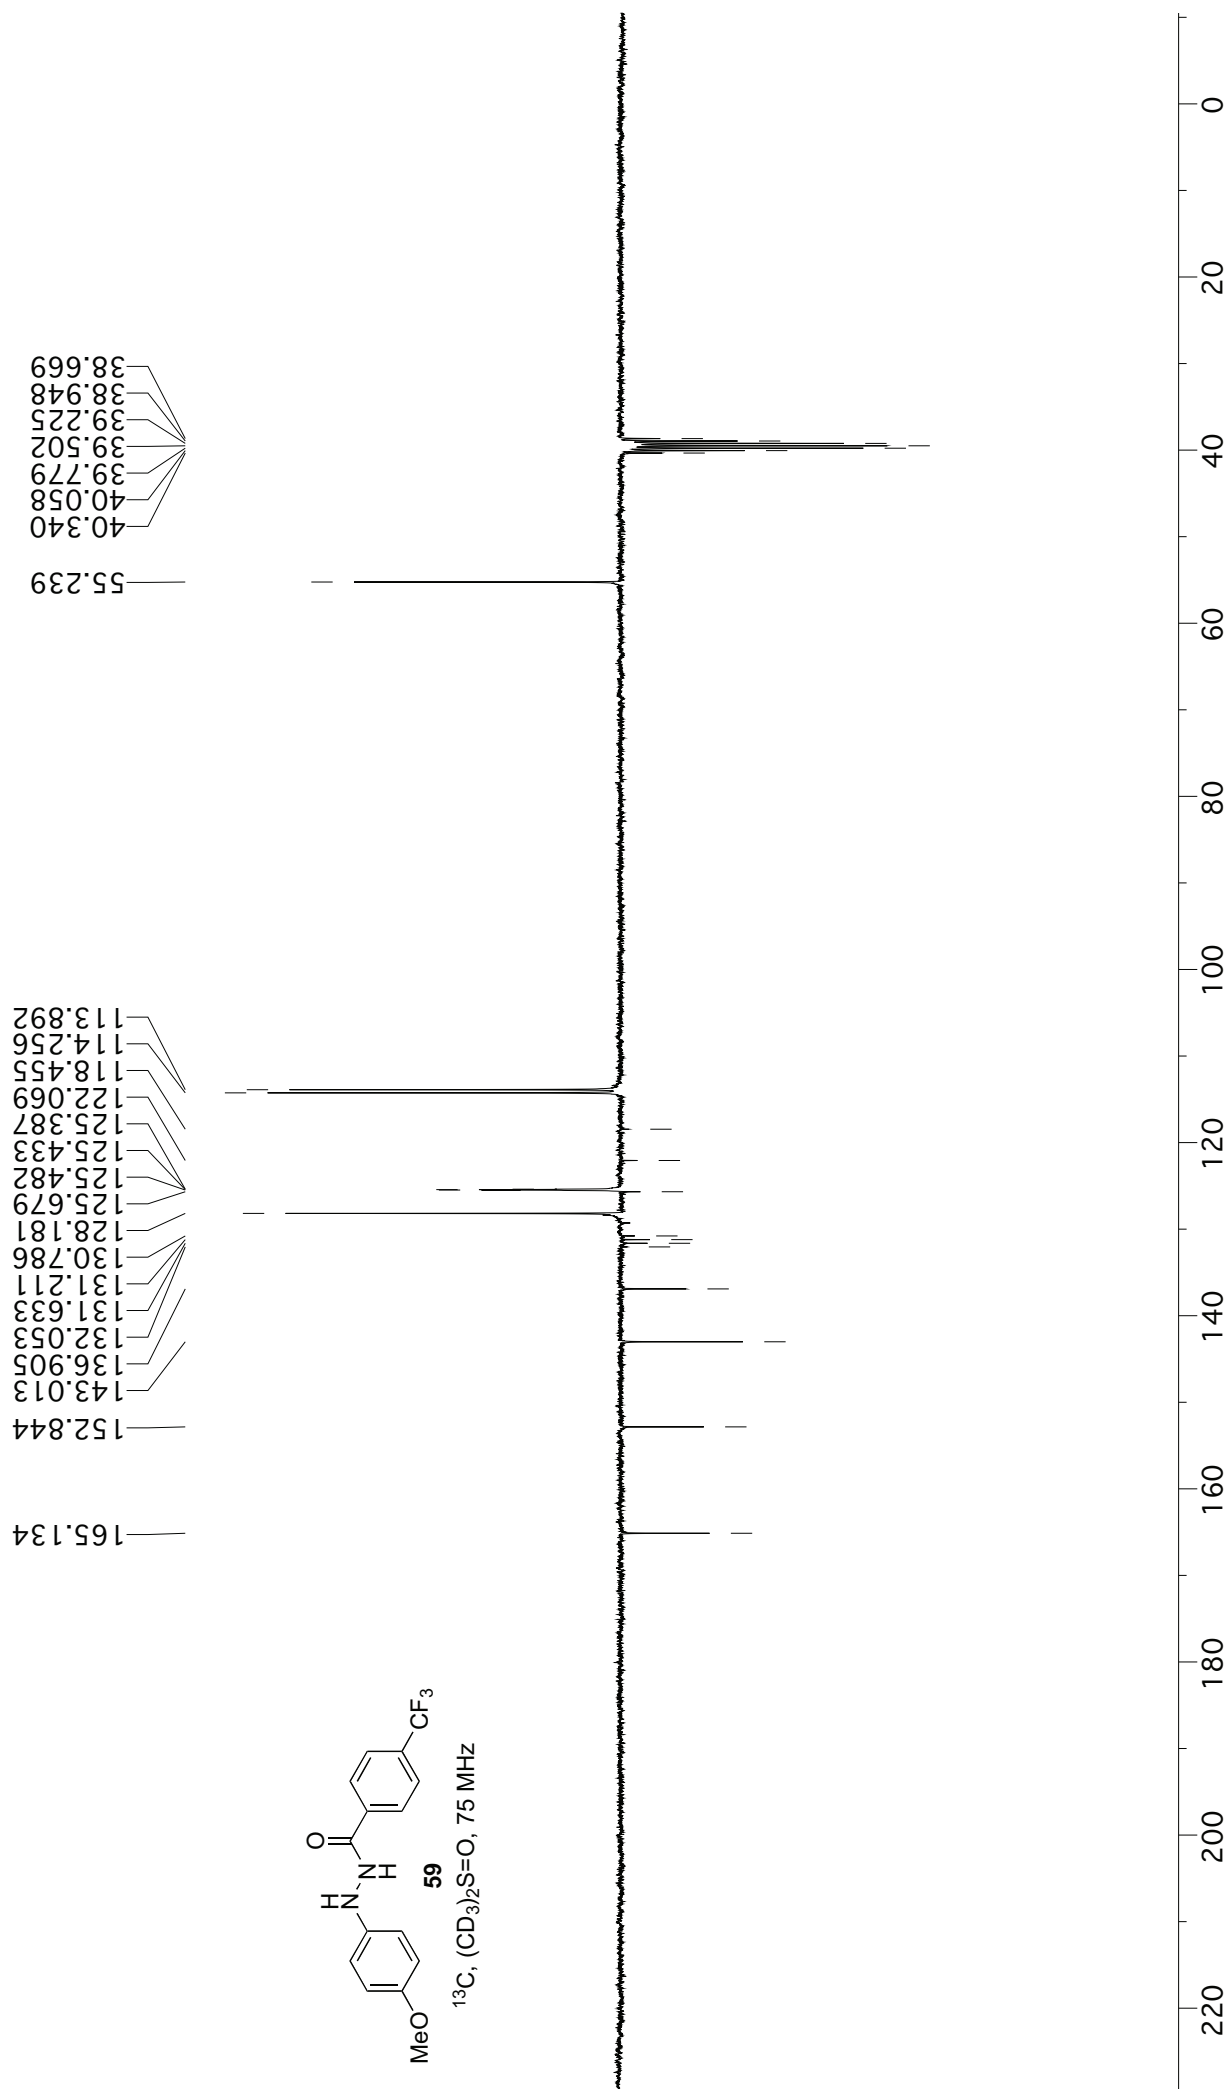

8.123  
8.119  
8.114  
8.103  
8.095  
8.090  
8.086  
8.079  
8.073  
8.063  
8.055  
7.739  
7.734  
7.721  
7.714  
7.708  
7.694  
7.689  
7.685  
7.597  
7.592  
7.575  
7.571  
7.552  
7.547  
7.544  
7.321  
7.313  
7.301  
7.298  
7.293  
7.291  
7.287  
7.271  
7.263

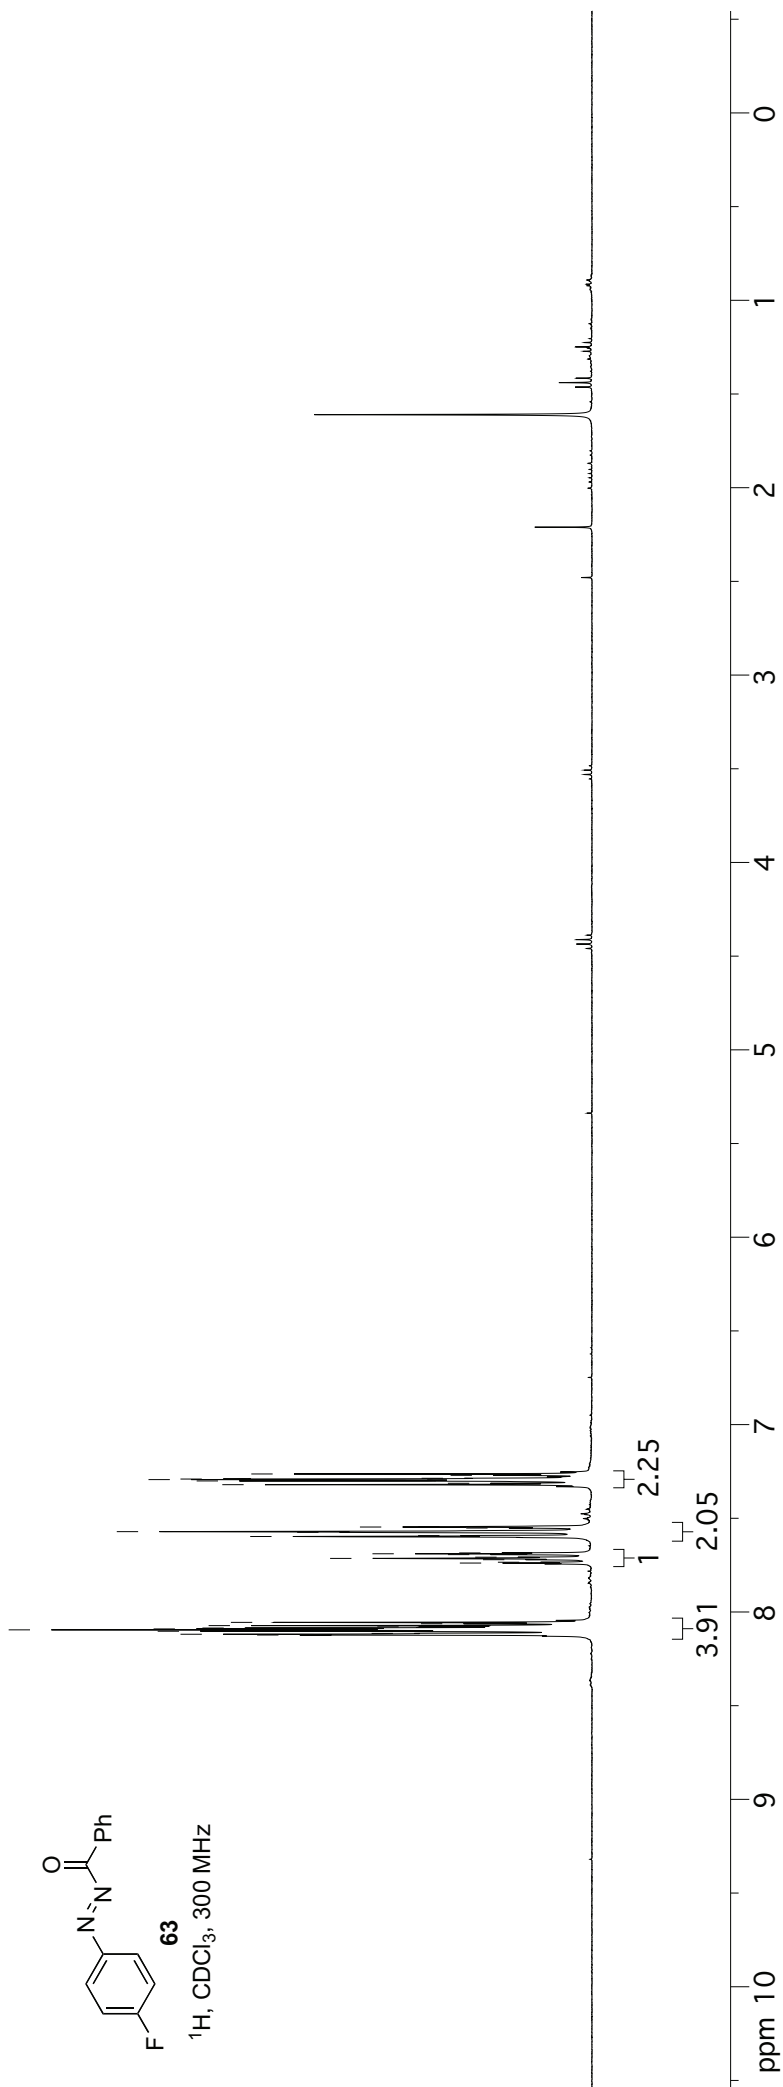

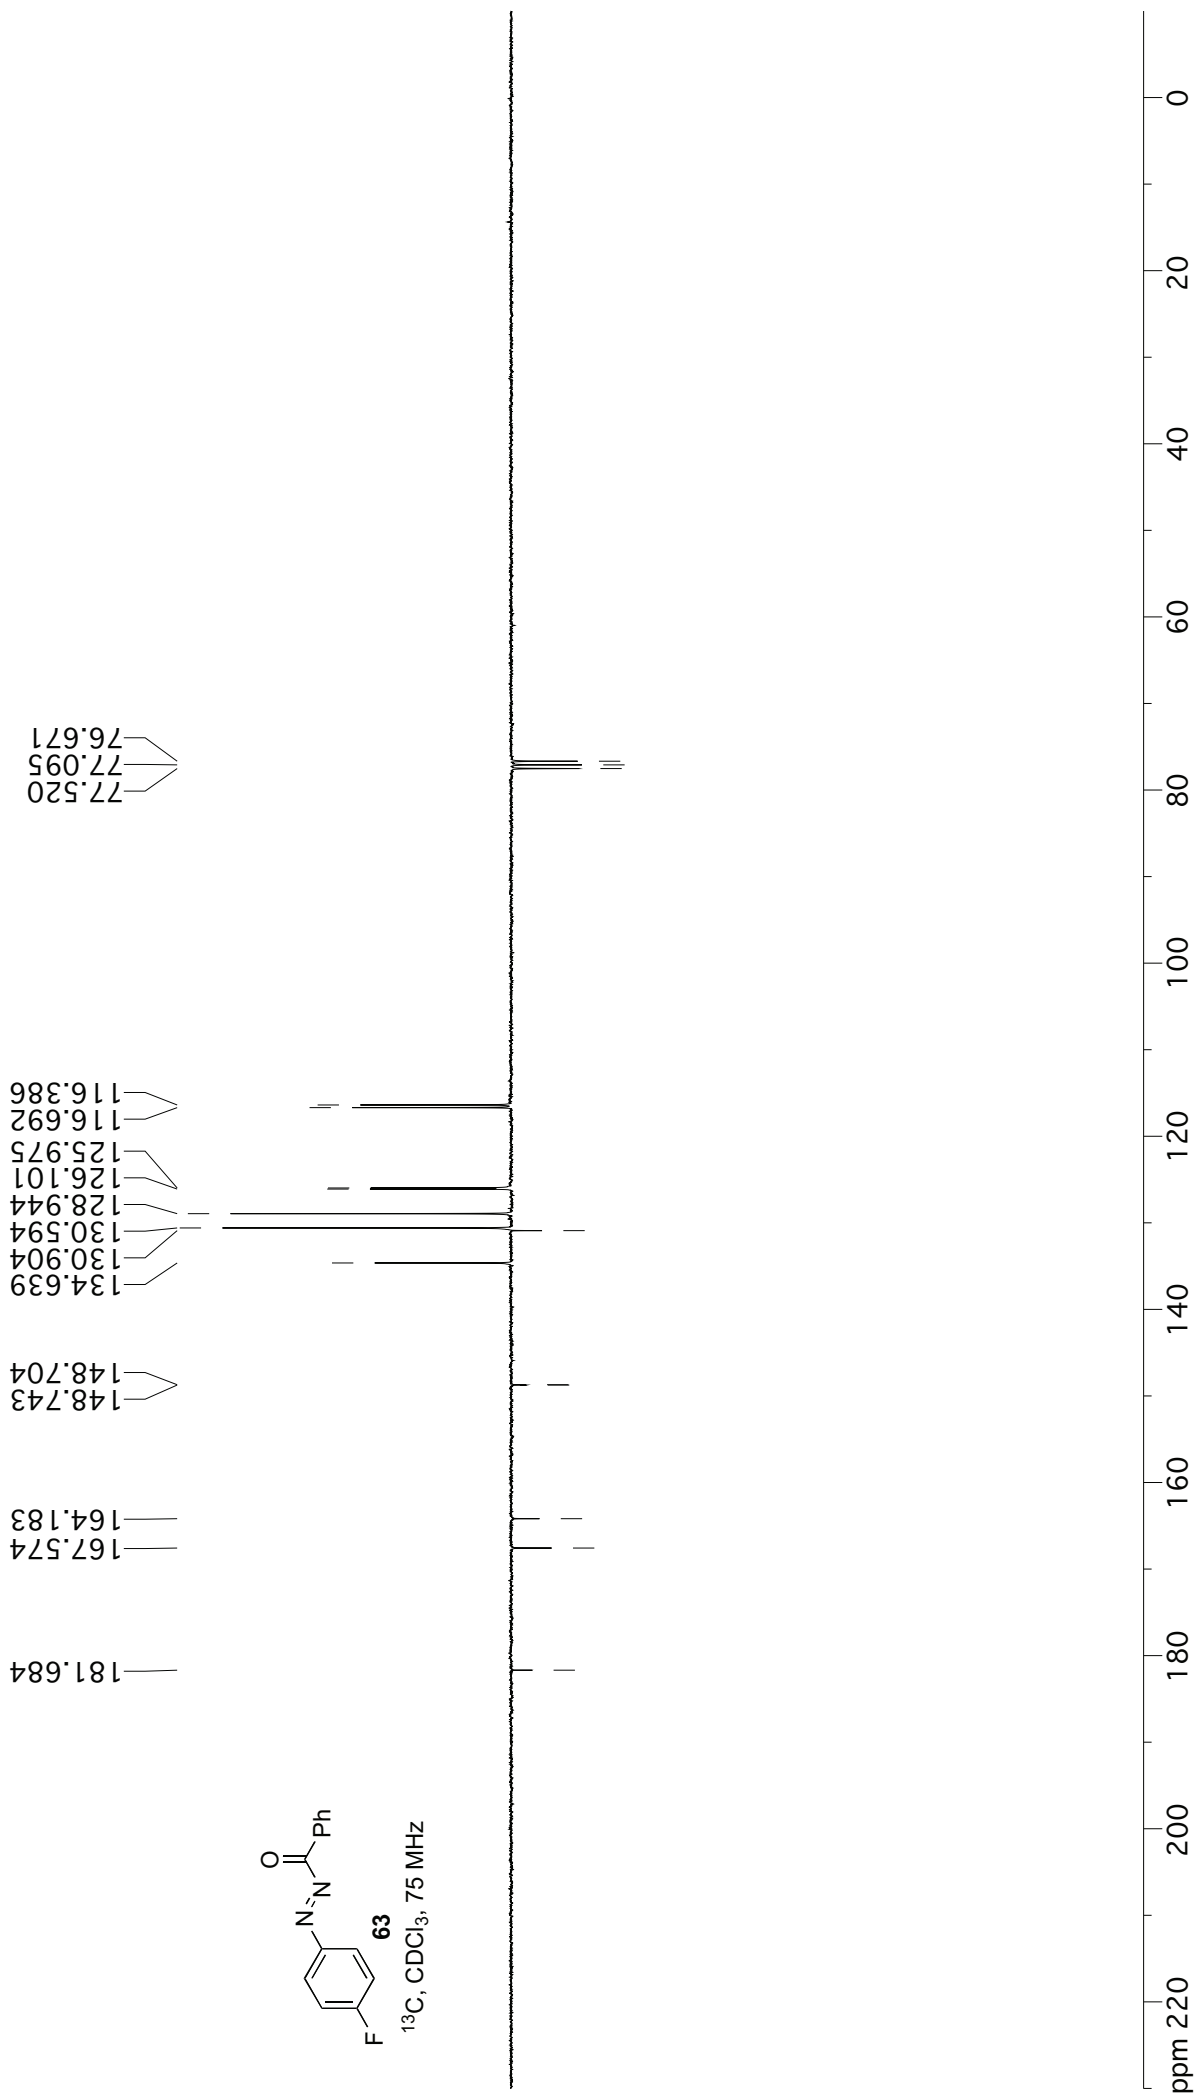

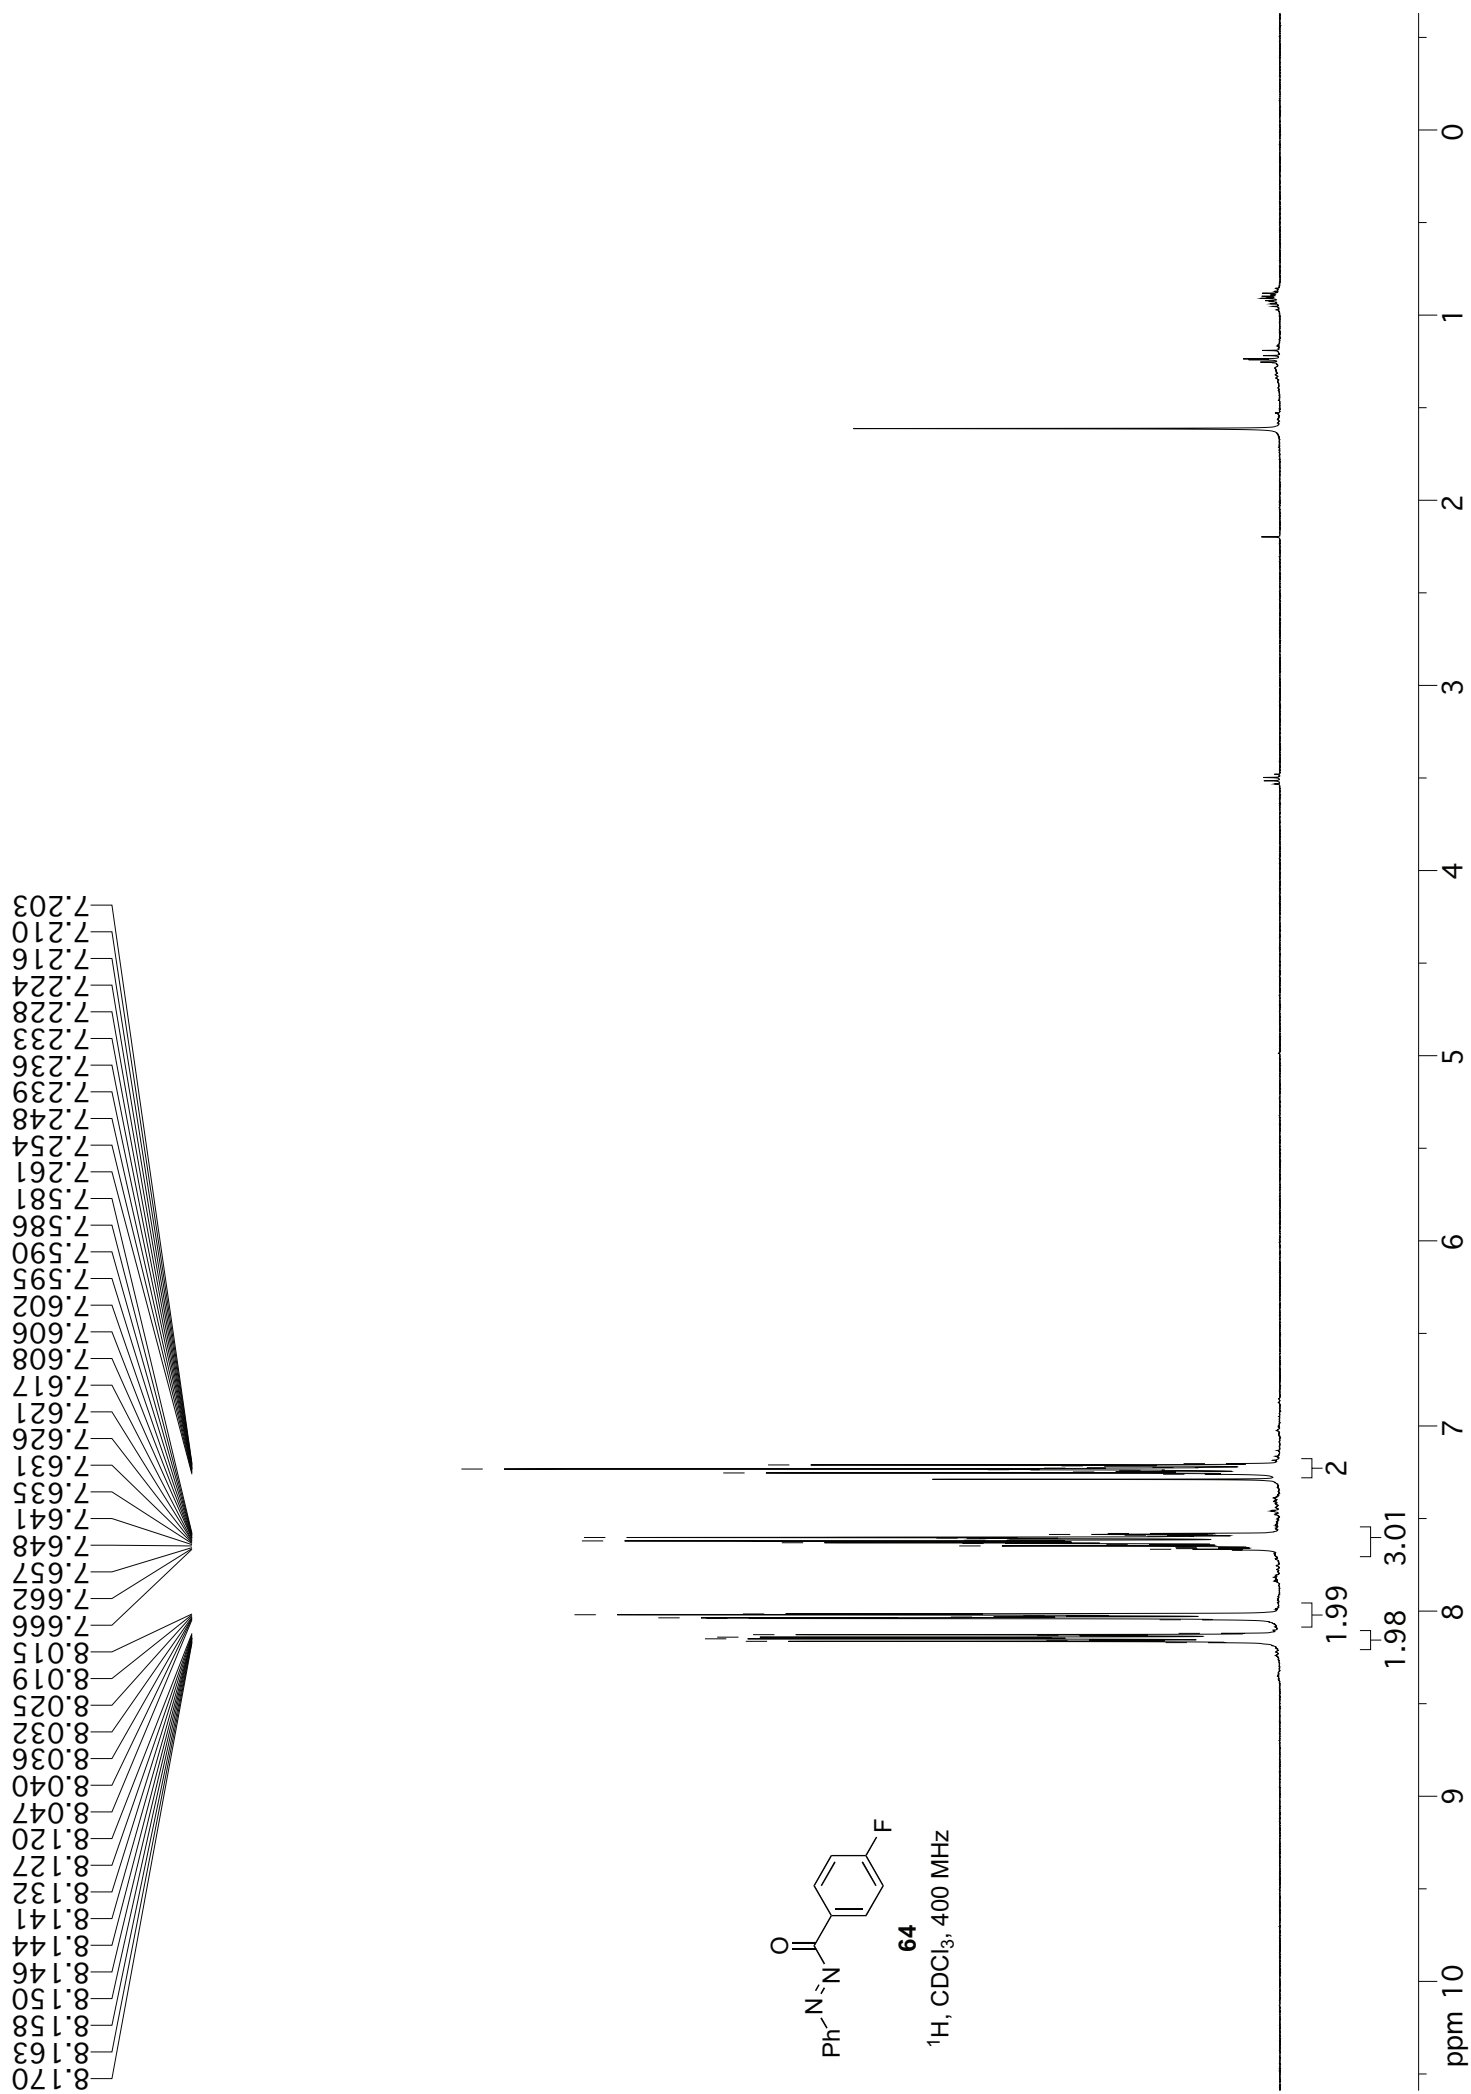

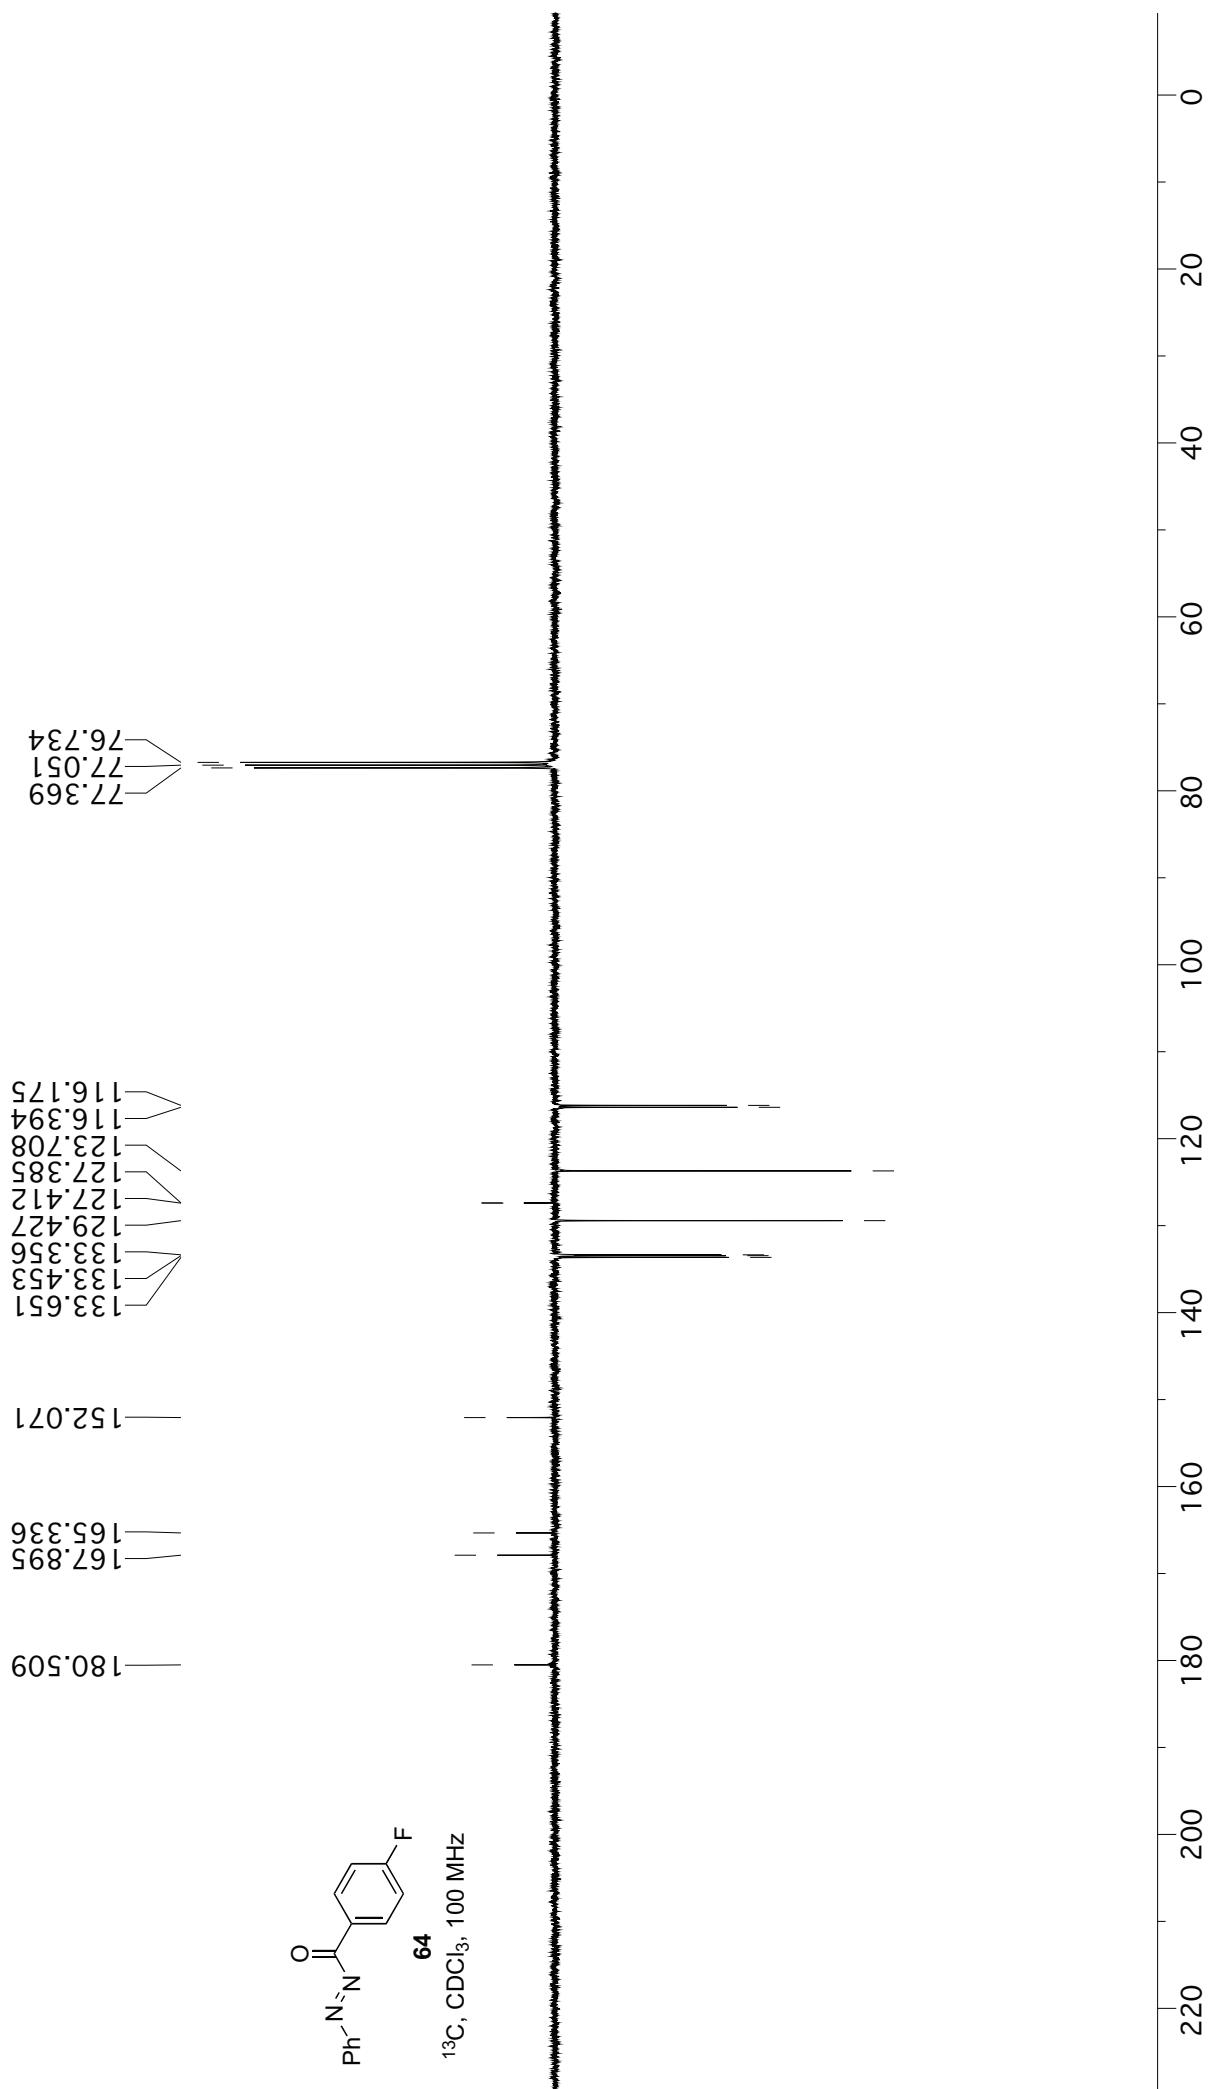

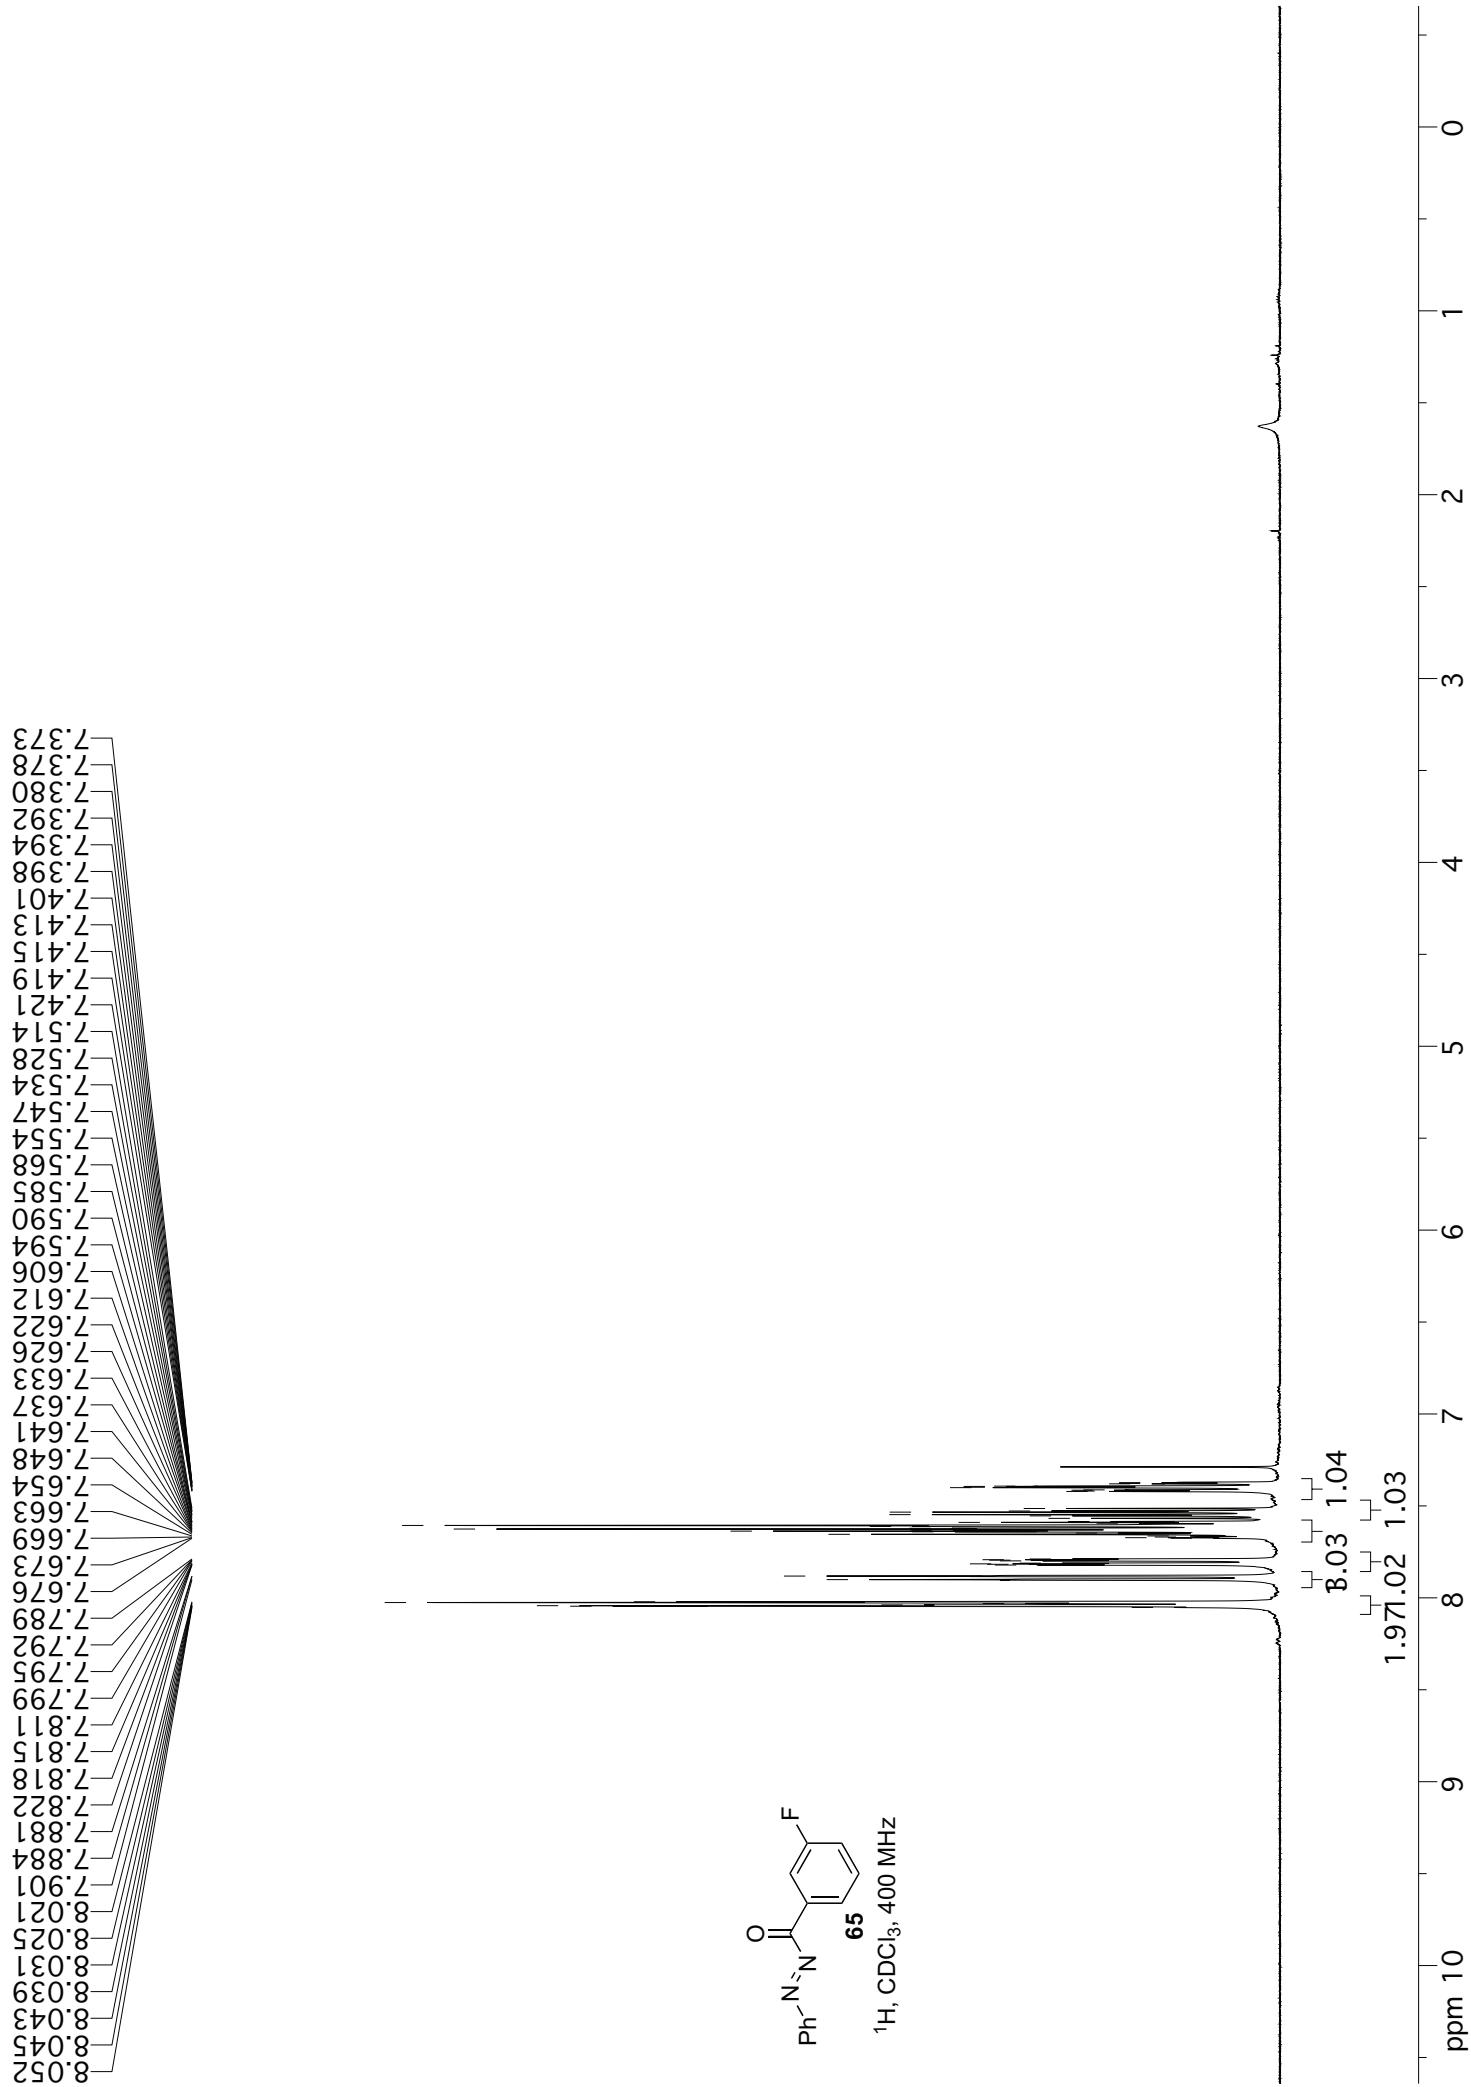

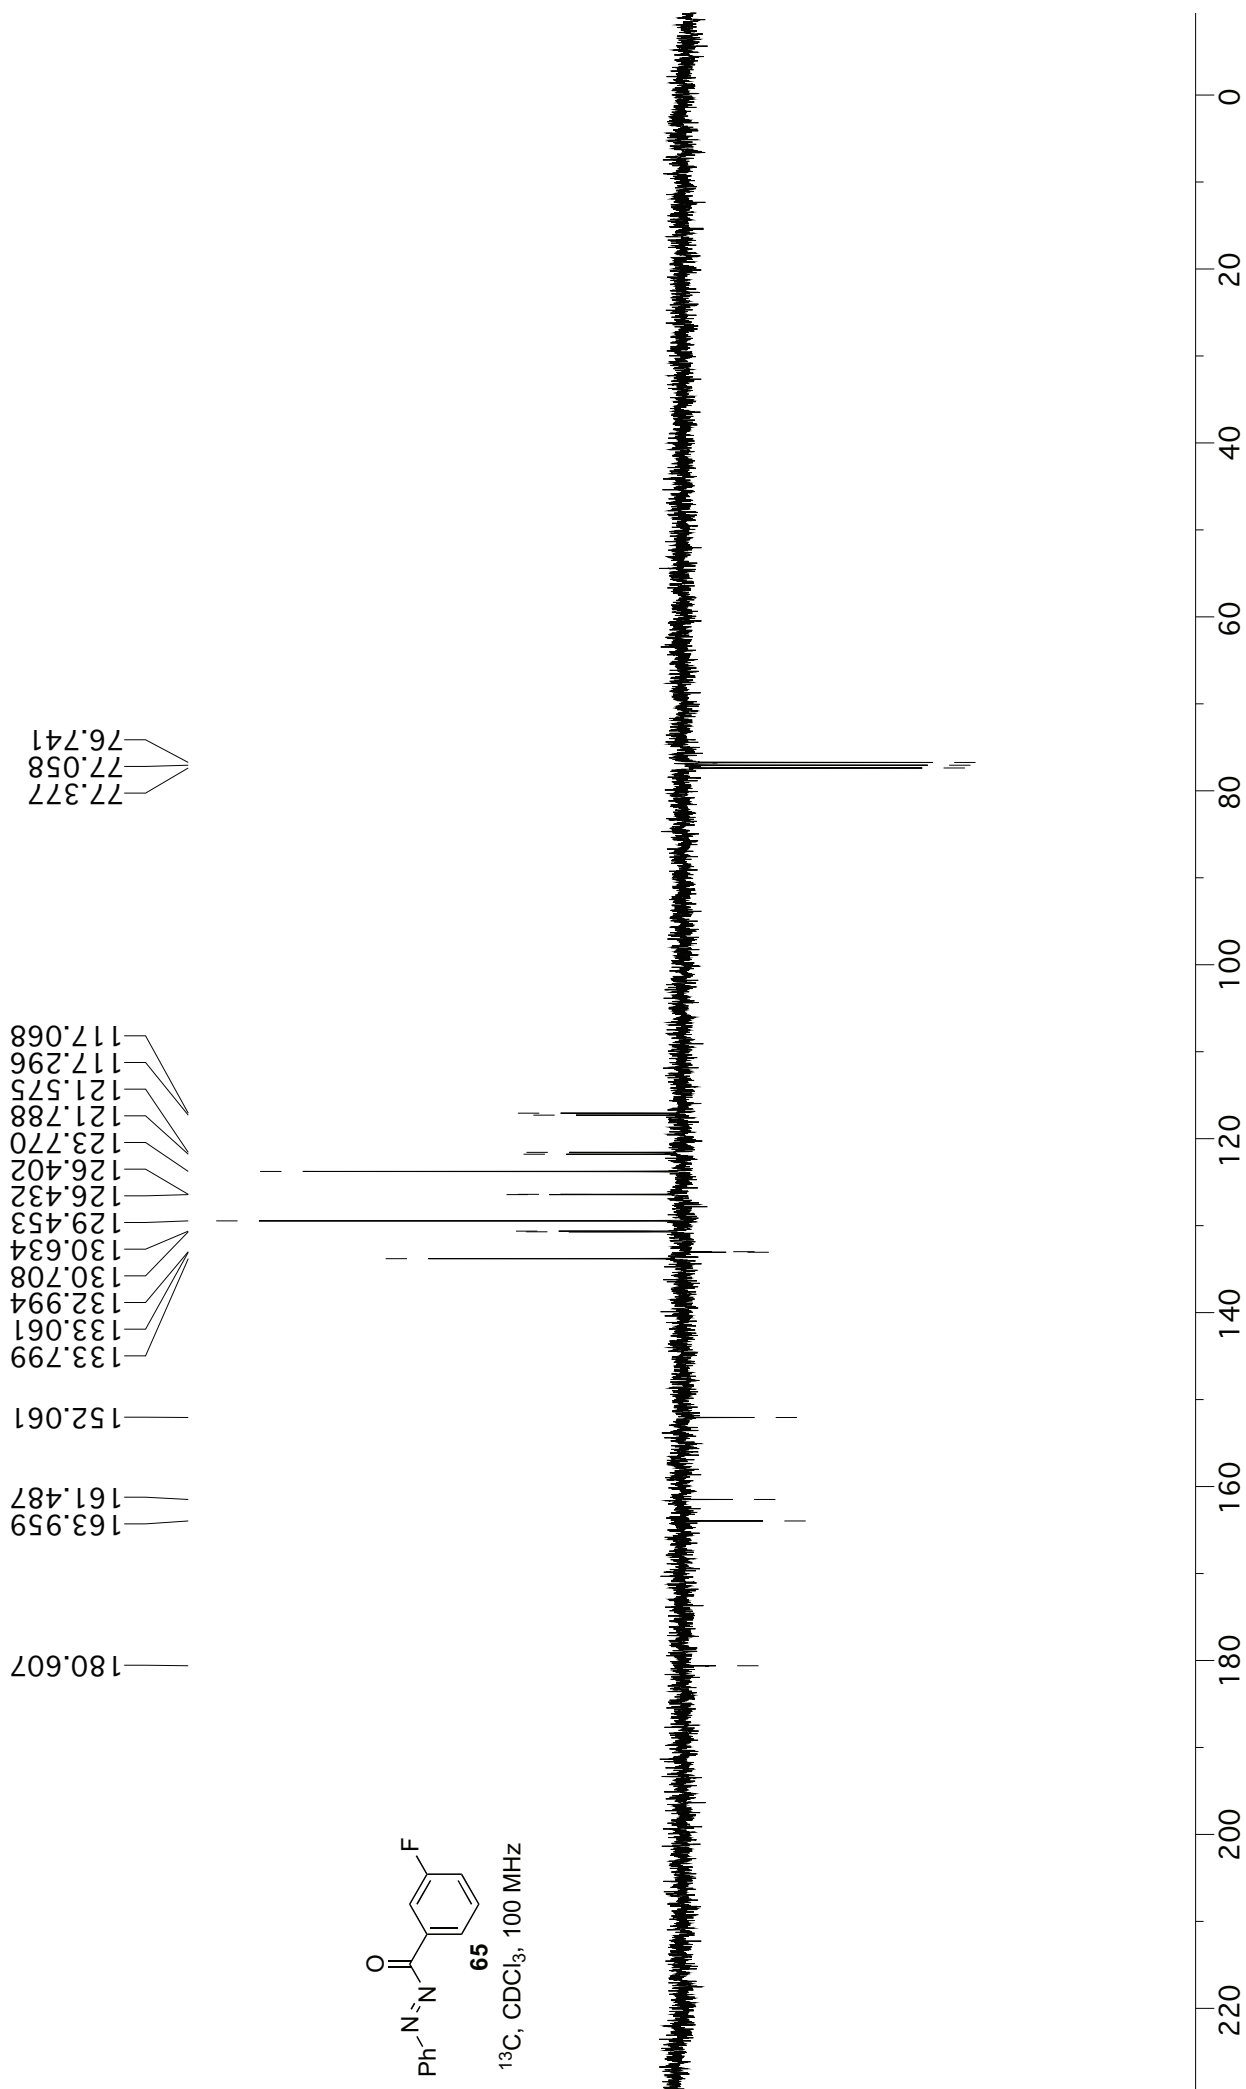



8.154  
8.148  
8.130  
8.128  
8.125  
8.122  
8.105  
8.099  
8.018  
8.013  
8.007  
8.005  
7.999  
7.992  
7.985  
7.981  
7.712  
7.705  
7.695  
7.687  
7.684  
7.681  
7.678  
7.670  
7.667  
7.664  
7.661  
7.660  
7.656  
7.653  
7.643  
7.636  
7.634  
7.629  
7.621  
7.617  
7.611  
7.604  
7.598  
7.591  
7.586  
7.575  
7.572  
7.566  
7.562  
7.556  
7.384  
7.380  
7.358  
7.355  
7.333  
7.330  
7.235  
7.231  
7.207  
7.203  
7.199  
7.196  
7.171  
7.168

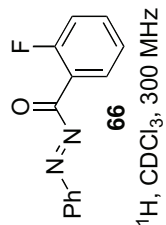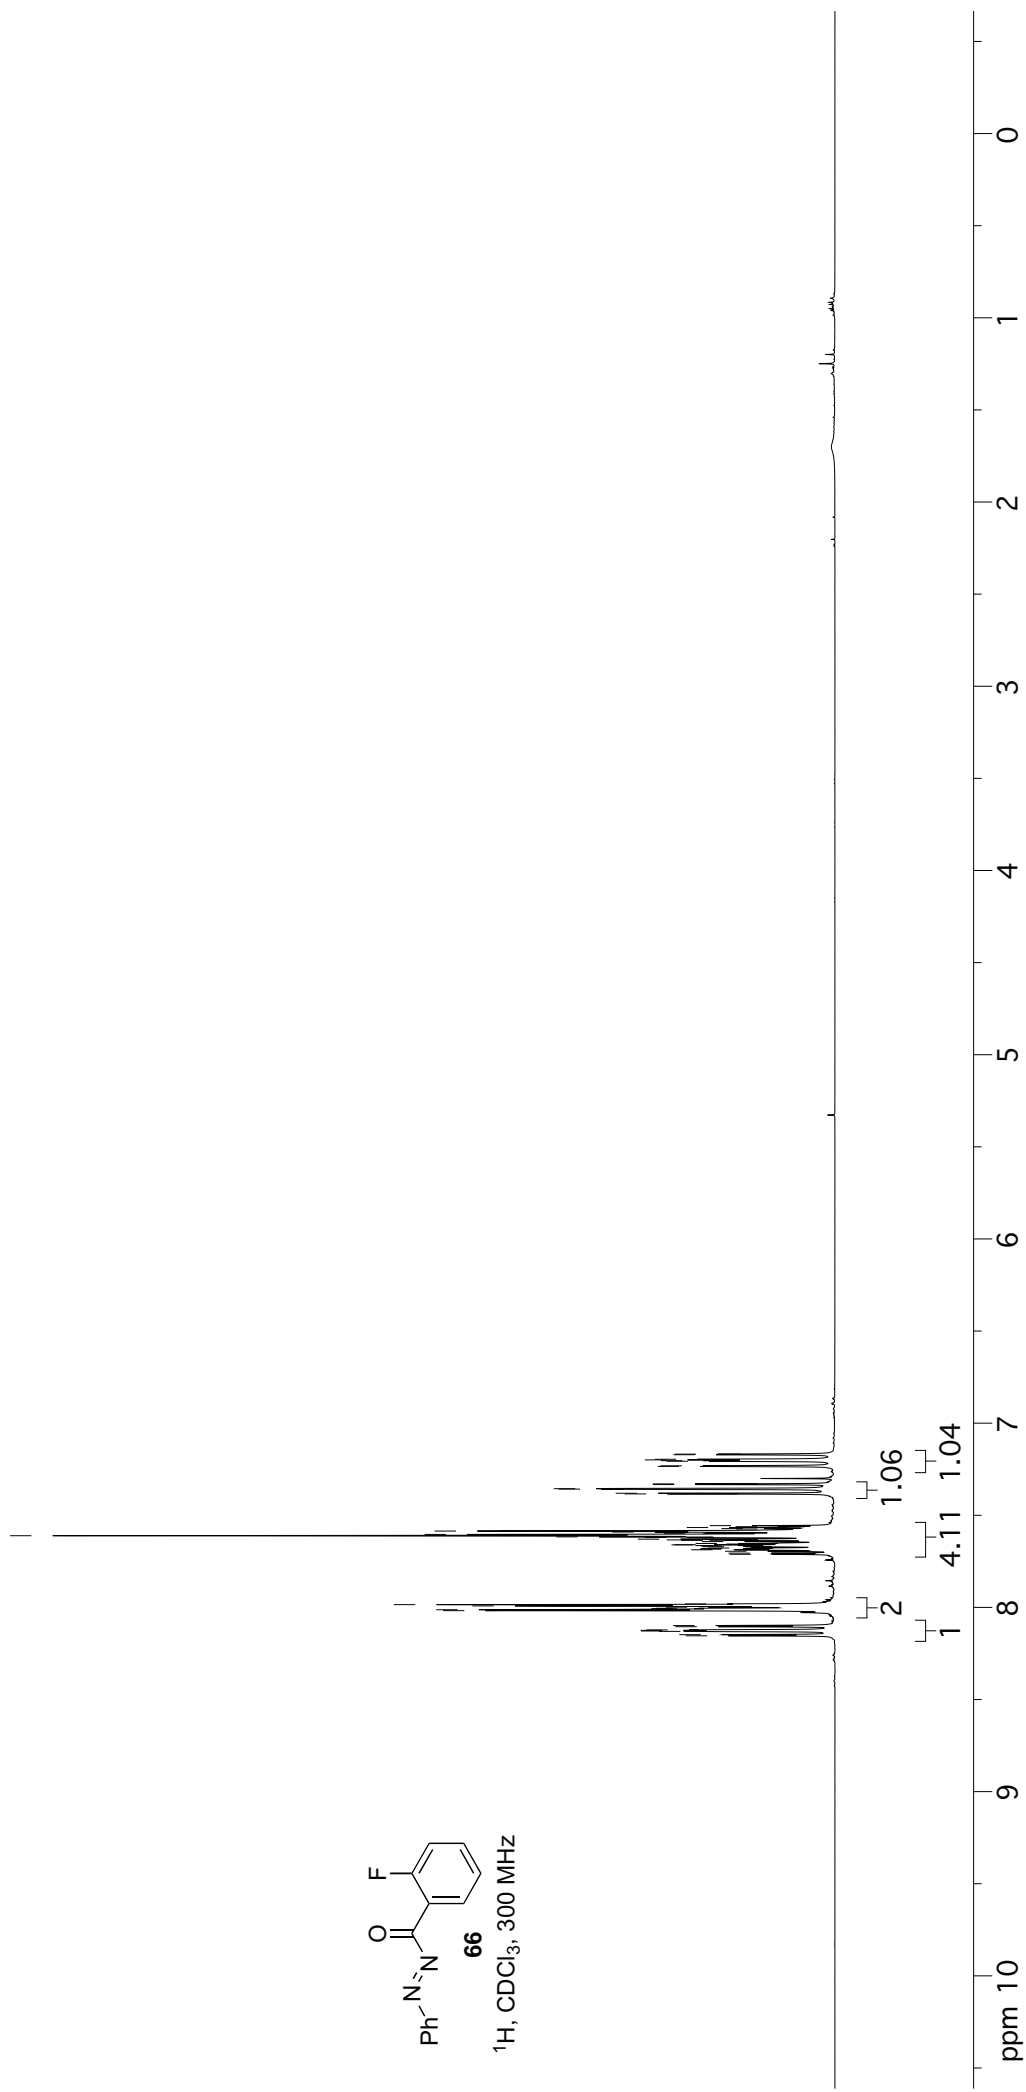

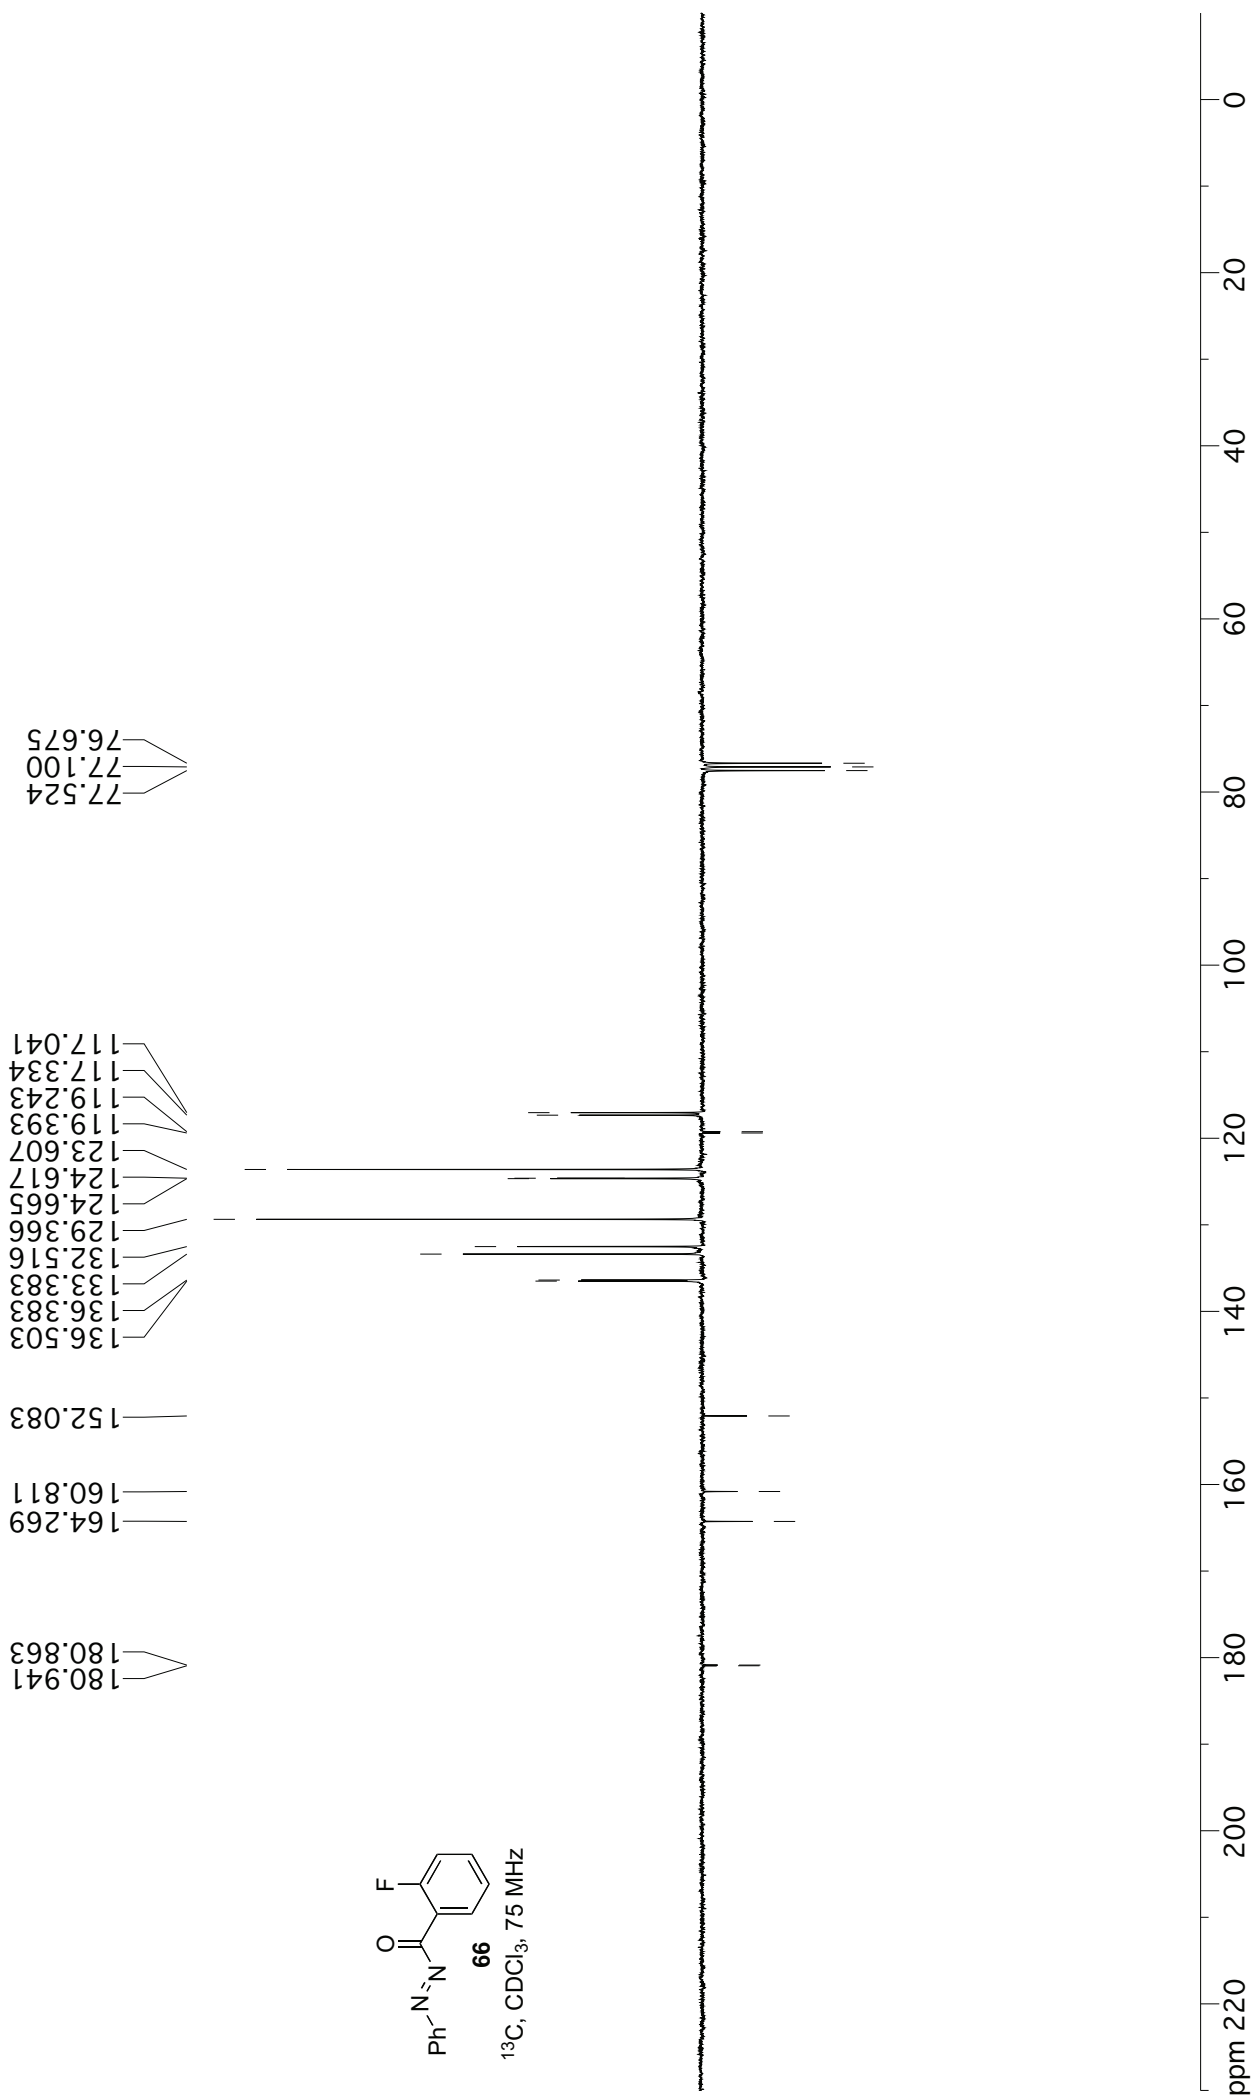

8.071  
8.064  
8.057  
8.052  
8.041  
8.035  
8.027  
8.022  
8.015  
8.012  
8.009  
7.672  
7.649  
7.646  
7.638  
7.632  
7.626  
7.620  
7.615  
7.606  
7.604  
7.601  
7.596  
7.586  
7.581  
7.576  
7.573  
7.567  
7.549  
7.541  
7.535  
7.519  
7.512  
7.504  
7.287

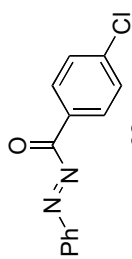

<sup>1</sup>H, CDCl<sub>3</sub>, 300 MHz

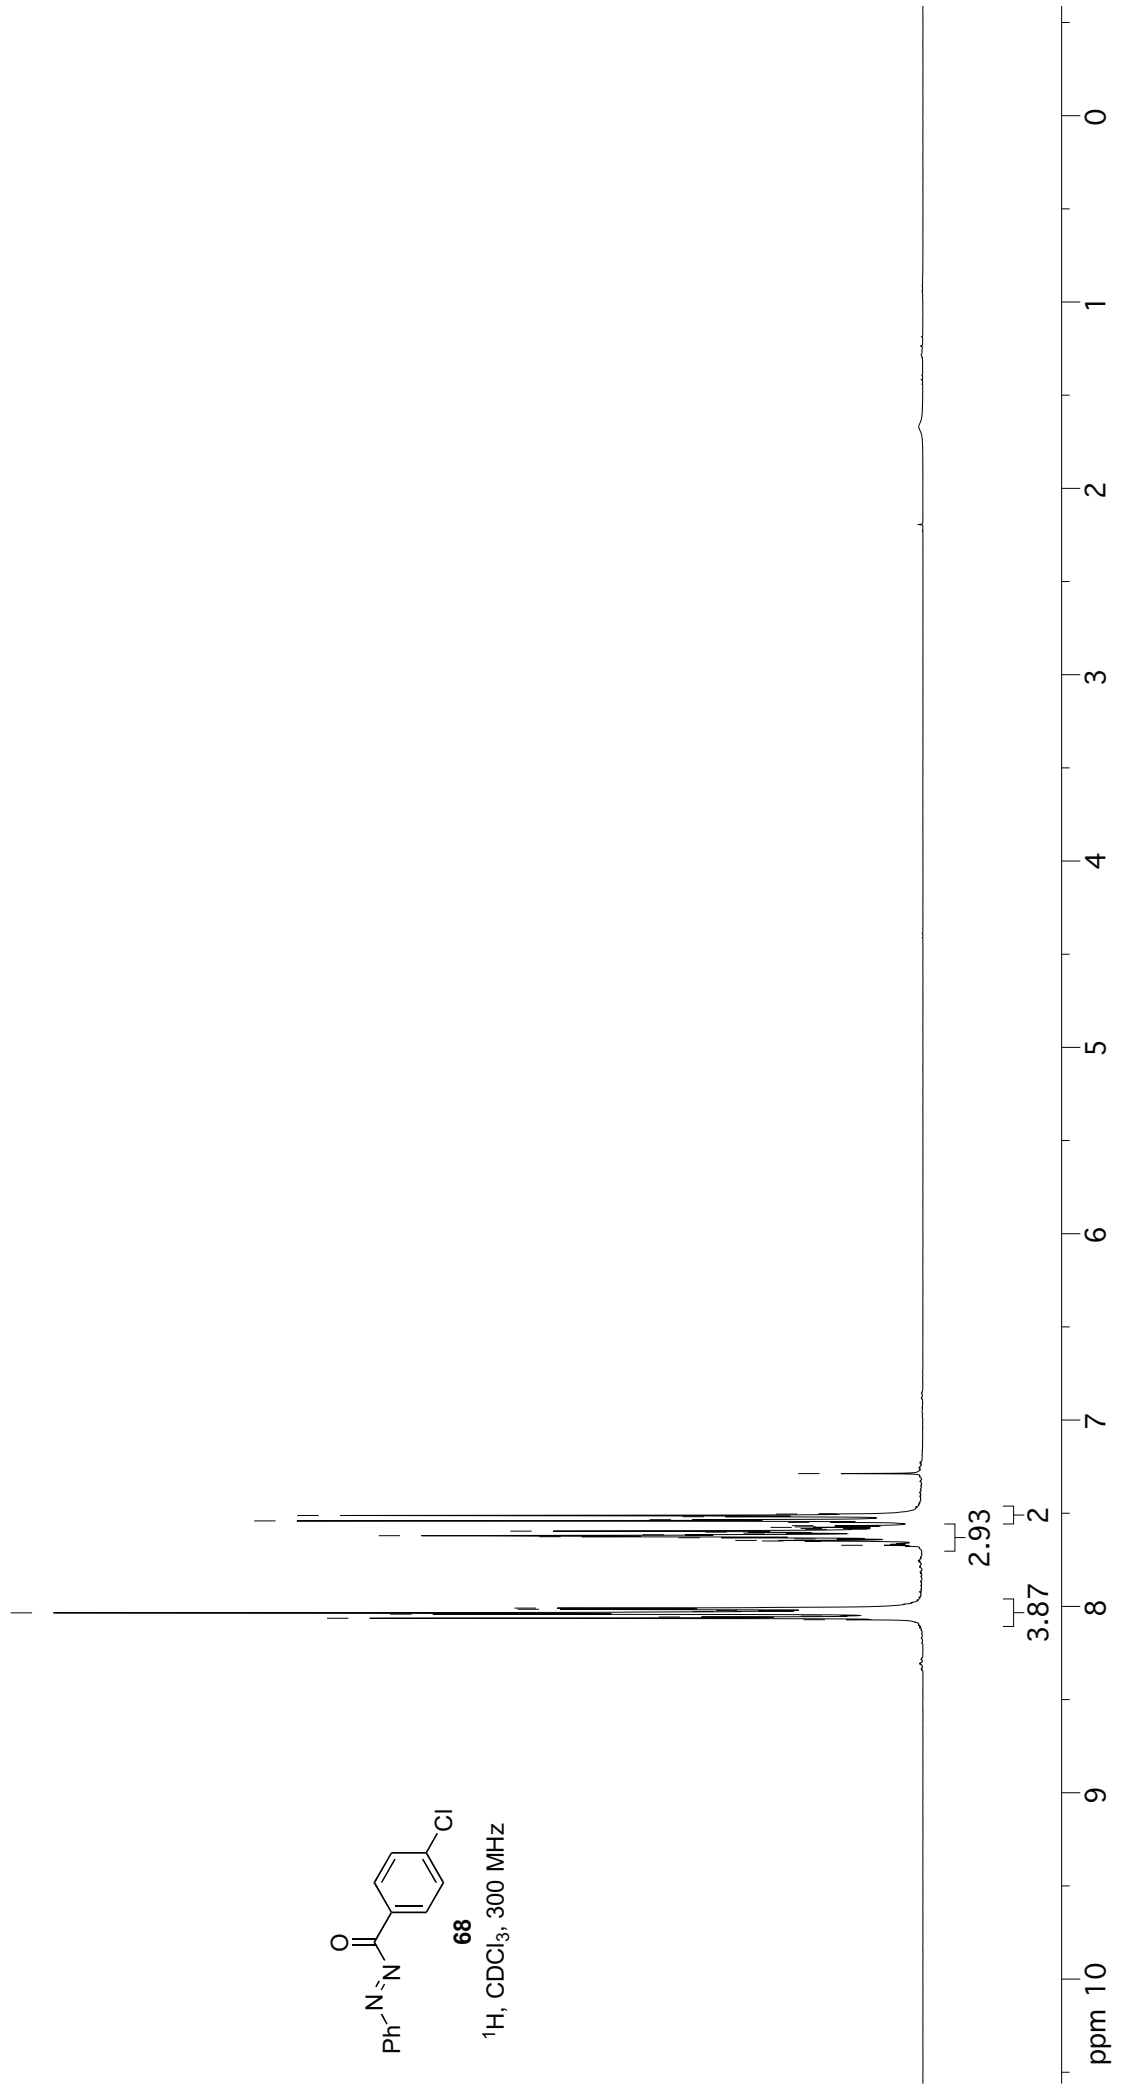

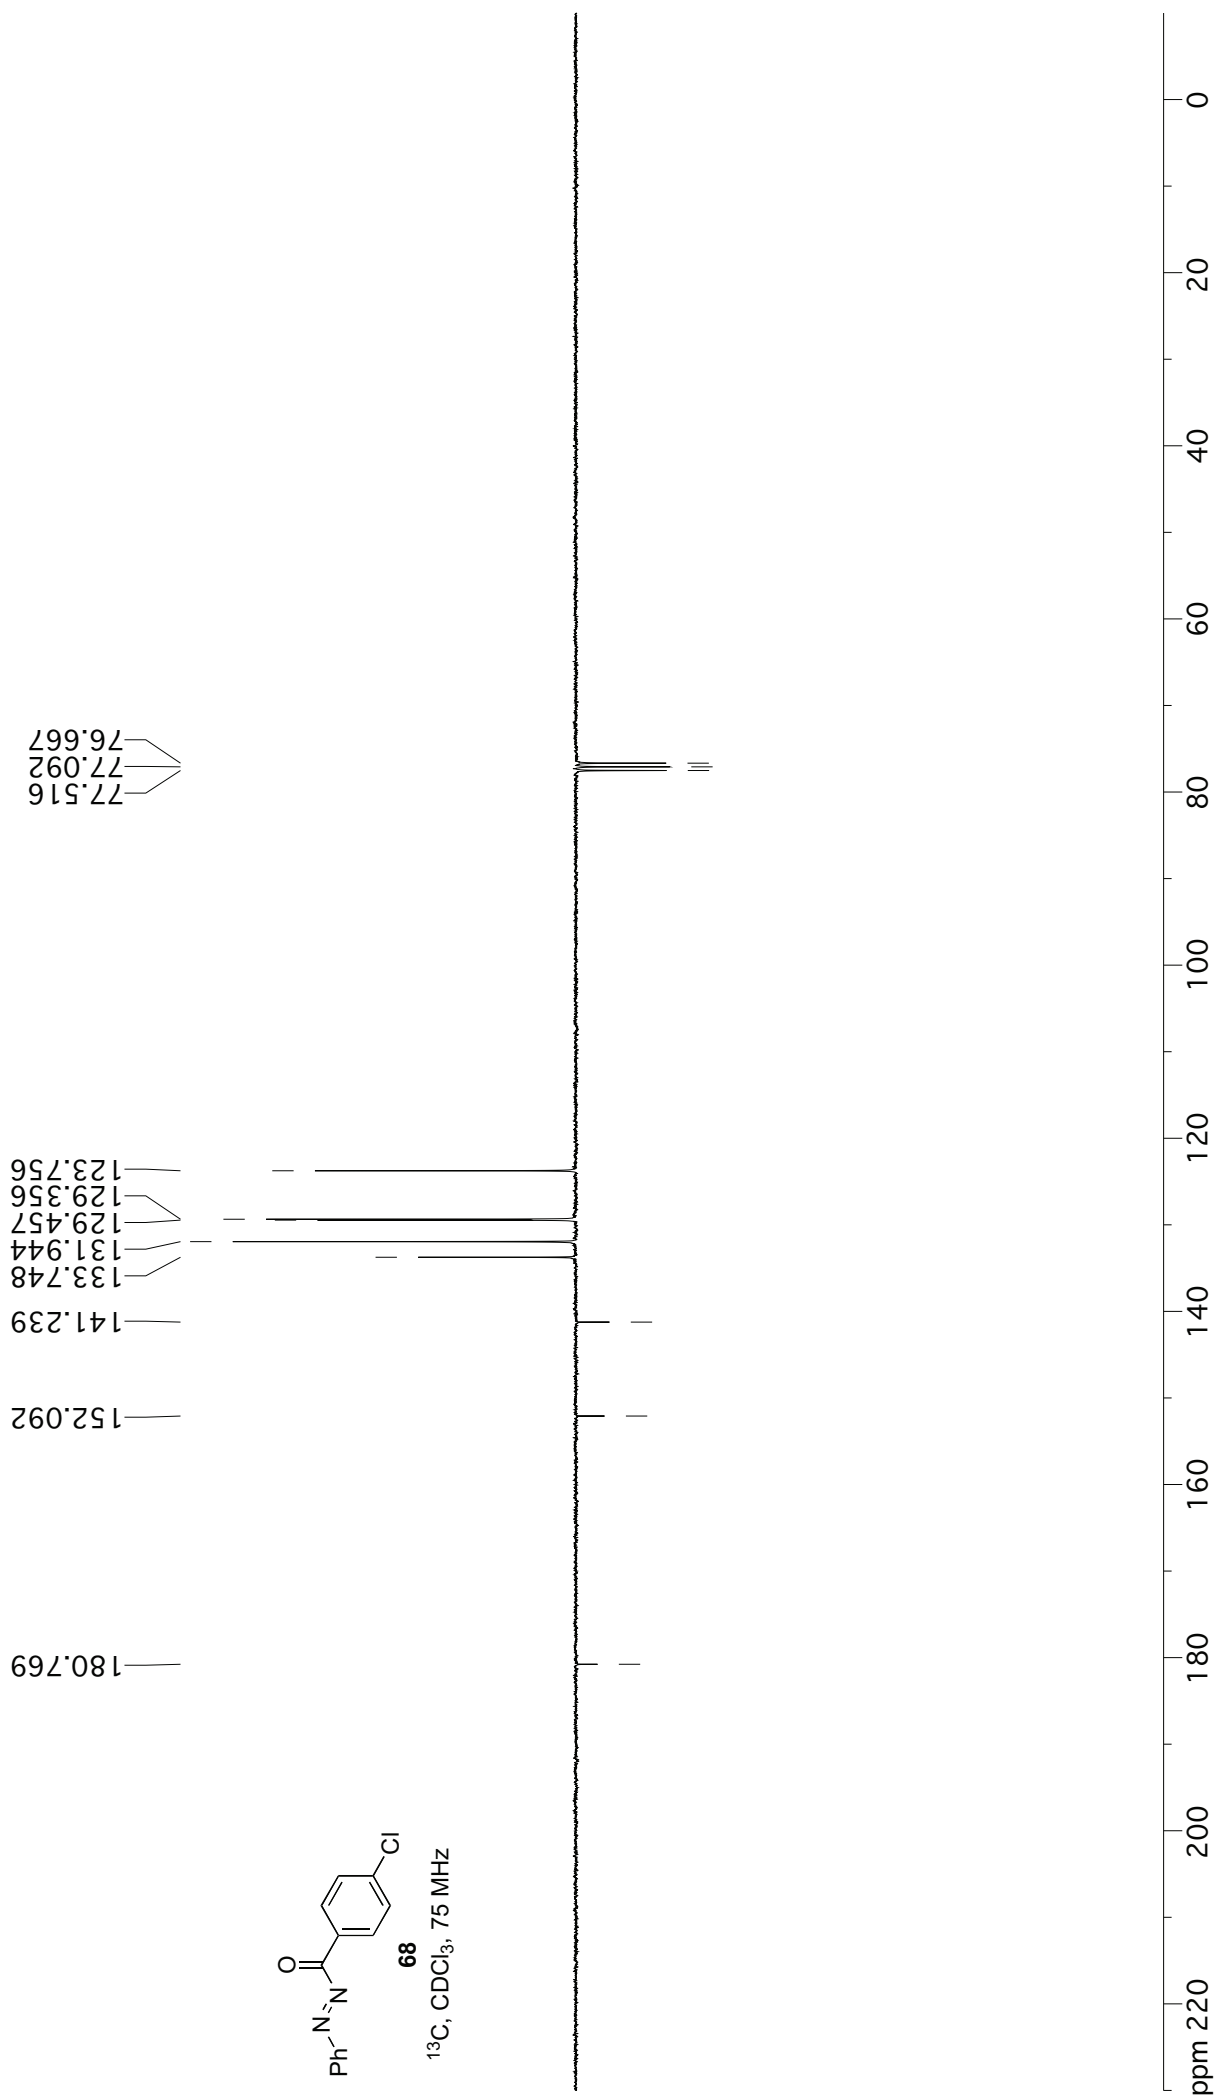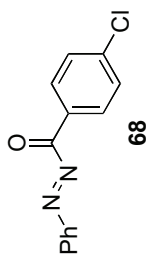

$^{13}\text{C}$ ,  $\text{CDCl}_3$ , 75 MHz

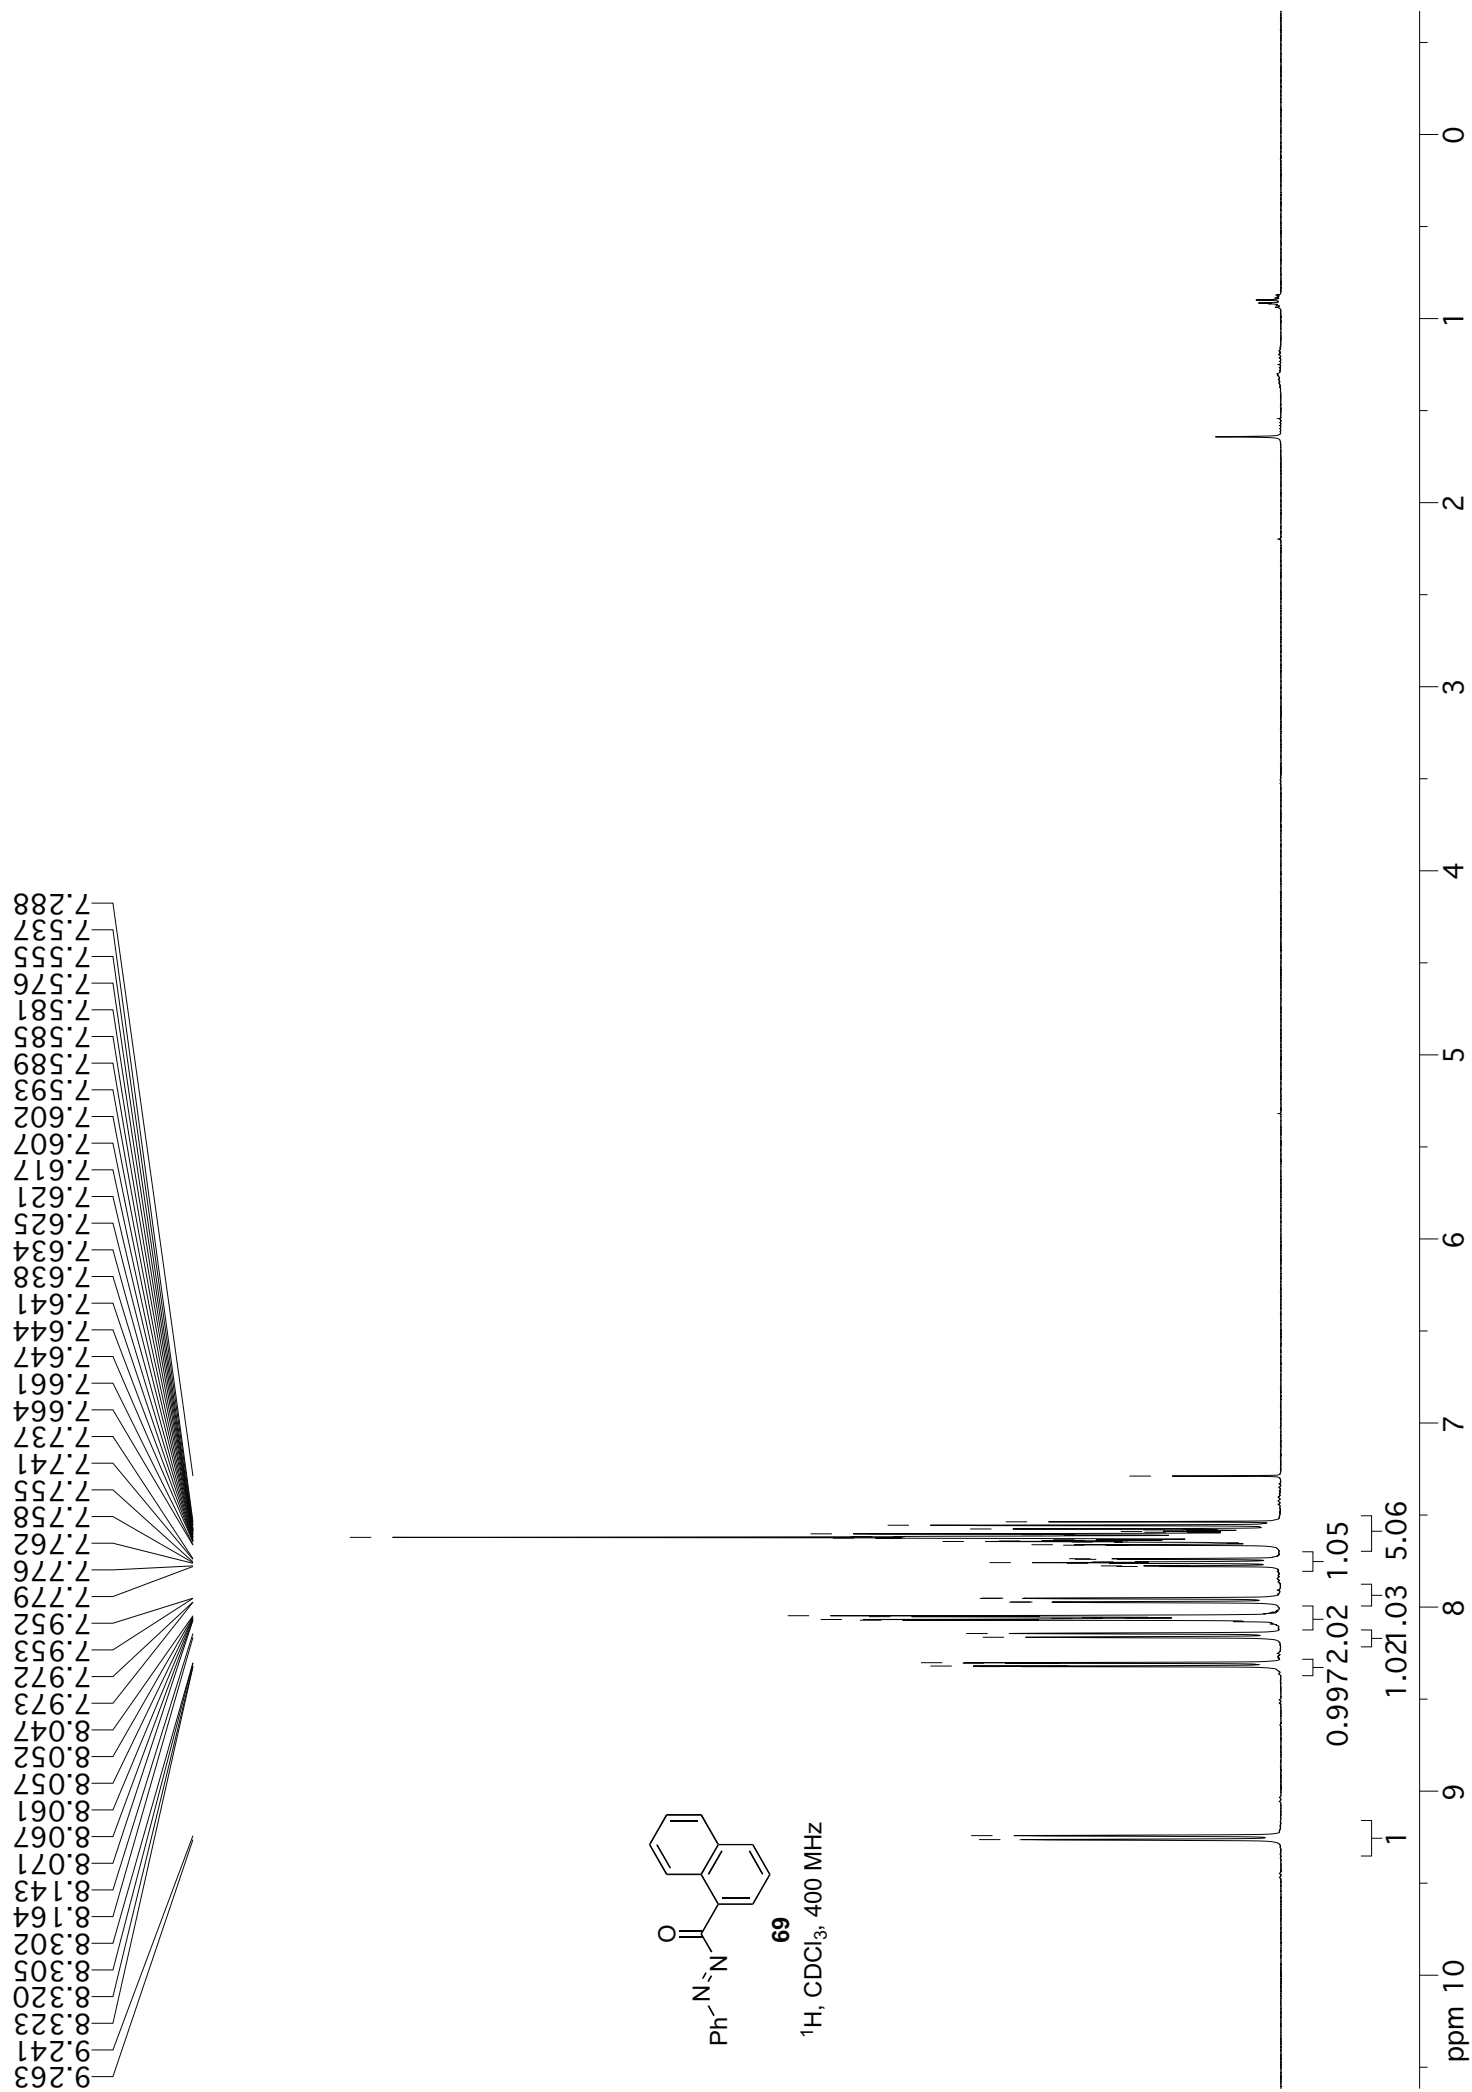

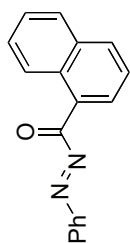

**69**

$^{13}\text{C}$ ,  $\text{CDCl}_3$ , 100 MHz

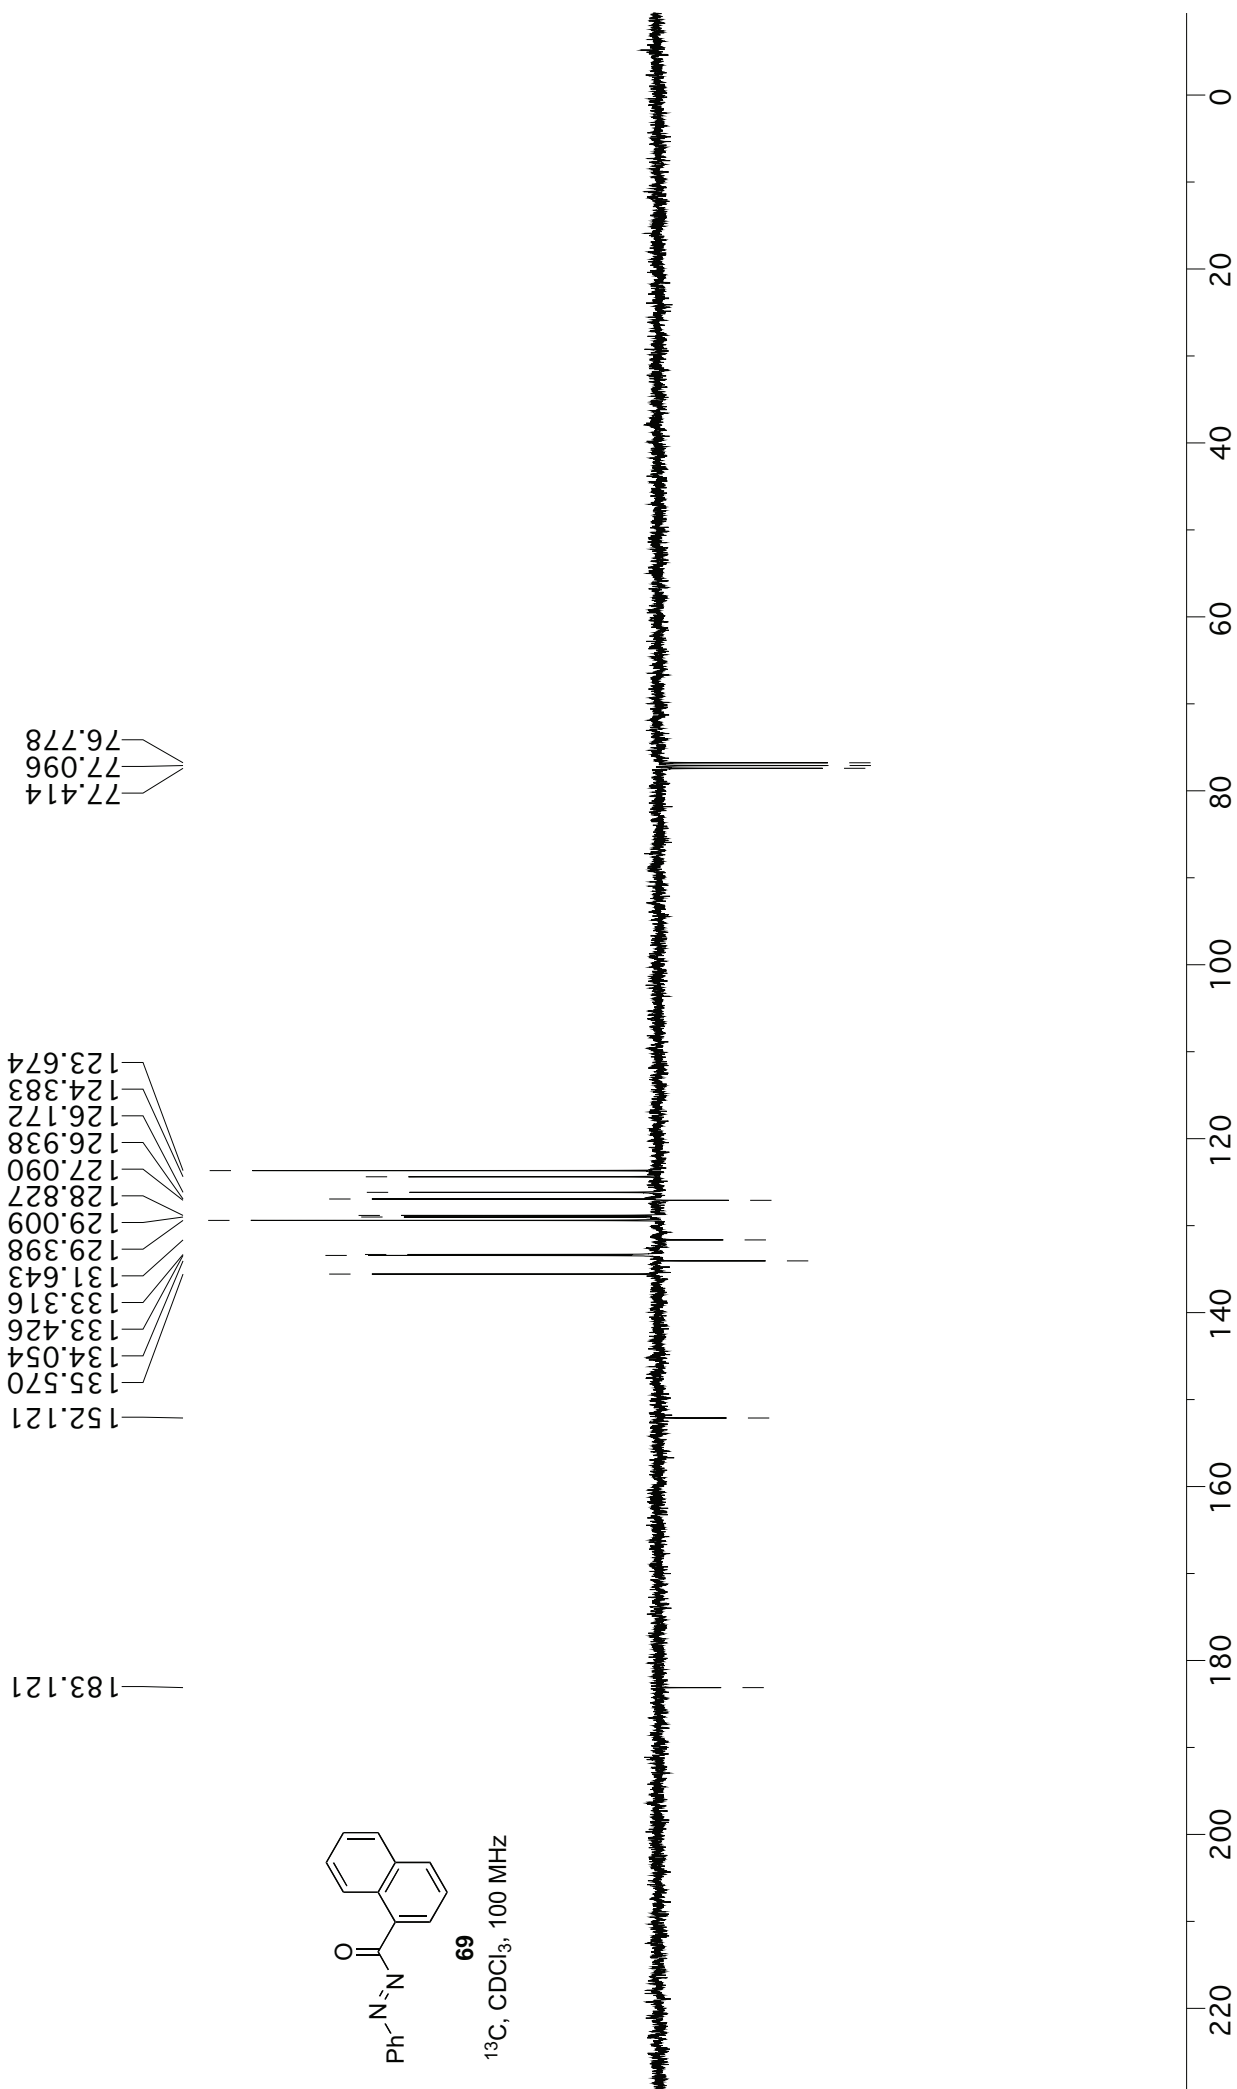

8.329  
8.322  
8.315  
8.299  
8.292  
8.286  
8.229  
8.223  
8.216  
8.200  
8.193  
8.186  
7.973  
7.968  
7.963  
7.953  
7.946  
7.940  
7.617  
7.593  
7.584  
7.575  
7.570  
7.564  
7.554  
7.550  
7.537  
7.534  
7.530  
7.521  
7.513  
7.508  
7.501

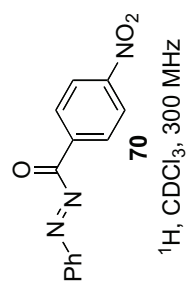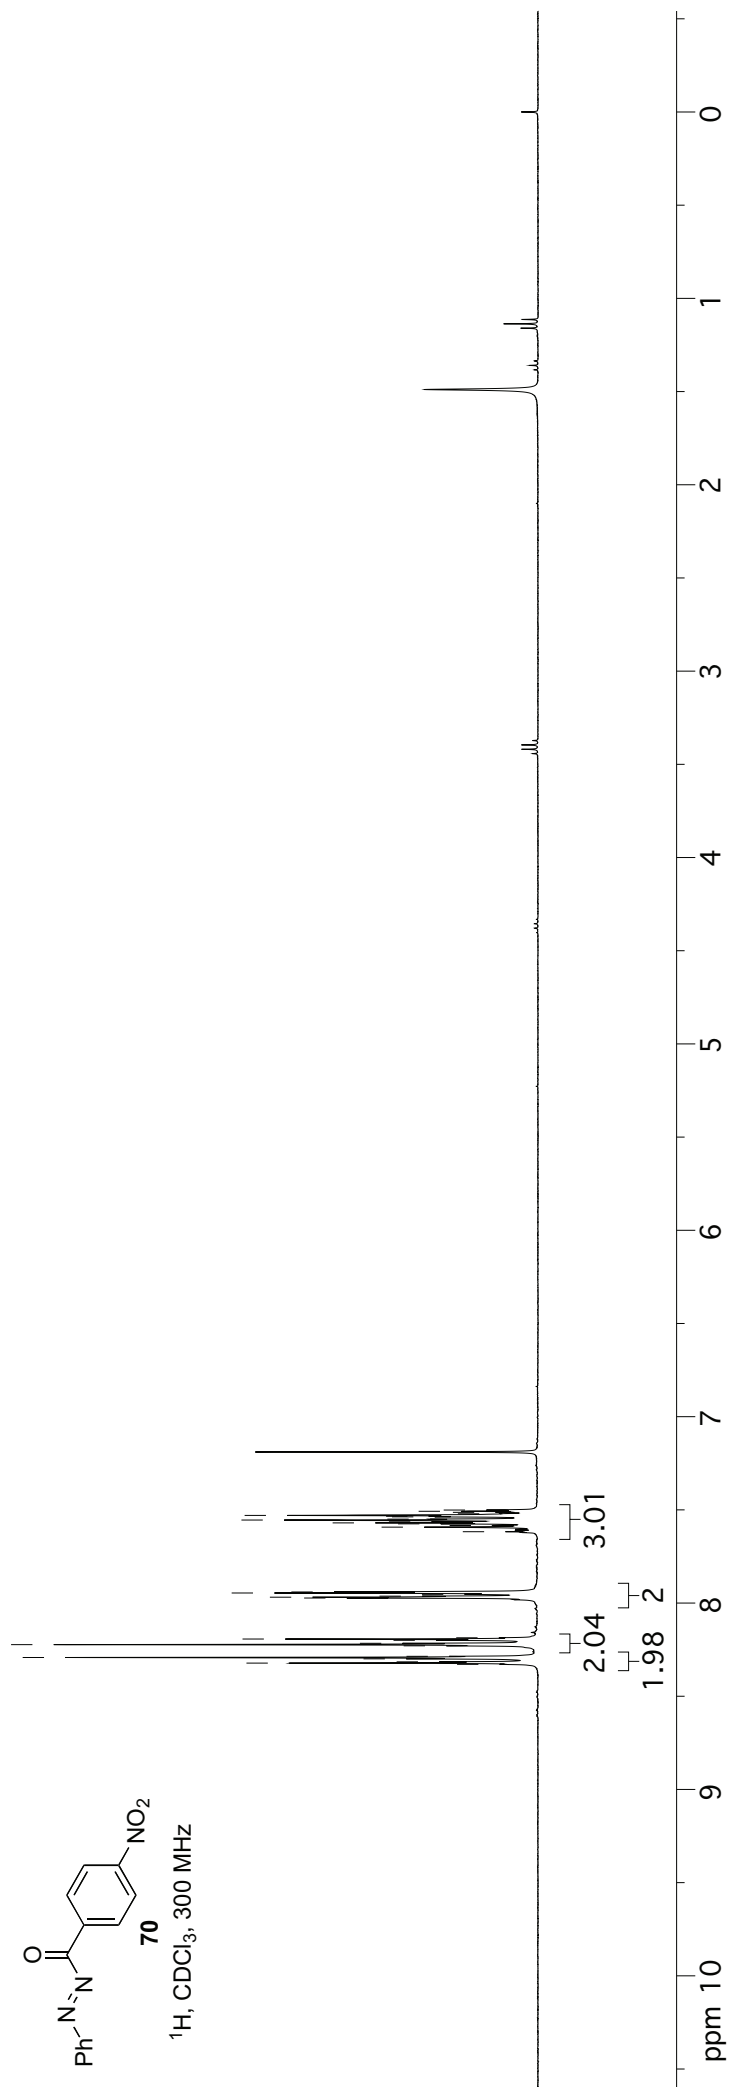

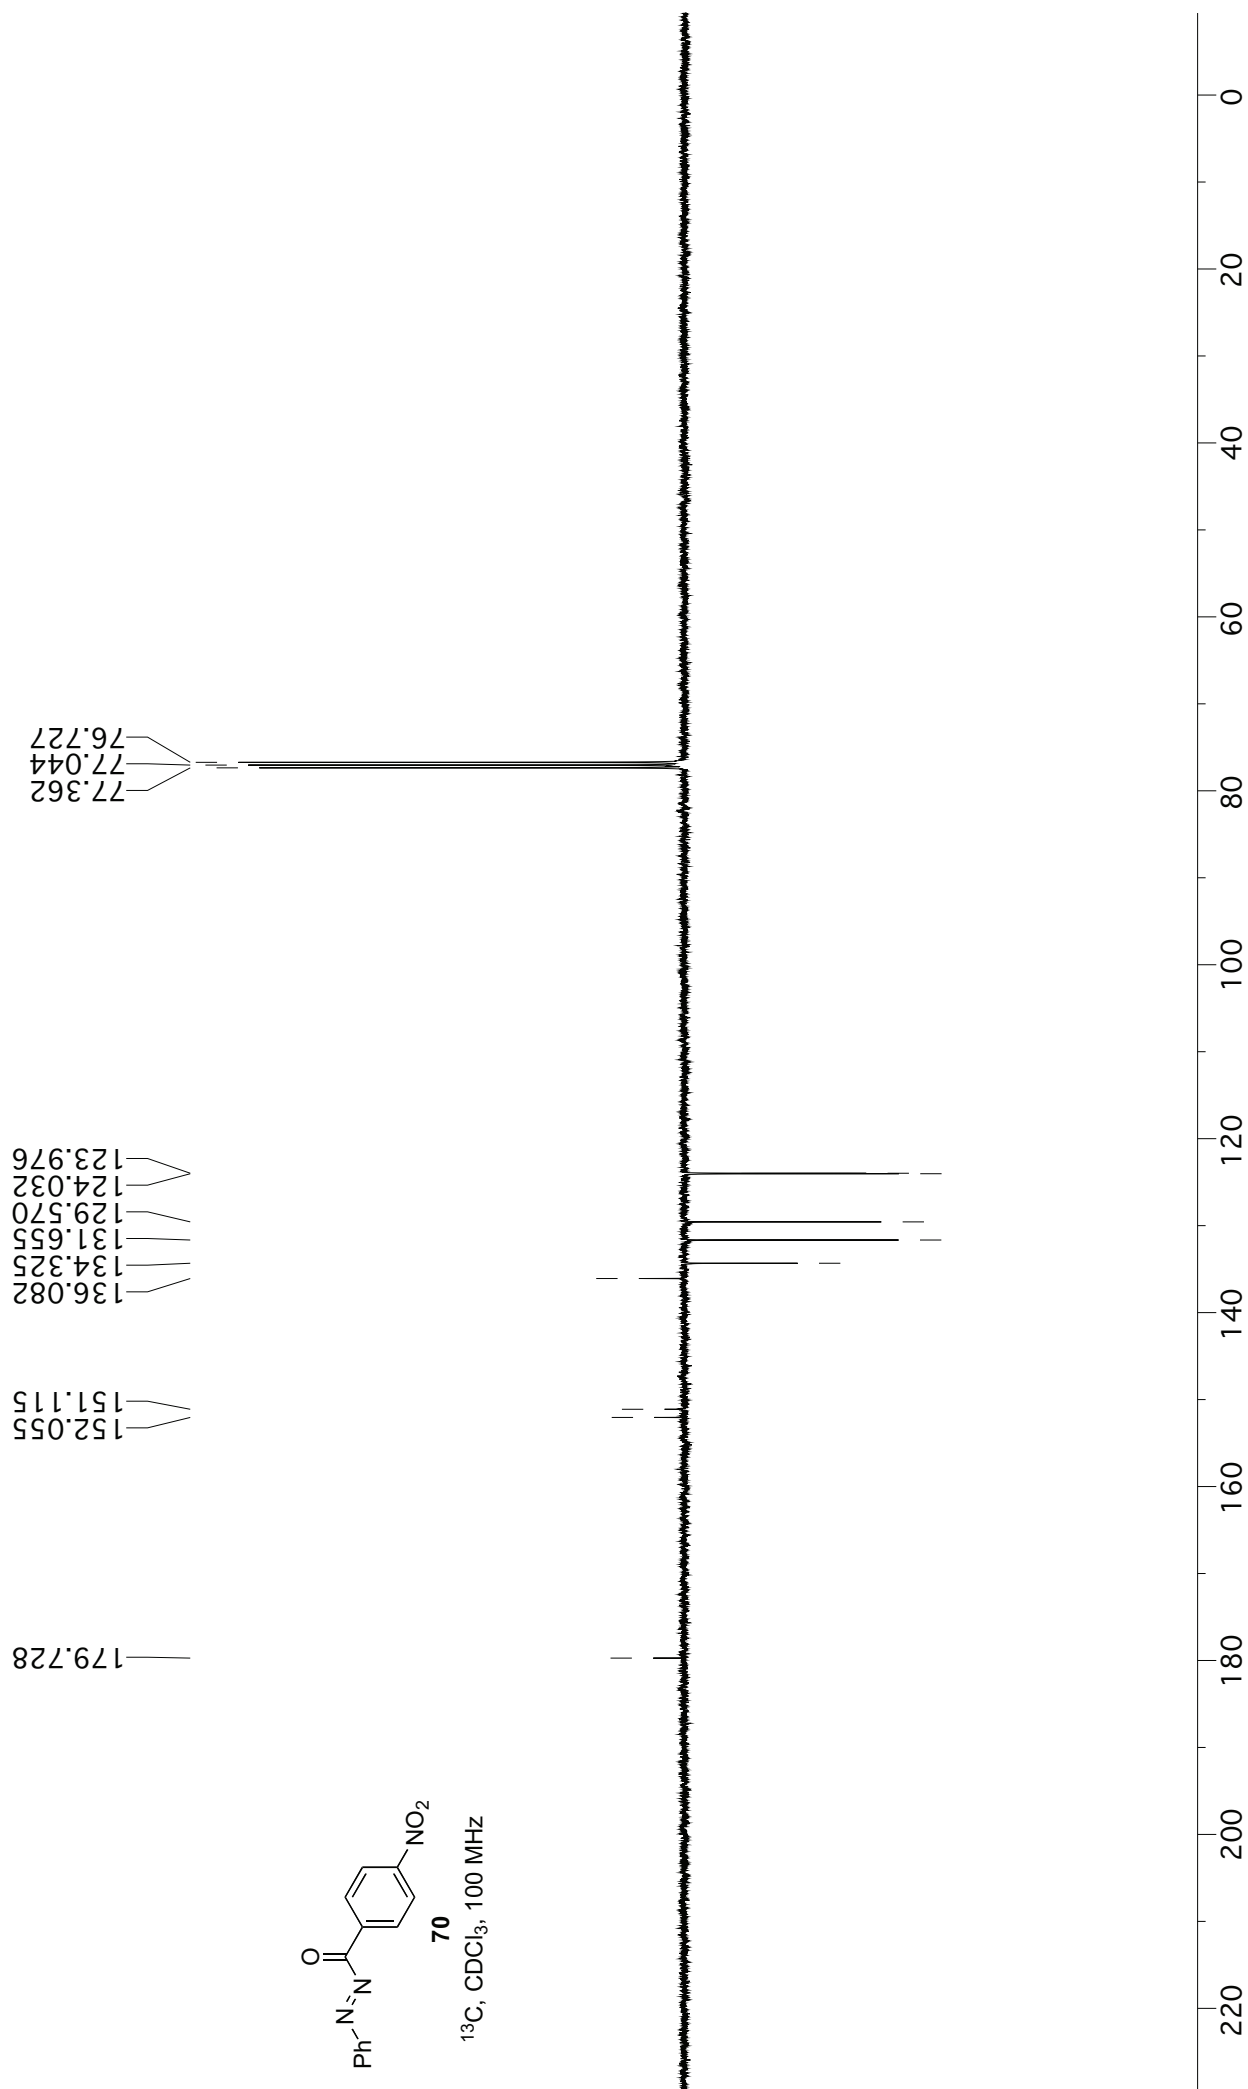



8.105  
8.084  
8.056  
8.038  
7.920  
7.899  
7.744  
7.726  
7.707  
7.593  
7.573  
7.554  
7.288

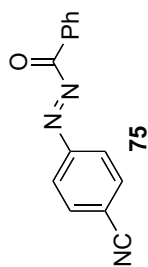

<sup>1</sup>H, CDCl<sub>3</sub>, 400 MHz

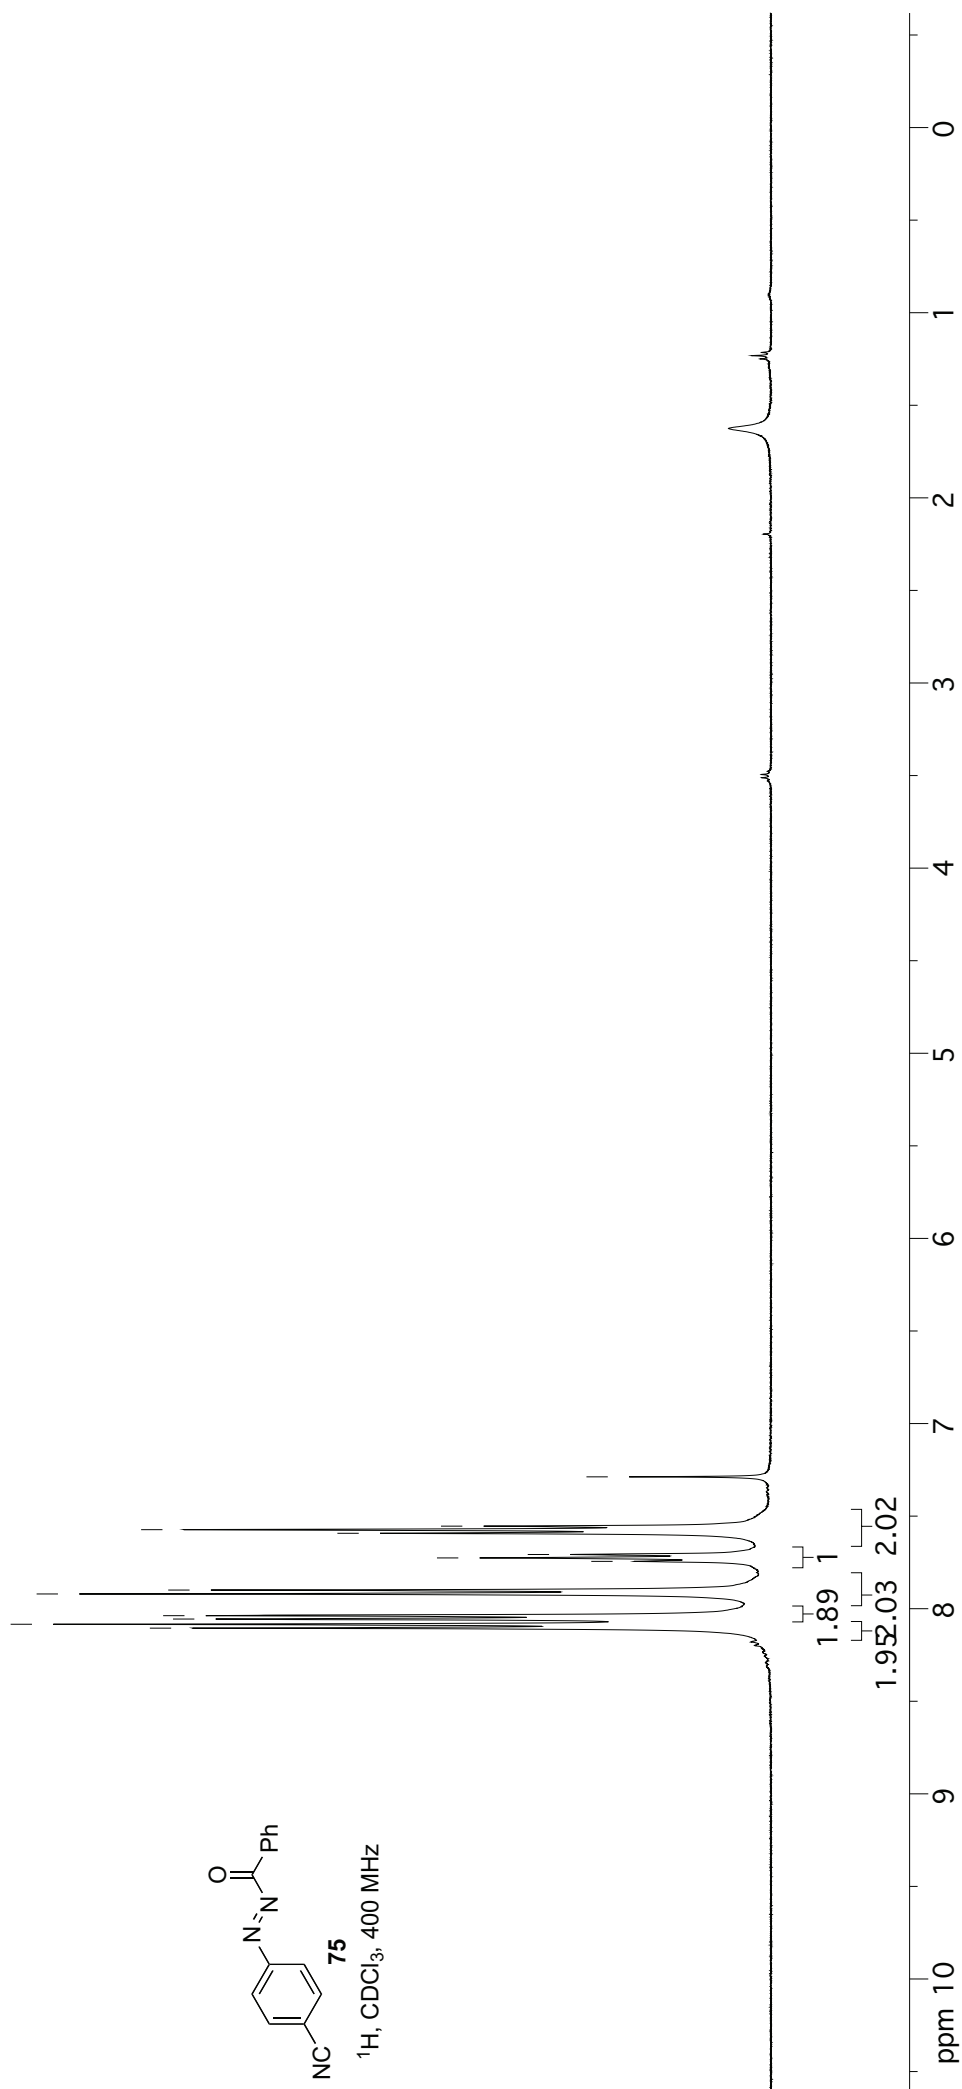

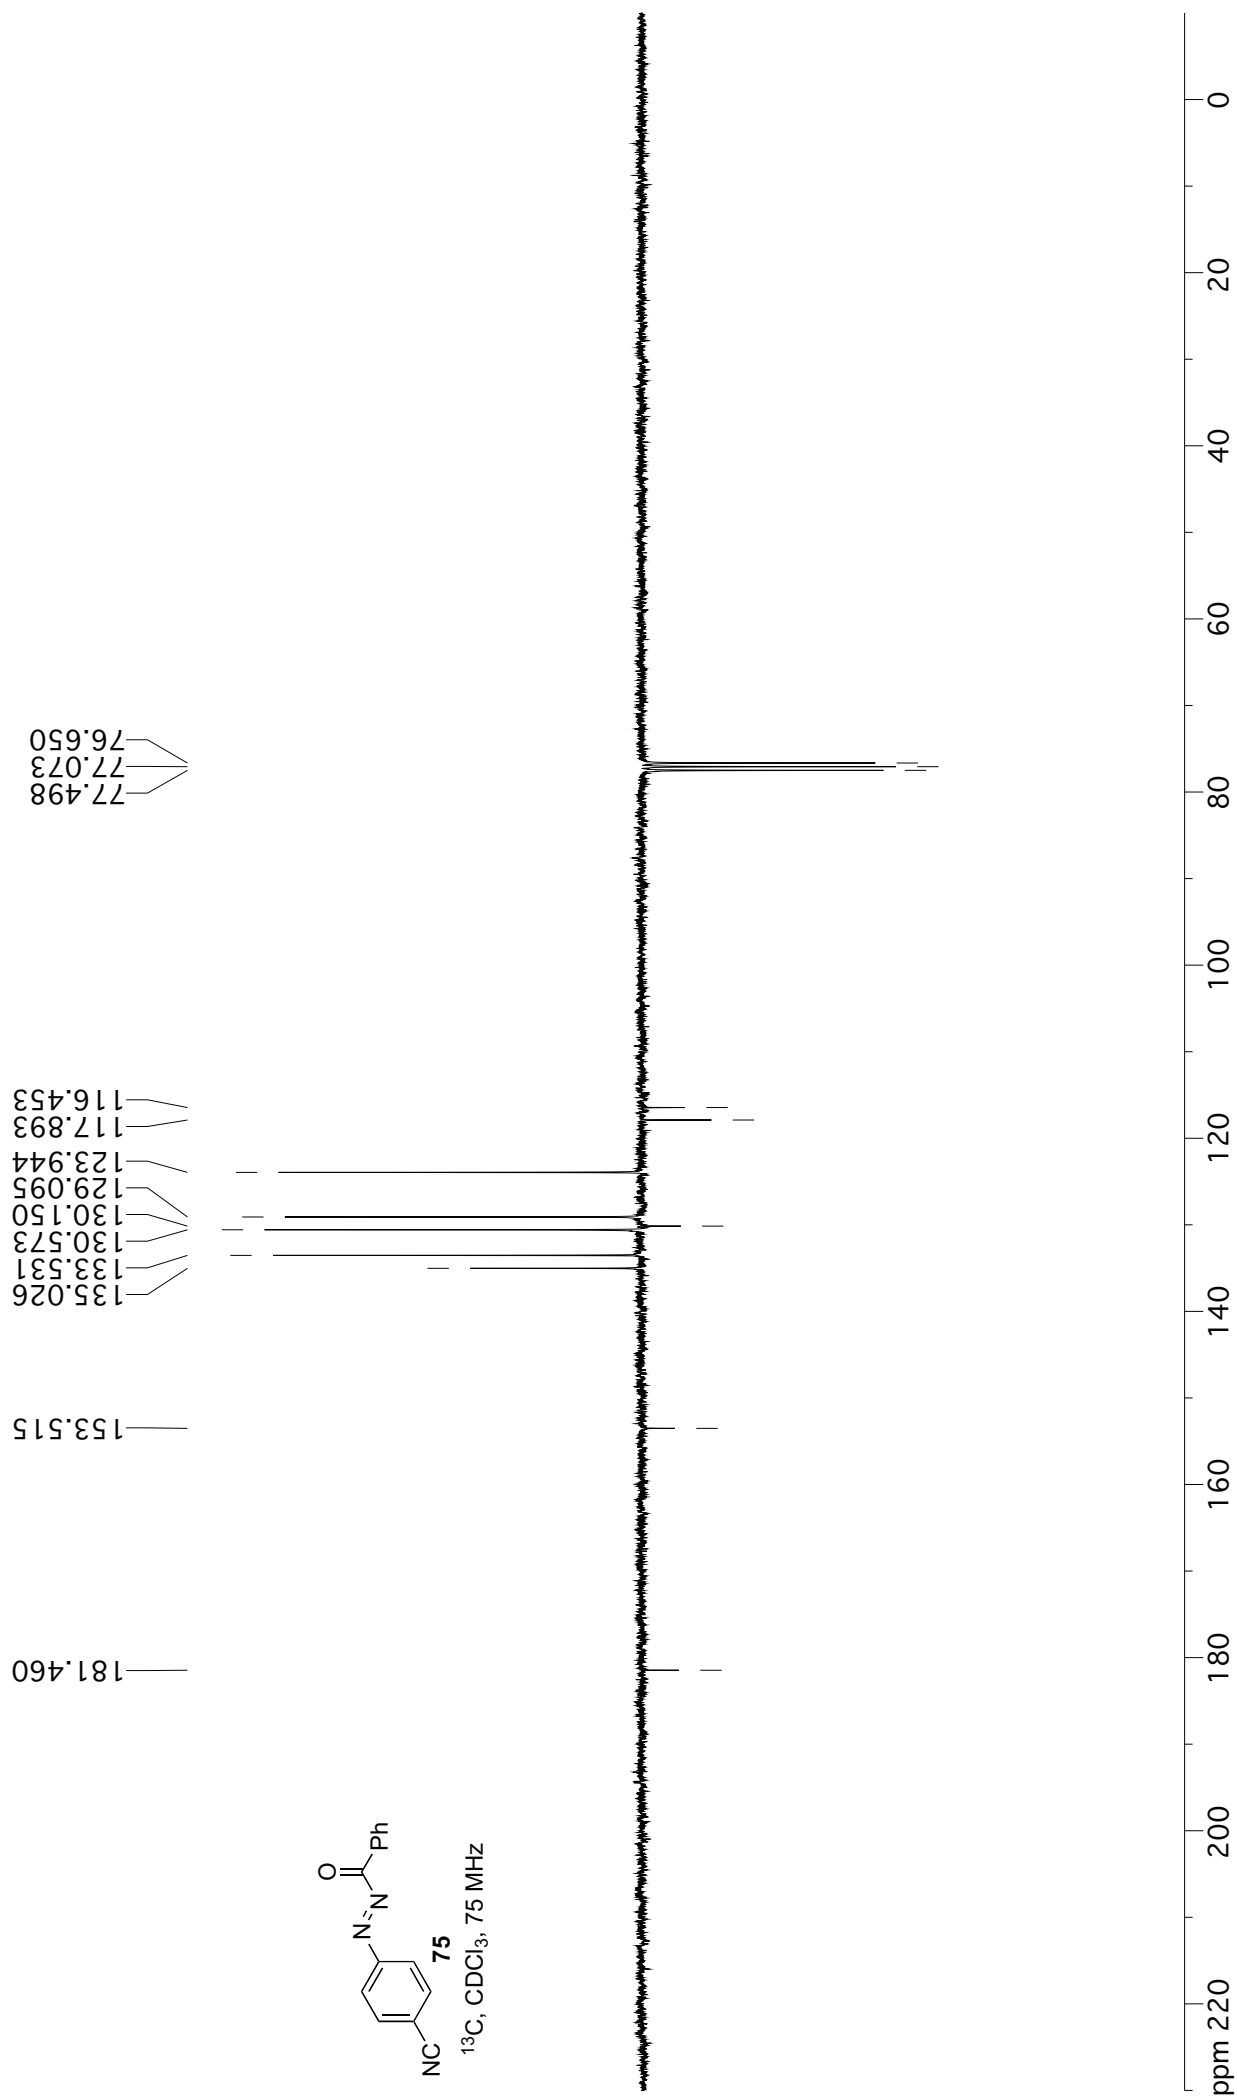

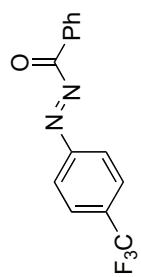

<sup>1</sup>H, CDCl<sub>3</sub>, 500 MHz

8.011  
7.994  
7.960  
7.946  
7.943  
7.769  
7.752  
7.620  
7.605  
7.590  
7.473  
7.457  
7.442  
7.176

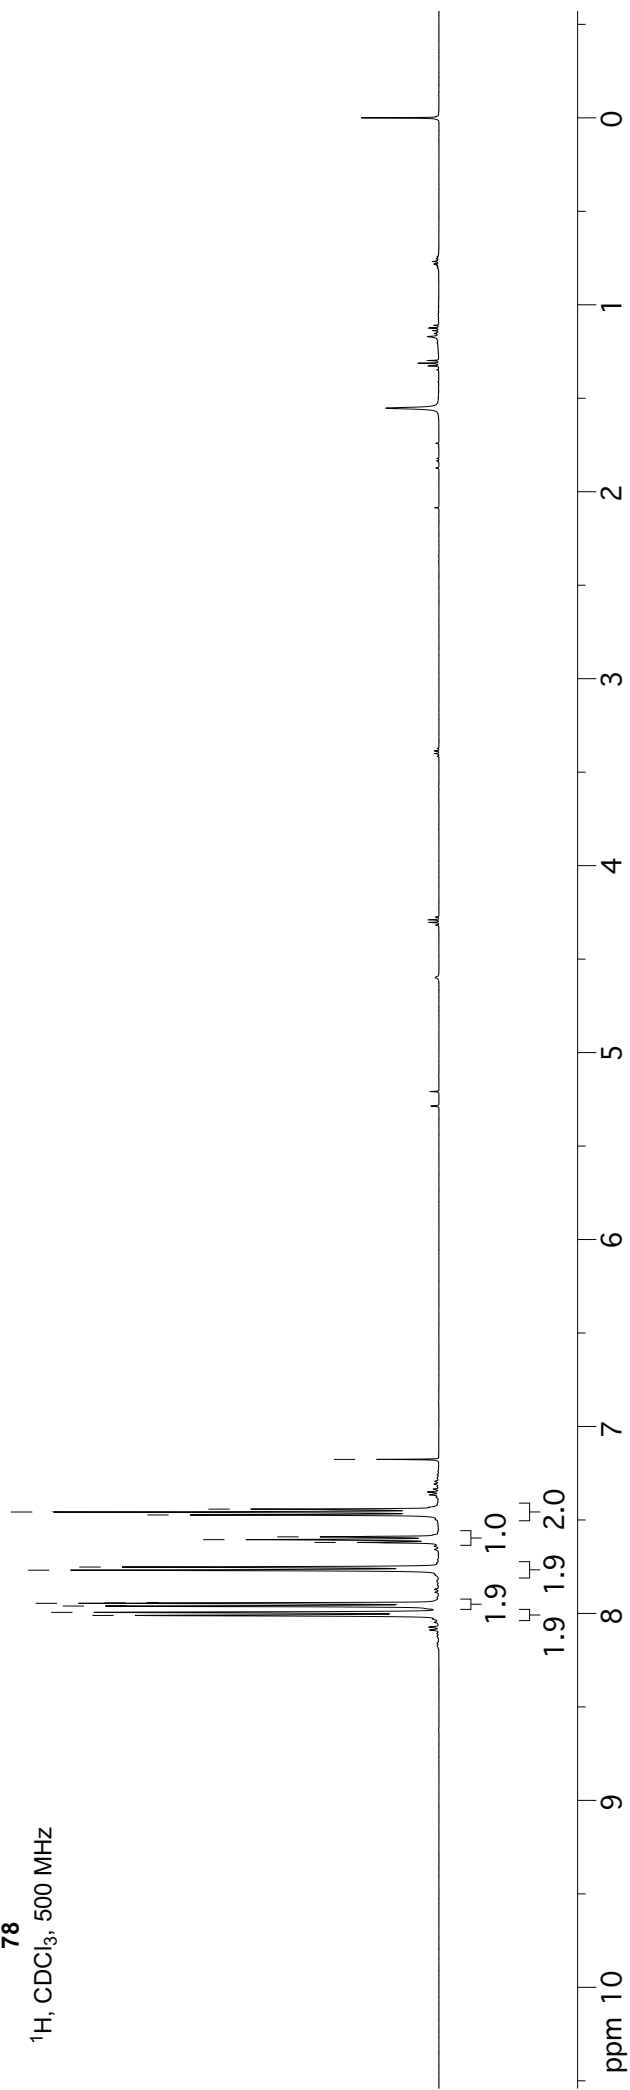

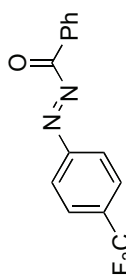

**79**

$^{13}\text{C}$ ,  $\text{CDCl}_3$ , 125 MHz

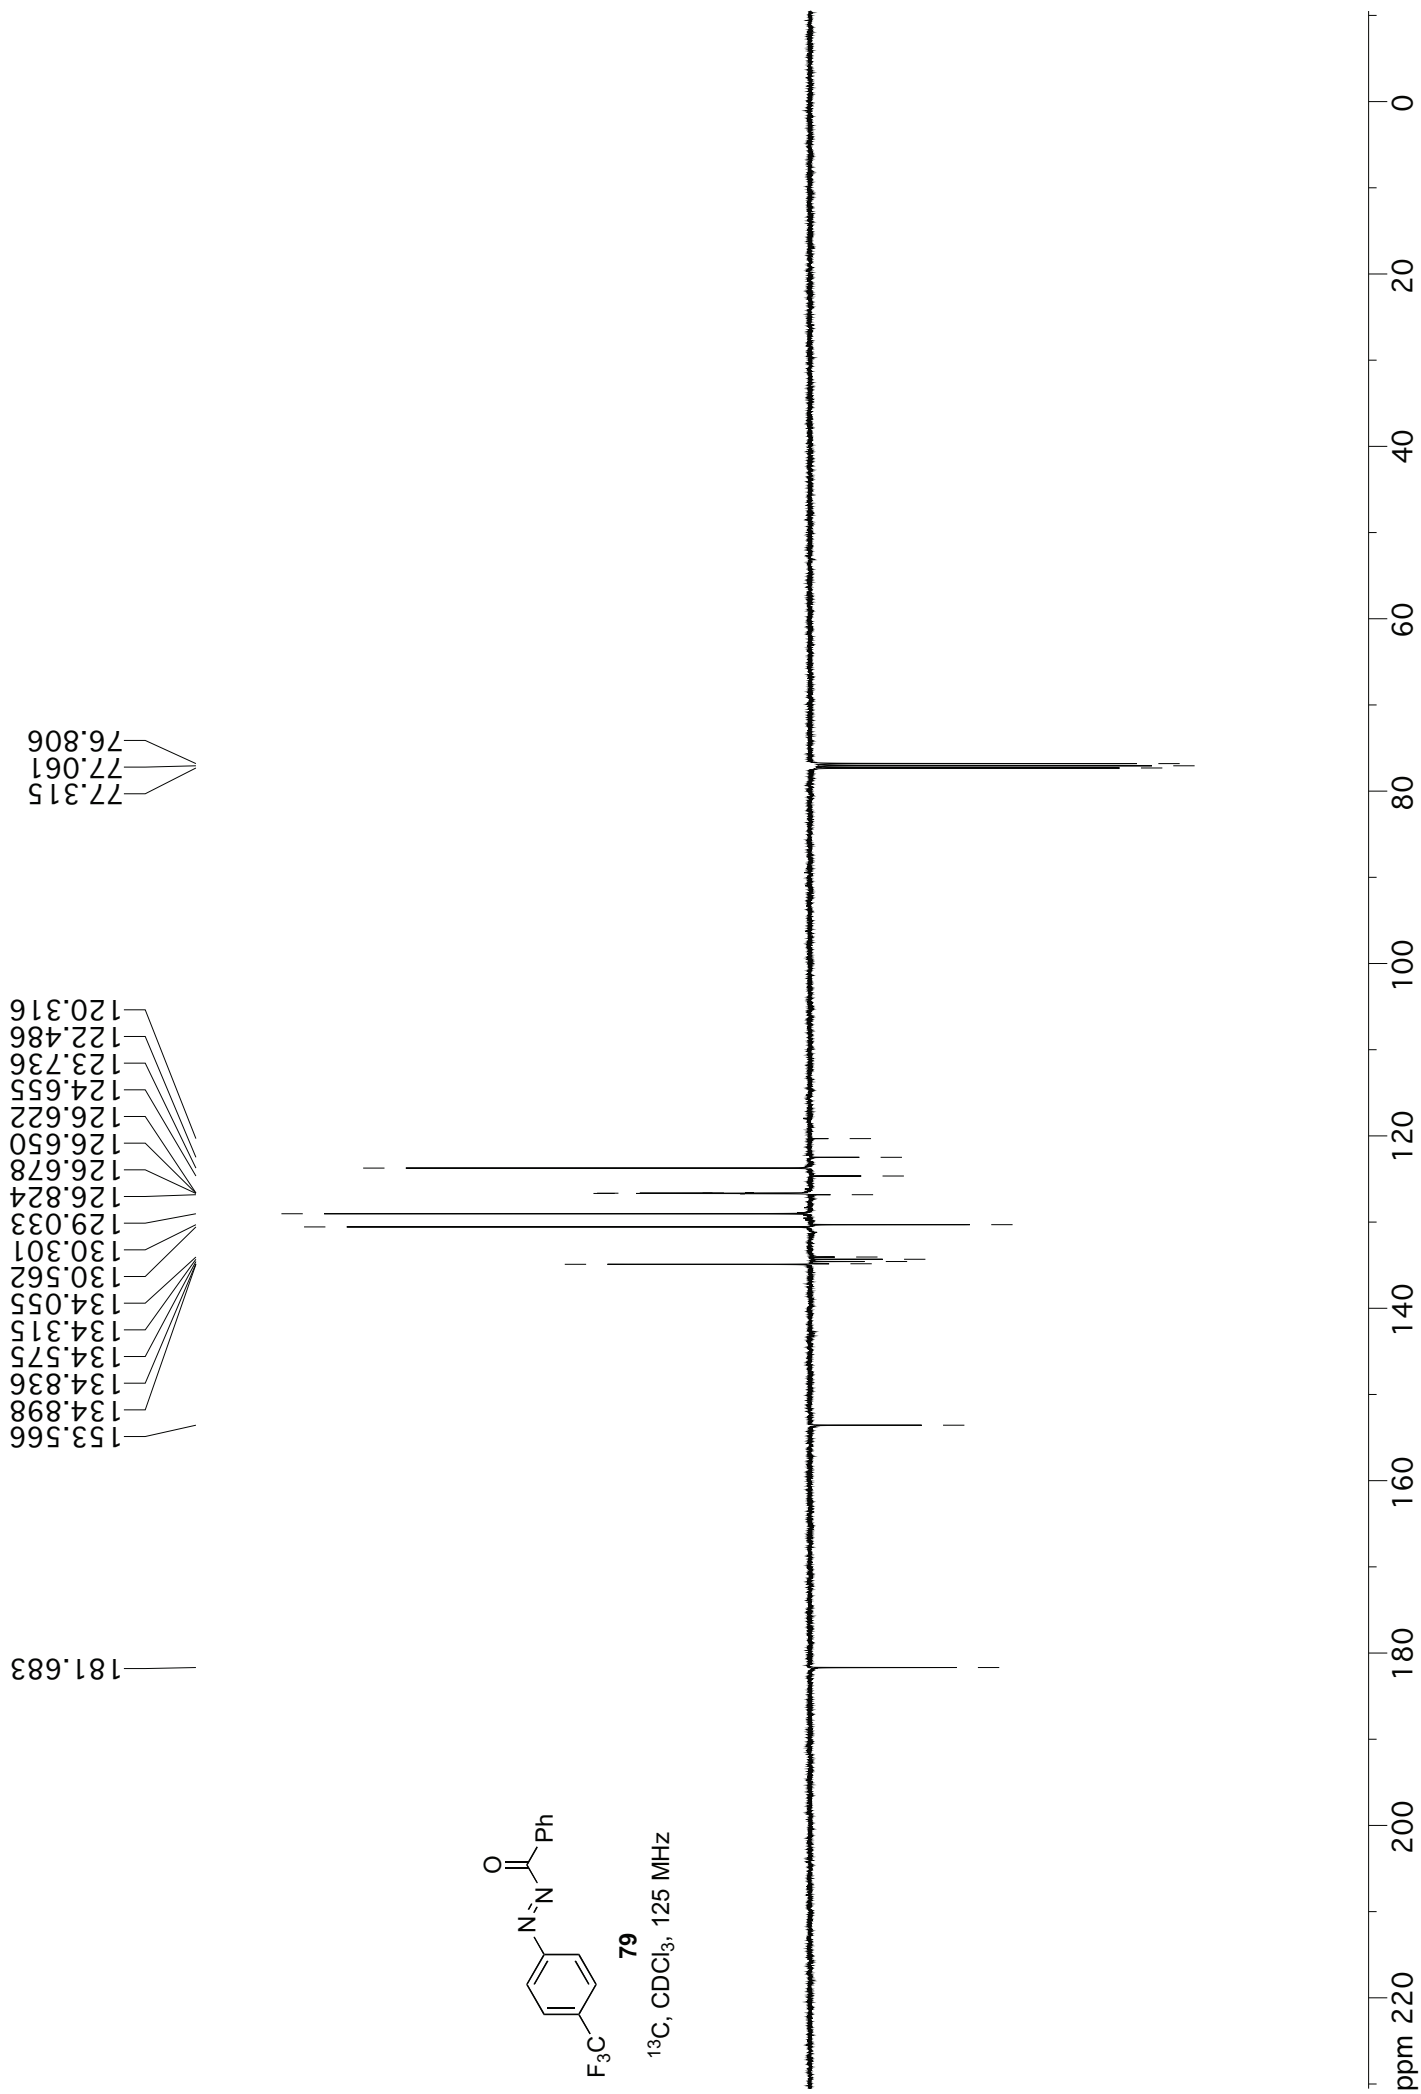

3.865

8.199  
8.179  
7.977  
7.972  
7.960  
7.955  
7.725  
7.704  
6.995  
6.989  
6.977  
6.972

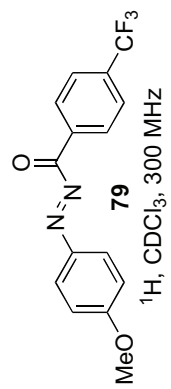

3.13

2.01

2.11

2

2

ppm

10

9

8

7

6

5

4

3

2

1

0

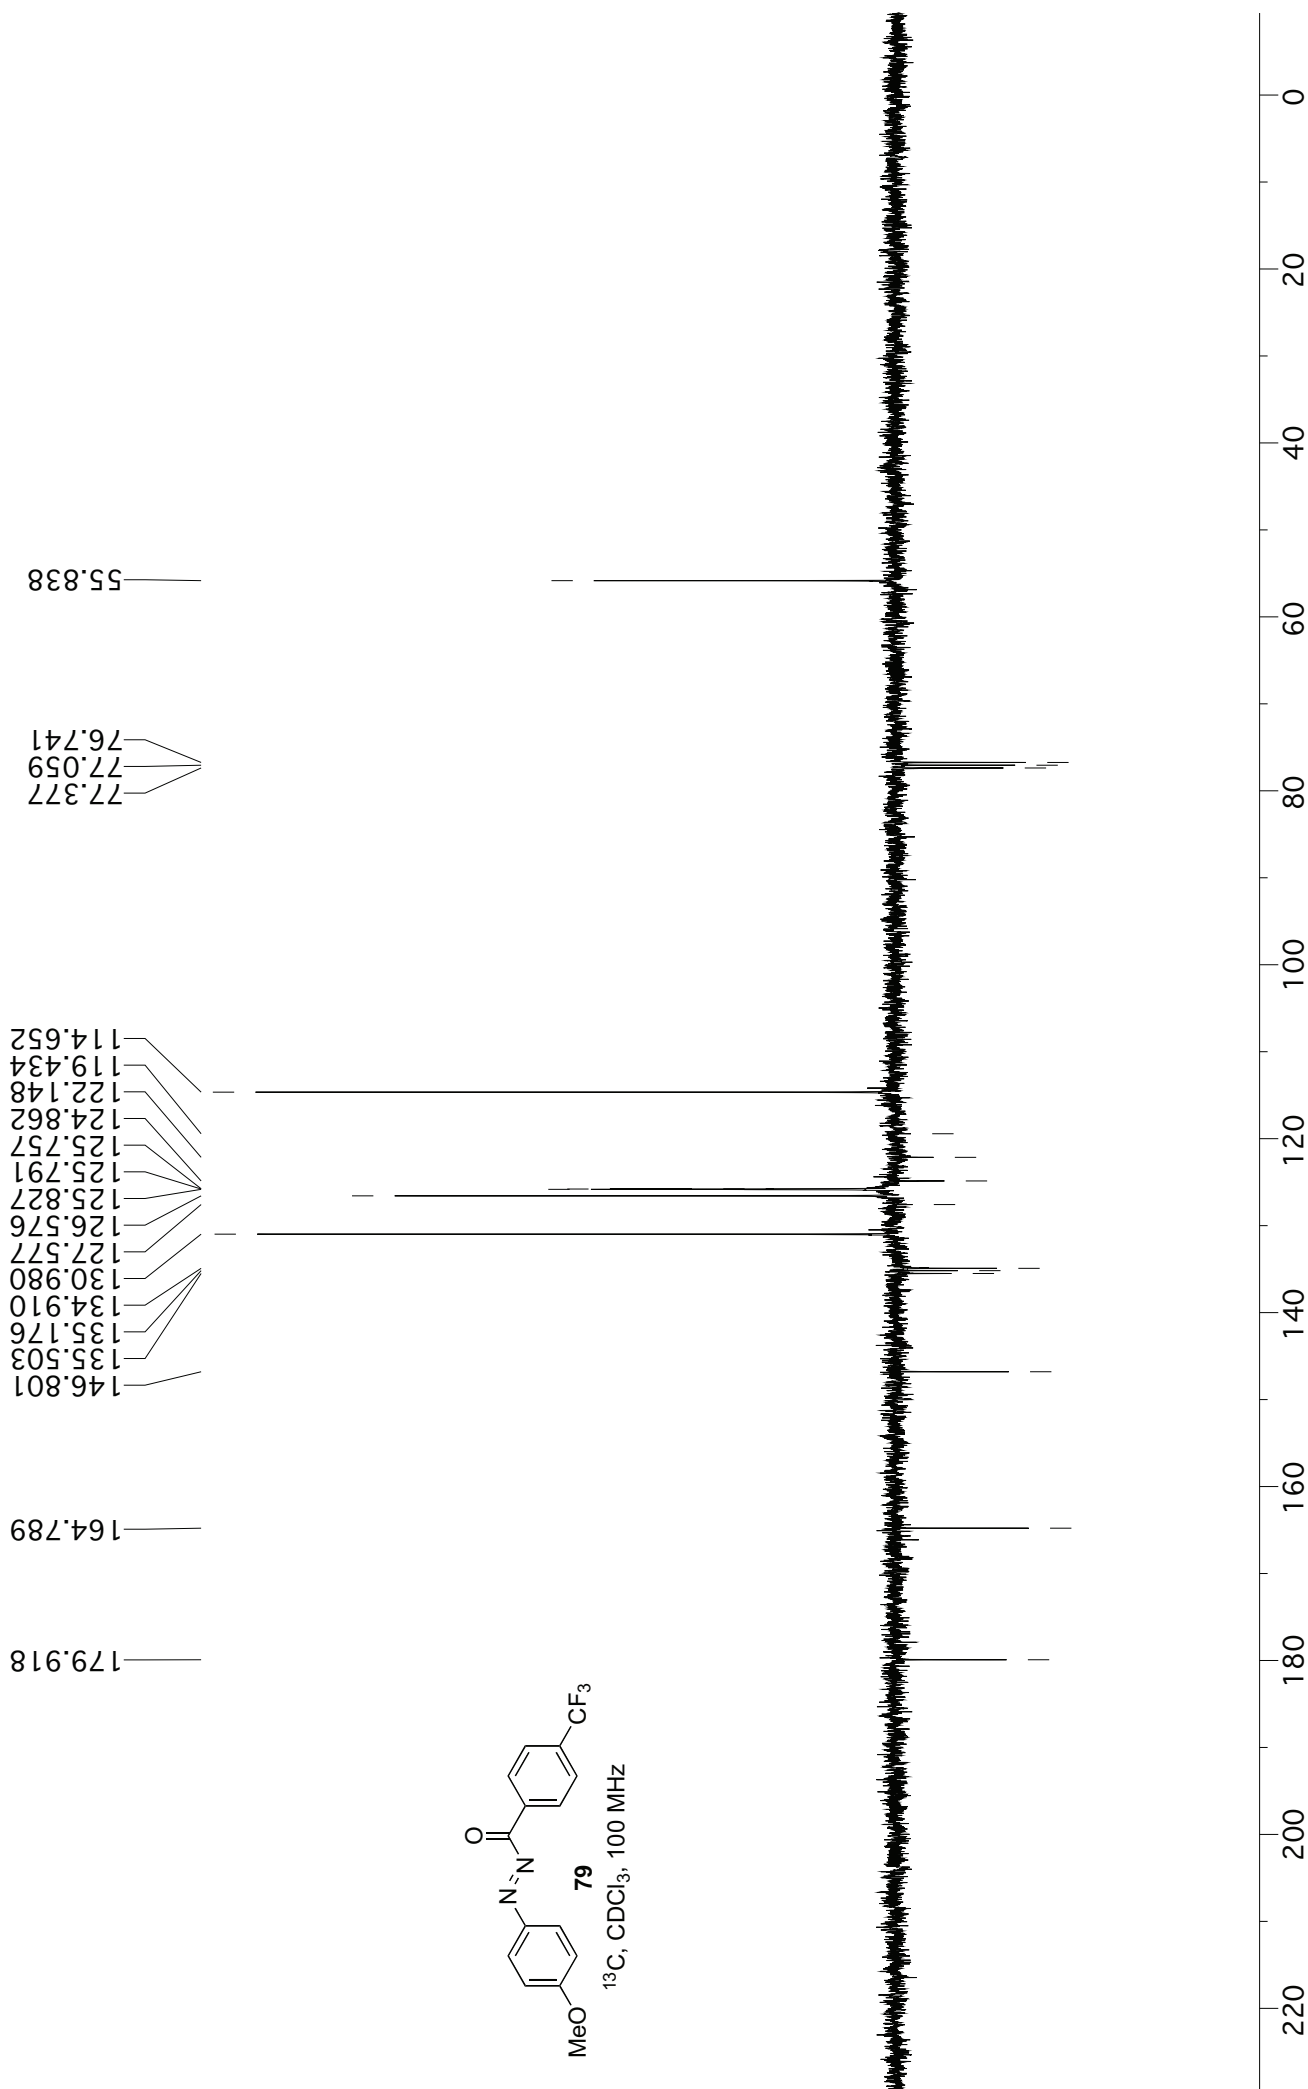

Supplement: c2sc20171b.pdf [file c2sc20171b.pdf]
